# Supplementary material for: Association between Frailty, Osteoporosis, Falls and Hip Fractures among Community-Dwelling People Aged 50 Years and Older in Taiwan: Results from I-Lan Longitudinal Aging Study
Source: PubMed Central journal article supplement (PMC4562637; doi:10.1371/journal.pone.0136968), 2015-09-08
Supplement: pone.0136968.s001.pdf [file pone.0136968.s001.pdf]

### ILAS frailty data

| No. | Age | Gender | Smoking | Alcohol | WC    | BMI   | WS   | GS   | Frail | Fat% | Fat   | LBM   | ASM   | RASM |
|-----|-----|--------|---------|---------|-------|-------|------|------|-------|------|-------|-------|-------|------|
| 1   | 55  | 2      | 0       | 0       | 105.1 | 35.89 | 0.84 | 18   | 1     |      |       |       |       |      |
| 2   | 52  | 1      | 1       | 0       | 82    | 24.56 | 1.5  | 35   | 0     | 29.3 | 19.07 | 46.04 | 20.37 | 7.31 |
| 3   | 69  | 2      | 0       | 0       | 82    | 26.65 | 1.2  | 17   | 1     | 36   | 19.88 | 35.35 | 15.95 | 7.01 |
| 4   | 68  | 2      | 0       | 0       | 94    | 29.52 | 1    | 25   | 1     | 36.6 | 22.69 | 39.34 | 17.10 | 7.21 |
| 5   | 52  | 2      | 0       | 0       | 79    | 22.67 | 1    | 21   | 1     | 32.5 | 14.99 | 31.13 | 10.50 | 4.92 |
| 6   | 53  | 1      | 1       | 1       | 81    | 23.35 | 2    | 42   | 0     | 22.1 | 12.17 | 42.80 | 19.31 | 8.11 |
| 7   | 83  | 1      | 1       | 0       | 67    | 15.55 | 0.6  | 23.5 | 2     | 10.4 | 4.31  | 37.04 | 14.69 | 5.08 |
| 8   | 53  | 2      | 0       | 0       | 94    | 24.97 | 1.2  | 25   | 0     | 42.6 | 24.19 | 32.56 | 14.53 | 6.05 |
| 9   | 62  | 1      | 0       | 1       | 70    | 22.99 | 1.2  | 46   | 1     | 15   | 8.23  | 46.68 | 20.91 | 8.42 |
| 10  | 74  | 1      | 0       | 1       | 85.5  | 25.42 | 1    | 30   | 1     | 29.9 | 18.47 | 43.27 | 18.08 | 7.26 |
| 11  | 61  | 1      | 1       | 1       | 93    | 26.20 | 1.2  | 46   | 1     | 27   | 19.78 | 53.43 | 25.40 | 8.73 |
| 12  | 55  | 2      | 0       | 0       | 78    | 23.67 | 1.5  | 23.5 | 1     | 33.1 | 17.63 | 35.66 | 14.99 | 6.43 |
| 13  | 51  | 2      | 1       | 1       | 80.5  | 21.97 | 1.5  | 21   | 0     | 42.3 | 21.85 | 29.78 | 11.47 | 4.82 |
| 14  | 56  | 1      | 0       | 0       | 95    | 28.60 | 2    | 46   | 0     | 34.5 | 26.65 | 50.54 | 23.93 | 8.65 |
| 15  | 69  | 1      | 3       | 1       | 87    | 25.34 | 1.5  | 32   | 0     | 24.3 | 14.49 | 45.09 | 20.46 | 8.53 |
| 16  | 50  | 2      | 0       | 0       | 70    | 19.56 | 2    | 33   | 0     | 25.7 | 10.69 | 30.84 | 13.36 | 5.94 |
| 17  | 75  | 1      | 1       | 1       | 92    | 22.83 | 0.98 | 40   | 1     | 24.7 | 14.74 | 44.84 | 18.58 | 6.91 |
| 18  | 61  | 2      | 0       | 0       | 70    | 20.22 | 1.6  | 19   | 0     | 32.5 | 14.46 | 30.04 | 12.68 | 5.64 |
| 19  | 82  | 2      | 0       | 0       | 96    | 25.33 | 1.04 | 16   | 2     | 36.5 | 20.81 | 36.24 | 15.30 | 6.8  |
| 20  | 70  | 1      | 1       | 0       | 90    | 24.53 | 1.47 | 28   | 1     | 23.4 | 14.20 | 46.54 | 19.04 | 7.44 |
| 21  | 58  | 2      | 0       | 0       | 76    | 21.91 | 1.04 | 10   | 1     | 26.5 | 11.51 | 31.97 | 12.76 | 5.67 |
| 22  | 71  | 2      | 0       | 0       | 72    | 27.97 | 1.1  | 22.5 | 1     | 36.7 | 21.03 | 36.24 | 14.90 | 7.08 |
| 23  | 81  | 2      | 0       | 0       | 104   | 28.44 | 0.7  | 20   | 2     | 44.8 | 28.12 | 34.67 | 13.61 | 6.05 |
| 24  | 58  | 1      | 0       | 0       | 88    | 22.81 | 1.35 | 36   | 0     | 23.6 | 14.22 | 46.13 | 21.39 | 7.86 |
| 25  | 78  | 1      | 1       | 0       | 94    | 25.33 | 1.17 | 25   | 1     | 27.4 | 15.25 | 40.46 | 16.38 | 7.28 |
| 26  | 82  | 2      | 0       | 0       | 74    | 18.90 | 0.84 | 5    | 2     | 32.8 | 14.20 | 29.13 | 11.22 | 4.83 |
| 27  | 74  | 2      | 0       | 0       | 80    | 28.54 | 0.88 | 15   | 2     | 23   | 9.63  | 32.31 | 14.18 | 6.74 |
| 28  | 80  | 1      | 3       | 1       | 104   | 29.52 | 0.7  | 31   | 1     | 33.9 | 23.21 | 45.27 | 18.62 | 7.85 |
| 29  | 82  | 2      | 0       | 0       | 97    | 30.41 | 0.77 | 16   | 1     | 43.4 | 24.49 | 31.97 | 11.10 | 6.03 |
| 30  | 91  | 1      | 1       | 0       | 106   | 26.60 | 0.59 | 7    | 2     | 28.5 | 19.90 | 49.82 | 21.55 | 8.12 |
| 31  | 67  | 2      | 0       | 0       | 87    | 26.97 | 1.17 | 28   | 1     | 39.1 | 27.12 | 42.32 | 18.16 | 7.01 |
| 32  | 61  | 2      | 0       | 0       | 85.7  | 26.40 | 1.17 | 26   | 1     | 40.1 | 22.60 | 33.81 | 13.93 | 6.43 |
| 33  | 51  | 2      | 0       | 0       | 66    | 21.38 | 0.98 | 32   | 1     | 29   | 14.9  |       |       |      |
| 34  | 68  | 2      | 0       | 0       | 80    | 27.10 | 0.88 | 20   | 1     | 37.9 | 23.3  |       |       |      |
| 35  | 53  | 1      | 0       | 0       | 76    | 23.22 | 1.1  | 30   | 1     | 25.6 | 14.47 | 42.13 | 18.40 | 7.28 |
| 36  | 78  | 1      | 1       | 0       | 72    | 20.37 | 0.88 | 25   | 2     | 13.3 | 6.46  | 42.18 | 18.41 | 7.82 |
| 37  | 60  | 1      | 1       | 0       | 84    | 24.34 | 1.04 | 38.5 | 1     | 20.3 | 12.10 | 47.44 | 19.90 | 8.07 |
| 38  | 62  | 1      | 1       | 1       | 88.5  | 24.59 | 1.96 | 35   | 0     | 27.9 | 19.88 | 51.36 | 23.57 | 7.88 |
| 39  | 86  | 2      | 3       | 0       | 81    | 23.19 | 0.7  | 8.5  | 1     | 41.4 | 22.60 | 32.06 | 13.47 | 5.68 |
| 40  | 71  | 1      | 0       | 0       | 90    | 26.08 | 1.35 | 43   | 2     | 32.8 | 22.84 | 46.73 | 21.46 | 7.88 |
| 41  | 77  | 1      | 0       | 0       | 80.2  | 22.83 | 0.84 | 21.5 | 1     | 26   | 14.76 | 41.90 | 18.77 | 7.56 |
| 42  | 59  | 2      | 0       | 0       | 90    | 27.34 | 0.8  | 25   | 1     | 41.5 | 28.83 | 40.70 | 17.58 | 6.87 |
| 43  | 73  | 2      | 0       | 0       | 87.5  | 26.10 | 0.7  | 19   | 1     | 42   | 26.37 | 36.37 | 14.74 | 6.09 |
| 44  | 57  | 2      | 0       | 0       | 71    | 22.56 | 1.1  | 24   | 1     | 32.1 | 15.97 | 33.72 | 13.72 | 6.06 |
| 45  | 55  | 2      | 0       | 1       | 82    | 23.05 | 1.76 | 22.5 | 1     | 35.5 | 19.49 | 35.36 | 15.12 | 6.3  |
| 46  | 69  | 2      | 1       | 0       | 80.9  | 25.76 | 1.04 | 22   | 1     | 35.7 | 20.64 | 37.20 | 15.67 | 6.94 |
| 47  | 77  | 1      | 3       | 0       | 89    | 24.09 | 1.47 | 34   | 0     | 30.5 | 18.54 | 42.28 | 17.59 | 6.96 |
| 48  | 68  | 1      | 1       | 0       | 98    | 27.48 | 0.39 | 21   | 2     | 31   | 22.50 | 50.07 | 20.78 | 7.82 |
| 49  | 56  | 1      | 1       | 1       | 91.5  | 26.78 | 1.17 | 23   | 1     | 26.8 | 18.35 | 50.18 | 21.79 | 8.39 |
| 50  | 83  | 2      | 0       | 0       | 83    | 20.10 | 0.7  | 10   | 2     | 28.6 | 12.17 | 30.40 | 12.64 | 5.92 |
| 51  | 61  | 1      | 0       | 0       | 84    | 24.46 | 1.26 | 26   | 1     | 22.8 | 13.81 | 46.63 | 20.36 | 8.13 |
| 52  | 57  | 1      | 0       | 1       | 75    | 17.38 | 1.35 | 35   | 1     | 14.5 | 6.89  | 40.66 | 17.44 | 6.28 |
| 53  | 88  | 1      | 3       | 0       | 92    | 25.26 | 0.77 | 20   | 1     | 28.9 | 17.34 | 42.63 | 17.19 | 7.37 |
| 54  | 69  | 1      | 0       | 0       | 89.1  | 24.94 | 0.98 | 30   | 1     | 22.8 | 14.26 | 48.38 | 20.02 | 7.89 |
| 55  | 68  | 2      | 0       | 0       | 96    | 29.01 | 0.98 | 23.5 | 1     | 40   | 25.60 | 38.42 | 15.36 | 6.92 |
| 56  | 70  | 2      | 0       | 1       | 79    | 22.12 | 0.88 | 22   | 1     | 26.8 | 13.44 | 36.72 | 15.79 | 6.97 |
| 57  | 75  | 2      | 0       | 0       | 76.5  | 22.63 | 1.26 | 20   | 0     | 34.6 | 16.94 | 31.96 | 14.16 | 6.5  |
| 58  | 81  | 1      | 0       | 0       | 95    | 25.90 | 0.88 | 27   | 2     | 34.6 | 22.43 | 42.32 | 17.13 | 6.74 |
| 59  | 56  | 2      | 0       | 1       | 69.5  | 20.03 | 0.98 | 23   | 1     | 28.7 | 13.14 | 32.72 | 13.80 | 6    |
| 60  | 80  | 2      | 0       | 0       | 90    | 27.64 | 0.98 | 24   | 1     | 42.6 | 24.81 | 33.47 | 13.05 | 6.11 |
| 61  | 61  | 2      | 0       | 0       | 80    | 25.11 | 1.17 | 25.5 | 1     | 39.1 | 22.54 | 35.16 | 15.07 | 6.56 |
| 62  | 67  | 1      | 1       | 0       | 68.5  | 17.71 | 0.98 | 32   | 1     | 8.4  | 3.95  | 43.11 | 18.76 | 7.07 |
| 63  | 61  | 1      | 0       | 0       | 91    | 28.62 | 1.1  | 54   | 1     | 27   | 19.96 | 53.96 | 24.66 | 9.36 |
| 64  | 63  | 2      | 0       | 0       | 78    | 23.92 | 1.1  | 17.5 | 1     | 42.8 | 26.17 | 34.90 | 14.15 | 5.48 |
| 65  | 82  | 1      | 1       | 0       | 89    | 24.20 | 0.98 | 30   | 1     | 30.9 | 18.96 | 42.42 | 18.16 | 7    |
| 66  | 55  | 2      | 0       | 0       | 70    | 21.24 | 0.88 | 13   | 2     | 30.2 | 14.34 | 33.13 | 13.35 | 5.85 |
| 67  | 73  | 1      | 3       | 0       | 84    | 23.14 | 1.04 | 32   | 1     | 21.8 | 12.81 | 46.01 | 18.91 | 7.41 |
| 68  | 62  | 2      | 0       | 1       | 68    | 17.93 | 1.17 | 17.5 | 1     | 21.8 | 8.93  | 32.09 | 13.23 | 5.7  |
| 69  | 64  | 2      | 0       | 0       | 79    | 21.56 | 0.98 | 18   | 1     | 32.9 | 16.42 | 33.56 | 13.47 | 5.7  |
| 70  | 63  | 2      | 0       | 0       | 75    | 23.78 | 1.17 | 19.5 | 0     | 39.6 | 20.97 | 32.00 | 13.69 | 6.11 |
| 71  | 56  | 2      | 0       | 0       | 96    | 32.11 | 1.17 | 28   | 0     | 36.5 | 26.75 | 46.51 | 19.58 | 8.55 |

|     |    |   |   |   |      |       |      |      |   |      |       |       |       |      |
|-----|----|---|---|---|------|-------|------|------|---|------|-------|-------|-------|------|
| 72  | 63 | 2 | 0 | 0 | 83   | 26.15 | 1.17 | 26.5 | 1 | 38.1 | 23.24 | 37.68 | 16.71 | 7.13 |
| 73  | 53 | 1 | 3 | 1 | 96.5 | 29.74 | 1.76 | 47   | 0 | 38.9 | 30.33 | 47.61 | 21.80 | 8.1  |
| 74  | 79 | 1 | 0 | 0 | 73.1 | 21.96 | 0.88 | 35   | 1 | 20.7 | 9.93  | 38.06 | 16.93 | 7.52 |
| 75  | 76 | 1 | 3 | 1 | 78   | 24.44 | 0.5  | 21   | 1 |      |       |       |       |      |
| 76  | 53 | 2 | 0 | 0 | 92   | 28.73 | 0.93 | 15   | 1 | 46.1 | 29.33 | 34.24 | 13.27 | 5.87 |
| 77  | 60 | 2 | 0 | 0 | 71   | 25.89 | 1.17 | 20.5 | 0 | 39.8 | 22.75 | 34.38 | 13.17 | 5.91 |
| 78  | 54 | 1 | 0 | 1 | 69   | 21.57 | 1.76 | 41   | 1 | 13.2 | 6.90  | 45.24 | 20.78 | 8.41 |
| 79  | 76 | 1 | 3 | 0 | 98   | 26.05 | 1.17 | 31   | 1 | 34.1 | 22.20 | 42.90 | 19.02 | 7.44 |
| 80  | 79 | 2 | 0 | 0 | 64.5 | 16.80 | 0.8  | 8    | 2 | 16.1 | 5.81  | 30.36 | 11.80 | 5.46 |
| 81  | 53 | 1 | 0 | 0 | 73   | 22.41 | 1.17 | 26   | 1 | 18.7 | 9.73  | 42.25 | 18.91 | 7.99 |
| 82  | 61 | 1 | 0 | 0 | 76.5 | 19.53 | 1.47 | 36   | 0 | 16.9 | 8.21  | 40.47 | 18.43 | 7.23 |
| 83  | 80 | 1 | 1 | 0 | 72   | 17.28 | 0.98 | 15   | 2 | 14.8 | 7.17  | 41.21 | 17.92 | 6.24 |
| 84  | 51 | 1 | 1 | 1 | 87   | 24.23 | 1.96 | 40   | 1 | 25.4 | 19.49 | 57.34 | 27.02 | 8.34 |
| 85  | 74 | 1 | 0 | 0 | 83   | 22.06 | 1.35 | 44   | 1 | 23.9 | 13.76 | 43.85 | 19.44 | 7.16 |
| 86  | 53 | 1 | 3 | 1 | 93   | 27.92 | 1.17 | 45   | 1 | 35.7 | 25.08 | 45.16 | 20.07 | 7.67 |
| 87  | 63 | 1 | 1 | 1 | 85   | 23.04 | 1.26 | 44.5 | 0 | 24.1 | 15.76 | 49.57 | 22.25 | 7.54 |
| 88  | 64 | 1 | 3 | 1 | 87   | 22.72 | 0.24 | 22   | 1 | 27.7 | 16.05 | 41.96 | 18.23 | 7.13 |
| 89  | 73 | 1 | 1 | 1 | 84.5 | 22.21 | 1.96 | 40   | 0 | 28.6 | 20.87 | 51.97 | 23.32 | 7.05 |
| 90  | 52 | 2 | 0 | 0 | 90   | 27.81 | 1.47 | 32   | 0 | 41.2 | 28.94 | 41.30 | 17.67 | 6.9  |
| 91  | 52 | 2 | 0 | 0 | 72   | 24.03 | 1.1  | 20   | 1 | 45.7 | 25.33 | 30.09 | 12.29 | 5.24 |
| 92  | 52 | 2 | 0 | 0 | 89   | 26.32 | 1.17 | 26   | 0 | 36.2 | 22.84 | 40.18 | 16.03 | 6.51 |
| 93  | 74 | 1 | 1 | 0 | 78   | 21.32 | 1.1  | 41   | 1 | 12.8 | 8.03  | 54.71 | 22.89 | 7.68 |
| 94  | 54 | 2 | 0 | 1 | 78.5 | 25.62 | 1.47 | 26   | 0 | 36.4 | 22.49 | 39.26 | 17.71 | 7.2  |
| 95  | 78 | 1 | 0 | 1 | 85.5 | 23.77 | 1.76 | 32   | 1 | 31.6 | 18.70 | 40.43 | 18.63 | 7.33 |
| 96  | 60 | 2 | 0 | 0 | 74   | 19.36 | 1.04 | 23   | 1 | 23.7 | 11.02 | 35.43 | 14.83 | 6.11 |
| 97  | 63 | 1 | 1 | 0 | 83   | 25.50 | 1.17 | 33   | 1 | 24.9 | 16.16 | 48.83 | 21.85 | 8.43 |
| 98  | 58 | 2 | 0 | 0 | 82   | 23.56 | 0.93 | 23   | 1 | 36.2 | 19.10 | 33.69 | 14.18 | 6.21 |
| 99  | 54 | 2 | 0 | 0 | 82   | 24.57 | 1.26 | 21.4 | 0 | 41.7 | 23.15 | 32.38 | 13.52 | 5.89 |
| 100 | 68 | 1 | 0 | 1 | 83   | 22.93 | 1.17 | 35   | 1 | 22.2 | 12.81 | 45.00 | 19.51 | 7.54 |
| 101 | 58 | 2 | 0 | 0 | 98.5 | 30.87 | 1.17 | 22   | 0 | 46.3 | 32.09 | 37.20 | 14.95 | 6.46 |
| 102 | 69 | 2 | 0 | 0 | 92   | 25.52 | 1.17 | 18   | 0 | 34.9 | 21.87 | 40.74 | 16.55 | 6.67 |
| 103 | 65 | 2 | 0 | 0 | 86   | 28.79 | 1.47 | 28   | 0 | 48.4 | 33.79 | 36.02 | 15.86 | 6.38 |
| 104 | 69 | 2 | 0 | 0 | 67.6 | 20.22 | 1.1  | 16   | 1 | 27.7 | 12.76 | 33.33 | 14.39 | 6.07 |
| 105 | 70 | 1 | 1 | 1 | 80   | 22.35 | 1.96 | 40   | 0 | 23.1 | 14.36 | 47.94 | 21.52 | 7.6  |
| 106 | 66 | 2 | 0 | 0 | 80   | 23.10 | 1.17 | 25   | 0 | 34   | 19.22 | 37.31 | 15.39 | 6.23 |
| 107 | 63 | 1 | 1 | 1 | 98   | 30.43 | 0.88 | 35   | 2 | 33.5 | 25.67 | 50.84 | 22.57 | 8.78 |
| 108 | 77 | 1 | 0 | 0 | 84   | 24.55 | 1.17 | 35   | 1 | 26.3 | 15.61 | 43.74 | 19.69 | 7.98 |
| 109 | 55 | 1 | 3 | 1 | 88   | 25.28 | 1.17 | 50   | 1 | 26.6 | 18.41 | 50.85 | 23.36 | 8.31 |
| 110 | 79 | 1 | 3 | 0 | 92   | 27.09 | 1.76 | 38   | 0 | 32.3 | 21.95 | 46.07 | 20.67 | 8.04 |
| 111 | 61 | 2 | 0 | 0 | 80.1 | 20.84 | 0.98 | 25   | 1 | 32.5 | 18.43 | 38.28 | 15.89 | 6.15 |
| 112 | 69 | 1 | 3 | 0 | 99.5 | 29.82 | 1.35 | 37   | 1 | 31.1 | 23.52 | 52.15 | 21.71 | 8.04 |
| 113 | 67 | 1 | 0 | 0 | 92   | 26.83 | 1.04 | 38   | 1 | 34.4 | 25.29 | 48.30 | 21.89 | 7.83 |
| 114 | 75 | 1 | 1 | 1 | 97   | 24.82 | 1.17 | 18   | 1 | 29.5 | 17.87 | 42.71 | 18.24 | 7.36 |
| 115 | 59 | 2 | 0 | 0 | 86   | 27.86 | 1.17 | 27   | 0 | 45.8 | 29.68 | 35.18 | 15.16 | 6.34 |
| 116 | 57 | 2 | 0 | 0 | 79   | 23.83 | 1.35 | 24   | 0 | 42   | 22.88 | 31.62 | 13.45 | 5.75 |
| 117 | 56 | 2 | 0 | 1 | 83   | 23.51 | 1.04 | 18   | 1 | 42.6 | 21.98 | 29.60 | 12.05 | 5.36 |
| 118 | 69 | 1 | 1 | 0 | 110  | 34.44 | 1.47 | 25   | 1 | 33   | 25.53 | 51.76 | 19.02 | 8.16 |
| 119 | 59 | 1 | 0 | 1 | 82   | 21.43 | 1.76 | 44   | 0 | 11   | 6.88  | 55.93 | 24.69 | 8.27 |
| 120 | 70 | 1 | 1 | 0 | 89   | 25.62 | 1.6  | 33   | 0 | 25.3 | 15.85 | 46.90 | 19.66 | 7.9  |
| 121 | 64 | 1 | 1 | 1 | 95   | 27.68 | 1.26 | 49   | 0 | 32.4 | 23.95 | 50.00 | 22.27 | 8.12 |
| 122 | 59 | 2 | 0 | 0 | 82   | 25.20 | 1.35 | 25   | 0 | 40.8 | 22.14 | 32.17 | 13.16 | 6.01 |
| 123 | 55 | 1 | 1 | 1 | 91   | 24.18 | 1.76 | 50   | 1 | 28.2 | 18.75 | 47.85 | 21.35 | 7.55 |
| 124 | 66 | 1 | 1 | 0 | 80   | 19.66 | 1.76 | 28   | 1 | 25.3 | 13.36 | 39.43 | 16.03 | 5.82 |
| 125 | 63 | 1 | 3 | 1 | 94   | 25.33 | 1.04 | 32   | 1 | 25.2 | 16.43 | 48.72 | 20.96 | 8.01 |
| 126 | 59 | 2 | 0 | 0 | 79   | 23.56 | 1.17 | 15   | 1 | 36.5 | 19.03 | 33.17 | 13.26 | 5.9  |
| 127 | 55 | 1 | 1 | 1 | 81   | 21.24 | 1.35 | 42   | 1 | 20.5 | 12.05 | 46.63 | 21.00 | 7.34 |
| 128 | 72 | 1 | 1 | 1 | 93   | 30.34 | 1.04 | 45   | 1 | 32.2 | 25.39 | 53.48 | 23.85 | 8.91 |
| 129 | 65 | 1 | 0 | 0 | 105  | 33.68 | 0.98 | 32   | 1 | 33.2 | 27.92 | 56.29 | 21.90 | 8.59 |
| 130 | 61 | 1 | 3 | 1 | 78   | 24.26 | 1.1  | 41.5 | 1 | 22.8 | 14.35 | 48.73 | 22.11 | 8.25 |
| 131 | 53 | 2 | 0 | 0 | 90   | 25.29 | 1.76 | 30   | 0 | 36.1 | 24.62 | 43.50 | 19.03 | 6.91 |
| 132 | 58 | 1 | 0 | 0 | 98   | 31.77 | 1.47 | 40   | 1 | 31.7 | 24.34 | 52.52 | 21.76 | 8.83 |
| 133 | 53 | 1 | 1 | 0 | 79   | 22.46 | 1.47 | 41.5 | 1 | 21.6 | 11.80 | 42.80 | 19.57 | 7.82 |
| 134 | 60 | 1 | 0 | 0 | 96   | 28.77 | 1.26 | 34   | 1 | 35   | 30.10 | 55.79 | 25.18 | 8.28 |
| 135 | 56 | 1 | 0 | 1 | 73   | 20.81 | 2.2  | 41   | 0 | 16.2 | 10.92 | 56.46 | 25.18 | 7.56 |
| 136 | 80 | 2 | 0 | 0 | 98.2 | 29.79 | 0.63 | 10   | 2 | 47.4 | 31.14 | 34.59 | 13.25 | 5.87 |
| 137 | 52 | 2 | 1 | 1 | 80   | 20.85 | 1.17 | 20   | 1 | 35.7 | 16.09 | 28.96 | 12.33 | 5.61 |
| 138 | 77 | 1 | 1 | 0 | 87   | 23.10 | 1.1  | 32   | 2 | 30.4 | 19.86 | 45.43 | 19.36 | 6.79 |
| 139 | 51 | 1 | 0 | 1 | 80   | 23.39 | 1.17 | 39   | 1 | 25   | 15.59 | 46.88 | 21.46 | 7.85 |
| 140 | 53 | 2 | 0 | 1 | 77   | 24.83 | 2.2  | 31   | 0 | 34.5 | 20.98 | 39.90 | 18.74 | 7.38 |
| 141 | 82 | 1 | 0 | 1 | 86   | 23.59 | 1.17 | 27   | 1 | 28   | 16.45 | 42.25 | 18.60 | 7.23 |
| 142 | 53 | 1 | 1 | 1 | 84   | 23.99 | 1.17 | 47   | 1 | 22   | 14.24 | 50.34 | 21.87 | 7.93 |
| 143 | 80 | 1 | 3 | 0 | 88   | 22.31 | 0.88 | 20   | 2 | 23.2 | 13.69 | 45.26 | 18.79 | 6.99 |

|     |    |   |   |   |      |       |      |      |   |      |       |       |       |      |
|-----|----|---|---|---|------|-------|------|------|---|------|-------|-------|-------|------|
| 144 | 51 | 1 | 1 | 1 | 87   | 23.07 | 1.76 | 46   | 0 | 24.4 | 16.24 | 50.36 | 22.90 | 7.72 |
| 145 | 72 | 2 | 1 | 1 | 84   | 25.29 | 0.98 | 25   | 1 | 41.9 | 24.67 | 34.27 | 14.15 | 6    |
| 146 | 64 | 2 | 0 | 0 | 86.5 | 28.07 | 1.35 | 31   | 1 | 45.9 | 34.14 | 40.28 | 17.80 | 6.63 |
| 147 | 60 | 2 | 0 | 0 | 67   | 21.36 | 0.88 | 23   | 2 | 29.6 | 12.87 | 30.63 | 12.92 | 6.01 |
| 148 | 56 | 2 | 0 | 1 | 83   | 23.71 | 1.76 | 25   | 1 | 38.1 | 21.25 | 34.51 | 14.12 | 6    |
| 149 | 60 | 2 | 0 | 0 | 95   | 32.47 | 0.98 | 28   | 1 | 42.5 | 30.08 | 40.64 | 17.05 | 7.26 |
| 150 | 66 | 2 | 1 | 0 | 99   | 28.48 | 1.6  | 35   | 0 | 39.6 | 28.20 | 42.95 | 18.34 | 7.25 |
| 151 | 51 | 1 | 1 | 1 | 90   | 25.42 | 1.76 | 45   | 0 |      |       |       |       |      |
| 152 | 53 | 2 | 0 | 0 | 74.5 | 20.51 | 1.96 | 26   | 1 | 32.8 | 16.31 | 33.48 | 13.86 | 5.65 |
| 153 | 63 | 1 | 1 | 1 | 80   | 24.89 | 1.1  | 40.5 | 1 | 22.6 | 13.44 | 46.01 | 20.74 | 8.49 |
| 154 | 63 | 2 | 0 | 0 | 80   | 24.00 | 0.88 | 17   | 1 | 33.5 | 19.80 | 39.34 | 16.73 | 6.56 |
| 155 | 73 | 2 | 0 | 0 | 72   | 19.99 | 1.35 | 20   | 0 | 24.9 | 10.88 | 32.75 | 13.04 | 5.9  |
| 156 | 56 | 1 | 0 | 1 | 85   | 23.36 | 2.51 | 52   | 0 | 18.6 | 12.55 | 54.77 | 24.92 | 8.47 |
| 157 | 58 | 1 | 0 | 1 | 82   | 21.77 | 1.76 | 35   | 0 | 21.1 | 10.97 | 40.92 | 17.46 | 7.07 |
| 158 | 65 | 1 | 1 | 1 | 83   | 24.14 | 1.17 | 48   | 1 | 19.7 | 12.68 | 51.57 | 23.07 | 8.57 |
| 159 | 64 | 1 | 3 | 1 | 105  | 30.05 | 1.35 | 40   | 0 | 27.9 | 22.54 | 58.27 | 24.88 | 9.05 |
| 160 | 54 | 2 | 0 | 0 | 82   | 26.15 | 0.98 | 25   | 1 | 34.5 | 20.63 | 39.12 | 15.16 | 6.47 |
| 161 | 60 | 2 | 0 | 1 | 80   | 23.59 | 1.6  | 27   | 0 | 32.3 | 17.83 | 37.38 | 15.22 | 6.47 |
| 162 | 56 | 2 | 0 | 0 | 88.5 | 23.84 | 1.17 | 26   | 0 | 33.5 | 20.99 | 41.64 | 16.84 | 6.36 |
| 163 | 61 | 2 | 1 | 0 | 90   | 22.57 | 0.98 | 18   | 1 | 45.6 | 24.24 | 28.89 | 11.40 | 4.72 |
| 164 | 56 | 2 | 1 | 0 | 80   | 25.26 | 0.88 | 26   | 1 | 43.2 | 25.65 | 33.76 | 13.76 | 5.6  |
| 165 | 60 | 1 | 0 | 1 | 89   | 27.15 | 1.96 | 41   | 0 | 25.5 | 18.54 | 54.07 | 24.82 | 9.1  |
| 166 | 57 | 1 | 0 | 1 | 94.5 | 30.31 | 1.6  | 46   | 0 | 35.7 | 25.37 | 45.61 | 20.90 | 8.7  |
| 167 | 54 | 2 | 0 | 0 | 75.5 | 23.33 | 1.47 | 24   | 0 | 38.9 | 20.39 | 32.01 | 13.62 | 5.9  |
| 168 | 64 | 1 | 0 | 0 | 89   | 24.32 | 1.17 | 44   | 1 | 29.4 | 19.66 | 47.11 | 20.17 | 7.23 |
| 169 | 71 | 2 | 0 | 0 | 85   | 35.21 | 1.04 | 22   | 1 | 48.2 | 28.73 | 30.92 | 12.98 | 6.35 |
| 170 | 60 | 2 | 0 | 0 | 107  | 32.91 | 1.35 | 21   | 0 | 49.9 | 39.21 | 39.30 | 17.27 | 7.1  |
| 171 | 72 | 2 | 0 | 1 | 86   | 24.36 | 1.26 | 20   | 0 | 32.1 | 18.57 | 39.23 | 16.45 | 6.84 |
| 172 | 61 | 1 | 0 | 1 | 67   | 18.59 | 1.76 | 40   | 0 | 16.2 | 8.04  | 41.47 | 18.51 | 6.97 |
| 173 | 70 | 2 | 0 | 0 | 89   | 28.94 | 1.17 | 8.5  | 1 | 45   | 27.15 | 33.15 | 14.00 | 6.57 |
| 174 | 57 | 1 | 3 | 1 | 106  | 32.08 | 1.76 | 42   | 0 | 37   | 29.40 | 49.95 | 22.01 | 8.7  |
| 175 | 70 | 2 | 0 | 0 | 90   | 28.85 | 1.26 | 22   | 0 | 41.8 | 25.98 | 36.16 | 15.07 | 6.79 |
| 176 | 66 | 2 | 0 | 0 | 86   | 26.44 | 0.98 | 25   | 1 | 37.2 | 23.77 | 40.06 | 17.09 | 6.93 |
| 177 | 63 | 2 | 0 | 0 | 86   | 22.27 | 1.35 | 26   | 1 | 39.8 | 22.45 | 33.92 | 13.78 | 5.32 |
| 178 | 57 | 2 | 0 | 0 | 89   | 28.04 | 1.1  | 26   | 1 | 42   | 29.81 | 41.11 | 16.75 | 6.54 |
| 179 | 57 | 1 | 1 | 1 | 87   | 25.00 | 1.35 | 43   | 1 | 19.7 | 12.45 | 50.59 | 22.36 | 8.73 |
| 180 | 67 | 1 | 1 | 1 | 100  | 25.08 | 1.17 | 32   | 1 | 27.1 | 18.37 | 49.42 | 20.70 | 7.42 |
| 181 | 52 | 2 | 0 | 0 | 77   | 25.14 | 1.35 | 30   | 0 | 44.7 | 26.94 | 33.36 | 14.92 | 6.05 |
| 182 | 57 | 1 | 0 | 0 | 94   | 28.34 | 1.26 | 50   | 0 | 35.8 | 28.59 | 51.36 | 23.40 | 8.1  |
| 183 | 55 | 2 | 0 | 1 | 78   | 22.18 | 1.35 | 26.5 | 0 | 29   | 15.83 | 38.73 | 16.88 | 6.76 |
| 184 | 82 | 1 | 0 | 0 | 80   | 23.45 | 1.26 | 20   | 1 | 25.3 | 12.62 | 37.24 | 15.00 | 7.23 |
| 185 | 68 | 1 | 3 | 1 | 90   | 25.48 | 1.47 | 43   | 0 | 20.8 | 15.07 | 57.41 | 26.02 | 9.27 |
| 186 | 63 | 1 | 0 | 1 | 96   | 26.64 | 1.17 | 22   | 2 | 32.7 | 22.00 | 45.23 | 19.33 | 7.28 |
| 187 | 57 | 1 | 0 | 1 | 93   | 27.46 | 1.35 | 44   | 1 | 33.8 | 25.25 | 49.49 | 22.83 | 8.21 |
| 188 | 57 | 2 | 0 | 1 | 82   | 25.07 | 1.35 | 23   | 0 | 37.4 | 20.99 | 35.18 | 15.00 | 6.58 |
| 189 | 54 | 1 | 0 | 0 | 84   | 22.73 | 2.51 | 30   | 1 | 23.4 | 14.50 | 47.43 | 21.22 | 7.61 |
| 190 | 53 | 2 | 0 | 1 | 82   | 22.42 | 1.26 | 30   | 0 | 41.3 | 22.08 | 31.34 | 13.54 | 5.43 |
| 191 | 73 | 1 | 1 | 1 | 99   | 26.26 | 1.17 | 28   | 1 | 24   | 17.79 | 56.48 | 24.19 | 8.18 |
| 192 | 70 | 1 | 3 | 1 | 90.6 | 24.89 | 1.17 | 32   | 1 | 30.9 | 18.45 | 41.26 | 18.13 | 7.17 |
| 193 | 62 | 2 | 0 | 0 | 74   | 20.00 | 1.17 | 21.5 | 0 | 32.6 | 15.13 | 31.23 | 11.04 | 4.78 |
| 194 | 61 | 1 | 1 | 1 | 89   | 24.84 | 1.6  | 40   | 0 | 21   | 13.76 | 51.61 | 23.04 | 8.46 |
| 195 | 70 | 1 | 3 | 0 | 101  | 31.66 | 1.47 | 41   | 0 | 36.4 | 30.80 | 53.73 | 22.59 | 8.3  |
| 196 | 71 | 1 | 0 | 1 | 89   | 25.06 | 1.6  | 35   | 1 | 28.2 | 17.70 | 45.07 | 19.79 | 7.73 |
| 197 | 62 | 1 | 3 | 0 | 89   | 24.87 | 1.35 | 35   | 0 | 30.2 | 19.15 | 44.23 | 18.56 | 7.25 |
| 198 | 61 | 2 | 0 | 0 | 73   | 24.66 | 1.17 | 17   | 1 | 43.7 | 20.75 | 26.76 | 10.07 | 5.07 |
| 199 | 59 | 2 | 0 | 0 | 80   | 22.03 | 1.1  | 13   | 1 | 36.9 | 17.61 | 30.07 | 12.78 | 5.76 |
| 200 | 55 | 2 | 0 | 0 | 83   | 23.38 | 1.6  | 20.5 | 0 | 35.3 | 18.57 | 33.98 | 14.41 | 6.32 |
| 201 | 69 | 2 | 0 | 1 | 89   | 24.44 | 1.6  | 21   | 0 | 33.6 | 15.61 | 30.81 | 11.38 | 5.81 |
| 202 | 66 | 2 | 0 | 0 | 92   | 28.98 | 1.17 | 19   | 1 | 40.5 | 25.68 | 37.68 | 14.58 | 6.48 |
| 203 | 71 | 1 | 1 | 1 | 99   | 27.93 | 1.35 | 35   | 1 | 26.2 | 18.37 | 51.81 | 20.95 | 8.08 |
| 204 | 51 | 2 | 0 | 0 | 68   | 21.57 | 1.96 | 5    | 1 | 33.5 | 18.36 | 36.45 | 16.03 | 6.25 |
| 205 | 51 | 1 | 0 | 0 | 95   | 29.28 | 1.17 | 32.5 | 1 | 30.8 | 24.36 | 54.66 | 24.99 | 9.07 |
| 206 | 52 | 1 | 1 | 1 | 90   | 25.13 | 1.04 | 33   | 1 | 21   | 14.25 | 53.53 | 22.38 | 8.22 |
| 207 | 58 | 1 | 0 | 1 | 90   | 26.36 | 1.6  | 32   | 0 | 30.1 | 21.61 | 50.25 | 23.27 | 8.34 |
| 208 | 66 | 1 | 1 | 0 | 86.5 | 25.22 | 1.35 | 30   | 0 | 25   | 16.54 | 49.63 | 23.17 | 8.72 |
| 209 | 55 | 2 | 0 | 0 | 94.5 | 32.13 | 1.26 | 25   | 0 | 50.9 | 37.75 | 36.38 | 15.49 | 6.53 |
| 210 | 56 | 2 | 0 | 0 | 96   | 25.57 | 1.1  | 24   | 1 | 28   | 17.74 | 45.55 | 16.47 | 6.6  |
| 211 | 62 | 1 | 1 | 1 | 87   | 24.84 | 1.17 | 30   | 1 | 23.3 | 14.04 | 46.09 | 19.86 | 8.04 |
| 212 | 56 | 2 | 0 | 1 | 76.5 | 23.05 | 1.04 | 23   | 1 | 38.7 | 23.53 | 37.26 | 16.45 | 6.12 |
| 213 | 57 | 2 | 0 | 0 | 82   | 26.06 | 1.6  | 25   | 0 | 38.2 | 22.66 | 36.70 | 9.81  | 4.19 |
| 214 | 65 | 2 | 0 | 1 | 91.5 | 27.56 | 0.98 | 19   | 1 | 39.1 | 23.58 | 36.72 | 14.06 | 6.25 |
| 215 | 77 | 1 | 0 | 0 | 85   | 22.86 | 1.47 | 30   | 0 | 24.1 | 14.75 | 46.49 | 19.84 | 7.2  |

|     |    |   |   |   |       |       |      |      |   |      |       |       |       |      |
|-----|----|---|---|---|-------|-------|------|------|---|------|-------|-------|-------|------|
| 216 | 65 | 2 | 0 | 0 | 91    | 27.57 | 1.04 | 21   | 2 | 39.4 | 26.42 | 40.59 | 18.03 | 7.42 |
| 217 | 53 | 2 | 0 | 0 | 80    | 21.88 | 0.98 | 29   | 1 | 30.7 | 16.93 | 38.22 | 16.23 | 6.34 |
| 218 | 56 | 1 | 3 | 1 | 89    | 22.12 | 1.76 | 47   | 0 | 13   | 8.54  | 57.12 | 26.80 | 8.96 |
| 219 | 71 | 2 | 0 | 0 | 77    | 23.46 | 1.17 | 23   | 1 | 27.4 | 16.34 | 43.36 | 18.19 | 7.26 |
| 220 | 57 | 2 | 0 | 0 | 124   | 39.38 | 1.17 | 30   | 0 |      |       |       |       |      |
| 221 | 66 | 2 | 0 | 0 | 87    | 26.41 | 1.1  | 18   | 1 | 41   | 25.12 | 36.17 | 14.74 | 6.29 |
| 222 | 61 | 1 | 0 | 0 | 81    | 22.54 | 1.17 | 37   | 1 | 19.2 | 11.30 | 47.47 | 20.73 | 7.92 |
| 223 | 64 | 2 | 0 | 0 | 88    | 29.10 | 0.88 | 20   | 2 | 44.9 | 27.61 | 33.84 | 14.46 | 6.77 |
| 224 | 79 | 1 | 1 | 0 | 88    | 25.85 | 1.47 | 18   | 1 | 25.8 | 17.12 | 49.35 | 21.11 | 8.26 |
| 225 | 72 | 2 | 0 | 0 | 88    | 25.30 | 2    | 28   | 0 | 38.6 | 25.44 | 40.49 | 16.11 | 6.18 |
| 226 | 71 | 2 | 0 | 0 | 95.5  | 25.16 | 0.86 | 21   | 2 | 36   | 18.51 | 32.87 | 13.79 | 6.7  |
| 227 | 67 | 2 | 0 | 0 | 88    | 30.75 | 0.75 | 15   | 1 | 44.9 | 30.13 | 36.92 | 15.38 | 7.07 |
| 228 | 53 | 1 | 1 | 1 | 77    | 22.28 | 1.5  | 45   | 0 | 13.7 | 8.89  | 55.84 | 25.90 | 8.74 |
| 229 | 64 | 1 | 1 | 0 | 99    | 29.96 | 1.2  | 40.5 | 1 | 31.9 | 23.67 | 50.54 | 21.58 | 8.67 |
| 230 | 73 | 2 | 0 | 1 | 85    | 23.69 | 0.67 | 20   | 1 | 34.3 | 17.07 | 32.76 | 13.28 | 6.19 |
| 231 | 53 | 2 | 0 | 0 | 113   | 37.04 | 1.5  | 32   | 0 | 43   | 38.44 | 51.00 | 20.41 | 8.16 |
| 232 | 71 | 1 | 1 | 0 | 67    | 18.93 | 1    | 28   | 1 | 10.5 | 5.12  | 43.64 | 19.52 | 7.3  |
| 233 | 74 | 2 | 0 | 1 | 83    | 26.29 | 1.5  | 19   | 0 | 33.5 | 19.32 | 38.34 | 16.12 | 7.05 |
| 234 | 78 | 2 | 0 | 1 | 72.5  | 18.95 | 0.86 | 17   | 2 |      |       |       |       |      |
| 235 | 57 | 2 | 0 | 1 | 80    | 22.75 | 1.2  | 24.5 | 0 | 37   | 19.74 | 33.59 | 13.96 | 5.72 |
| 236 | 55 | 1 | 3 | 0 | 90    | 26.04 | 1.5  | 49.5 | 0 | 27.5 | 20.17 | 53.19 | 23.54 | 8.17 |
| 237 | 53 | 1 | 0 | 1 | 96    | 28.18 | 2    | 54   | 1 | 28.4 | 24.74 | 62.37 | 28.24 | 8.87 |
| 238 | 53 | 1 | 0 | 1 | 102.5 | 30.65 | 1.2  | 41.5 | 1 | 31.6 | 29.03 | 62.98 | 29.97 | 9.73 |
| 239 | 73 | 1 | 1 | 0 | 80    | 21.53 | 2    | 25   | 1 | 22.9 | 12.24 | 41.12 | 18.51 | 7.26 |
| 240 | 54 | 1 | 0 | 1 | 83    | 24.79 | 2    | 46   | 1 | 23.6 | 16.83 | 54.62 | 25.44 | 8.5  |
| 241 | 72 | 1 | 3 | 0 | 84    | 22.18 | 1.2  | 34   | 1 | 24.8 | 15.59 | 47.39 | 20.45 | 6.94 |
| 242 | 67 | 1 | 1 | 0 | 103   | 27.87 | 1.2  | 37   | 1 | 30.7 | 22.93 | 51.83 | 20.65 | 7.38 |
| 243 | 56 | 1 | 1 | 1 | 86.5  | 25.17 | 1.5  | 49   | 0 | 30.6 | 23.58 | 53.48 | 24.17 | 7.66 |
| 244 | 69 | 2 | 0 | 0 | 81    | 24.07 | 1.5  | 24   | 0 | 40.4 | 24.84 | 36.58 | 15.85 | 6.29 |
| 245 | 53 | 1 | 0 | 1 | 94    | 26.26 | 2    | 34   | 0 | 28   | 21.43 | 55.11 | 24.97 | 8.45 |
| 246 | 57 | 1 | 0 | 0 | 82.5  | 22.28 | 1.5  | 41   | 0 | 21.1 | 13.44 | 50.23 | 22.51 | 7.83 |
| 247 | 54 | 2 | 1 | 1 | 97    | 30.56 | 1.5  | 23   | 1 | 45.1 | 35.06 | 42.60 | 17.10 | 6.51 |
| 248 | 55 | 1 | 0 | 1 | 79    | 22.55 | 3    | 45.5 | 0 | 15.9 | 8.46  | 44.78 | 19.50 | 8.13 |
| 249 | 54 | 1 | 1 | 1 | 84    | 24.15 | 1.2  | 50   | 1 |      |       |       |       |      |
| 250 | 52 | 2 | 0 | 0 | 79    | 21.14 | 1.2  | 17.5 | 1 |      |       |       |       |      |
| 251 | 72 | 1 | 0 | 1 | 83    | 23.78 | 2    | 32   | 0 | 24.7 | 14.58 | 44.43 | 19.59 | 7.9  |
| 252 | 59 | 1 | 1 | 1 | 88    | 23.31 | 3    | 36   | 1 | 23.4 | 13.56 | 44.51 | 19.26 | 7.46 |
| 253 | 74 | 1 | 1 | 0 | 88    | 23.37 | 1.5  | 31   | 0 |      |       |       |       |      |
| 254 | 78 | 2 | 3 | 1 | 86    | 22.54 | 1.2  | 26   | 1 | 32.8 | 15.73 | 32.24 | 11.88 | 5.47 |
| 255 | 88 | 1 | 3 | 0 | 91    | 25.70 | 1.2  | 29   | 2 | 27.6 | 20.02 | 52.44 | 23.12 | 7.95 |
| 256 | 60 | 1 | 0 | 1 | 96    | 31.28 | 1.5  | 43.5 | 1 | 34.7 | 30.39 | 57.12 | 26.89 | 9.29 |
| 257 | 59 | 1 | 1 | 1 | 90    | 26.06 | 2    | 34   | 0 | 26   | 18.56 | 52.93 | 22.77 | 8.11 |
| 258 | 71 | 1 | 1 | 1 | 74    | 17.58 | 1.5  | 35   | 1 | 9.3  | 4.55  | 44.08 | 18.76 | 6.61 |
| 259 | 75 | 2 | 0 | 0 | 83    | 26.74 | 1    | 21   | 1 | 43.1 | 25.53 | 33.76 | 13.32 | 5.9  |
| 260 | 63 | 2 | 0 | 0 | 69    | 19.18 | 1.2  | 28   | 0 | 31   | 15.82 | 35.26 | 15.31 | 5.83 |
| 261 | 56 | 2 | 0 | 1 | 87.5  | 28.33 | 1.2  | 16   | 1 | 42.5 | 24.23 | 32.77 | 13.64 | 6.61 |
| 262 | 54 | 2 | 0 | 0 | 71    | 19.84 | 2    | 37   | 0 | 27.4 | 14.40 | 38.20 | 16.87 | 6.28 |
| 263 | 68 | 2 | 0 | 0 | 85.5  | 24.49 | 1.2  | 14   | 1 | 40.1 | 21.30 | 31.87 | 11.40 | 5.17 |
| 264 | 61 | 2 | 0 | 0 | 97    | 32.80 | 1.5  | 22   | 0 | 43.3 | 31.89 | 41.68 | 16.85 | 7.5  |
| 265 | 55 | 2 | 0 | 0 | 70    | 22.18 | 1.5  | 29   | 0 | 40.2 | 22.22 | 33.02 | 14.39 | 5.6  |
| 266 | 74 | 1 | 3 | 0 | 91    | 25.87 | 1.2  | 27.5 | 1 | 33.6 | 23.37 | 46.16 | 19.54 | 7.21 |
| 267 | 62 | 2 | 0 | 0 | 73.5  | 21.59 | 2    | 17   | 1 | 35.8 | 18.41 | 32.96 | 13.19 | 5.56 |
| 268 | 83 | 1 | 3 | 1 | 85    | 21.94 | 1.5  | 26   | 1 | 26.3 | 15.16 | 42.53 | 18.94 | 7.29 |
| 269 | 77 | 1 | 3 | 1 | 96.5  | 26.20 | 1.5  | 28   | 1 | 25   | 17.59 | 52.72 | 24.04 | 9.26 |
| 270 | 55 | 1 | 1 | 1 | 83    | 21.27 | 3    | 40   | 0 |      |       |       |       |      |
| 271 | 58 | 2 | 0 | 1 | 73    | 21.73 | 2    | 21   | 0 | 31   | 16.01 | 35.57 | 14.23 | 5.97 |
| 272 | 55 | 1 | 0 | 1 | 91    | 28.33 | 2    | 49   | 0 | 33   | 25.01 | 50.83 | 22.72 | 8.28 |
| 273 | 65 | 1 | 1 | 0 | 90    | 25.31 | 1    | 45   | 1 | 28.4 | 19.26 | 48.56 | 20.97 | 7.59 |
| 274 | 72 | 2 | 0 | 0 | 85.5  | 27.07 | 1.5  | 22   | 0 | 41.3 | 24.37 | 34.65 | 15.04 | 6.68 |
| 275 | 60 | 2 | 0 | 0 | 77    | 24.63 | 1.5  | 18   | 0 | 33.8 | 17.34 | 33.98 | 14.83 | 6.96 |
| 276 | 73 | 2 | 0 | 0 | 85    | 27.79 | 1.2  | 26   | 0 | 42.1 | 28.03 | 38.52 | 16.48 | 6.89 |
| 277 | 82 | 2 | 0 | 0 | 93    | 23.95 | 1.2  | 16   | 2 |      |       |       |       |      |
| 278 | 51 | 1 | 0 | 1 | 82    | 23.86 | 3    | 48   | 0 | 17.7 | 10.37 | 48.30 | 21.81 | 8.57 |
| 279 | 73 | 1 | 1 | 0 | 87    | 24.83 | 1.2  | 38   | 1 | 30.6 | 20.26 | 45.89 | 18.77 | 6.84 |
| 280 | 72 | 1 | 1 | 0 | 91.5  | 25.87 | 1.5  | 29.5 | 1 | 31.7 | 21.34 | 46.01 | 19.42 | 7.29 |
| 281 | 56 | 1 | 1 | 1 | 76    | 19.17 | 2    | 41   | 0 | 14   | 7.47  | 45.86 | 19.30 | 6.86 |
| 282 | 72 | 2 | 0 | 0 | 86    | 26.96 | 0.43 | 10   | 2 | 42.3 | 26.72 | 36.41 | 14.79 | 6.31 |
| 283 | 64 | 1 | 1 | 1 | 84    | 24.15 | 2    | 42   | 0 | 20.4 | 13.48 | 52.50 | 22.82 | 8.15 |
| 284 | 90 | 1 | 1 | 0 | 81    | 21.10 | 1.2  | 19   | 2 | 19.3 | 10.43 | 43.61 | 18.38 | 7.26 |
| 285 | 60 | 2 | 0 | 0 | 66    | 22.23 | 1.5  | 16.5 | 1 | 32.1 | 13.98 | 29.61 | 12.07 | 5.93 |
| 286 | 78 | 1 | 1 | 0 | 93    | 24.46 | 1.5  | 35   | 0 | 26.9 | 19.86 | 53.99 | 25.34 | 8.16 |
| 287 | 65 | 2 | 0 | 0 | 77    | 22.92 | 1.5  | 20   | 0 | 33.1 | 18.39 | 37.15 | 15.82 | 6.59 |

|     |    |   |   |   |      |       |      |      |   |      |       |       |       |      |
|-----|----|---|---|---|------|-------|------|------|---|------|-------|-------|-------|------|
| 288 | 75 | 1 | 3 | 0 | 76   | 18.97 | 1.5  | 31   | 0 | 9.2  | 4.58  | 45.00 | 18.96 | 7.21 |
| 289 | 86 | 1 | 1 | 0 | 85.5 | 23.62 | 1.2  | 38   | 1 | 28.6 | 17.02 | 42.53 | 19.02 | 7.33 |
| 290 | 66 | 2 | 0 | 0 | 84.5 | 25.51 | 1    | 25   | 1 | 40.6 | 25.22 | 36.98 | 14.82 | 6.06 |
| 291 | 70 | 1 | 1 | 0 | 81   | 24.00 | 1.5  | 41   | 0 | 13.8 | 9.66  | 60.25 | 26.60 | 8.93 |
| 292 | 58 | 2 | 0 | 1 | 81   | 24.63 | 1.5  | 27   | 1 | 31   | 18.06 | 40.15 | 17.75 | 7.4  |
| 293 | 60 | 2 | 0 | 1 | 73   | 23.23 | 1.5  | 22   | 1 | 43.9 | 24.07 | 30.77 | 12.47 | 5.29 |
| 294 | 53 | 1 | 1 | 1 | 90   | 27.05 | 1.5  | 42   | 1 | 31.1 | 22.00 | 48.64 | 21.38 | 8    |
| 295 | 69 | 1 | 1 | 1 | 99   | 27.37 | 1.5  | 38   | 1 | 34.4 | 25.87 | 49.34 | 21.34 | 7.56 |
| 296 | 72 | 2 | 0 | 0 | 94   | 24.67 | 0.5  | 12   | 2 | 40.2 | 21.91 | 32.63 | 13.04 | 5.91 |
| 297 | 84 | 1 | 1 | 1 | 82.5 | 22.26 | 2    | 32   | 0 | 22.1 | 12.00 | 42.28 | 18.41 | 7.48 |
| 298 | 80 | 2 | 3 | 1 | 73   | 16.07 | 1    | 5    | 2 | 20.3 | 6.52  | 25.65 | 9.53  | 4.64 |
| 299 | 55 | 1 | 1 | 1 | 79   | 20.84 | 2    | 38   | 0 |      |       |       |       |      |
| 300 | 69 | 2 | 0 | 0 | 97   | 34.00 | 1    | 12   | 1 | 45.9 | 32.00 | 37.69 | 15.55 | 7.5  |
| 301 | 76 | 2 | 0 | 1 | 99   | 30.35 | 1.5  | 29   | 1 | 38.5 | 28.88 | 46.09 | 18.19 | 7.36 |
| 302 | 72 | 2 | 0 | 1 | 93.5 | 24.94 | 1.2  | 25   | 0 | 30.8 | 17.84 | 40.05 | 15.13 | 6.61 |
| 303 | 76 | 1 | 1 | 1 | 108  | 27.56 | 1.2  | 30   | 1 | 33.9 | 27.21 | 53.04 | 24.50 | 8.2  |
| 304 | 64 | 2 | 0 | 1 | 86   | 27.79 | 1.5  | 29   | 1 | 37.4 | 24.28 | 40.65 | 17.49 | 7.37 |
| 305 | 63 | 1 | 1 | 1 | 85.3 | 26.82 | 1.5  | 32.5 | 0 | 25.6 | 15.47 | 44.91 | 19.04 | 8.32 |
| 306 | 61 | 2 | 0 | 0 | 74   | 22.40 | 1.5  | 20   | 1 | 30.1 | 14.62 | 34.02 | 14.36 | 6.59 |
| 307 | 56 | 1 | 1 | 1 | 98   | 28.67 | 2    | 44   | 0 | 26.2 | 21.93 | 61.89 | 29.65 | 9.97 |
| 308 | 64 | 1 | 1 | 1 | 106  | 33.25 | 1.5  | 31   | 0 | 35.6 | 31.88 | 57.65 | 27.43 | 9.75 |
| 309 | 83 | 1 | 0 | 0 | 75   | 21.80 | 1.2  | 28   | 1 | 20.2 | 11.12 | 43.81 | 19.23 | 7.51 |
| 310 | 55 | 1 | 0 | 1 | 80.5 | 21.37 | 2    | 38   | 0 | 16.3 | 8.71  | 44.69 | 19.98 | 7.8  |
| 311 | 63 | 1 | 0 | 1 | 92.5 | 25.97 | 1.2  | 42   | 1 | 26.5 | 20.76 | 57.51 | 26.34 | 8.55 |
| 312 | 52 | 2 | 0 | 1 | 86   | 23.89 | 2    | 30   | 0 | 34   | 22.07 | 42.81 | 19.00 | 7.05 |
| 313 | 70 | 1 | 1 | 1 | 103  | 27.86 | 1    | 26   | 1 | 27.7 | 17.65 | 46.09 | 19.33 | 8.25 |
| 314 | 81 | 1 | 0 | 0 | 85   | 24.27 | 1.5  | 29   | 0 | 25.1 | 14.21 | 42.51 | 19.51 | 8.04 |
| 315 | 75 | 2 | 0 | 1 | 80   | 22.42 | 1.5  | 16   | 1 | 34.6 | 15.87 | 30.00 | 12.26 | 6.08 |
| 316 | 72 | 2 | 0 | 0 | 90   | 22.61 | 1.2  | 23   | 0 | 29.1 | 13.67 | 33.28 | 15.68 | 7.36 |
| 317 | 61 | 2 | 0 | 0 | 78   | 20.96 | 1.2  | 23   | 0 | 37.9 | 20.85 | 34.21 | 14.94 | 5.58 |
| 318 | 61 | 1 | 3 | 1 | 83   | 21.27 | 1.5  | 34   | 0 | 21.4 | 13.34 | 48.90 | 21.53 | 7.62 |
| 319 | 90 | 1 | 3 | 0 | 91.5 | 24.78 | 1    | 29.5 | 1 | 26.6 | 17.68 | 48.89 | 20.40 | 7.57 |
| 320 | 56 | 2 | 0 | 0 | 73.5 | 20.99 | 2    | 30   | 0 | 33   | 15.80 | 32.14 | 12.96 | 5.61 |
| 321 | 69 | 1 | 1 | 0 | 97.5 | 23.80 | 1.2  | 17   | 1 | 26.1 | 16.40 | 46.55 | 19.32 | 7.3  |
| 322 | 70 | 1 | 1 | 1 | 85   | 23.29 | 1.5  | 28   | 1 | 21.8 | 12.96 | 46.63 | 20.02 | 7.77 |
| 323 | 64 | 1 | 0 | 0 | 94   | 27.67 | 1.5  | 40   | 0 | 32.5 | 23.70 | 49.25 | 23.59 | 8.85 |
| 324 | 65 | 1 | 0 | 0 | 94   | 26.03 | 1.5  | 34   | 0 | 32.2 | 21.69 | 45.66 | 20.53 | 7.63 |
| 325 | 64 | 1 | 1 | 1 | 89   | 24.57 | 1.5  | 39   | 0 | 20.4 | 13.23 | 51.49 | 22.41 | 8.28 |
| 326 | 63 | 2 | 0 | 0 | 96.5 | 24.52 | 1    | 20   | 2 | 39.3 | 22.45 | 34.60 | 13.53 | 5.84 |
| 327 | 76 | 1 | 3 | 1 | 90.5 | 23.28 | 1.2  | 31   | 1 | 24   | 14.10 | 44.55 | 19.11 | 7.68 |
| 328 | 55 | 1 | 1 | 0 | 82   | 22.15 | 1.5  | 38   | 0 | 16.2 | 9.33  | 48.20 | 19.28 | 7.24 |
| 329 | 59 | 2 | 0 | 1 | 89   | 27.62 | 1.5  | 22   | 0 | 44.3 | 26.86 | 33.78 | 13.19 | 5.98 |
| 330 | 77 | 2 | 0 | 0 | 76   | 21.14 | 1.2  | 16.5 | 2 | 34.6 | 15.90 | 30.02 | 12.75 | 5.88 |
| 331 | 56 | 2 | 0 | 0 | 80   | 24.39 | 1.5  | 22   | 0 | 40.2 | 25.98 | 38.70 | 16.67 | 6.16 |
| 332 | 67 | 1 | 3 | 1 | 93   | 26.75 | 2    | 42   | 0 | 28.8 | 20.97 | 51.95 | 24.10 | 8.75 |
| 333 | 74 | 2 | 0 | 0 | 97   | 28.37 | 1    | 22   | 1 | 41.8 | 30.25 | 42.20 | 17.34 | 6.64 |
| 334 | 67 | 1 | 3 | 0 | 84   | 21.64 | 1.2  | 22   | 1 | 16.9 | 8.57  | 42.11 | 18.50 | 7.56 |
| 335 | 53 | 2 | 0 | 0 | 91   | 27.94 | 1.2  | 23   | 0 | 45.1 | 32.91 | 40.03 | 16.86 | 6.32 |
| 336 | 87 | 2 | 1 | 0 | 68   | 20.60 | 0.6  | 12   | 2 |      |       |       |       |      |
| 337 | 62 | 1 | 0 | 1 | 89   | 23.76 | 2    | 32   | 0 | 24   | 14.94 | 47.45 | 22.04 | 8.19 |
| 338 | 78 | 1 | 3 | 1 | 77   | 19.98 | 1.2  | 26   | 1 | 18.5 | 8.60  | 37.83 | 14.42 | 5.94 |
| 339 | 62 | 2 | 0 | 1 | 95   | 31.87 | 1.2  | 18   | 1 | 43.5 | 28.87 | 37.56 | 16.26 | 7.59 |
| 340 | 73 | 2 | 0 | 0 | 116  | 36.75 | 0.55 | 20   | 1 | 45.1 | 39.83 | 48.55 | 20.87 | 8.52 |
| 341 | 73 | 1 | 3 | 1 | 88   | 23.95 | 2    | 25   | 1 | 28.3 | 17.04 | 43.17 | 18.70 | 7.11 |
| 342 | 63 | 1 | 3 | 1 | 100  | 26.34 | 1.5  | 34   | 0 | 27.3 | 20.21 | 53.75 | 23.18 | 7.92 |
| 343 | 62 | 2 | 0 | 1 | 77   | 21.71 | 2    | 18   | 1 | 28.7 | 14.71 | 36.61 | 15.78 | 6.43 |
| 344 | 60 | 2 | 0 | 0 | 86   | 28.15 | 0.86 | 27.5 | 1 | 47.8 | 29.86 | 32.64 | 13.31 | 5.85 |
| 345 | 76 | 1 | 0 | 1 | 102  | 32.01 | 1    | 20   | 2 | 36.4 | 28.77 | 50.22 | 21.99 | 8.89 |
| 346 | 66 | 1 | 0 | 1 | 100  | 28.81 | 2    | 51.5 | 0 | 33.8 | 25.61 | 50.09 | 22.65 | 8.22 |
| 347 | 81 | 1 | 1 | 0 | 94   | 24.83 | 1    | 26   | 2 |      |       |       |       |      |
| 348 | 81 | 1 | 0 | 0 | 96   | 28.85 | 1    | 35   | 1 |      |       |       |       |      |
| 349 | 83 | 1 | 3 | 1 | 105  | 30.59 | 1.2  | 30   | 1 | 39.7 | 29.86 | 45.38 | 19.87 | 7.77 |
| 350 | 53 | 1 | 0 | 1 | 93   | 29.30 | 2    | 29   | 0 | 33.3 | 25.24 | 50.53 | 21.62 | 8.27 |
| 351 | 61 | 1 | 1 | 1 | 90   | 27.82 | 2    | 35   | 0 | 30.5 | 20.54 | 46.79 | 20.66 | 8.32 |
| 352 | 54 | 2 | 0 | 0 | 95.5 | 30.36 | 1.5  | 29   | 1 | 45.5 | 32.97 | 39.45 | 15.99 | 6.74 |
| 353 | 71 | 1 | 3 | 0 | 104  | 28.97 | 1.5  | 30   | 0 | 32.5 | 24.76 | 51.44 | 23.68 | 8.75 |
| 354 | 72 | 1 | 3 | 0 | 91   | 24.23 | 1.2  | 30   | 1 | 27.6 | 18.14 | 47.57 | 21.88 | 7.9  |
| 355 | 65 | 1 | 3 | 0 | 84   | 23.64 | 1.5  | 43   | 0 | 21.2 | 13.58 | 50.40 | 22.61 | 8.09 |
| 356 | 68 | 1 | 3 | 1 | 82   | 24.51 | 2    | 34   | 0 |      |       |       |       |      |
| 357 | 83 | 1 | 1 | 0 | 74.5 | 19.45 | 1    | 26   | 2 | 15.9 | 8.18  | 43.40 | 18.94 | 7.08 |
| 358 | 82 | 1 | 1 | 0 | 82   | 20.18 | 1    | 24.5 | 1 | 12   | 5.48  | 40.06 | 16.07 | 6.74 |
| 359 | 68 | 2 | 0 | 0 | 90   | 27.21 | 1.2  | 21   | 1 | 40   | 23.19 | 34.81 | 14.51 | 6.81 |

|     |    |   |   |   |       |       |      |      |   |      |       |       |       |      |
|-----|----|---|---|---|-------|-------|------|------|---|------|-------|-------|-------|------|
| 360 | 52 | 1 | 3 | 1 | 84    | 21.29 | 2    | 42   | 1 | 22.7 | 13.84 | 47.14 | 21.63 | 7.16 |
| 361 | 73 | 2 | 0 | 0 | 91    | 25.13 | 1    | 19   | 1 | 40.2 | 23.76 | 35.37 | 14.08 | 5.91 |
| 362 | 67 | 2 | 0 | 0 | 91.5  | 26.67 | 1    | 15   | 1 | 40.6 | 24.03 | 35.13 | 15.08 | 6.66 |
| 363 | 65 | 1 | 3 | 0 | 86    | 22.88 | 1.2  | 31   | 1 | 26.9 | 15.00 | 40.79 | 17.80 | 7    |
| 364 | 79 | 1 | 3 | 1 | 77    | 18.96 | 1    | 21.5 | 1 | 15.2 | 6.49  | 36.13 | 15.68 | 6.27 |
| 365 | 64 | 2 | 0 | 0 | 95.5  | 29.33 | 1.2  | 28   | 1 | 42.9 | 30.28 | 40.34 | 17.67 | 7.28 |
| 366 | 53 | 2 | 0 | 0 | 77    | 21.48 | 1.2  | 30   | 0 | 33.6 | 17.83 | 35.21 | 15.83 | 6.28 |
| 367 | 61 | 2 | 0 | 0 | 73    | 18.23 | 1.5  | 19   | 1 | 23   | 8.97  | 29.96 | 11.61 | 5.12 |
| 368 | 77 | 2 | 0 | 0 | 78    | 20.04 | 1.2  | 19   | 0 | 20.8 | 9.14  | 34.85 | 14.61 | 6.76 |
| 369 | 57 | 1 | 0 | 0 | 77.5  | 23.22 | 1.5  | 36   | 0 | 21.4 | 12.09 | 44.49 | 20.40 | 8.22 |
| 370 | 63 | 2 | 0 | 0 | 90.5  | 25.94 | 1.5  | 26   | 0 | 40.4 | 26.76 | 39.47 | 15.73 | 6.14 |
| 371 | 73 | 2 | 0 | 0 | 82    | 24.11 | 1    | 20   | 1 | 34.9 | 19.79 | 36.94 | 15.39 | 6.53 |
| 372 | 63 | 1 | 3 | 1 | 99    | 28.40 | 2    | 46   | 0 | 29.4 | 24.51 | 58.90 | 27.09 | 9.12 |
| 373 | 63 | 1 | 0 | 1 | 87    | 22.55 | 1.5  | 34   | 0 | 20.7 | 11.68 | 44.88 | 19.70 | 7.69 |
| 374 | 76 | 1 | 1 | 1 | 104.5 | 28.78 | 1.2  | 31   | 1 | 32.8 | 23.07 | 47.38 | 20.20 | 8.16 |
| 375 | 62 | 1 | 1 | 1 | 80    | 23.78 | 1.2  | 29   | 1 | 22.4 | 12.30 | 42.65 | 18.33 | 7.73 |
| 376 | 57 | 1 | 3 | 1 | 93    | 27.05 | 2    | 50   | 0 | 32.2 | 25.59 | 53.89 | 23.69 | 7.85 |
| 377 | 70 | 2 | 0 | 0 | 104   | 34.81 | 1.2  | 20   | 0 | 44.4 | 34.92 | 43.77 | 17.75 | 7.74 |
| 378 | 58 | 1 | 1 | 0 | 71    | 19.94 | 1.5  | 34   | 0 | 8.4  | 4.02  | 43.71 | 19.21 | 8.1  |
| 379 | 61 | 2 | 0 | 1 | 86.5  | 24.97 | 1.2  | 30   | 0 | 38.1 | 22.56 | 36.70 | 15.21 | 6.3  |
| 380 | 52 | 1 | 0 | 1 | 106   | 31.24 | 2    | 40   | 0 | 35.3 | 30.74 | 56.24 | 26.07 | 9.16 |
| 381 | 65 | 1 | 3 | 1 | 83    | 21.91 | 1.5  | 39   | 0 | 14.8 | 7.93  | 45.62 | 20.21 | 7.9  |
| 382 | 53 | 1 | 0 | 1 | 99    | 29.87 | 2    | 45   | 0 | 30.1 | 24.48 | 56.78 | 25.87 | 9.32 |
| 383 | 57 | 1 | 3 | 1 | 115.5 | 38.97 | 2    | 42   | 0 | 37.2 | 36.27 | 61.14 | 22.60 | 8.86 |
| 384 | 75 | 1 | 3 | 0 | 86    | 24.17 | 0.67 | 29   | 1 | 19.9 | 12.67 | 50.92 | 22.89 | 8.51 |
| 385 | 59 | 2 | 0 | 0 | 89    | 26.47 | 2    | 17   | 1 | 41.8 | 22.23 | 30.96 | 12.67 | 5.97 |
| 386 | 73 | 2 | 0 | 1 | 84    | 26.15 | 1.2  | 22   | 0 | 36.3 | 20.38 | 35.75 | 15.37 | 6.9  |
| 387 | 57 | 2 | 0 | 0 | 77    | 25.39 | 1.5  | 28   | 0 | 38.2 | 22.94 | 37.13 | 16.85 | 6.89 |
| 388 | 75 | 2 | 0 | 0 | 93    | 27.05 | 1.2  | 22   | 0 | 37   | 20.95 | 35.70 | 14.55 | 6.62 |
| 389 | 52 | 1 | 1 | 1 | 90    | 22.02 | 1.5  | 28   | 2 | 24.8 | 15.68 | 47.58 | 20.49 | 6.77 |
| 390 | 82 | 1 | 1 | 0 | 88    | 23.65 | 0.6  | 28   | 1 | 22   | 13.00 | 45.97 | 20.63 | 8.08 |
| 391 | 52 | 1 | 1 | 1 | 94    | 25.02 | 1.5  | 35   | 0 | 25.4 | 18.64 | 54.62 | 26.21 | 8.63 |
| 392 | 89 | 1 | 3 | 0 | 74    | 18.96 | 1    | 21.5 | 2 | 15.5 | 7.35  | 40.08 | 17.69 | 6.86 |
| 393 | 73 | 2 | 0 | 0 | 81    | 20.13 | 1.2  | 14   | 1 | 26.1 | 10.33 | 29.30 | 11.73 | 5.74 |
| 394 | 70 | 1 | 1 | 1 | 94.5  | 20.29 | 1.2  | 28   | 1 |      |       |       |       |      |
| 395 | 64 | 1 | 1 | 1 | 80    | 20.90 | 1    | 34   | 1 | 10.3 | 4.77  | 41.38 | 18.09 | 7.72 |
| 396 | 65 | 1 | 1 | 0 | 93    | 29.58 | 2    | 45   | 0 | 30.5 | 25.39 | 57.75 | 27.61 | 9.55 |
| 397 | 83 | 2 | 0 | 0 | 101   | 32.50 | 0.75 | 18   | 2 |      |       |       |       |      |
| 398 | 91 | 1 | 3 | 0 | 96    | 27.24 | 0.67 | 20   | 1 | 16.8 | 9.49  | 46.90 | 20.38 | 9.77 |
| 399 | 77 | 1 | 3 | 0 | 95    | 25.71 | 1    | 20   | 1 | 34   | 21.31 | 41.30 | 17.04 | 6.26 |
| 400 | 65 | 1 | 1 | 0 | 95    | 24.70 | 1.2  | 39   | 1 |      |       |       |       |      |
| 401 | 82 | 1 | 3 | 0 | 90    | 23.42 | 0.86 | 18   | 2 | 21.3 | 12.84 | 47.49 | 21.02 | 7.82 |
| 402 | 58 | 1 | 3 | 1 | 101   | 30.34 | 1.5  | 41   | 1 | 37   | 29.78 | 50.80 | 23.20 | 8.38 |
| 403 | 74 | 1 | 1 | 1 | 81.5  | 22.15 | 2    | 27   | 1 | 23.9 | 13.48 | 42.84 | 18.31 | 6.88 |
| 404 | 55 | 1 | 1 | 1 | 85    | 23.18 | 3    | 40   | 0 | 28.5 | 18.22 | 45.63 | 19.66 | 6.88 |
| 405 | 55 | 2 | 0 | 0 | 93    | 29.41 | 3    | 24   | 0 | 42.5 | 28.67 | 38.72 | 16.73 | 7.2  |
| 406 | 73 | 2 | 1 | 1 | 94    | 31.59 | 1    | 21   | 1 | 44.2 | 28.04 | 35.43 | 14.44 | 7.02 |
| 407 | 63 | 2 | 0 | 0 | 70    | 22.74 | 1.2  | 21   | 0 | 26.3 | 12.96 | 36.24 | 15.61 | 7.13 |
| 408 | 59 | 2 | 0 | 1 | 79    | 23.58 | 2    | 25   | 0 | 33.2 | 16.28 | 32.77 | 13.39 | 6.15 |
| 409 | 57 | 2 | 0 | 0 | 74    | 25.58 | 2    | 24   | 0 | 49.6 | 31.44 | 31.96 | 14.17 | 5.61 |
| 410 | 58 | 2 | 0 | 0 | 102.5 | 30.05 | 0.86 | 20   | 1 |      |       |       |       |      |
| 411 | 79 | 1 | 0 | 0 | 83.5  | 21.16 | 1.2  | 23   | 2 | 17.7 | 8.68  | 40.23 | 17.17 | 7.14 |
| 412 | 53 | 2 | 0 | 1 | 70    | 19.78 | 2    | 22   | 1 | 28.3 | 13.37 | 33.83 | 14.06 | 5.81 |
| 413 | 72 | 2 | 0 | 1 | 97    | 29.35 | 1.2  | 19.5 | 0 | 45.5 | 34.80 | 41.71 | 18.38 | 6.75 |
| 414 | 58 | 1 | 1 | 0 | 88.5  | 26.03 | 1.5  | 32   | 0 |      |       |       |       |      |
| 415 | 54 | 2 | 0 | 0 | 86.5  | 26.87 | 1.5  | 22   | 0 | 36.3 | 22.11 | 38.83 | 16.57 | 7.18 |
| 416 | 83 | 2 | 0 | 0 | 106   | 30.06 | 0.6  | 10   | 1 | 40.5 | 28.58 | 41.99 | 16.97 | 7.03 |
| 417 | 56 | 1 | 0 | 0 | 93    | 26.53 | 2    | 47   | 0 | 26.2 | 19.13 | 54.01 | 24.84 | 8.93 |
| 418 | 59 | 1 | 0 | 1 | 81    | 22.67 | 1.5  | 36   | 1 | 25.3 | 15.70 | 46.27 | 21.78 | 7.88 |
| 419 | 54 | 1 | 1 | 1 | 89    | 24.36 | 1.5  | 40   | 1 | 25   | 15.95 | 47.86 | 20.43 | 7.54 |
| 420 | 57 | 2 | 0 | 0 | 89.5  | 28.54 | 1    | 24   | 1 | 46.6 | 30.21 | 34.55 | 14.63 | 6.18 |
| 421 | 61 | 1 | 3 | 1 | 89    | 24.09 | 1.5  | 42.5 | 0 |      |       |       |       |      |
| 422 | 54 | 2 | 0 | 1 | 69    | 18.18 | 1.2  | 20   | 0 | 25.1 | 10.51 | 31.32 | 13.20 | 5.48 |
| 423 | 59 | 2 | 1 | 1 | 88    | 27.37 | 1.5  | 29   | 0 | 36   | 23.27 | 41.39 | 16.74 | 6.88 |
| 424 | 60 | 2 | 0 | 1 | 99    | 32.89 | 1.2  | 21   | 0 | 48.5 | 36.98 | 39.19 | 15.73 | 6.8  |
| 425 | 58 | 2 | 0 | 1 | 70    | 20.06 | 1.5  | 21   | 0 | 30.8 | 15.47 | 34.78 | 14.55 | 5.73 |
| 426 | 68 | 1 | 3 | 0 | 90    | 25.29 | 1.5  | 37   | 0 | 21.4 | 15.10 | 55.40 | 25.25 | 8.96 |
| 427 | 59 | 1 | 0 | 0 | 95.5  | 30.48 | 2    | 36   | 1 |      |       |       |       |      |
| 428 | 70 | 1 | 1 | 1 | 82    | 21.08 | 1.5  | 34   | 0 | 19.2 | 11.27 | 47.33 | 21.00 | 7.44 |
| 429 | 72 | 1 | 0 | 1 | 90    | 24.10 | 1    | 32   | 1 |      |       |       |       |      |
| 430 | 69 | 2 | 0 | 0 | 86    | 24.29 | 0.67 | 17   | 2 |      |       |       |       |      |
| 431 | 63 | 1 | 3 | 1 | 80    | 23.31 | 1.2  | 44   | 1 | 27.1 | 16.33 | 43.93 | 19.88 | 7.55 |

|     |    |   |   |   |       |       |      |      |   |      |       |       |       |      |
|-----|----|---|---|---|-------|-------|------|------|---|------|-------|-------|-------|------|
| 432 | 58 | 2 | 0 | 0 | 77.5  | 25.02 | 1.5  | 30   | 0 | 38   | 22.34 | 36.44 | 16.35 | 6.76 |
| 433 | 53 | 2 | 0 | 0 | 87    | 28.96 | 1.5  | 24   | 1 | 47.8 | 32.23 | 35.23 | 15.02 | 6.34 |
| 434 | 58 | 1 | 1 | 0 | 95    | 26.12 | 0.86 | 21   | 1 | 33   | 22.39 | 45.46 | 19.73 | 7.44 |
| 435 | 55 | 1 | 1 | 1 | 90    | 25.40 | 1.2  | 40   | 1 | 26.7 | 19.10 | 52.41 | 21.74 | 7.58 |
| 436 | 77 | 2 | 0 | 0 | 77    | 23.56 | 0.86 | 16   | 1 | 30.7 | 14.27 | 32.22 | 12.86 | 6.4  |
| 437 | 81 | 1 | 3 | 1 | 79.5  | 22.05 | 1.5  | 19   | 1 | 21.6 | 11.36 | 41.26 | 17.97 | 7.27 |
| 438 | 71 | 2 | 0 | 0 | 69.5  | 20.48 | 1.5  | 17   | 1 | 24.4 | 11.66 | 36.14 | 15.14 | 6.5  |
| 439 | 66 | 2 | 0 | 0 | 78    | 22.59 | 1.2  | 31.5 | 0 | 34   | 17.63 | 34.30 | 15.19 | 6.41 |
| 440 | 84 | 1 | 3 | 1 | 95    | 26.98 | 1    | 30   | 1 | 34.6 | 21.90 | 41.43 | 17.45 | 7.19 |
| 441 | 58 | 1 | 0 | 0 | 86    | 25.79 | 1.5  | 41   | 0 | 27.8 | 17.93 | 46.58 | 20.91 | 8.32 |
| 442 | 71 | 2 | 0 | 0 | 106   | 28.41 | 0.75 | 14   | 2 | 41.2 | 26.23 | 37.44 | 14.71 | 6.4  |
| 443 | 60 | 1 | 0 | 0 | 83    | 22.97 | 1.5  | 38   | 0 | 19   | 12.48 | 53.12 | 23.69 | 7.76 |
| 444 | 62 | 2 | 0 | 1 | 84    | 28.11 | 1.5  | 21   | 0 | 47.4 | 29.17 | 32.34 | 13.52 | 6.09 |
| 445 | 89 | 1 | 1 | 0 | 92    | 23.87 | 1.2  | 26   | 2 |      |       |       |       |      |
| 446 | 63 | 1 | 3 | 1 | 88    | 27.38 | 1.5  | 39   | 1 | 32.7 | 22.51 | 46.24 | 20.32 | 7.7  |
| 447 | 74 | 2 | 0 | 0 | 71.5  | 20.78 | 1    | 20   | 1 | 31   | 13.55 | 30.15 | 12.27 | 5.72 |
| 448 | 52 | 2 | 1 | 1 | 83    | 26.52 | 1.5  | 20   | 0 | 45.5 | 27.69 | 33.21 | 14.64 | 6.26 |
| 449 | 72 | 2 | 0 | 0 | 82    | 22.58 | 1    | 20   | 1 | 32.9 | 16.19 | 33.03 | 14.57 | 6.53 |
| 450 | 59 | 2 | 0 | 0 | 78    | 27.47 | 1.2  | 25   | 0 | 31.9 | 16.97 | 36.23 | 15.47 | 7.77 |
| 451 | 61 | 2 | 0 | 0 | 79    | 24.14 | 2    | 19   | 0 | 40.1 | 20.63 | 30.83 | 13.15 | 5.96 |
| 452 | 60 | 1 | 0 | 1 | 74    | 19.76 | 3    | 41   | 0 | 18.7 | 9.43  | 41.03 | 18.59 | 7    |
| 453 | 55 | 2 | 0 | 1 | 83    | 27.16 | 3    | 35   | 0 | 42.9 | 24.53 | 32.62 | 13.78 | 6.29 |
| 454 | 79 | 1 | 1 | 1 | 104   | 25.76 | 0.86 | 31   | 1 | 33.3 | 24.85 | 49.84 | 22.79 | 7.62 |
| 455 | 56 | 2 | 0 | 1 | 86.5  | 29.32 | 1.5  | 30   | 1 | 39.4 | 25.25 | 38.85 | 16.01 | 7.21 |
| 456 | 64 | 1 | 0 | 1 | 81    | 24.77 | 1.5  | 42   | 1 | 19   | 12.76 | 54.42 | 25.18 | 9.04 |
| 457 | 57 | 1 | 1 | 1 | 86.5  | 25.56 | 1.5  | 29   | 0 | 25.5 | 18.27 | 53.27 | 23.19 | 8.05 |
| 458 | 75 | 2 | 0 | 1 | 84.5  | 24.31 | 0.86 | 20   | 1 | 38.8 | 22.68 | 35.85 | 14.42 | 5.68 |
| 459 | 72 | 1 | 0 | 0 | 75    | 20.81 | 1.5  | 34   | 0 | 25.6 | 13.32 | 38.75 | 17.81 | 6.81 |
| 460 | 58 | 2 | 0 | 0 | 74.5  | 24.09 | 1.2  | 12   | 1 | 46.4 | 22.98 | 26.55 | 11.62 | 5.49 |
| 461 | 59 | 1 | 0 | 1 | 95.5  | 28.78 | 2    | 36   | 0 | 27.6 | 20.75 | 54.57 | 26.80 | 9.97 |
| 462 | 56 | 1 | 1 | 1 | 76.5  | 20.77 | 2    | 44   | 1 | 19.4 | 10.83 | 45.06 | 20.21 | 7.33 |
| 463 | 63 | 2 | 1 | 1 | 95    | 27.79 | 2    | 20   | 0 | 38.9 | 25.27 | 39.66 | 16.50 | 7.26 |
| 464 | 51 | 1 | 1 | 1 | 86    | 26.03 | 3    | 46   | 0 | 26.6 | 20.12 | 55.47 | 24.95 | 8.43 |
| 465 | 53 | 2 | 0 | 1 | 77    | 21.45 | 2    | 25   | 0 | 36.2 | 18.47 | 32.62 | 14.13 | 5.76 |
| 466 | 66 | 2 | 0 | 1 | 81.5  | 22.51 | 1    | 26   | 1 | 34.8 | 18.60 | 34.85 | 14.56 | 5.96 |
| 467 | 54 | 2 | 0 | 1 | 78    | 24.04 | 2    | 33   | 0 | 37.3 | 21.75 | 36.63 | 16.19 | 6.48 |
| 468 | 58 | 2 | 0 | 0 | 90    | 27.37 | 1.5  | 25   | 0 | 42.4 | 28.48 | 38.67 | 16.28 | 6.5  |
| 469 | 57 | 2 | 0 | 0 | 71    | 21.67 | 2    | 20   | 0 | 33.1 | 17.04 | 34.50 | 13.24 | 5.47 |
| 470 | 61 | 1 | 3 | 0 | 105.6 | 31.76 | 1.5  | 35   | 0 | 34.4 | 28.51 | 54.30 | 22.61 | 8.49 |
| 471 | 53 | 1 | 3 | 1 | 87    | 27.96 | 2    | 59   | 0 | 20.9 | 17.39 | 65.81 | 29.53 | 9.91 |
| 472 | 72 | 1 | 0 | 0 | 115.5 | 30.23 | 0.75 | 29   | 2 | 36.7 | 28.20 | 48.55 | 21.65 | 8.06 |
| 473 | 55 | 2 | 0 | 0 | 78.5  | 21.22 | 1.5  | 28   | 0 | 37.7 | 18.74 | 30.94 | 13.37 | 5.44 |
| 474 | 68 | 2 | 1 | 0 | 72.5  | 20.93 | 1.5  | 23   | 1 | 26.8 | 11.94 | 32.56 | 12.49 | 5.63 |
| 475 | 63 | 2 | 0 | 1 | 90    | 29.90 | 1.5  | 18   | 0 | 42.3 | 25.85 | 35.24 | 14.41 | 6.95 |
| 476 | 67 | 1 | 3 | 0 | 75.5  | 22.50 | 1.5  | 37   | 0 | 19.4 | 10.27 | 42.61 | 19.26 | 7.86 |
| 477 | 78 | 1 | 3 | 1 | 81    | 18.88 | 1.2  | 25   | 1 | 20.3 | 9.93  | 38.93 | 15.97 | 6.87 |
| 478 | 59 | 2 | 0 | 0 | 87.5  | 26.97 | 1.5  | 22   | 0 | 36.7 | 25.18 | 43.34 | 18.86 | 7.28 |
| 479 | 68 | 2 | 0 | 0 | 85    | 26.34 | 1.2  | 20   | 1 | 42.1 | 25.36 | 34.85 | 14.52 | 6.22 |
| 480 | 57 | 1 | 3 | 1 | 104   | 32.22 | 1.5  | 43   | 0 | 36.2 | 32.13 | 56.66 | 25.39 | 8.92 |
| 481 | 58 | 1 | 0 | 1 | 86    | 25.54 | 2    | 43   | 0 | 18.3 | 13.01 | 58.24 | 25.75 | 9.14 |
| 482 | 57 | 2 | 0 | 0 | 78.5  | 23.96 | 1.2  | 20   | 1 | 42.8 | 21.99 | 29.42 | 11.72 | 5.45 |
| 483 | 79 | 2 | 0 | 0 | 75    | 21.24 | 0.67 | 13   | 2 | 28   | 14.07 | 36.12 | 14.92 | 6.22 |
| 484 | 70 | 1 | 0 | 0 | 93    | 26.50 | 1    | 32   | 1 | 31.7 | 23.13 | 49.75 | 23.12 | 8.29 |
| 485 | 79 | 1 | 1 | 0 | 96    | 26.70 | 0.75 | 19   | 1 | 25.4 | 16.84 | 49.45 | 20.76 | 8.21 |
| 486 | 69 | 1 | 0 | 0 | 81    | 23.31 | 2    | 30   | 0 | 24.2 | 13.74 | 42.93 | 19.46 | 7.87 |
| 487 | 78 | 1 | 3 | 1 | 67.5  | 17.32 | 1    | 25   | 1 | 14.2 | 6.02  | 36.22 | 12.81 | 4.79 |
| 488 | 71 | 2 | 0 | 1 | 67    | 17.04 | 0.75 | 14   | 2 | 21.9 | 8.15  | 29.08 | 11.52 | 5.1  |
| 489 | 53 | 1 | 0 | 1 | 88    | 25.14 | 2    | 53   | 1 | 17.8 | 12.36 | 56.94 | 26.27 | 9.34 |
| 490 | 52 | 2 | 0 | 0 | 95    | 34.46 | 1.5  | 24   | 0 | 47.4 | 37.27 | 41.35 | 17.60 | 7.68 |
| 491 | 56 | 2 | 0 | 0 | 73    | 21.91 | 1.5  | 19   | 0 | 40.5 | 21.02 | 30.88 | 13.03 | 5.31 |
| 492 | 54 | 1 | 1 | 1 | 77    | 22.25 | 2    | 41   | 0 | 21.5 | 12.18 | 44.39 | 18.39 | 7.01 |
| 493 | 55 | 2 | 0 | 0 | 64    | 19.53 | 1.5  | 22   | 1 | 30.5 | 15.36 | 32.79 | 13.93 | 5.7  |
| 494 | 59 | 2 | 0 | 1 | 76.5  | 23.74 | 1    | 17   | 1 | 33.5 | 18.05 | 35.79 | 14.41 | 6.37 |
| 495 | 63 | 1 | 3 | 1 | 80    | 22.47 | 2    | 41   | 0 | 18.5 | 11.28 | 49.70 | 22.34 | 8.1  |
| 496 | 56 | 2 | 0 | 0 | 91    | 33.73 | 1.5  | 25   | 1 | 51   | 39.78 | 38.24 | 16.00 | 6.72 |
| 497 | 72 | 2 | 0 | 0 | 77    | 25.01 | 1.2  | 16   | 1 | 36.1 | 18.76 | 33.17 | 14.20 | 6.69 |
| 498 | 53 | 1 | 1 | 1 | 82    | 24.15 | 2    | 42   | 0 | 27.2 | 17.38 | 46.53 | 20.83 | 7.58 |
| 499 | 52 | 2 | 0 | 0 | 84.5  | 26.77 | 2    | 24   | 0 | 44.7 | 29.12 | 36.04 | 15.92 | 6.36 |
| 500 | 59 | 2 | 0 | 1 | 70    | 23.40 | 1.5  | 25   | 1 | 33.3 | 17.67 | 35.34 | 14.88 | 6.39 |
| 501 | 52 | 2 | 0 | 0 | 98    | 34.47 | 2    | 21   | 0 | 46.9 | 37.57 | 42.56 | 16.96 | 7.22 |
| 502 | 79 | 2 | 0 | 0 | 99    | 33.32 | 0.55 | 19   | 2 |      |       |       |       |      |
| 503 | 63 | 2 | 0 | 0 | 80    | 26.21 | 1    | 21   | 1 | 38.7 | 22.62 | 35.88 | 14.83 | 6.57 |

|     |    |   |   |   |      |       |      |      |   |      |       |       |       |      |
|-----|----|---|---|---|------|-------|------|------|---|------|-------|-------|-------|------|
| 504 | 53 | 2 | 0 | 0 | 74   | 25.27 | 1    | 21   | 2 | 39.4 | 23.46 | 36.08 | 16.04 | 6.67 |
| 505 | 76 | 1 | 3 | 0 | 89   | 23.96 | 1.5  | 33   | 1 | 31.4 | 20.71 | 45.21 | 19.20 | 6.58 |
| 506 | 64 | 1 | 3 | 1 | 92   | 24.87 | 1.5  | 45   | 0 | 29.1 | 20.61 | 50.33 | 22.91 | 7.88 |
| 507 | 57 | 1 | 1 | 1 | 71.5 | 22.84 | 1.5  | 45   | 0 | 10.6 | 7.13  | 60.15 | 28.03 | 9.29 |
| 508 | 63 | 2 | 0 | 0 | 78.5 | 25.05 | 1.2  | 22   | 0 | 41.6 | 25.72 | 36.05 | 16.34 | 6.5  |
| 509 | 54 | 1 | 1 | 0 | 80.5 | 22.34 | 1.5  | 29   | 0 | 27   | 15.38 | 41.54 | 18.33 | 7.04 |
| 510 | 57 | 1 | 1 | 1 | 98   | 27.84 | 2    | 38   | 0 | 33.9 | 25.38 | 49.44 | 20.94 | 7.58 |
| 511 | 58 | 1 | 3 | 1 | 99   | 32.12 | 1    | 25   | 2 | 33.8 | 27.87 | 54.56 | 23.32 | 8.9  |
| 512 | 62 | 2 | 0 | 0 | 94   | 28.43 | 1.5  | 38   | 0 | 38.7 | 27.53 | 43.52 | 17.81 | 6.97 |
| 513 | 61 | 2 | 0 | 0 | 86.5 | 24.72 | 1.5  | 17   | 1 | 42.4 | 21.99 | 29.90 | 12.24 | 5.74 |
| 514 | 57 | 2 | 0 | 1 | 70   | 19.70 | 2    | 18   | 0 | 29.5 | 13.03 | 31.12 | 13.60 | 5.98 |
| 515 | 74 | 1 | 3 | 1 | 97   | 26.99 | 1.5  | 33   | 0 | 26.6 | 19.29 | 53.10 | 23.66 | 8.72 |
| 516 | 54 | 2 | 0 | 0 | 76   | 21.42 | 1.2  | 29   | 1 | 34.6 | 19.20 | 36.28 | 16.60 | 6.3  |
| 517 | 60 | 2 | 0 | 0 | 71   | 22.33 | 2    | 24   | 0 | 31.1 | 15.78 | 35.05 | 15.49 | 6.71 |
| 518 | 59 | 2 | 0 | 0 | 86   | 25.01 | 2    | 17   | 1 | 36.7 | 25.61 | 44.25 | 20.82 | 7.44 |
| 519 | 51 | 1 | 0 | 1 | 98.5 | 33.33 | 1.2  | 41   | 2 |      |       |       |       |      |
| 520 | 80 | 1 | 0 | 1 | 91.5 | 24.44 | 2    | 29   | 0 | 30.7 | 20.19 | 45.47 | 20.06 | 7.58 |
| 521 | 65 | 1 | 1 | 1 | 78   | 21.58 | 2    | 25   | 1 | 14.4 | 7.12  | 42.33 | 18.75 | 7.49 |
| 522 | 72 | 1 | 3 | 1 | 96   | 26.98 | 1.2  | 28.5 | 1 |      |       |       |       |      |
| 523 | 57 | 2 | 0 | 1 | 71.5 | 18.19 | 2    | 14   | 1 | 29.8 | 11.89 | 27.95 | 11.47 | 5.15 |
| 524 | 74 | 1 | 0 | 1 | 102  | 29.13 | 1    | 37.5 | 1 | 27   | 23.75 | 64.26 | 28.84 | 9.42 |
| 525 | 55 | 1 | 1 | 0 | 88.5 | 25.69 | 2    | 37   | 1 | 23.5 | 16.29 | 53.10 | 24.01 | 8.79 |
| 526 | 85 | 1 | 0 | 1 | 91   | 26.41 | 1.2  | 29   | 1 | 25.5 | 16.76 | 48.85 | 22.40 | 8.82 |
| 527 | 55 | 2 | 0 | 0 | 106  | 35.01 | 1.5  | 26   | 0 | 48.9 | 42.35 | 44.24 | 15.35 | 6.14 |
| 528 | 67 | 1 | 0 | 0 | 89.5 | 25.57 | 0.86 | 27   | 1 | 30   | 19.87 | 46.37 | 20.73 | 7.83 |
| 529 | 60 | 1 | 0 | 1 | 103  | 28.68 | 3    | 42   | 0 | 35.3 | 28.76 | 52.68 | 21.56 | 7.54 |
| 530 | 58 | 1 | 0 | 1 | 85   | 22.00 | 2    | 42   | 1 | 24.4 | 14.69 | 45.61 | 20.52 | 7.34 |
| 531 | 69 | 2 | 0 | 0 | 84   | 24.79 | 1.2  | 25   | 0 | 37.5 | 20.31 | 33.81 | 13.68 | 6.15 |
| 532 | 57 | 1 | 1 | 0 | 79   | 21.84 | 1.2  | 27.5 | 2 | 21.5 | 12.21 | 44.50 | 17.53 | 6.42 |
| 533 | 65 | 1 | 1 | 1 | 80   | 22.94 | 2    | 36   | 0 | 23.2 | 13.85 | 45.79 | 20.45 | 7.6  |
| 534 | 69 | 1 | 1 | 0 | 89   | 25.88 | 1.5  | 36   | 0 | 26.3 | 16.84 | 47.17 | 19.70 | 7.78 |
| 535 | 60 | 2 | 0 | 1 | 83.5 | 24.62 | 2    | 32   | 1 | 33.4 | 18.31 | 36.54 | 16.41 | 7.25 |
| 536 | 55 | 2 | 0 | 1 | 74   | 21.72 | 1.5  | 18   | 0 | 36.2 | 18.45 | 32.56 | 13.69 | 6.02 |
| 537 | 56 | 2 | 0 | 0 | 95.5 | 28.08 | 1.5  | 22   | 0 | 44.4 | 27.73 | 34.78 | 14.85 | 6.3  |
| 538 | 70 | 2 | 0 | 0 | 84.5 | 21.20 | 1.2  | 15   | 1 | 36   | 17.54 | 31.15 | 12.98 | 5.58 |
| 539 | 64 | 2 | 0 | 0 | 77.5 | 24.18 | 1.2  | 23   | 1 | 39.5 | 20.10 | 30.83 | 13.17 | 6.22 |
| 540 | 59 | 2 | 0 | 1 | 79   | 23.24 | 1.2  | 21   | 0 | 40.8 | 23.64 | 34.28 | 14.27 | 5.74 |
| 541 | 80 | 2 | 0 | 0 | 73   | 18.77 | 1.2  | 20   | 0 | 28.3 | 12.07 | 30.62 | 12.60 | 5.38 |
| 542 | 71 | 1 | 1 | 0 | 86   | 23.33 | 2    | 36   | 1 | 21.4 | 11.53 | 42.28 | 18.72 | 8.03 |
| 543 | 75 | 1 | 0 | 0 | 97   | 30.61 | 1.5  | 19   | 1 | 36   | 26.15 | 46.55 | 20.75 | 8.54 |
| 544 | 52 | 1 | 3 | 0 | 78.5 | 20.49 | 2    | 47   | 0 | 14   | 8.58  | 52.57 | 23.89 | 7.95 |
| 545 | 62 | 2 | 0 | 0 | 64   | 20.69 | 1.5  | 24   | 1 | 32.7 | 15.16 | 31.20 | 13.08 | 5.78 |
| 546 | 74 | 2 | 0 | 0 | 82   | 27.30 | 1    | 19   | 1 | 34.9 | 18.61 | 34.70 | 14.14 | 7.12 |
| 547 | 54 | 1 | 0 | 0 | 92.5 | 26.15 | 1.5  | 25   | 1 | 34.7 | 25.53 | 47.94 | 22.55 | 7.83 |
| 548 | 68 | 2 | 0 | 0 | 78.5 | 21.27 | 1.5  | 31   | 0 | 31.8 | 16.49 | 35.38 | 15.25 | 6.06 |
| 549 | 52 | 2 | 0 | 0 | 63   | 19.70 | 1.2  | 31   | 0 | 29.5 | 13.34 | 31.93 | 13.08 | 5.46 |
| 550 | 52 | 1 | 0 | 1 | 92   | 28.95 | 3    | 47   | 0 | 32.8 | 26.30 | 53.77 | 24.67 | 8.76 |
| 551 | 54 | 2 | 0 | 1 | 70   | 18.79 | 2    | 31   | 1 | 27.7 | 13.38 | 34.91 | 15.23 | 6.02 |
| 552 | 75 | 1 | 0 | 0 | 78   | 22.28 | 0.86 | 28   | 1 |      |       |       |       |      |
| 553 | 71 | 1 | 1 | 1 | 83   | 22.55 | 1.5  | 26   | 1 | 22.6 | 12.17 | 41.57 | 17.56 | 7.32 |
| 554 | 67 | 1 | 1 | 0 | 84   | 23.54 | 1    | 34   | 1 | 21.8 | 13.73 | 49.09 | 21.90 | 8.14 |
| 555 | 86 | 1 | 0 | 0 | 95   | 25.60 | 2    | 30   | 0 | 38.5 | 27.25 | 43.61 | 18.30 | 6.49 |
| 556 | 58 | 1 | 0 | 1 | 81.5 | 21.75 | 1.5  | 50   | 0 | 22.3 | 13.08 | 45.58 | 20.79 | 7.6  |
| 557 | 59 | 2 | 0 | 0 | 84.5 | 24.73 | 1.5  | 32   | 0 | 35.3 | 22.57 | 41.36 | 19.30 | 7.41 |
| 558 | 71 | 1 | 0 | 0 | 96   | 25.09 | 2    | 23   | 1 | 24.5 | 17.94 | 55.26 | 24.09 | 8.13 |
| 559 | 63 | 1 | 0 | 1 | 77.5 | 23.79 | 1.2  | 38   | 1 | 17.2 | 10.26 | 49.56 | 21.11 | 7.58 |
| 560 | 76 | 2 | 0 | 0 | 100  | 34.39 | 1    | 17   | 2 | 44   | 30.80 | 39.17 | 13.46 | 6.45 |
| 561 | 62 | 1 | 0 | 0 | 84   | 27.65 | 1.2  | 43   | 1 | 29.6 | 19.02 | 45.35 | 17.32 | 7.06 |
| 562 | 59 | 2 | 0 | 0 | 69   | 20.45 | 1.5  | 18   | 0 | 33.8 | 17.67 | 34.61 | 14.97 | 5.78 |
| 563 | 79 | 1 | 1 | 0 | 71.5 | 19.61 | 1.5  | 28   | 1 | 16.1 | 7.72  | 40.31 | 17.31 | 6.83 |
| 564 | 59 | 2 | 0 | 1 | 78   | 22.52 | 1.5  | 24   | 0 | 45.9 | 25.11 | 29.56 | 13.03 | 5.26 |
| 565 | 74 | 2 | 0 | 0 | 89   | 25.88 | 1    | 23   | 1 | 38   | 25.62 | 41.80 | 19.54 | 7.44 |
| 566 | 54 | 1 | 0 | 1 | 86   | 22.91 | 3    | 47   | 0 | 15.9 | 10.70 | 56.73 | 27.21 | 9.21 |
| 567 | 84 | 2 | 0 | 0 | 93   | 25.13 | 0.5  | 16   | 2 | 32.1 | 17.93 | 37.99 | 16.00 | 7.25 |
| 568 | 69 | 1 | 0 | 1 | 84   | 22.51 | 1.5  | 41   | 0 | 17.9 | 12.84 | 58.90 | 25.86 | 8.01 |
| 569 | 71 | 2 | 0 | 1 | 82   | 24.30 | 1    | 18   | 1 | 32.5 | 16.24 | 33.78 | 14.25 | 6.84 |
| 570 | 59 | 2 | 0 | 0 | 70   | 21.77 | 1.5  | 22   | 1 | 35.6 | 16.96 | 30.63 | 12.80 | 5.81 |
| 571 | 69 | 1 | 1 | 1 | 83   | 22.15 | 1.5  | 30   | 0 | 19.4 | 9.64  | 40.08 | 15.21 | 6.67 |
| 572 | 64 | 2 | 1 | 0 | 89   | 27.85 | 1.5  | 20   | 0 | 46.9 | 28.60 | 32.42 | 12.84 | 5.86 |
| 573 | 59 | 1 | 0 | 1 | 100  | 30.39 | 1.5  | 31   | 0 | 39.9 | 27.91 | 42.11 | 18.67 | 7.77 |
| 574 | 63 | 1 | 3 | 1 | 96   | 26.36 | 2    | 35   | 0 | 31.7 | 23.59 | 50.79 | 20.99 | 7.44 |
| 575 | 60 | 2 | 0 | 0 | 78   | 26.54 | 1.2  | 34   | 0 | 43   | 27.19 | 35.97 | 15.76 | 6.43 |



|     |    |   |   |   |      |       |      |      |   |      |       |       |       |       |
|-----|----|---|---|---|------|-------|------|------|---|------|-------|-------|-------|-------|
| 576 | 67 | 1 | 1 | 1 | 98   | 28.55 | 1.5  | 33   | 1 | 31.3 | 21.99 | 48.35 | 19.40 | 7.8   |
| 577 | 50 | 1 | 1 | 0 | 96.5 | 28.34 | 1.5  | 44   | 0 | 33.7 | 28.34 | 55.87 | 24.82 | 8.24  |
| 578 | 62 | 2 | 0 | 0 | 90   | 25.31 | 1.5  | 27   | 1 | 44.7 | 29.48 | 36.45 | 15.73 | 6.06  |
| 579 | 63 | 1 | 1 | 0 | 92   | 25.51 | 1.5  | 27   | 1 | 23.4 | 14.60 | 47.73 | 20.54 | 8.29  |
| 580 | 56 | 1 | 0 | 0 | 91   | 28.55 | 1.5  | 40   | 0 | 26.5 | 20.07 | 55.77 | 28.47 | 10.42 |
| 581 | 56 | 1 | 3 | 0 | 83   | 23.82 | 2    | 50   | 0 | 19.6 | 12.93 | 52.99 | 26.16 | 9.3   |
| 582 | 78 | 1 | 3 | 1 | 69.5 | 18.96 | 2    | 25   | 1 | 16.3 | 7.20  | 37.03 | 15.30 | 6.64  |
| 583 | 59 | 1 | 3 | 0 | 88   | 26.76 | 1.5  | 42   | 0 | 21.8 | 13.16 | 47.28 | 21.42 | 9     |
| 584 | 74 | 1 | 0 | 1 | 84   | 21.04 | 1.2  | 24   | 1 | 21.5 | 12.15 | 44.46 | 18.81 | 6.83  |
| 585 | 54 | 1 | 0 | 0 | 90   | 27.78 | 1.5  | 49   | 0 | 27.5 | 20.44 | 53.80 | 25.39 | 9.43  |
| 586 | 57 | 2 | 1 | 1 | 84.5 | 24.39 | 2    | 26   | 1 | 40.6 | 21.98 | 32.20 | 13.39 | 5.96  |
| 587 | 63 | 2 | 0 | 0 | 79   | 20.75 | 1.5  | 23   | 0 | 35   | 17.93 | 33.35 | 13.48 | 5.42  |
| 588 | 59 | 1 | 0 | 1 | 94   | 25.99 | 2    | 44   | 0 | 25.2 | 18.85 | 56.03 | 24.94 | 8.53  |
| 589 | 66 | 2 | 0 | 0 | 75   | 23.94 | 1.5  | 24   | 0 | 34.2 | 19.91 | 38.36 | 16.48 | 6.69  |
| 590 | 53 | 1 | 1 | 1 | 114  | 33.08 | 1.5  | 46   | 1 | 31.6 | 30.43 | 65.71 | 28.61 | 9.56  |
| 591 | 60 | 1 | 3 | 0 | 97   | 31.09 | 1.5  | 38   | 1 | 29.3 | 22.41 | 54.00 | 24.76 | 9.83  |
| 592 | 55 | 2 | 0 | 0 | 81   | 25.66 | 1.2  | 24   | 0 | 36.7 | 22.24 | 38.37 | 15.25 | 6.37  |
| 593 | 59 | 2 | 0 | 0 | 78.5 | 22.79 | 2    | 31   | 0 | 34.3 | 18.33 | 35.05 | 14.22 | 5.98  |
| 594 | 61 | 2 | 0 | 0 | 69   | 21.37 | 1.2  | 20   | 1 | 33.3 | 15.95 | 31.88 | 13.54 | 6     |
| 595 | 72 | 1 | 3 | 0 | 98   | 27.48 | 1.5  | 34   | 0 | 28.6 | 19.82 | 49.50 | 22.30 | 8.67  |
| 596 | 54 | 2 | 0 | 0 | 79   | 19.88 | 1.5  | 23   | 0 | 28   | 13.31 | 34.15 | 14.44 | 5.96  |
| 597 | 58 | 2 | 0 | 0 | 96.5 | 25.38 | 1.5  | 24   | 0 | 42   | 24.79 | 34.20 | 14.96 | 6.31  |
| 598 | 57 | 2 | 0 | 0 | 84   | 25.36 | 1.2  | 30   | 0 | 30.6 | 17.25 | 39.20 | 17.37 | 7.65  |
| 599 | 59 | 1 | 0 | 0 | 90   | 28.20 | 2    | 41   | 0 | 27.5 | 20.34 | 53.63 | 25.36 | 9.52  |
| 600 | 54 | 1 | 1 | 0 | 76   | 19.51 | 1.5  | 35   | 0 | 17.7 | 8.71  | 40.44 | 16.80 | 6.43  |
| 601 | 68 | 1 | 3 | 0 | 88   | 24.00 | 2    | 22   | 1 | 24.8 | 16.18 | 49.17 | 22.24 | 8.01  |
| 602 | 82 | 1 | 3 | 0 | 96   | 26.56 | 0.67 | 28   | 1 | 32.1 | 19.83 | 41.91 | 19.10 | 8.05  |
| 603 | 81 | 2 | 0 | 0 | 94   | 29.48 | 1.5  | 23   | 0 | 46.5 | 29.37 | 33.75 | 13.63 | 6.18  |
| 604 | 70 | 1 | 1 | 0 | 84   | 23.18 | 1.5  | 43   | 0 | 18.6 | 11.62 | 50.80 | 22.83 | 8.38  |
| 605 | 69 | 1 | 1 | 0 | 97   | 25.70 | 2    | 36   | 0 | 22.1 | 15.34 | 54.08 | 25.20 | 9.13  |
| 606 | 62 | 1 | 3 | 1 | 90   | 26.62 | 1.5  | 44   | 0 | 31.8 | 27.03 | 57.91 | 27.78 | 8.47  |
| 607 | 63 | 1 | 1 | 1 | 74   | 21.65 | 2    | 37   | 0 | 11   | 5.70  | 46.30 | 20.45 | 8.25  |
| 608 | 61 | 2 | 0 | 0 | 70   | 21.66 | 1.5  | 25   | 0 | 32.5 | 15.56 | 32.32 | 13.40 | 5.92  |
| 609 | 61 | 1 | 0 | 1 | 93   | 26.61 | 2    | 41   | 0 | 28.2 | 20.29 | 51.78 | 23.69 | 8.48  |
| 610 | 52 | 2 | 0 | 1 | 91   | 28.09 | 1.5  | 22   | 0 | 40   | 26.61 | 39.87 | 16.71 | 7.03  |
| 611 | 58 | 2 | 0 | 0 | 77   | 23.81 | 1.2  | 18.5 | 0 | 35.7 | 17.45 | 31.50 | 13.23 | 6.1   |
| 612 | 63 | 1 | 3 | 0 | 83   | 23.96 | 2    | 40   | 0 | 27.9 | 16.74 | 43.21 | 18.50 | 7.29  |
| 613 | 67 | 1 | 0 | 1 | 80   | 23.05 | 1.5  | 34   | 0 | 20.5 | 11.90 | 46.18 | 20.49 | 7.81  |
| 614 | 53 | 2 | 0 | 0 | 59   | 18.71 | 1.5  | 20   | 0 | 31.7 | 11.67 | 25.11 | 10.59 | 5.33  |
| 615 | 58 | 1 | 1 | 1 | 99.5 | 31.11 | 2    | 32   | 0 | 33.6 | 23.28 | 45.91 | 19.23 | 8.55  |
| 616 | 74 | 1 | 1 | 0 | 101  | 33.50 | 1.2  | 41   | 1 | 37.8 | 28.63 | 47.10 | 20.21 | 8.36  |
| 617 | 74 | 1 | 0 | 0 | 71   | 19.80 | 1.2  | 36   | 1 | 11.5 | 5.98  | 45.79 | 19.87 | 7.71  |
| 618 | 56 | 1 | 0 | 1 | 100  | 28.54 | 2    | 29   | 0 | 26.4 | 21.51 | 59.92 | 28.67 | 9.99  |
| 619 | 70 | 2 | 0 | 0 | 81   | 25.00 | 1    | 17   | 2 | 36.9 | 22.50 | 38.42 | 17.00 | 6.93  |
| 620 | 78 | 1 | 3 | 0 | 120  | 27.53 | 0.5  | 17   | 2 | 41.5 | 34.10 | 48.01 | 20.95 | 6.82  |
| 621 | 62 | 2 | 0 | 0 | 100  | 29.75 | 2    | 30   | 1 | 41.9 | 32.74 | 45.50 | 19.43 | 7.45  |
| 622 | 57 | 2 | 0 | 0 | 75   | 20.10 | 2    | 30   | 0 | 35.3 | 17.67 | 32.39 | 13.87 | 5.46  |
| 623 | 57 | 2 | 0 | 0 | 74   | 20.44 | 1.2  | 25   | 0 | 35.1 | 17.22 | 31.80 | 13.23 | 5.51  |
| 624 | 53 | 2 | 0 | 1 | 78   | 23.52 | 2    | 28   | 0 | 30.6 | 17.36 | 39.34 | 16.69 | 6.91  |
| 625 | 52 | 1 | 1 | 1 | 93   | 28.01 | 2    | 42   | 1 | 32.1 | 23.73 | 50.16 | 23.26 | 8.73  |
| 626 | 76 | 2 | 0 | 0 | 77   | 22.01 | 1.2  | 19   | 0 | 27.2 | 12.35 | 33.08 | 14.16 | 6.92  |
| 627 | 61 | 2 | 0 | 0 | 80   | 21.50 | 2    | 18   | 0 | 34.7 | 18.28 | 34.46 | 15.13 | 6.14  |
| 628 | 65 | 1 | 0 | 1 | 75   | 22.41 | 2    | 42   | 0 | 21.4 | 12.61 | 46.36 | 20.48 | 7.52  |
| 629 | 92 | 1 | 3 | 0 | 83   | 22.50 | 0.86 | 30   | 1 | 26.1 | 15.18 | 43.06 | 19.42 | 7.45  |
| 630 | 57 | 2 | 0 | 0 | 82   | 20.98 | 2    | 24   | 0 | 35.7 | 18.86 | 33.97 | 15.21 | 5.82  |
| 631 | 68 | 1 | 0 | 0 | 75   | 21.74 | 2    | 42   | 0 | 16.7 | 9.35  | 46.48 | 20.76 | 7.86  |
| 632 | 57 | 2 | 0 | 1 | 85.5 | 24.79 | 1.5  | 17   | 1 | 47.7 | 27.07 | 29.68 | 11.80 | 5.01  |
| 633 | 74 | 1 | 1 | 0 | 98.5 | 29.47 | 1.2  | 32   | 1 | 33.5 | 26.73 | 52.96 | 23.40 | 8.41  |
| 634 | 64 | 1 | 1 | 1 | 77.5 | 20.34 | 2    | 45   | 0 | 19.1 | 11.81 | 50.14 | 21.74 | 6.93  |
| 635 | 54 | 1 | 0 | 0 | 76.5 | 22.04 | 1.5  | 40   | 0 | 18.7 | 9.90  | 43.05 | 19.13 | 7.82  |
| 636 | 57 | 2 | 0 | 0 | 91   | 26.76 | 1.2  | 26   | 1 | 41.7 | 26.92 | 37.66 | 16.86 | 6.86  |
| 637 | 63 | 1 | 0 | 0 | 104  | 31.68 | 0.86 | 32   | 1 | 39.6 | 31.35 | 47.80 | 20.04 | 7.85  |
| 638 | 62 | 2 | 0 | 0 | 73   | 22.24 | 1.2  | 21   | 0 | 35.7 | 19.32 | 34.72 | 13.77 | 5.61  |
| 639 | 55 | 1 | 1 | 0 | 82   | 21.69 | 2    | 43   | 0 | 18.1 | 10.91 | 49.27 | 22.77 | 7.99  |
| 640 | 52 | 2 | 0 | 1 | 95   | 22.69 | 2    | 28   | 0 | 39.9 | 22.42 | 33.71 | 13.74 | 5.44  |
| 641 | 61 | 1 | 1 | 0 | 82   | 24.00 | 1.5  | 32   | 0 |      |       |       |       |       |
| 642 | 61 | 1 | 1 | 1 | 86.5 | 26.02 | 1.5  | 27.5 | 1 | 22.8 | 14.76 | 50.05 | 21.86 | 8.4   |
| 643 | 58 | 1 | 0 | 0 | 72.5 | 23.45 | 1.5  | 38   | 0 | 22.4 | 13.84 | 47.89 | 21.25 | 7.83  |
| 644 | 52 | 1 | 1 | 0 | 84   | 22.09 | 1.5  | 39   | 0 | 25.9 | 14.65 | 41.83 | 18.89 | 7.27  |
| 645 | 62 | 1 | 0 | 1 | 93.5 | 27.81 | 1.5  | 47   | 0 | 27.6 | 21.14 | 55.45 | 24.83 | 8.63  |
| 646 | 62 | 2 | 0 | 0 | 68   | 18.84 | 1.5  | 24   | 0 | 32.1 | 14.01 | 29.60 | 12.65 | 5.32  |
| 647 | 53 | 1 | 0 | 1 | 92   | 25.52 | 1.2  | 44   | 1 | 31.9 | 22.60 | 48.13 | 22.26 | 8     |

|     |    |   |   |   |       |       |      |      |   |      |       |       |       |      |
|-----|----|---|---|---|-------|-------|------|------|---|------|-------|-------|-------|------|
| 648 | 58 | 2 | 0 | 0 | 82    | 24.81 | 1.5  | 22   | 0 | 42.2 | 25.79 | 35.28 | 15.18 | 5.96 |
| 649 | 71 | 2 | 0 | 0 | 86.5  | 23.71 | 1.2  | 17   | 1 | 31.4 | 17.21 | 37.54 | 16.03 | 6.81 |
| 650 | 54 | 2 | 0 | 1 | 85    | 26.23 | 1.5  | 21   | 0 | 38.8 | 25.21 | 39.81 | 16.96 | 6.76 |
| 651 | 58 | 2 | 0 | 0 | 76    | 21.05 | 2    | 23.5 | 0 | 35.1 | 17.24 | 31.92 | 13.41 | 5.67 |
| 652 | 70 | 2 | 0 | 0 | 82    | 26.73 | 1.2  | 19   | 0 | 40.5 | 24.40 | 35.90 | 14.64 | 6.16 |
| 653 | 61 | 1 | 1 | 1 | 86    | 24.51 | 1.5  | 41   | 0 | 23.6 | 14.06 | 45.49 | 19.93 | 7.9  |
| 654 | 83 | 1 | 0 | 0 | 103.5 | 27.32 | 1.5  | 29   | 0 | 35   | 25.08 | 46.66 | 18.72 | 7.2  |
| 655 | 74 | 1 | 1 | 0 | 87    | 24.32 | 1.5  | 37   | 0 | 20.5 | 13.11 | 50.77 | 23.06 | 8.47 |
| 656 | 55 | 2 | 0 | 0 | 94.5  | 32.30 | 1.5  | 21   | 1 | 47.4 | 38.97 | 43.33 | 19.00 | 7.4  |
| 657 | 64 | 1 | 0 | 1 | 91    | 23.57 | 2    | 36   | 0 | 28.1 | 18.22 | 46.74 | 19.66 | 7.43 |
| 658 | 57 | 2 | 0 | 0 | 110.5 | 32.79 | 1.5  | 27   | 1 | 48.7 | 41.53 | 43.77 | 17.91 | 6.77 |
| 659 | 87 | 1 | 3 | 0 | 92.5  | 23.67 | 1    | 28   | 1 | 30.8 | 19.09 | 42.88 | 17.90 | 6.67 |
| 660 | 62 | 2 | 0 | 0 | 79    | 20.46 | 1.5  | 23   | 0 | 28.4 | 12.46 | 31.35 | 11.95 | 5.47 |
| 661 | 61 | 2 | 0 | 0 | 86.5  | 25.54 | 1.5  | 20   | 0 | 40.4 | 23.91 | 35.32 | 14.44 | 6.14 |
| 662 | 57 | 1 | 0 | 1 | 77.5  | 23.59 | 2    | 40   | 0 | 20   | 12.60 | 50.25 | 23.77 | 8.68 |
| 663 | 69 | 1 | 1 | 0 | 105   | 29.55 | 1.5  | 43   | 0 | 33.7 | 28.72 | 56.63 | 23.72 | 8.11 |
| 664 | 55 | 2 | 0 | 0 | 87    | 25.68 | 1.5  | 22   | 0 | 41   | 24.20 | 34.85 | 14.66 | 6.1  |
| 665 | 69 | 1 | 1 | 1 | 91    | 26.58 | 1.2  | 36   | 1 | 24.9 | 17.18 | 51.76 | 22.50 | 8.26 |
| 666 | 67 | 1 | 0 | 0 | 77.5  | 22.44 | 1.5  | 41   | 0 | 13.3 | 7.98  | 52.21 | 24.12 | 8.79 |
| 667 | 71 | 1 | 0 | 1 | 84    | 21.70 | 1.5  | 29   | 0 | 27.9 | 16.45 | 42.58 | 18.43 | 6.51 |
| 668 | 71 | 2 | 0 | 0 | 74.5  | 22.31 | 1.5  | 23   | 0 | 33.9 | 17.27 | 33.63 | 14.43 | 6.42 |
| 669 | 69 | 2 | 0 | 0 | 72    | 21.95 | 1    | 20   | 1 | 37.5 | 17.22 | 28.69 | 11.39 | 5.31 |
| 670 | 71 | 1 | 1 | 1 | 97    | 27.30 | 1.5  | 30   | 1 | 30.4 | 21.77 | 49.95 | 22.24 | 8.15 |
| 671 | 61 | 1 | 3 | 0 | 91    | 26.94 | 1.5  | 46   | 1 | 31.9 | 23.37 | 49.89 | 23.47 | 8.27 |
| 672 | 73 | 2 | 0 | 0 | 113   | 31.69 | 0.6  | 25   | 1 | 44.7 | 33.24 | 41.18 | 16.63 | 7.16 |
| 673 | 55 | 2 | 0 | 0 | 92    | 29.30 | 1.5  | 29   | 0 | 43.7 | 29.42 | 37.86 | 15.51 | 6.55 |
| 674 | 56 | 2 | 0 | 0 | 77.5  | 22.26 | 1.5  | 22   | 0 | 38.2 | 20.24 | 32.77 | 14.28 | 5.88 |
| 675 | 73 | 2 | 0 | 0 | 107   | 32.38 | 1.5  | 15   | 1 | 38.4 | 29.67 | 47.56 | 18.37 | 7.64 |
| 676 | 52 | 1 | 0 | 0 | 82    | 25.67 | 1.5  | 43   | 0 | 28.8 | 19.44 | 47.95 | 22.75 | 8.3  |
| 677 | 54 | 2 | 0 | 0 | 70    | 18.41 | 2    | 30   | 0 | 27.2 | 12.05 | 32.28 | 13.51 | 5.55 |
| 678 | 57 | 1 | 1 | 0 | 81    | 22.78 | 1.2  | 28   | 2 | 18.7 | 11.76 | 51.10 | 22.64 | 7.86 |
| 679 | 64 | 2 | 0 | 0 | 87.5  | 21.18 | 2    | 27   | 0 | 32.7 | 17.62 | 36.28 | 14.08 | 5.56 |
| 680 | 52 | 1 | 0 | 1 | 75    | 22.08 | 1.5  | 33   | 0 | 22.7 | 12.62 | 42.97 | 19.82 | 7.6  |
| 681 | 52 | 1 | 3 | 1 | 98    | 29.27 | 2    | 43   | 0 | 33.1 | 27.49 | 55.68 | 24.65 | 8.53 |
| 682 | 82 | 1 | 3 | 0 | 93    | 23.66 | 0.6  | 15   | 2 | 25.7 | 16.73 | 48.25 | 19.23 | 6.95 |
| 683 | 69 | 1 | 3 | 0 | 80    | 21.26 | 1.5  | 32   | 0 | 7.2  | 3.65  | 46.97 | 19.90 | 8.23 |
| 684 | 58 | 2 | 0 | 0 | 75    | 22.10 | 1.5  | 21   | 0 | 34.8 | 18.80 | 35.23 | 14.31 | 5.74 |
| 685 | 60 | 2 | 1 | 0 | 85.5  | 28.47 | 1.2  | 32   | 0 | 44.1 | 29.28 | 37.05 | 16.59 | 6.76 |
| 686 | 55 | 1 | 1 | 1 | 95.5  | 26.53 | 1.2  | 42   | 1 | 26.8 | 20.79 | 56.64 | 25.82 | 9.76 |
| 687 | 55 | 1 | 3 | 1 | 96    | 30.11 | 1.5  | 40   | 1 | 26.8 | 20.79 | 56.64 | 25.82 | 9.76 |
| 688 | 54 | 1 | 1 | 1 | 78.5  | 21.67 | 3    | 35   | 0 | 15.7 | 9.18  | 49.24 | 22.12 | 7.88 |
| 689 | 59 | 2 | 0 | 0 | 86    | 26.87 | 1.5  | 29   | 1 | 38.7 | 24.97 | 39.62 | 17.47 | 7.12 |
| 690 | 72 | 1 | 0 | 1 | 103   | 26.72 | 1.5  | 30   | 0 | 26.7 | 18.77 | 51.44 | 21.67 | 7.91 |
| 691 | 63 | 1 | 3 | 1 | 98    | 28.66 | 1.5  | 30   | 0 | 33.3 | 26.31 | 52.82 | 21.72 | 7.74 |
| 692 | 77 | 1 | 0 | 0 | 86.5  | 22.70 | 2    | 30   | 0 | 18.3 | 11.24 | 50.22 | 22.39 | 7.83 |
| 693 | 57 | 1 | 1 | 1 | 86    | 25.78 | 2    | 45   | 0 |      |       |       |       |      |
| 694 | 54 | 2 | 0 | 0 | 74    | 18.70 | 1.2  | 21   | 0 | 35.9 | 15.43 | 27.61 | 11.26 | 4.71 |
| 695 | 64 | 2 | 0 | 0 | 88    | 29.36 | 1.2  | 25   | 1 | 37.7 | 24.85 | 41.01 | 16.44 | 7.26 |
| 696 | 56 | 1 | 0 | 0 | 84    | 25.20 | 2    | 38   | 0 | 32.4 | 21.71 | 45.32 | 20.48 | 7.57 |
| 697 | 63 | 1 | 1 | 0 | 97    | 27.52 | 1.5  | 34   | 1 | 32.8 | 22.28 | 45.67 | 20.55 | 8.07 |
| 698 | 54 | 2 | 0 | 0 | 86    | 28.63 | 1.5  | 25   | 0 | 45.3 | 31.62 | 38.26 | 17.24 | 6.85 |
| 699 | 68 | 2 | 0 | 0 | 92    | 23.53 | 1.5  | 17   | 1 | 33.7 | 17.08 | 33.58 | 13.95 | 6.16 |
| 700 | 62 | 2 | 0 | 0 | 82    | 23.19 | 1.5  | 22   | 0 | 38.4 | 19.17 | 30.70 | 13.10 | 5.93 |
| 701 | 54 | 1 | 3 | 1 | 78.5  | 22.48 | 2    | 52   | 0 | 19.4 | 12.01 | 49.84 | 23.55 | 8.24 |
| 702 | 59 | 1 | 1 | 1 | 80    | 21.60 | 1.5  | 37   | 0 | 15.7 | 8.92  | 48.01 | 20.89 | 7.81 |
| 703 | 59 | 1 | 3 | 1 | 99.5  | 29.15 | 1.5  | 47   | 1 |      |       |       |       |      |
| 704 | 61 | 1 | 0 | 1 | 86.5  | 26.14 | 2    | 44   | 1 | 25   | 18.94 | 56.81 | 24.60 | 8.38 |
| 705 | 76 | 2 | 0 | 0 | 66    | 21.55 | 0.75 | 17   | 1 | 38.3 | 16.02 | 25.82 | 9.61  | 4.7  |
| 706 | 57 | 1 | 1 | 1 | 75    | 20.70 | 1.5  | 35   | 1 | 16.5 | 9.10  | 45.92 | 19.97 | 7.4  |
| 707 | 54 | 1 | 0 | 1 | 93    | 27.66 | 2    | 36   | 0 | 27.6 | 18.15 | 47.60 | 20.03 | 8.38 |
| 708 | 85 | 2 | 1 | 0 | 78    | 21.55 | 0.86 | 15   | 2 | 26.8 | 12.10 | 33.02 | 13.29 | 6.43 |
| 709 | 55 | 1 | 1 | 0 | 90    | 26.92 | 2    | 46   | 1 | 26.2 | 19.18 | 53.92 | 24.35 | 8.54 |
| 710 | 66 | 2 | 1 | 0 | 114   | 31.59 | 1.5  | 22   | 0 | 46.1 | 32.75 | 38.35 | 15.38 | 6.71 |
| 711 | 85 | 2 | 0 | 0 | 87    | 21.99 | 0.67 | 13   | 2 | 25.1 | 11.21 | 33.49 | 12.20 | 5.95 |
| 712 | 77 | 2 | 0 | 0 | 98    | 28.38 | 1.5  | 14   | 1 | 35.9 | 22.28 | 39.72 | 16.49 | 7.43 |
| 713 | 74 | 2 | 0 | 0 | 82    | 28.17 | 1.2  | 17   | 1 | 41.9 | 23.88 | 33.16 | 12.99 | 6.26 |
| 714 | 70 | 1 | 3 | 1 | 87    | 25.25 | 1.2  | 30   | 1 | 25   | 15.83 | 47.38 | 20.54 | 7.95 |
| 715 | 72 | 2 | 0 | 0 | 80.5  | 23.49 | 3    | 23   | 0 | 38.6 | 20.24 | 32.25 | 13.70 | 6.02 |
| 716 | 74 | 1 | 3 | 0 | 81    | 22.99 | 1.5  | 36   | 1 | 25.1 | 14.21 | 42.29 | 17.58 | 6.75 |
| 717 | 68 | 2 | 0 | 0 | 86    | 23.78 | 1.5  | 21   | 1 | 42   | 23.55 | 32.46 | 13.19 | 5.4  |
| 718 | 69 | 2 | 0 | 0 | 79.8  | 24.90 | 2    | 18   | 0 | 38.1 | 20.98 | 34.10 | 13.63 | 6.08 |
| 719 | 80 | 2 | 0 | 0 | 74    | 22.69 | 1    | 23   | 1 | 36.8 | 18.61 | 32.00 | 13.26 | 5.88 |

|     |    |   |   |   |       |       |      |    |   |      |       |       |       |      |
|-----|----|---|---|---|-------|-------|------|----|---|------|-------|-------|-------|------|
| 720 | 77 | 2 | 0 | 0 | 82    | 23.71 | 0.67 | 20 | 1 | 33.7 | 17.65 | 34.70 | 13.90 | 6.28 |
| 721 | 79 | 1 | 3 | 0 | 89    | 24.97 | 1.5  | 31 | 1 | 26.8 | 16.62 | 45.41 | 20.77 | 8.1  |
| 722 | 76 | 2 | 0 | 0 | 94    | 27.50 | 1    | 16 | 2 | 42.9 | 24.53 | 32.66 | 14.00 | 6.42 |
| 723 | 71 | 1 | 1 | 1 | 73    | 19.82 | 1.5  | 25 | 1 | 21.7 | 10.35 | 37.30 | 15.39 | 6.45 |
| 724 | 74 | 1 | 1 | 0 | 88    | 24.68 | 2    | 42 | 0 | 28   | 16.92 | 43.60 | 18.47 | 7.3  |
| 725 | 70 | 1 | 3 | 0 | 103   | 26.89 | 1.2  | 19 | 2 | 35.8 | 23.66 | 42.36 | 17.95 | 7.05 |
| 726 | 72 | 2 | 0 | 0 | 85.5  | 26.38 | 1.5  | 26 | 0 | 37.7 | 22.08 | 36.51 | 15.31 | 6.87 |
| 727 | 76 | 1 | 3 | 0 | 90    | 26.70 | 1.5  | 19 | 1 | 32.4 | 21.77 | 45.51 | 19.86 | 7.8  |
| 728 | 79 | 1 | 1 | 0 | 84.5  | 21.87 | 0.75 | 31 | 2 | 21.7 | 12.34 | 44.66 | 18.82 | 7.05 |
| 729 | 70 | 2 | 0 | 0 | 80    | 23.79 | 2    | 17 | 1 | 36.8 | 21.31 | 36.65 | 15.48 | 6.3  |
| 730 | 78 | 1 | 0 | 0 | 95    | 26.77 | 0.6  | 34 | 1 | 32.3 | 22.90 | 48.06 | 21.54 | 7.83 |
| 731 | 73 | 1 | 1 | 1 | 83    | 22.63 | 1.5  | 23 | 1 | 24.8 | 12.37 | 37.60 | 16.17 | 6.83 |
| 732 | 77 | 2 | 0 | 0 | 74    | 19.87 | 0.86 | 11 | 1 | 28.6 | 12.46 | 31.09 | 12.88 | 5.89 |
| 733 | 74 | 2 | 0 | 0 | 101.5 | 26.37 | 1.2  | 20 | 0 | 30.8 | 18.35 | 41.13 | 15.99 | 6.91 |
| 734 | 76 | 1 | 1 | 0 | 88    | 22.97 | 1.2  | 20 | 1 | 24.4 | 14.37 | 44.51 | 19.18 | 7.38 |
| 735 | 69 | 2 | 0 | 0 | 64.5  | 18.77 | 1.5  | 18 | 0 | 17.2 | 7.47  | 36.06 | 14.04 | 6.14 |
| 736 | 73 | 1 | 3 | 1 | 98    | 29.38 | 2    | 34 | 0 | 28   | 21.44 | 55.17 | 25.47 | 9.36 |
| 737 | 68 | 2 | 0 | 0 | 88    | 24.71 | 1.5  | 21 | 0 | 26.6 | 14.79 | 40.90 | 15.61 | 6.65 |
| 738 | 67 | 1 | 3 | 1 | 83    | 24.10 | 1.5  | 42 | 0 | 21.8 | 13.64 | 48.90 | 22.51 | 8.56 |
| 739 | 65 | 2 | 0 | 0 | 71    | 19.81 | 1.5  | 22 | 0 | 31.8 | 14.85 | 31.88 | 13.87 | 5.87 |
| 740 | 78 | 2 | 0 | 0 | 90.5  | 25.11 | 0.86 | 16 | 1 | 43   | 25.14 | 33.36 | 12.87 | 5.44 |
| 741 | 68 | 1 | 1 | 0 | 74.5  | 19.98 | 2    | 29 | 0 | 14.9 | 7.77  | 44.32 | 19.24 | 7.32 |
| 742 | 85 | 1 | 1 | 1 | 81    | 20.30 | 1.5  | 42 | 0 | 13.3 | 8.49  | 55.34 | 25.12 | 7.63 |
| 743 | 77 | 1 | 0 | 0 | 76    | 19.66 | 1.2  | 31 | 1 | 18.5 | 9.09  | 40.17 | 16.47 | 6.21 |
| 744 | 78 | 1 | 3 | 0 | 90    | 26.91 | 1.5  | 37 | 0 | 30.3 | 22.54 | 51.94 | 23.03 | 8.12 |
| 745 | 75 | 2 | 0 | 0 | 82    | 27.31 | 1    | 16 | 1 | 41.7 | 24.58 | 34.39 | 13.81 | 6.43 |
| 746 | 68 | 1 | 0 | 0 | 92    | 24.11 | 3    | 42 | 0 | 28.9 | 20.49 | 50.31 | 21.74 | 7.29 |
| 747 | 76 | 1 | 1 | 1 | 75    | 21.19 | 1    | 25 | 2 | 20.9 | 11.16 | 42.33 | 17.97 | 6.63 |
| 748 | 74 | 1 | 1 | 1 | 91    | 25.13 | 1.2  | 36 | 1 | 33.4 | 21.59 | 43.10 | 19.22 | 7    |
| 749 | 65 | 2 | 0 | 0 | 83    | 24.63 | 2    | 25 | 0 | 36.5 | 20.60 | 35.81 | 15.60 | 6.75 |
| 750 | 74 | 2 | 0 | 0 | 91    | 29.88 | 1    | 22 | 1 | 44.3 | 29.21 | 36.68 | 15.57 | 6.99 |
| 751 | 79 | 1 | 3 | 1 | 90    | 23.95 | 3    | 27 | 1 | 26.9 | 17.15 | 46.56 | 19.33 | 7.22 |
| 752 | 76 | 2 | 0 | 0 | 89    | 24.26 | 1.2  | 24 | 0 | 32.2 | 18.75 | 39.48 | 15.98 | 6.52 |
| 753 | 65 | 2 | 0 | 0 | 88    | 25.09 | 2    | 33 | 0 | 38.7 | 25.44 | 40.35 | 18.00 | 6.79 |
| 754 | 73 | 2 | 0 | 0 | 90    | 22.85 | 1.2  | 21 | 0 | 34   | 17.09 | 33.14 | 13.21 | 5.97 |
| 755 | 72 | 2 | 0 | 0 | 79    | 23.71 | 1.5  | 22 | 0 | 41.4 | 22.64 | 32.09 | 12.96 | 5.75 |
| 756 | 77 | 1 | 1 | 1 | 86    | 24.70 | 1.5  | 31 | 0 | 28.5 | 16.55 | 41.44 | 18.89 | 7.8  |
| 757 | 77 | 1 | 3 | 1 | 97    | 26.40 | 1    | 27 | 2 | 30.4 | 21.41 | 48.98 | 22.82 | 8.33 |
| 758 | 72 | 1 | 1 | 0 | 73    | 19.09 | 2    | 39 | 1 | 16.1 | 7.57  | 39.41 | 16.93 | 6.55 |
| 759 | 72 | 1 | 3 | 1 | 88    | 23.82 | 1.5  | 40 | 0 | 21.4 | 12.47 | 45.85 | 19.70 | 7.82 |
| 760 | 72 | 1 | 0 | 0 | 95    | 22.72 | 1.5  | 36 | 1 | 33.2 | 24.87 | 50.05 | 21.50 | 6.79 |
| 761 | 67 | 1 | 3 | 1 | 80    | 23.85 | 3    | 35 | 0 | 20.7 | 12.45 | 47.70 | 19.71 | 7.84 |
| 762 | 74 | 1 | 0 | 1 | 93    | 25.40 | 1.5  | 34 | 0 | 23   | 15.55 | 52.18 | 22.06 | 7.88 |
| 763 | 70 | 2 | 0 | 0 | 79    | 20.51 | 2    | 25 | 0 | 29.3 | 15.35 | 37.01 | 15.97 | 6.35 |
| 764 | 63 | 2 | 0 | 0 | 78    | 22.15 | 1.5  | 22 | 0 | 30.1 | 15.64 | 36.40 | 14.69 | 6.39 |
| 765 | 69 | 2 | 0 | 0 | 91    | 31.15 | 1.5  | 25 | 0 | 47.5 | 33.29 | 36.78 | 15.39 | 6.75 |
| 766 | 66 | 1 | 1 | 0 | 86    | 25.51 | 3    | 35 | 0 | 26.8 | 18.83 | 51.32 | 23.63 | 8.37 |
| 767 | 80 | 1 | 0 | 0 | 80    | 21.81 | 1.2  | 16 | 1 | 24.4 | 12.14 | 37.64 | 16.67 | 6.97 |
| 768 | 67 | 2 | 0 | 0 | 84    | 26.60 | 1.2  | 16 | 1 | 43   | 27.65 | 36.72 | 16.71 | 6.85 |
| 769 | 79 | 1 | 3 | 0 | 83    | 22.02 | 1.5  | 20 | 1 | 26.2 | 15.71 | 44.29 | 19.55 | 7.29 |
| 770 | 73 | 2 | 0 | 0 | 80    | 22.66 | 1.5  | 15 | 1 | 32   | 17.69 | 37.59 | 16.02 | 6.63 |
| 771 | 71 | 2 | 0 | 0 | 83    | 27.81 | 1.5  | 20 | 0 | 45.9 | 24.80 | 29.23 | 11.62 | 5.93 |
| 772 | 70 | 2 | 0 | 0 | 83.5  | 23.73 | 1    | 24 | 1 | 33.1 | 17.97 | 36.37 | 16.23 | 7.12 |
| 773 | 67 | 2 | 1 | 0 | 90    | 23.16 | 0.86 | 22 | 1 | 33.6 | 15.90 | 31.47 | 12.88 | 6.25 |
| 774 | 68 | 1 | 3 | 0 | 100   | 29.67 | 2    | 22 | 1 | 32.1 | 20.99 | 44.36 | 18.96 | 8.25 |
| 775 | 69 | 1 | 0 | 0 | 88.5  | 27.60 | 1.5  | 35 | 0 | 22.1 | 14.29 | 50.27 | 20.96 | 8.71 |
| 776 | 77 | 1 | 0 | 0 | 87    | 24.96 | 2    | 32 | 0 | 24.1 | 14.95 | 47.11 | 20.35 | 7.95 |
| 777 | 81 | 2 | 0 | 0 | 107   | 32.76 | 0.67 | 15 | 1 | 48   | 30.38 | 32.96 | 13.35 | 6.79 |
| 778 | 75 | 1 | 0 | 0 | 89    | 24.32 | 2    | 28 | 1 | 32.6 | 21.81 | 45.10 | 21.86 | 7.63 |
| 779 | 72 | 1 | 1 | 0 | 79    | 21.29 | 1.5  | 40 | 0 | 15.8 | 8.58  | 45.87 | 18.15 | 6.98 |
| 780 | 72 | 1 | 1 | 0 | 111   | 33.35 | 1.5  | 36 | 1 | 35.2 | 30.34 | 55.75 | 23.86 | 8.88 |
| 781 | 66 | 1 | 1 | 1 | 100   | 25.75 | 2    | 26 | 1 | 34.1 | 26.31 | 50.85 | 23.25 | 7.63 |
| 782 | 81 | 1 | 0 | 0 | 74.5  | 22.26 | 0.75 | 16 | 2 | 23   | 11.54 | 38.75 | 16.32 | 6.97 |
| 783 | 77 | 2 | 0 | 0 | 74    | 19.24 | 1.2  | 10 | 1 | 30.1 | 13.28 | 30.88 | 12.38 | 5.36 |
| 784 | 70 | 1 | 1 | 1 | 86.5  | 23.93 | 1.2  | 32 | 1 | 25.2 | 14.25 | 42.29 | 17.89 | 7.48 |
| 785 | 77 | 1 | 3 | 0 | 77    | 22.21 | 1    | 32 | 1 | 20.2 | 11.45 | 45.14 | 19.78 | 7.51 |
| 786 | 72 | 1 | 1 | 1 | 88    | 25.83 | 1.5  | 37 | 0 | 27.8 | 16.55 | 42.89 | 18.92 | 7.9  |
| 787 | 71 | 2 | 0 | 0 | 71.5  | 22.05 | 1.2  | 19 | 0 | 29.9 | 14.19 | 33.60 | 13.30 | 6.09 |
| 788 | 67 | 2 | 0 | 0 | 85    | 27.66 | 1.5  | 20 | 0 | 44.7 | 25.00 | 30.90 | 11.19 | 5.41 |
| 789 | 83 | 2 | 1 | 0 | 96    | 27.70 | 1    | 13 | 1 | 40.4 | 24.78 | 36.60 | 14.00 | 6.27 |
| 790 | 67 | 1 | 0 | 0 | 86    | 26.63 | 2    | 39 | 0 | 22.1 | 15.25 | 53.64 | 24.04 | 9.16 |
| 791 | 76 | 2 | 0 | 1 | 80    | 22.98 | 1.5  | 25 | 0 | 30.5 | 16.76 | 38.15 | 15.71 | 6.71 |

|     |    |   |   |   |       |       |      |      |   |      |       |       |       |      |
|-----|----|---|---|---|-------|-------|------|------|---|------|-------|-------|-------|------|
| 792 | 74 | 1 | 1 | 0 | 92    | 39.86 | 1.5  | 30   | 1 | 26.8 | 16.54 | 45.17 | 18.57 | 7.55 |
| 793 | 80 | 2 | 0 | 0 | 70    | 17.94 | 2    | 18   | 0 | 20.5 | 9.00  | 34.83 | 13.97 | 5.97 |
| 794 | 76 | 2 | 0 | 0 | 89    | 21.37 | 0.4  | 12   | 2 |      |       |       |       |      |
| 795 | 77 | 2 | 0 | 0 | 92    | 22.80 | 1    | 20   | 1 | 40.1 | 18.27 | 27.30 | 10.44 | 5    |
| 796 | 88 | 2 | 3 | 0 | 99    | 26.64 | 1    | 15   | 2 | 43.3 | 26.63 | 34.94 | 13.99 | 5.86 |
| 797 | 82 | 1 | 3 | 1 | 98    | 26.54 | 1.2  | 22   | 1 | 35.7 | 24.33 | 43.80 | 19.32 | 7.26 |
| 798 | 75 | 1 | 0 | 1 | 78    | 21.38 | 1.2  | 23   | 1 | 25.8 | 13.18 | 37.95 | 16.07 | 6.55 |
| 799 | 76 | 2 | 0 | 0 | 82    | 20.79 | 1.5  | 13   | 1 | 41   | 19.26 | 27.73 | 11.90 | 5.33 |
| 800 | 79 | 2 | 0 | 0 | 92.5  | 26.31 | 1.2  | 19   | 0 | 37.7 | 22.33 | 36.94 | 15.63 | 6.9  |
| 801 | 79 | 2 | 0 | 0 | 97.5  | 28.15 | 1.2  | 16   | 1 | 41.1 | 27.94 | 40.01 | 16.01 | 6.5  |
| 802 | 80 | 2 | 0 | 0 | 82    | 23.62 | 0.55 | 16   | 2 | 36.7 | 18.73 | 32.37 | 12.13 | 5.45 |
| 803 | 72 | 1 | 3 | 0 | 85    | 23.32 | 2    | 30   | 0 | 22.4 | 12.00 | 41.52 | 18.51 | 7.95 |
| 804 | 74 | 2 | 0 | 0 | 102   | 32.45 | 0.86 | 17   | 1 | 52.9 | 38.29 | 34.16 | 12.79 | 5.62 |
| 805 | 66 | 1 | 0 | 0 | 86    | 22.39 | 1.5  | 30   | 0 | 25.4 | 13.53 | 39.64 | 16.99 | 7.02 |
| 806 | 74 | 1 | 1 | 1 | 81    | 20.82 | 1.5  | 31   | 0 | 23.9 | 11.76 | 37.43 | 14.33 | 5.89 |
| 807 | 66 | 2 | 0 | 1 | 85    | 22.51 | 1.5  | 25   | 1 | 36.2 | 18.21 | 32.11 | 12.24 | 5.38 |
| 808 | 67 | 1 | 1 | 0 | 76    | 21.54 | 1.5  | 24   | 2 | 17.3 | 9.93  | 47.56 | 20.03 | 7.31 |
| 809 | 78 | 1 | 0 | 0 | 91    | 24.01 | 1.5  | 24   | 1 | 28.1 | 16.73 | 42.85 | 19.44 | 7.6  |
| 810 | 72 | 2 | 0 | 0 | 83    | 21.94 | 1    | 15   | 1 | 31.7 | 16.78 | 36.16 | 13.62 | 5.76 |
| 811 | 64 | 2 | 0 | 1 | 74.5  | 21.99 | 2    | 23   | 0 | 34.4 | 17.46 | 33.35 | 13.95 | 5.99 |
| 812 | 73 | 1 | 3 | 0 | 85    | 22.10 | 2    | 34   | 0 | 24.2 | 13.90 | 43.43 | 18.23 | 6.8  |
| 813 | 83 | 1 | 3 | 0 | 91.5  | 23.62 | 2    | 28   | 1 | 23.4 | 14.46 | 47.44 | 20.95 | 7.99 |
| 814 | 79 | 2 | 0 | 0 | 94    | 24.55 | 0.29 | 13   | 2 | 27   | 13.47 | 36.44 | 14.50 | 6.86 |
| 815 | 68 | 2 | 0 | 1 | 82    | 24.27 | 2    | 23   | 0 | 36.4 | 20.64 | 36.13 | 14.75 | 6.2  |
| 816 | 73 | 1 | 1 | 0 | 67.5  | 18.97 | 2    | 27   | 1 | 7.6  | 3.89  | 47.43 | 21.18 | 7.52 |
| 817 | 75 | 2 | 0 | 0 | 87    | 20.89 | 1    | 13   | 2 | 30.7 | 14.78 | 33.40 | 13.58 | 5.89 |
| 818 | 76 | 2 | 0 | 0 | 77    | 21.22 | 1    | 19   | 1 | 27.1 | 12.36 | 33.23 | 13.15 | 5.96 |
| 819 | 74 | 1 | 3 | 0 | 94    | 24.75 | 0.86 | 17   | 2 | 27.1 | 18.06 | 48.51 | 19.91 | 7.18 |
| 820 | 70 | 2 | 0 | 0 | 79.5  | 25.25 | 1.2  | 22   | 0 | 36.9 | 23.29 | 39.90 | 17.37 | 6.81 |
| 821 | 73 | 2 | 0 | 0 | 88    | 26.60 | 2    | 23   | 0 | 36.3 | 21.19 | 37.12 | 14.06 | 6.59 |
| 822 | 74 | 1 | 3 | 1 | 86    | 23.98 | 2    | 29   | 0 | 24.3 | 14.32 | 44.54 | 20.04 | 7.88 |
| 823 | 75 | 2 | 0 | 1 | 91    | 23.18 | 1.2  | 23   | 0 |      |       |       |       |      |
| 824 | 80 | 2 | 0 | 0 | 94    | 28.42 | 1    | 20   | 1 | 33.6 | 22.50 | 44.45 | 18.42 | 7.92 |
| 825 | 72 | 2 | 0 | 0 | 78.5  | 38.85 | 1.5  | 16   | 1 | 35.9 | 21.86 | 39.09 | 17.05 | 6.86 |
| 826 | 76 | 2 | 0 | 0 | 82    | 21.02 | 1.2  | 22   | 0 | 28.6 | 13.48 | 33.70 | 13.95 | 6.22 |
| 827 | 87 | 1 | 0 | 0 | 105   | 26.23 | 1.5  | 37   | 0 | 29.4 | 20.81 | 50.08 | 23.17 | 8.5  |
| 828 | 72 | 1 | 3 | 0 | 90    | 24.89 | 2    | 13   | 1 |      |       |       |       |      |
| 829 | 69 | 2 | 0 | 0 | 97    | 34.26 | 1.2  | 17   | 1 | 45.2 | 31.74 | 38.45 | 13.95 | 6.97 |
| 830 | 71 | 1 | 0 | 1 | 87.5  | 25.32 | 1.5  | 33   | 0 | 32.1 | 19.48 | 41.25 | 17.42 | 6.88 |
| 831 | 68 | 2 | 0 | 0 | 94    | 25.32 | 1.5  | 23   | 0 | 34.5 | 23.00 | 43.63 | 19.82 | 7.47 |
| 832 | 77 | 2 | 0 | 0 | 83    | 22.10 | 1.2  | 11   | 1 | 31.3 | 15.41 | 33.81 | 13.27 | 5.89 |
| 833 | 77 | 2 | 0 | 0 | 85    | 26.57 | 1    | 17   | 1 | 36.7 | 19.39 | 33.40 | 10.96 | 5.44 |
| 834 | 82 | 1 | 3 | 0 | 98.5  | 28.02 | 0.86 | 25   | 1 | 33.8 | 22.30 | 43.70 | 19.66 | 8.09 |
| 835 | 65 | 1 | 3 | 1 | 86    | 24.04 | 2    | 44   | 0 | 21.7 | 13.51 | 48.72 | 21.98 | 8.37 |
| 836 | 81 | 1 | 0 | 0 | 83    | 21.50 | 1    | 22   | 2 | 21.1 | 11.02 | 41.16 | 17.71 | 7.16 |
| 837 | 67 | 1 | 0 | 1 | 84    | 22.88 | 2    | 39.5 | 0 | 21.9 | 13.91 | 49.65 | 22.10 | 7.6  |
| 838 | 73 | 1 | 0 | 0 | 84    | 23.24 | 1.5  | 25   | 1 | 27.9 | 16.86 | 43.56 | 19.89 | 7.35 |
| 839 | 66 | 2 | 0 | 0 | 87    | 25.19 | 2    | 22   | 0 | 38.9 | 22.55 | 35.36 | 14.72 | 6.4  |
| 840 | 71 | 2 | 0 | 1 | 103   | 26.01 | 1    | 17   | 1 | 40   | 22.48 | 33.79 | 13.86 | 6.15 |
| 841 | 72 | 1 | 1 | 0 | 94    | 27.11 | 1.2  | 32   | 1 | 29.6 | 21.32 | 50.69 | 21.53 | 8    |
| 842 | 74 | 2 | 0 | 0 | 80    | 24.61 | 1    | 20   | 1 | 33.1 | 17.71 | 35.78 | 15.34 | 7.18 |
| 843 | 72 | 1 | 3 | 1 | 88    | 20.74 | 1.5  | 26   | 1 | 18.6 | 10.01 | 43.94 | 17.95 | 6.86 |
| 844 | 73 | 2 | 0 | 0 | 91    | 25.28 | 0.86 | 13   | 1 | 33.6 | 19.02 | 37.51 | 15.93 | 6.89 |
| 845 | 68 | 1 | 0 | 0 | 80    | 20.85 | 2    | 32   | 0 | 14.1 | 7.83  | 47.86 | 20.41 | 7.45 |
| 846 | 78 | 2 | 0 | 0 | 89    | 23.95 | 1    | 20   | 1 | 35.3 | 19.62 | 36.00 | 15.00 | 6.42 |
| 847 | 69 | 1 | 1 | 0 | 75    | 22.45 | 1.2  | 36   | 1 | 15.6 | 8.68  | 46.96 | 21.03 | 8.44 |
| 848 | 70 | 2 | 0 | 0 | 85    | 19.93 | 1.5  | 22   | 0 | 22.6 | 10.39 | 35.59 | 14.95 | 6.55 |
| 849 | 71 | 1 | 0 | 1 | 99    | 27.47 | 2    | 25   | 1 | 31.9 | 23.62 | 50.53 | 21.49 | 7.79 |
| 850 | 82 | 1 | 3 | 1 | 96    | 25.85 | 1.5  | 28   | 1 | 34.1 | 20.03 | 38.69 | 15.77 | 6.73 |
| 851 | 74 | 2 | 0 | 0 | 81    | 21.27 | 1.2  | 16   | 1 | 24.1 | 9.97  | 31.32 | 13.02 | 6.74 |
| 852 | 65 | 2 | 0 | 1 | 99    | 34.80 | 1.5  | 20   | 0 | 50.4 | 40.01 | 39.44 | 18.29 | 7.91 |
| 853 | 77 | 1 | 1 | 1 | 82    | 22.34 | 1.2  | 28.5 | 1 | 26.9 | 14.39 | 39.01 | 16.43 | 6.53 |
| 854 | 77 | 2 | 0 | 0 | 105.5 | 29.93 | 0.6  | 19   | 1 | 40.9 | 26.82 | 38.79 | 15.27 | 6.84 |
| 855 | 64 | 2 | 0 | 0 | 92    | 29.63 | 1    | 20   | 1 | 40.1 | 27.12 | 40.52 | 15.92 | 6.64 |
| 856 | 62 | 2 | 0 | 0 | 101   | 30.27 | 1.2  | 19   | 0 | 36.9 | 23.42 | 40.02 | 14.74 | 7.05 |
| 857 | 62 | 2 | 1 | 0 | 94    | 28.95 | 1.5  | 20   | 0 | 40.8 | 27.64 | 40.07 | 15.76 | 6.53 |
| 858 | 71 | 2 | 0 | 0 | 81    | 25.40 | 1.5  | 18   | 0 | 33   | 19.35 | 39.32 | 14.50 | 6.14 |
| 859 | 82 | 1 | 1 | 0 | 84.5  | 22.76 | 1.5  | 18   | 1 | 24.3 | 13.91 | 43.43 | 19.00 | 7.33 |
| 860 | 77 | 1 | 3 | 0 | 89    | 27.14 | 3    | 30   | 1 | 31.6 | 22.76 | 49.19 | 20.86 | 7.76 |
| 861 | 70 | 2 | 0 | 0 | 86    | 21.90 | 0.67 | 21   | 1 | 30.4 | 15.54 | 35.53 | 13.31 | 5.81 |
| 862 | 54 | 1 | 1 | 1 | 86    | 25.63 | 2    | 42   | 0 | 26.7 | 18.75 | 51.44 | 22.58 | 8.12 |
| 863 | 76 | 1 | 1 | 0 | 90    | 23.99 | 1    | 22   | 1 | 28.2 | 16.75 | 42.57 | 17.74 | 6.89 |

|     |    |   |   |   |       |       |      |    |   |      |       |       |       |      |
|-----|----|---|---|---|-------|-------|------|----|---|------|-------|-------|-------|------|
| 864 | 76 | 1 | 3 | 0 | 86    | 25.17 | 1.5  | 37 | 1 | 24.5 | 17.23 | 53.05 | 23.46 | 8.17 |
| 865 | 69 | 2 | 0 | 0 | 90.5  | 26.90 | 2    | 22 | 0 | 41.8 | 25.34 | 35.25 | 15.19 | 6.6  |
| 866 | 74 | 2 | 0 | 0 | 79    | 19.82 | 1.5  | 22 | 0 | 34.5 | 19.19 | 36.49 | 14.75 | 5.41 |
| 867 | 66 | 2 | 0 | 0 | 78.5  | 26.30 | 1.2  | 20 | 0 | 37.9 | 20.93 | 34.25 | 12.92 | 6.18 |
| 868 | 61 | 2 | 0 | 1 | 73    | 22.59 | 2    | 28 | 0 | 35   | 18.77 | 34.94 | 14.84 | 6.18 |
| 869 | 71 | 2 | 0 | 0 | 95    | 24.83 | 0.86 | 28 | 1 | 31   | 18.57 | 41.42 | 16.11 | 6.69 |
| 870 | 70 | 1 | 1 | 1 | 93.4  | 25.91 | 1.5  | 32 | 0 | 28.5 | 20.84 | 52.19 | 23.89 | 8.28 |
| 871 | 66 | 1 | 0 | 1 | 83    | 23.22 | 2    | 42 | 0 | 21.3 | 12.97 | 47.81 | 20.77 | 7.89 |
| 872 | 79 | 1 | 0 | 1 | 92    | 25.25 | 1.5  | 20 | 1 | 29   | 18.22 | 44.51 | 18.55 | 7.32 |
| 873 | 75 | 2 | 0 | 1 | 82    | 27.73 | 1.2  | 23 | 0 | 35.5 | 23.20 | 42.16 | 17.69 | 7.55 |
| 874 | 73 | 2 | 0 | 0 | 80    | 24.23 | 2    | 28 | 0 | 37.7 | 21.82 | 36.10 | 15.43 | 6.38 |
| 875 | 76 | 2 | 0 | 0 | 88    | 22.84 | 1    | 26 | 1 | 27.1 | 13.79 | 37.03 | 13.77 | 6.28 |
| 876 | 68 | 1 | 0 | 0 | 94    | 26.76 | 1.2  | 34 | 1 | 26.9 | 17.36 | 47.15 | 21.21 | 8.64 |
| 877 | 70 | 1 | 3 | 0 | 100   | 28.19 | 1.5  | 32 | 0 | 36.4 | 25.82 | 45.11 | 18.86 | 7.29 |
| 878 | 69 | 1 | 0 | 0 | 80    | 21.17 | 3    | 32 | 0 | 19.5 | 10.70 | 44.23 | 20.11 | 7.62 |
| 879 | 60 | 2 | 0 | 0 | 74    | 23.60 | 1.5  | 21 | 1 | 32.8 | 16.39 | 33.58 | 14.03 | 6.64 |
| 880 | 65 | 1 | 1 | 1 | 104.5 | 30.92 | 1.5  | 39 | 0 | 29.9 | 25.54 | 59.82 | 26.78 | 9.28 |
| 881 | 85 | 1 | 3 | 1 | 99    | 31.75 | 1.5  | 35 | 1 | 40.6 | 28.05 | 41.07 | 18.45 | 8.09 |
| 882 | 83 | 2 | 0 | 0 | 74    | 18.91 | 1.5  | 21 | 0 | 29.9 | 12.39 | 29.05 | 11.99 | 5.27 |
| 883 | 60 | 2 | 0 | 1 | 86    | 22.95 | 2    | 28 | 0 | 35.1 | 19.49 | 36.01 | 15.91 | 6.4  |
| 884 | 61 | 1 | 1 | 0 | 90.5  | 28.45 | 2    | 38 | 0 | 31.4 | 24.76 | 54.17 | 24.27 | 8.8  |
| 885 | 62 | 2 | 0 | 0 | 120   | 39.98 | 1    | 17 | 1 | 51.7 | 49.10 | 45.96 | 19.06 | 7.67 |
| 886 | 81 | 1 | 3 | 0 | 91    | 27.98 | 1.5  | 35 | 1 | 30.7 | 20.30 | 45.83 | 21.52 | 8.76 |
| 887 | 75 | 2 | 0 | 0 | 77    | 22.55 | 1    | 16 | 2 | 36   | 18.51 | 32.94 | 13.86 | 6    |
| 888 | 72 | 1 | 3 | 0 | 112   | 28.26 | 2    | 33 | 0 | 34.1 | 24.66 | 47.69 | 20.10 | 7.45 |
| 889 | 67 | 2 | 0 | 0 | 76    | 20.80 | 1.5  | 18 | 0 | 29.4 | 14.67 | 35.31 | 14.90 | 6.19 |
| 890 | 58 | 2 | 0 | 1 | 80    | 22.74 | 2    | 28 | 0 | 39.7 | 20.50 | 31.14 | 12.58 | 5.28 |
| 891 | 74 | 1 | 3 | 0 | 89    | 24.46 | 1.2  | 30 | 1 | 23.9 | 15.04 | 47.98 | 21.01 | 8.06 |
| 892 | 78 | 1 | 0 | 0 | 98    | 23.58 | 1.5  | 31 | 0 | 29.3 | 20.28 | 48.95 | 22.05 | 7.28 |
| 893 | 73 | 2 | 0 | 0 | 110   | 36.14 | 0.86 | 29 | 1 | 48   | 43.15 | 46.77 | 20.32 | 7.89 |
| 894 | 61 | 2 | 0 | 0 | 75.5  | 20.80 | 2    | 27 | 0 | 25.5 | 12.54 | 36.61 | 15.36 | 6.35 |
| 895 | 78 | 2 | 0 | 0 | 83    | 24.03 | 1.5  | 19 | 1 | 41.5 | 21.33 | 30.04 | 11.13 | 5.09 |
| 896 | 72 | 2 | 0 | 0 | 81    | 23.29 | 1.5  | 22 | 1 | 40.7 | 21.80 | 31.81 | 13.53 | 5.57 |
| 897 | 67 | 2 | 0 | 0 | 73    | 23.45 | 2    | 28 | 0 | 38.3 | 19.12 | 30.84 | 12.88 | 5.79 |
| 898 | 66 | 2 | 0 | 0 | 87    | 28.43 | 1.5  | 20 | 0 | 44.8 | 28.13 | 34.63 | 14.77 | 6.47 |
| 899 | 69 | 1 | 3 | 0 | 89    | 25.47 | 1    | 28 | 1 | 23.7 | 15.13 | 48.64 | 20.49 | 7.84 |
| 900 | 74 | 1 | 0 | 1 | 88    | 22.88 | 0.75 | 22 | 1 | 27.8 | 15.77 | 41.05 | 15.97 | 6.04 |
| 901 | 62 | 1 | 1 | 1 | 106.5 | 32.61 | 3    | 31 | 0 | 33   | 26.03 | 52.86 | 23.04 | 9.26 |
| 902 | 76 | 1 | 3 | 0 | 101   | 30.03 | 1.5  | 36 | 0 | 39.2 | 28.43 | 44.15 | 20.00 | 7.85 |
| 903 | 67 | 1 | 1 | 1 | 83    | 20.49 | 2    | 34 | 0 | 10.6 | 5.44  | 45.80 | 19.55 | 7.37 |
| 904 | 64 | 2 | 0 | 0 | 74    | 24.72 | 1.2  | 23 | 0 | 47.9 | 27.41 | 29.80 | 12.12 | 4.96 |
| 905 | 56 | 1 | 1 | 1 | 93    | 26.98 | 2    | 51 | 0 | 34.5 | 27.24 | 51.67 | 22.67 | 7.38 |
| 906 | 71 | 2 | 0 | 0 | 95    | 26.12 | 1.2  | 16 | 1 | 39.5 | 22.11 | 33.87 | 14.27 | 6.55 |
| 907 | 73 | 2 | 0 | 0 | 96    | 20.56 | 1.2  | 15 | 1 | 33   | 17.63 | 35.74 | 14.40 | 5.41 |
| 908 | 78 | 1 | 1 | 0 | 78    | 19.97 | 1    | 24 | 2 | 17   | 8.81  | 42.90 | 17.55 | 6.48 |
| 909 | 77 | 2 | 0 | 0 | 79    | 24.56 | 1.2  | 14 | 1 | 40.6 | 20.86 | 30.57 | 12.41 | 5.86 |
| 910 | 69 | 2 | 0 | 0 | 90    | 27.28 | 1.5  | 22 | 0 | 45.7 | 26.37 | 31.30 | 13.38 | 6.08 |
| 911 | 68 | 2 | 0 | 0 | 87    | 27.63 | 1.5  | 28 | 0 | 42.8 | 31.30 | 41.80 | 18.81 | 7.08 |
| 912 | 70 | 1 | 0 | 0 | 85    | 26.10 | 2    | 40 | 0 | 32.6 | 23.36 | 48.24 | 20.72 | 7.37 |
| 913 | 63 | 2 | 0 | 0 | 92    | 28.83 | 2    | 22 | 0 | 45   | 26.96 | 32.91 | 13.37 | 6.25 |
| 914 | 62 | 2 | 0 | 0 | 86    | 24.95 | 1.5  | 24 | 0 | 35.5 | 19.28 | 35.39 | 14.27 | 6.03 |
| 915 | 71 | 2 | 0 | 0 | 89    | 29.95 | 1.2  | 21 | 0 | 45.6 | 30.72 | 36.60 | 14.91 | 6.45 |
| 916 | 67 | 1 | 1 | 1 | 79    | 19.94 | 2    | 32 | 0 | 18.8 | 9.68  | 41.79 | 17.06 | 6.31 |
| 917 | 59 | 2 | 0 | 0 | 74    | 24.60 | 2    | 28 | 0 | 36.2 | 17.88 | 31.51 | 12.84 | 6.1  |
| 918 | 53 | 2 | 0 | 0 | 84    | 26.90 | 1.5  | 30 | 1 | 38.1 | 23.97 | 38.89 | 17.45 | 7.3  |
| 919 | 61 | 1 | 1 | 0 | 85    | 22.46 | 1.5  | 38 | 0 | 21.6 | 11.97 | 43.44 | 18.13 | 7.12 |
| 920 | 71 | 2 | 0 | 1 | 74    | 23.92 | 1.2  | 22 | 0 | 36.8 | 18.99 | 32.62 | 13.99 | 5.82 |
| 921 | 51 | 2 | 0 | 0 | 76    | 20.49 | 2    | 29 | 0 | 32.4 | 16.70 | 34.91 | 14.58 | 5.58 |
| 922 | 68 | 2 | 0 | 1 | 74    | 20.87 | 2    | 23 | 0 | 28.7 | 13.24 | 32.92 | 13.71 | 6.04 |
| 923 | 77 | 1 | 3 | 1 | 84    | 24.83 | 1    | 30 | 1 | 23   | 13.27 | 44.44 | 20.71 | 8.6  |
| 924 | 72 | 1 | 0 | 0 | 91    | 20.96 | 1.5  | 32 | 0 | 19.2 | 10.84 | 45.62 | 19.83 | 7.07 |
| 925 | 50 | 2 | 0 | 1 | 82    | 24.56 | 2    | 33 | 0 | 31   | 19.41 | 43.19 | 19.72 | 7.4  |
| 926 | 84 | 2 | 0 | 0 | 92    | 25.58 | 1    | 20 | 1 | 40   | 26.10 | 39.16 | 17.73 | 6.89 |
| 927 | 59 | 1 | 0 | 0 | 86    | 25.69 | 1.5  | 40 | 0 | 28.1 | 17.59 | 44.97 | 19.87 | 7.45 |
| 928 | 60 | 1 | 1 | 0 | 100   | 29.91 | 2    | 43 | 1 | 28.4 | 24.82 | 62.54 | 26.25 | 8.8  |
| 929 | 61 | 1 | 0 | 0 | 91    | 28.47 | 3    | 30 | 0 | 22.1 | 15.79 | 55.77 | 24.28 | 9.36 |
| 930 | 58 | 2 | 0 | 1 | 76.5  | 22.02 | 1.2  | 22 | 0 | 33.9 | 18.34 | 35.68 | 14.93 | 5.82 |
| 931 | 59 | 1 | 0 | 0 | 89    | 25.90 | 2    | 40 | 0 | 25.4 | 17.41 | 51.19 | 23.93 | 8.55 |
| 932 | 72 | 1 | 3 | 1 | 86    | 26.07 | 3    | 28 | 1 | 24.6 | 15.01 | 45.90 | 20.10 | 8.24 |
| 933 | 65 | 2 | 0 | 0 | 76    | 22.82 | 1.2  | 19 | 0 | 32.7 | 17.58 | 36.21 | 15.22 | 6.33 |
| 934 | 74 | 1 | 0 | 0 | 91    | 26.06 | 1.2  | 33 | 1 | 27.2 | 18.34 | 48.97 | 21.25 | 7.9  |
| 935 | 78 | 2 | 0 | 0 | 98    | 28.21 | 0.75 | 16 | 2 | 53.2 | 35.45 | 31.21 | 13.38 | 5.8  |

|      |    |   |   |   |       |       |      |    |   |      |       |       |       |        |
|------|----|---|---|---|-------|-------|------|----|---|------|-------|-------|-------|--------|
| 936  | 52 | 1 | 0 | 1 | 94    | 27.42 | 2    | 41 | 0 | 30.9 | 23.07 | 51.53 | 22.30 | 7.51   |
| 937  | 52 | 2 | 0 | 1 | 78.5  | 22.14 | 2    | 22 | 0 | 37.2 | 19.09 | 32.29 | 13.98 | 5.94   |
| 938  | 78 | 2 | 0 | 0 | 84    | 24.39 | 1.5  | 16 | 1 | 33.4 | 16.60 | 33.15 | 12.81 | 6.21   |
| 939  | 78 | 2 | 0 | 0 | 111   | 32.39 | 1.2  | 15 | 1 | 40.4 | 27.42 | 40.52 | 16.43 | 7.62   |
| 940  | 71 | 1 | 1 | 0 | 78    | 24.33 | 1.5  | 46 | 0 | 25.1 | 17.58 | 52.47 | 23.77 | 7.93   |
| 941  | 69 | 2 | 0 | 0 | 93.5  | 24.86 | 3    | 22 | 0 | 36.9 | 20.17 | 34.44 | 14.50 | 6.44   |
| 942  | 61 | 2 | 0 | 0 | 89    | 27.01 | 1.5  | 25 | 0 | 35.5 | 19.65 | 35.77 | 16.10 | 7.71   |
| 943  | 55 | 2 | 0 | 1 | 74.5  | 24.67 | 2    | 25 | 0 | 37.9 | 21.44 | 35.12 | 15.08 | 6.53   |
| 944  | 61 | 2 | 0 | 0 | 77    | 29.34 | 1.2  | 25 | 0 | 41.1 | 26.43 | 37.94 | 16.72 | 7.42   |
| 945  | 51 | 2 | 0 | 0 | 70.5  | 18.15 | 1.5  | 15 | 1 | 30.3 | 13.08 | 30.10 | 13.20 | 5.51   |
| 946  | 79 | 2 | 0 | 0 | 79    | 24.77 | 1    | 18 | 1 | 31.3 | 15.44 | 33.88 | 13.32 | 6.5    |
| 947  | 66 | 2 | 0 | 0 | 96    | 21.79 | 1.5  | 19 | 0 | 39.5 | 22.37 | 34.21 | 14.21 | 5.51   |
| 948  | 55 | 1 | 0 | 0 | 98    | 34.23 | 1.5  | 39 | 0 | 37.8 | 31.51 | 51.96 | 22.08 | 8.79   |
| 949  | 72 | 1 | 0 | 0 | 90.5  | 25.11 | 0.6  | 25 | 1 | 25.6 | 15.72 | 45.62 | 19.71 | 7.81   |
| 950  | 59 | 2 | 0 | 0 | 91    | 28.42 | 1.5  | 24 | 0 | 46   | 31.08 | 36.49 | 15.51 | 6.33   |
| 951  | 62 | 2 | 0 | 0 | 80    | 22.46 | 1.5  | 25 | 0 | 29.2 | 14.68 | 35.62 | 14.87 | 6.44   |
| 952  | 56 | 2 | 0 | 0 | 80    | 22.66 | 3    | 22 | 0 | 31.9 | 19.66 | 41.94 | 18.05 | 6.54   |
| 953  | 57 | 2 | 0 | 0 | 94.5  | 28.30 | 1.5  | 29 | 1 | 49.3 | 34.22 | 35.20 | 17.05 | 6.87   |
| 954  | 59 | 2 | 0 | 1 | 68    | 19.75 | 2    | 30 | 0 | 24.2 | 11.37 | 35.63 | 14.21 | 5.81   |
| 955  | 52 | 2 | 0 | 0 | 80    | 26.02 | 1.5  | 28 | 0 | 34.9 | 23.64 | 44.05 | 20.18 | 7.63   |
| 956  | 64 | 2 | 0 | 0 | 90    | 29.17 | 1    | 21 | 1 | 43.8 | 31.39 | 40.22 | 15.40 | 6.15   |
| 957  | 63 | 2 | 0 | 0 | 74    | 22.16 | 2    | 18 | 0 | 44.8 | 20.94 | 25.83 | 10.26 | 4.88   |
| 958  | 60 | 2 | 0 | 0 | 76    | 20.47 | 2    | 26 | 0 | 37.2 | 20.67 | 34.86 | 15.61 | 5.6    |
| 959  | 56 | 2 | 0 | 0 | 89    | 27.10 | 2    | 21 | 0 | 37.4 | 24.02 | 40.27 | 18.25 | 7.59   |
| 960  | 51 | 1 | 3 | 1 | 85    | 25.98 | 3    | 52 | 0 | 19.7 | 13.94 | 56.85 | 26.85 | 9.5    |
| 961  | 62 | 1 | 3 | 0 | 76    | 17.88 | 1.2  | 27 | 2 | 14.3 | 7.69  | 46.25 | 18.87 | 6.25   |
| 962  | 50 | 2 | 0 | 0 | 85    | 26.93 | 1.5  | 22 | 0 | 37.4 | 24.08 | 40.24 | 16.25 | 6.87   |
| 963  | 60 | 2 | 0 | 1 | 80    | 25.02 | 2    | 29 | 0 | 36.5 | 22.88 | 39.87 | 16.84 | 6.65   |
| 964  | 52 | 2 | 0 | 0 | 74    | 20.96 | 2    | 27 | 0 | 37.7 | 17.60 | 29.12 | 12.61 | 5.55   |
| 965  | 59 | 2 | 0 | 0 | 75    | 19.79 | 1.5  | 16 | 1 | 30.3 | 13.06 | 30.04 | 12.82 | 5.49   |
| 966  | 57 | 2 | 0 | 0 | 97    | 28.19 | 2    | 25 | 0 | 46.7 | 30.87 | 35.26 | 14.73 | 6.05   |
| 967  | 62 | 2 | 0 | 0 | 76    | 22.17 | 3    | 14 | 1 | 38.2 | 20.17 | 32.62 | 13.60 | 5.58   |
| 968  | 53 | 2 | 0 | 0 | 91    | 29.21 | 1.5  | 30 | 0 | 33.9 | 24.15 | 47.18 | 20.09 | 8.15   |
| 969  | 53 | 1 | 3 | 1 | 81    | 26.46 | 2    | 48 | 0 | 22.7 | 15.77 | 53.75 | 25.31 | 9.53   |
| 970  | 51 | 2 | 0 | 0 | 74    | 23.30 | 2    | 30 | 0 | 27.6 | 14.53 | 38.08 | 16.83 | 7.44   |
| 971  | 53 | 1 | 0 | 0 | 88    | 25.95 | 2    | 39 | 0 | 26.5 | 18.11 | 50.18 | 22.98 | 8.62   |
| 972  | 54 | 2 | 0 | 0 | 83    | 26.25 | 2    | 19 | 0 | 37.9 | 23.32 | 38.24 | 16.44 | 7.13   |
| 973  | 50 | 2 | 0 | 0 | 70    | 20.20 | 2    | 21 | 0 | 25.5 | 11.56 | 33.84 | 15.31 | 6.73   |
| 974  | 53 | 1 | 3 | 0 | 86    | 28.68 | 2    | 52 | 0 | 23.2 | 17.70 | 58.66 | 26.61 | 9.93   |
| 975  | 61 | 1 | 0 | 0 | 75    | 20.50 | 2    | 41 | 0 | 10   | 5.09  | 45.75 | 19.86 | 8.05   |
| 976  | 55 | 1 | 0 | 0 | 98    | 29.14 | 2    | 34 | 0 | 30.7 | 26.16 | 59.17 | 26.30 | 9.02   |
| 977  | 50 | 1 | 1 | 1 | 82    | 22.58 | 1.5  | 44 | 0 | 14.8 | 9.16  | 52.64 | 22.93 | 8.31   |
| 978  | 52 | 2 | 0 | 0 | 103   | 34.49 | 1.5  | 29 | 0 | 37   | 32.58 | 55.52 | 20.56 | 7.85   |
| 979  | 56 | 1 | 1 | 1 | 83    | 22.05 | 2    | 42 | 0 | 22.6 | 14.75 | 50.39 | 22.66 | 7.69   |
| 980  | 58 | 2 | 0 | 0 | 77    | 22.37 | 1.5  | 26 | 0 | 36.7 | 19.16 | 33.07 | 13.90 | 5.58   |
| 981  | 61 | 1 | 0 | 0 | 86.5  | 23.86 | 1.5  | 37 | 0 | 23.9 | 15.63 | 49.71 | 22.66 | 7.91   |
| 982  | 56 | 2 | 0 | 1 | 84    | 28.66 | 1    | 20 | 1 | 35.8 | 21.69 | 38.83 | 17.88 | 8.32   |
| 983  | 62 | 2 | 0 | 1 | 78    | 21.70 | 2    | 21 | 1 | 35.4 | 17.22 | 31.43 | 13.67 | 5.7    |
| 984  | 61 | 2 | 0 | 1 | 73    | 21.68 | 2    | 20 | 0 | 37.2 | 17.06 | 28.75 | 10.61 | 4.86   |
| 985  | 59 | 2 | 0 | 1 | 87    | 24.43 | 1.2  | 27 | 0 | 32.8 | 17.30 | 35.50 | 15.01 | 6.82   |
| 986  | 55 | 2 | 1 | 0 | 70    | 22.66 | 2    | 26 | 0 | 26.8 | 13.24 | 36.12 | 15.81 | 6.17   |
| 987  | 56 | 2 | 0 | 0 | 76    | 21.90 | 1.5  | 21 | 0 | 34.3 | 17.36 | 33.23 | 14.60 | 6.22   |
| 988  | 53 | 1 | 1 | 1 | 89    | 24.44 | 2    | 38 | 0 | 28.9 | 18.08 | 44.40 | 19.62 | 7.36   |
| 989  | 59 | 2 | 0 | 1 | 85    | 26.61 | 3    | 28 | 0 | 30.8 | 18.94 | 42.61 | 17.42 | 7.5    |
| 990  | 58 | 1 | 1 | 0 | 76.5  | 21.91 | 2    | 37 | 0 | 6.7  | 3.75  | 51.78 | 22.62 | 8.65   |
| 991  | 67 | 2 | 0 | 0 | 70    | 21.52 | 2    | 24 | 0 | 27.5 | 12.58 | 33.16 | 13.83 | 6.61   |
| 992  | 50 | 2 | 0 | 1 | 64    | 20.00 | 2    | 20 | 0 | 35.1 | 18.02 | 33.33 | 13.35 | 5.23   |
| 993  | 59 | 1 | 3 | 1 | 84.5  | 26.83 | 2    | 35 | 0 | 27.5 | 18.99 | 49.95 | 23.46 | 8.75   |
| 994  | 51 | 1 | 0 | 1 | 74    | 19.47 | 3    | 42 | 0 | 13.1 | 6.84  | 45.36 | 19.79 | 7.2672 |
| 995  | 59 | 2 | 0 | 0 | 73.4  | 19.71 | 2    | 22 | 0 | 33.6 | 16.69 | 33.06 | 13.77 | 5.3525 |
| 996  | 60 | 2 | 0 | 1 | 88    | 26.11 | 2    | 25 | 0 | 41.1 | 24.25 | 34.74 | 15.26 | 6.6376 |
| 997  | 57 | 2 | 0 | 1 | 70    | 21.19 | 2    | 30 | 0 | 28   | 12.81 | 32.88 | 14.27 | 6.3924 |
| 998  | 67 | 2 | 0 | 0 | 97    | 26.82 | 0.86 | 26 | 1 | 38.6 | 28.26 | 44.93 | 19.87 | 7.9914 |
| 999  | 63 | 1 | 0 | 0 | 79    | 21.48 | 3    | 39 | 0 | 19.6 | 11.73 | 48.25 | 22.81 | 7.692  |
| 1000 | 56 | 1 | 0 | 1 | 91    | 27.22 | 3    | 43 | 0 | 32.3 | 25.56 | 53.64 | 25.30 | 8.4932 |
| 1001 | 57 | 2 | 0 | 0 | 84.5  | 23.49 | 2    | 30 | 0 | 41.8 | 24.57 | 34.22 | 15.34 | 6.0434 |
| 1002 | 52 | 1 | 1 | 1 | 117.5 | 38.26 | 1.5  | 14 | 1 | 38.3 | 38.74 | 62.39 | 25.44 | 9.3652 |
| 1003 | 51 | 1 | 1 | 0 | 88    | 26.04 | 2    | 34 | 1 | 31.6 | 24.18 | 52.40 | 23.75 | 7.9083 |
| 1004 | 58 | 1 | 3 | 1 | 87    | 25.44 | 1.5  | 36 | 0 | 22.8 | 13.90 | 47.01 | 19.78 | 8.1705 |
| 1005 | 57 | 2 | 0 | 0 | 75    | 20.78 | 2    | 21 | 0 | 38.1 | 19.65 | 31.98 | 12.72 | 4.9691 |
| 1006 | 57 | 2 | 0 | 1 | 72    | 25.33 | 3    | 23 | 0 | 40.1 | 22.53 | 33.62 | 14.70 | 6.5338 |
| 1007 | 76 | 1 | 1 | 0 | 87    | 23.33 | 1.5  | 30 | 0 | 21   | 11.26 | 42.38 | 16.90 | 7.0504 |

|      |    |   |   |   |      |       |      |      |   |      |       |       |       |        |
|------|----|---|---|---|------|-------|------|------|---|------|-------|-------|-------|--------|
| 1008 | 61 | 2 | 0 | 1 | 90.5 | 25.11 | 3    | 20   | 0 | 36   | 18.75 | 33.29 | 13.94 | 6.6302 |
| 1009 | 54 | 1 | 1 | 1 | 92   | 26.02 | 3    | 56   | 0 | 28.5 | 21.16 | 53.16 | 24.30 | 8.3019 |
| 1010 | 54 | 2 | 0 | 1 | 91   | 30.12 | 1.5  | 21   | 0 | 49.8 | 35.70 | 36.00 | 14.97 | 6.0199 |
| 1011 | 62 | 2 | 0 | 0 | 86   | 23.42 | 2    | 27   | 0 | 36.7 | 21.70 | 37.40 | 15.86 | 6.4257 |
| 1012 | 54 | 1 | 0 | 0 | 94   | 28.98 | 2    | 48   | 0 | 26.8 | 20.35 | 55.48 | 26.56 | 9.7447 |
| 1013 | 56 | 1 | 1 | 1 | 94   | 26.42 | 3    | 50   | 0 | 28.8 | 22.55 | 55.65 | 24.93 | 8.0127 |
| 1014 | 62 | 1 | 0 | 1 | 88   | 25.71 | 3    | 57   | 0 | 27.9 | 19.97 | 51.62 | 23.24 | 7.8838 |
| 1015 | 64 | 1 | 0 | 1 | 80   | 20.46 | 1.5  | 27   | 1 | 24.9 | 12.60 | 37.95 | 16.64 | 6.3394 |
| 1016 | 63 | 1 | 0 | 1 | 96   | 25.94 | 2    | 43   | 0 | 27   | 17.11 | 46.27 | 20.27 | 7.8891 |
| 1017 | 54 | 2 | 0 | 1 | 85   | 24.67 | 1.5  | 22   | 0 | 35.5 | 17.46 | 31.71 | 12.41 | 6.1094 |
| 1018 | 73 | 2 | 0 | 0 | 76.5 | 23.42 | 1.5  | 13   | 1 | 35.1 | 20.60 | 38.14 | 15.30 | 5.9335 |
| 1019 | 78 | 1 | 0 | 0 | 94   | 24.96 | 2    | 22   | 1 |      |       |       |       |        |
| 1020 | 77 | 2 | 0 | 0 | 102  | 29.42 | 1    | 16   | 1 | 41.3 | 26.39 | 37.55 | 15.06 | 6.7748 |
| 1021 | 64 | 1 | 0 | 0 | 82   | 28.18 | 2    | 40   | 0 | 23   | 15.12 | 50.74 | 22.95 | 9.6519 |
| 1022 | 75 | 1 | 1 | 1 | 84   | 24.61 | 1.2  | 22   | 2 | 21.6 | 11.20 | 40.57 | 14.74 | 6.63   |
| 1023 | 74 | 2 | 0 | 0 | 99   | 27.20 | 1    | 18   | 1 |      |       |       |       |        |
| 1024 | 61 | 2 | 0 | 0 | 82   | 28.74 | 1.5  | 24   | 0 | 45.4 | 30.22 | 36.33 | 15.64 | 6.3189 |
| 1025 | 61 | 2 | 0 | 0 | 73   | 22.79 | 3    | 30   | 0 | 32.7 | 16.47 | 33.92 | 14.42 | 6.5474 |
| 1026 | 61 | 2 | 0 | 0 | 77   | 23.78 | 2    | 26   | 0 | 35.9 | 19.22 | 34.29 | 14.61 | 6.1608 |
| 1027 | 81 | 2 | 0 | 0 | 95   | 22.24 | 0.67 | 8    | 1 | 18.2 | 7.29  | 32.70 | 13.12 | 7.1364 |
| 1028 | 62 | 1 | 0 | 1 | 63   | 17.54 | 2    | 34   | 0 | 9.7  | 4.50  | 41.75 | 18.77 | 6.8438 |
| 1029 | 61 | 2 | 0 | 0 | 72   | 22.36 | 2    | 22   | 0 | 26.6 | 14.02 | 38.77 | 15.17 | 6.256  |
| 1030 | 75 | 2 | 0 | 0 | 90   | 28.55 | 0.98 | 26   | 1 | 39.7 | 23.47 | 35.63 | 15.19 | 6.9147 |
| 1031 | 76 | 2 | 0 | 0 | 93   | 30.42 | 0.86 | 12   | 2 | 35   | 22.34 | 41.42 | 14.11 | 6.5036 |
| 1032 | 56 | 2 | 0 | 0 | 92   | 33.49 | 1.33 | 20   | 0 | 48   | 31.25 | 33.79 | 14.24 | 6.991  |
| 1033 | 82 | 2 | 0 | 0 | 80   | 23.83 | 1.2  | 15   | 1 | 29.3 | 14.18 | 34.20 | 13.47 | 6.2086 |
| 1034 | 77 | 2 | 0 | 0 | 96   | 28.11 | 2    | 20   | 0 | 41.7 | 30.42 | 42.52 | 18.69 | 7.1381 |
| 1035 | 52 | 2 | 0 | 1 | 106  | 41.11 | 1.5  | 22   | 0 | 56.7 | 48.15 | 36.76 | 13.66 | 6.255  |
| 1036 | 54 | 2 | 0 | 0 | 83   | 27.37 | 2    | 30   | 0 | 44   | 30.59 | 38.92 | 16.48 | 6.3267 |
| 1037 | 64 | 1 | 0 | 0 | 91.5 | 26.45 | 1.69 | 34   | 1 | 28.1 | 18.78 | 48.16 | 20.56 | 7.8164 |
| 1038 | 72 | 1 | 1 | 1 | 89   | 25.60 | 2    | 30   | 1 | 25.3 | 17.14 | 50.62 | 22.72 | 8.4765 |
| 1039 | 55 | 2 | 0 | 0 | 71.5 | 23.37 | 1.5  | 24   | 0 | 34.8 | 17.46 | 32.73 | 13.22 | 5.9854 |
| 1040 | 53 | 1 | 0 | 1 | 101  | 35.16 | 2    | 45   | 0 | 41   | 37.98 | 54.57 | 21.59 | 8.0764 |
| 1041 | 59 | 2 | 0 | 0 | 96   | 26.14 | 1.5  | 22   | 0 | 36.8 | 20.22 | 34.66 | 13.64 | 6.4258 |
| 1042 | 64 | 2 | 0 | 0 | 83   | 23.81 | 1.2  | 19   | 1 | 40.7 | 22.98 | 33.53 | 14.17 | 5.8065 |
| 1043 | 63 | 2 | 0 | 0 | 76   | 24.58 | 2    | 23   | 0 | 36.2 | 20.00 | 35.21 | 14.56 | 6.2361 |
| 1044 | 70 | 1 | 0 | 1 | 84   | 24.36 | 1.5  | 28   | 1 | 20.6 | 12.97 | 49.97 | 21.61 | 8.3154 |
| 1045 | 77 | 1 | 0 | 0 | 85   | 20.89 | 1.5  | 36   | 0 | 26.5 | 14.70 | 40.83 | 17.99 | 6.6404 |
| 1046 | 71 | 2 | 0 | 0 | 84   | 22.30 | 0.92 | 22   | 1 | 40   | 21.86 | 32.83 | 13.24 | 5.3092 |
| 1047 | 64 | 2 | 0 | 0 | 89   | 24.20 | 2    | 22   | 0 | 40.6 | 23.62 | 34.53 | 14.83 | 6.0314 |
| 1048 | 67 | 1 | 0 | 0 | 92   | 26.11 | 1.5  | 30   | 0 | 31.7 | 21.18 | 45.67 | 19.93 | 7.5832 |
| 1049 | 62 | 1 | 1 | 1 | 84   | 25.97 | 2    | 28.5 | 0 | 23.1 | 14.78 | 49.08 | 21.01 | 8.3937 |
| 1050 | 68 | 1 | 3 | 0 | 81   | 20.31 | 2    | 28   | 1 | 14.1 | 7.14  | 43.42 | 18.42 | 7.1969 |
| 1051 | 66 | 2 | 0 | 0 | 90   | 27.16 | 1.69 | 20   | 0 | 46.5 | 30.11 | 34.59 | 13.97 | 5.8386 |
| 1052 | 53 | 1 | 0 | 0 | 91   | 27.93 | 2    | 35   | 0 | 30.9 | 22.09 | 49.44 | 22.20 | 8.4572 |
| 1053 | 55 | 2 | 0 | 0 | 90.5 | 27.73 | 1.2  | 22   | 0 | 45.8 | 31.01 | 36.73 | 16.73 | 6.7524 |
| 1054 | 59 | 2 | 0 | 1 | 71.5 | 23.97 | 1.5  | 25   | 0 | 41.9 | 25.55 | 35.42 | 15.88 | 6.2491 |
| 1055 | 50 | 2 | 0 | 0 | 82.5 | 25.28 | 2.07 | 23   | 0 | 38.4 | 22.96 | 36.88 | 15.55 | 6.2274 |
| 1056 | 71 | 1 | 0 | 1 | 72   | 19.77 | 1.08 | 30   | 1 | 24   | 10.67 | 33.72 | 13.98 | 6.0753 |
| 1057 | 53 | 2 | 0 | 0 | 84   | 27.58 | 1.61 | 18   | 0 | 32.2 | 20.19 | 42.55 | 17.52 | 7.3104 |
| 1058 | 70 | 2 | 0 | 0 | 98   | 25.18 | 1.2  | 20   | 0 | 36.1 | 20.92 | 37.11 | 15.83 | 6.5111 |
| 1059 | 56 | 1 | 0 | 0 | 86   | 24.57 | 1.79 | 49   | 0 | 21.9 | 13.54 | 48.26 | 22.07 | 8.3176 |
| 1060 | 70 | 1 | 0 | 1 | 99   | 28.43 | 2    | 38   | 0 | 29.4 | 23.48 | 56.42 | 26.16 | 9.1269 |
| 1061 | 68 | 2 | 0 | 0 | 82   | 26.74 | 1.2  | 14   | 1 | 46.2 | 27.22 | 31.68 | 12.91 | 5.7935 |
| 1062 | 68 | 2 | 0 | 0 | 102  | 29.27 | 1.2  | 26   | 1 | 37.4 | 27.74 | 46.48 | 20.99 | 7.9874 |
| 1063 | 71 | 2 | 0 | 0 | 88   | 26.99 | 1.2  | 17   | 1 | 40.9 | 21.66 | 31.36 | 12.26 | 6.039  |
| 1064 | 76 | 2 | 0 | 1 | 77   | 23.58 | 1.2  | 14   | 1 | 30.7 | 16.92 | 38.19 | 16.86 | 7.0371 |
| 1065 | 71 | 2 | 0 | 0 | 80   | 25.60 | 2    | 19   | 0 | 38   | 22.22 | 36.26 | 15.25 | 6.6193 |
| 1066 | 54 | 1 | 1 | 1 | 76   | 24.85 | 2    | 41   | 0 | 22.2 | 13.77 | 48.20 | 21.93 | 8.5541 |
| 1067 | 53 | 2 | 0 | 0 | 85   | 27.13 | 1.2  | 25   | 0 | 41   | 27.10 | 38.92 | 16.26 | 6.3754 |
| 1068 | 53 | 2 | 0 | 0 | 87   | 25.91 | 2    | 17   | 1 | 44.3 | 28.94 | 36.45 | 15.36 | 5.9416 |
| 1069 | 52 | 2 | 0 | 0 | 80   | 25.55 | 3    | 27   | 0 | 36.2 | 23.44 | 41.33 | 16.80 | 6.6033 |
| 1070 | 54 | 2 | 0 | 0 | 90   | 24.64 | 1.73 | 27   | 0 | 41.8 | 26.35 | 36.67 | 16.56 | 6.2478 |
| 1071 | 50 | 1 | 0 | 0 | 92   | 27.15 | 2    | 40   | 1 | 23.6 | 18.01 | 58.19 | 25.59 | 8.7805 |
| 1072 | 56 | 1 | 1 | 0 | 94   | 26.67 | 1.85 | 32   | 0 | 28.7 | 18.33 | 45.60 | 19.08 | 7.892  |
| 1073 | 62 | 2 | 0 | 0 | 66.5 | 20.74 | 2    | 26   | 0 | 35.9 | 15.37 | 27.45 | 11.20 | 5.2552 |
| 1074 | 58 | 2 | 0 | 0 | 69.5 | 26.80 | 1.5  | 22   | 0 | 43.9 | 15.62 | 32.77 | 13.73 | 6.1858 |
| 1075 | 62 | 2 | 0 | 1 | 101  | 31.46 | 1.2  | 30   | 0 | 51.7 | 34.77 | 32.54 | 12.30 | 5.6145 |
| 1076 | 73 | 2 | 0 | 0 | 87   | 25.04 | 1.2  | 17   | 1 | 43.8 | 22.38 | 28.68 | 12.09 | 5.8224 |
| 1077 | 70 | 2 | 0 | 0 | 85   | 23.75 | 1.5  | 20   | 0 | 35.6 | 20.80 | 37.57 | 16.82 | 6.9818 |
| 1078 | 61 | 2 | 0 | 0 | 82   | 23.96 | 1.5  | 22   | 0 | 33   | 16.23 | 3.29  | 12.79 | 6.007  |
| 1079 | 63 | 2 | 0 | 0 | 67   | 21.20 | 1.5  | 25   | 0 | 31.7 | 14.86 | 32.01 | 13.09 | 5.8785 |

|      |    |   |   |   |      |       |     |    |   |      |       |       |       |        |
|------|----|---|---|---|------|-------|-----|----|---|------|-------|-------|-------|--------|
| 1080 | 74 | 2 | 0 | 0 | 74   | 28.61 | 1.2 | 20 | 1 | 46.1 | 27.36 | 32.04 | 13.55 | 6.4705 |
| 1081 | 57 | 1 | 1 | 0 | 80   | 24.61 | 2   | 40 | 0 | 28.3 | 18.68 | 47.28 | 18.82 | 6.7331 |
| 1082 | 57 | 2 | 0 | 1 | 80   | 21.39 | 2   | 28 | 0 | 32.5 | 18.77 | 38.98 | 17.18 | 6.358  |
| 1083 | 63 | 2 | 0 | 0 | 83   | 25.33 | 1.5 | 17 | 1 | 35.7 | 19.68 | 35.50 | 14.63 | 6.7713 |
| 1084 | 53 | 2 | 0 | 0 | 77   | 23.51 | 2   | 26 | 0 | 36.5 | 21.08 | 36.72 | 15.63 | 6.1438 |
| 1085 | 68 | 1 | 3 | 0 | 79.5 | 27.48 | 2   | 35 | 0 | 28.9 | 18.89 | 46.40 | 20.36 | 8.3861 |
| 1086 | 58 | 1 | 1 | 1 | 93   | 24.73 | 1.5 | 44 | 0 | 24.5 | 17.82 | 54.86 | 25.43 | 8.557  |
| 1087 | 65 | 1 | 0 | 0 | 85   | 26.13 | 2   | 46 | 0 | 20.2 | 13.73 | 54.24 | 25.63 | 9.3811 |
| 1088 | 66 | 1 | 0 | 0 | 91   | 26.79 | 1.5 | 44 | 0 | 29.2 | 20.30 | 49.22 | 21.59 | 8.227  |
| 1089 | 69 | 2 | 0 | 0 | 85   | 23.35 | 1   | 20 | 1 | 35.4 | 17.66 | 32.27 | 13.38 | 6.066  |
| 1090 | 57 | 1 | 0 | 0 | 80   | 24.17 | 3   | 39 | 0 | 27.4 | 16.07 | 42.61 | 18.81 | 7.4764 |
| 1091 | 76 | 1 | 1 | 0 | 83   | 22.93 | 1.2 | 42 | 1 | 16.7 | 10.21 | 51.00 | 22.60 | 8.5379 |
| 1092 | 73 | 2 | 0 | 0 | 89   | 26.98 | 1.5 | 13 | 1 | 40.7 | 27.04 | 39.33 | 15.36 | 6.2887 |
| 1093 | 51 | 2 | 0 | 1 | 76.5 | 24.76 | 3   | 36 | 0 | 40.5 | 23.63 | 34.74 | 14.84 | 6.0444 |
| 1094 | 63 | 2 | 0 | 0 | 88   | 27.44 | 1.5 | 17 | 1 | 39.1 | 22.37 | 34.85 | 12.40 | 6.0564 |
| 1095 | 52 | 1 | 0 | 0 | 84   | 24.63 | 3   | 41 | 0 | 24.7 | 16.16 | 49.28 | 22.55 | 8.3637 |
| 1096 | 51 | 1 | 0 | 0 | 83   | 26.70 | 1.5 | 42 | 0 | 29.2 | 20.02 | 48.65 | 22.43 | 8.4016 |
| 1097 | 63 | 2 | 0 | 0 | 76   | 28.83 | 2   | 24 | 0 | 39.7 | 26.69 | 40.62 | 16.42 | 7.172  |
| 1098 | 67 | 1 | 0 | 0 | 73.5 | 23.42 | 3   | 30 | 0 | 18.2 | 10.29 | 46.14 | 20.81 | 8.2331 |
| 1099 | 65 | 1 | 3 | 1 | 90   | 24.92 | 1.5 | 41 | 0 | 27.6 | 18.99 | 49.74 | 20.92 | 7.3417 |
| 1100 | 78 | 2 | 0 | 0 | 87   | 29.92 | 1.2 | 21 | 0 | 47.5 | 31.57 | 34.94 | 14.12 | 6.2681 |
| 1101 | 81 | 1 | 0 | 0 | 73   | 18.36 | 1.5 | 27 | 1 | 14.7 | 7.00  | 40.46 | 17.22 | 6.6413 |
| 1102 | 64 | 1 | 0 | 0 | 95   | 28.73 | 2   | 40 | 0 | 37.9 | 27.93 | 45.72 | 20.11 | 7.65   |
| 1103 | 63 | 2 | 0 | 0 | 80.5 | 24.56 | 2   | 29 | 1 | 36.7 | 22.39 | 38.55 | 16.84 | 6.6707 |
| 1104 | 59 | 2 | 0 | 0 | 70   | 19.68 | 2   | 26 | 0 | 28.5 | 13.21 | 33.19 | 13.83 | 5.7789 |
| 1105 | 77 | 1 | 0 | 0 | 91   | 25.36 | 1.2 | 22 | 2 | 22.5 | 15.04 | 51.91 | 23.62 | 8.8451 |
| 1106 | 74 | 2 | 0 | 0 | 96   | 31.94 | 1.2 | 24 | 0 | 38.4 | 26.10 | 41.93 | 16.92 | 7.7987 |
| 1107 | 52 | 2 | 0 | 0 | 63   | 17.96 | 2   | 18 | 0 | 32.3 | 14.60 | 30.65 | 12.69 | 5.3998 |
| 1108 | 53 | 1 | 1 | 1 | 80.5 | 24.08 | 2   | 38 | 0 | 21.6 | 13.06 | 47.47 | 20.09 | 7.9969 |
| 1109 | 51 | 2 | 0 | 0 | 71   | 21.23 | 1.5 | 21 | 0 | 38.1 | 17.41 | 28.32 | 12.08 | 5.4348 |
| 1110 | 54 | 1 | 3 | 1 | 110  | 34.59 | 3   | 52 | 1 |      |       |       |       |        |
| 1111 | 51 | 1 | 0 | 1 | 78   | 22.89 | 2   | 43 | 0 | 13.8 | 8.29  | 51.92 | 23.06 | 8.6694 |
| 1112 | 78 | 1 | 0 | 0 | 90   | 23.79 | 1.5 | 26 | 1 | 26.2 | 16.00 | 44.99 | 20.99 | 7.9775 |
| 1113 | 63 | 1 | 0 | 1 | 98   | 29.86 | 2   | 30 | 0 | 34.8 | 27.01 | 50.66 | 20.80 | 7.7248 |
| 1114 | 65 | 1 | 0 | 1 | 83   | 23.83 | 1.5 | 35 | 0 | 20.5 | 12.35 | 47.85 | 21.51 | 8.3593 |
| 1115 | 63 | 2 | 0 | 0 | 71   | 23.75 | 1.5 | 23 | 0 | 28.6 | 13.63 | 33.98 | 14.08 | 6.8946 |
| 1116 | 59 | 1 | 1 | 1 | 91   | 27.46 | 2   | 30 | 0 | 27   | 18.68 | 50.54 | 22.23 | 8.7916 |
| 1117 | 55 | 2 | 0 | 1 | 74   | 22.03 | 2   | 25 | 0 | 33.7 | 18.80 | 36.93 | 16.05 | 6.3244 |
| 1118 | 55 | 1 | 3 | 1 | 85.5 | 29.18 | 2   | 37 | 1 | 22.6 | 15.03 | 51.51 | 22.08 | 9.5455 |
| 1119 | 55 | 2 | 0 | 0 | 81   | 28.58 | 2   | 24 | 0 | 40.8 | 25.36 | 36.84 | 16.41 | 7.4214 |
| 1120 | 59 | 2 | 0 | 0 | 93   | 32.17 | 1.5 | 24 | 0 | 40.2 | 30.59 | 45.58 | 19.24 | 7.9352 |
| 1121 | 50 | 2 | 0 | 0 | 83   | 25.85 | 1.5 | 31 | 0 | 35.1 | 20.82 | 38.58 | 17.02 | 7.2213 |
| 1122 | 55 | 2 | 0 | 1 | 80   | 26.09 | 1.5 | 30 | 0 | 35.5 | 22.63 | 41.15 | 18.89 | 7.6522 |
| 1123 | 60 | 1 | 0 | 1 | 86   | 24.57 | 3   | 46 | 0 | 25.1 | 17.99 | 53.74 | 24.39 | 8.1288 |
| 1124 | 58 | 2 | 0 | 0 | 79   | 25.34 | 2   | 25 | 0 | 28.7 | 16.56 | 41.07 | 16.70 | 7.2948 |
| 1125 | 61 | 2 | 0 | 0 | 98.5 | 32.17 | 1.5 | 28 | 0 | 45   | 33.78 | 41.22 | 17.45 | 7.245  |
| 1126 | 68 | 1 | 0 | 1 | 75.5 | 20.79 | 1.5 | 23 | 1 | 12.4 | 6.25  | 44.09 | 18.90 | 7.5997 |
| 1127 | 57 | 1 | 0 | 0 | 94   | 29.71 | 1.5 | 38 | 1 | 38.9 | 27.79 | 43.64 | 18.95 | 7.4844 |
| 1128 | 54 | 2 | 0 | 0 | 78   | 23.82 | 2   | 24 | 0 | 40.8 | 22.18 | 32.24 | 13.68 | 5.7699 |
| 1129 | 71 | 1 | 1 | 0 | 84.5 | 23.36 | 2   | 33 | 0 | 26.4 | 14.81 | 41.37 | 17.98 | 7.0938 |
| 1130 | 57 | 1 | 0 | 1 | 95   | 25.88 | 2   | 48 | 0 | 30.1 | 21.30 | 49.54 | 21.61 | 7.7017 |
| 1131 | 56 | 1 | 1 | 1 | 93   | 26.53 | 2   | 52 | 0 | 19.7 | 16.40 | 66.70 | 29.57 | 9.2173 |
| 1132 | 51 | 1 | 1 | 0 | 85   | 24.39 | 3   | 50 | 0 | 16.9 | 12.27 | 60.35 | 27.47 | 8.9099 |
| 1133 | 50 | 2 | 0 | 0 | 75   | 23.81 | 2   | 24 | 0 | 35.9 | 21.54 | 38.41 | 15.91 | 6.1604 |
| 1134 | 55 | 1 | 3 | 1 | 80   | 24.43 | 2   | 39 | 0 | 22.2 | 14.27 | 49.93 | 23.35 | 8.6692 |
| 1135 | 53 | 1 | 1 | 1 | 80   | 19.32 | 2   | 32 | 0 | 16.6 | 9.25  | 46.43 | 19.82 | 6.8267 |
| 1136 | 59 | 2 | 0 | 0 | 88   | 28.15 | 1.5 | 26 | 0 | 43.4 | 29.84 | 38.94 | 16.43 | 6.6826 |
| 1137 | 76 | 2 | 0 | 1 | 86   | 21.20 | 2   | 22 | 0 | 29.5 | 13.94 | 33.28 | 14.37 | 6.3195 |
| 1138 | 68 | 1 | 1 | 1 | 78   | 22.55 | 1.5 | 41 | 0 | 25.5 | 13.54 | 39.64 | 17.32 | 7.0897 |
| 1139 | 56 | 1 | 0 | 1 | 92.5 | 27.26 | 1.2 | 25 | 1 | 27.7 | 19.62 | 51.27 | 22.95 | 8.6047 |
| 1140 | 52 | 1 | 1 | 0 | 81   | 22.49 | 2   | 26 | 1 | 16.7 | 10.29 | 51.33 | 21.25 | 7.797  |
| 1141 | 57 | 1 | 0 | 1 | 99   | 31.31 | 2   | 40 | 0 | 22.4 | 19.46 | 67.31 | 31.01 | 11.174 |
| 1142 | 62 | 1 | 0 | 0 | 91   | 26.47 | 2   | 48 | 1 | 27.5 | 21.35 | 56.33 | 24.55 | 8.1821 |
| 1143 | 58 | 2 | 0 | 1 | 79   | 22.89 | 1.5 | 16 | 1 | 40.2 | 20.12 | 29.95 | 12.04 | 5.3928 |
| 1144 | 60 | 2 | 0 | 0 | 96.5 | 31.14 | 2   | 27 | 0 | 45.4 | 33.94 | 40.77 | 16.51 | 6.8526 |
| 1145 | 60 | 1 | 1 | 0 | 83   | 23.92 | 1.5 | 30 | 0 | 22.2 | 13.70 | 48.08 | 20.07 | 7.7408 |
| 1146 | 78 | 2 | 0 | 0 | 85   | 22.26 | 1.5 | 19 | 1 | 38   | 19.90 | 32.49 | 13.12 | 5.4905 |
| 1147 | 76 | 2 | 0 | 0 | 94   | 25.29 | 1.2 | 15 | 1 | 38.7 | 21.84 | 34.64 | 12.70 | 5.7038 |
| 1148 | 64 | 2 | 0 | 0 | 96.5 | 34.96 | 1.2 | 25 | 1 | 48.3 | 40.19 | 43.02 | 18.02 | 7.6085 |
| 1149 | 62 | 1 | 3 | 1 | 83   | 24.13 | 2   | 48 | 0 | 24.6 | 15.87 | 48.64 | 22.07 | 8.1062 |
| 1150 | 62 | 1 | 1 | 1 | 87   | 25.51 | 2   | 38 | 1 | 24.7 | 17.22 | 52.40 | 23.18 | 8.3497 |
| 1151 | 56 | 1 | 0 | 0 | 93   | 28.68 | 2   | 46 | 0 | 28.4 | 22.62 | 56.96 | 26.00 | 9.3436 |



|      |    |   |   |   |      |       |      |    |   |      |       |       |       |        |
|------|----|---|---|---|------|-------|------|----|---|------|-------|-------|-------|--------|
| 1152 | 53 | 2 | 0 | 0 | 68   | 22.74 | 1.5  | 24 | 0 | 40.8 | 21.73 | 31.59 | 13.58 | 5.7722 |
| 1153 | 59 | 2 | 0 | 1 | 79   | 24.20 | 1.5  | 30 | 0 | 34.4 | 20.17 | 38.44 | 15.07 | 6.226  |
| 1154 | 70 | 1 | 0 | 0 | 72   | 19.91 | 1.5  | 31 | 0 | 17.7 | 8.74  | 40.63 | 17.22 | 6.733  |
| 1155 | 63 | 2 | 0 | 0 | 82.5 | 26.14 | 1.2  | 19 | 0 | 33.2 | 18.54 | 37.36 | 16.28 | 7.3622 |
| 1156 | 54 | 2 | 0 | 0 | 93.5 | 22.15 | 2    | 22 | 0 | 32.7 | 18.39 | 37.86 | 15.35 | 6.0698 |
| 1157 | 59 | 1 | 0 | 1 | 90   | 26.75 | 2    | 46 | 0 | 31.2 | 21.87 | 48.13 | 22.34 | 8.4278 |
| 1158 | 52 | 2 | 0 | 0 | 78   | 27.41 | 2    | 21 | 0 | 41.7 | 27.20 | 37.96 | 16.03 | 6.7575 |
| 1159 | 55 | 1 | 1 | 1 | 83   | 27.10 | 2    | 43 | 0 | 24.3 | 17.16 | 53.57 | 23.97 | 9.0218 |
| 1160 | 75 | 1 | 0 | 0 | 93.5 | 25.68 | 1.5  | 34 | 0 | 29.2 | 21.67 | 52.46 | 23.69 | 8.1003 |
| 1161 | 74 | 2 | 0 | 0 | 96.5 | 28.95 | 1.2  | 25 | 0 | 37.4 | 26.82 | 44.86 | 16.99 | 6.6367 |
| 1162 | 61 | 2 | 0 | 1 | 80.5 | 25.65 | 1.5  | 25 | 0 | 38.8 | 24.23 | 38.17 | 16.80 | 6.7627 |
| 1163 | 63 | 2 | 0 | 0 | 80   | 24.11 | 1    | 24 | 1 | 35.6 | 20.59 | 37.32 | 15.44 | 6.2871 |
| 1164 | 50 | 2 | 0 | 1 | 65   | 19.72 | 2    | 27 | 0 | 21.8 | 11.14 | 39.93 | 17.93 | 6.8899 |
| 1165 | 52 | 2 | 0 | 0 | 69   | 21.63 | 2    | 19 | 0 | 32.8 | 16.09 | 32.94 | 13.87 | 6.0354 |
| 1166 | 53 | 2 | 0 | 1 | 76   | 22.88 | 1.5  | 24 | 0 | 38.5 | 20.30 | 32.46 | 13.32 | 5.5506 |
| 1167 | 58 | 1 | 1 | 1 | 91   | 25.41 | 2    | 40 | 0 | 20   | 13.54 | 54.21 | 23.70 | 8.7256 |
| 1168 | 59 | 1 | 3 | 1 | 89   | 23.47 | 2    | 34 | 1 | 29.5 | 20.88 | 49.97 | 22.02 | 7.2912 |
| 1169 | 60 | 1 | 1 | 0 | 76   | 21.37 | 2    | 40 | 0 | 14.4 | 8.33  | 49.71 | 22.04 | 7.9393 |
| 1170 | 56 | 2 | 0 | 0 | 57.5 | 17.13 | 1.5  | 24 | 1 | 17   | 7.09  | 34.55 | 13.98 | 5.7307 |
| 1171 | 65 | 1 | 0 | 1 | 87   | 22.33 | 2    | 27 | 1 | 17.3 | 10.97 | 52.59 | 23.55 | 8.2146 |
| 1172 | 51 | 1 | 0 | 0 | 84   | 24.28 | 2    | 36 | 1 | 27.2 | 18.83 | 50.37 | 21.89 | 7.7547 |
| 1173 | 59 | 1 | 1 | 1 | 90   | 26.51 | 2    | 39 | 0 | 27.5 | 19.82 | 52.26 | 24.05 | 8.5812 |
| 1174 | 61 | 2 | 0 | 0 | 84   | 30.17 | 1.5  | 32 | 0 | 46.9 | 32.73 | 37.00 | 17.17 | 7.1749 |
| 1175 | 85 | 1 | 0 | 0 | 86   | 24.73 | 1.2  | 25 | 1 | 26.9 | 16.62 | 45.10 | 19.57 | 7.6434 |
| 1176 | 57 | 1 | 3 | 0 | 89   | 26.97 | 1.5  | 39 | 0 | 32.9 | 25.87 | 52.70 | 23.74 | 8.0537 |
| 1177 | 75 | 2 | 0 | 0 | 101  | 29.10 | 0.22 | 11 | 2 | 44.8 | 28.23 | 34.81 | 15.33 | 6.894  |
| 1178 | 81 | 1 | 3 | 1 | 87   | 22.72 | 1.5  | 24 | 1 | 22.6 | 13.34 | 45.63 | 20.02 | 7.5815 |
| 1179 | 51 | 2 | 0 | 0 | 66   | 20.40 | 2    | 23 | 0 | 27.8 | 11.97 | 31.12 | 12.22 | 5.7961 |
| 1180 | 50 | 1 | 0 | 0 | 86.5 | 27.94 | 2    | 50 | 0 | 29   | 21.54 | 52.85 | 24.86 | 9.1858 |
| 1181 | 57 | 2 | 0 | 0 | 89   | 30.18 | 1.5  | 29 | 0 | 39   | 28.69 | 44.92 | 19.69 | 8.0286 |
| 1182 | 58 | 1 | 1 | 0 | 97   | 28.92 | 2    | 40 | 1 | 31.4 | 21.80 | 47.57 | 20.63 | 8.3897 |
| 1183 | 57 | 1 | 0 | 1 | 81   | 22.63 | 3    | 45 | 0 | 20   | 13.49 | 53.92 | 24.48 | 8.1591 |
| 1184 | 57 | 2 | 0 | 0 | 71   | 22.29 | 2    | 39 | 0 | 28.7 | 16.07 | 39.99 | 18.17 | 7.1061 |
| 1185 | 51 | 2 | 0 | 0 | 82.5 | 22.74 | 3    | 30 | 1 | 35.4 | 20.06 | 36.53 | 15.23 | 5.9704 |
| 1186 | 63 | 1 | 1 | 0 | 103  | 27.35 | 2    | 42 | 0 | 24.9 | 22.06 | 66.68 | 29.62 | 8.9801 |
| 1187 | 55 | 2 | 0 | 0 | 75   | 22.16 | 1.5  | 24 | 0 | 40.4 | 19.36 | 28.62 | 12.10 | 5.4292 |
| 1188 | 57 | 1 | 0 | 1 | 82   | 26.06 | 2    | 39 | 0 | 20.9 | 14.39 | 54.52 | 24.59 | 9.0001 |
| 1189 | 88 | 2 | 0 | 0 | 88   | 24.74 | 0.86 | 15 | 2 | 39.6 | 21.52 | 32.78 | 11.41 | 5.162  |
| 1190 | 51 | 2 | 0 | 0 | 77   | 21.88 | 2    | 28 | 0 | 38.4 | 21.22 | 34.05 | 15.14 | 5.9571 |
| 1191 | 54 | 1 | 0 | 0 | 82   | 22.11 | 3    | 42 | 0 | 11.7 | 6.81  | 51.56 | 23.75 | 8.8073 |
| 1192 | 50 | 2 | 1 | 0 | 84   | 29.03 | 1.5  | 27 | 0 | 34.5 | 22.72 | 43.04 | 16.55 | 7.0965 |
| 1193 | 61 | 2 | 0 | 1 | 69.5 | 24.01 | 2    | 23 | 0 | 38   | 21.83 | 35.68 | 14.99 | 6.2144 |
| 1194 | 52 | 2 | 0 | 0 | 86   | 24.75 | 1.5  | 32 | 0 | 38.2 | 24.95 | 40.34 | 17.21 | 6.4945 |
| 1195 | 59 | 2 | 0 | 1 | 80   | 24.16 | 1.2  | 30 | 0 | 36.2 | 21.12 | 37.19 | 15.98 | 6.5308 |
| 1196 | 55 | 2 | 1 | 0 | 78   | 24.17 | 1.5  | 28 | 0 | 36.1 | 20.71 | 36.73 | 15.21 | 6.1233 |
| 1197 | 65 | 2 | 0 | 0 | 81   | 26.52 | 1.5  | 15 | 1 | 43.8 | 29.49 | 37.89 | 17.68 | 6.9145 |
| 1198 | 50 | 1 | 3 | 1 | 90   | 27.41 | 3    | 45 | 0 | 30   | 21.43 | 50.09 | 22.75 | 8.5327 |
| 1199 | 54 | 2 | 0 | 0 | 63   | 16.98 | 2    | 16 | 1 | 13.8 | 5.54  | 34.50 | 14.54 | 6.0681 |
| 1200 | 61 | 1 | 0 | 0 | 94.5 | 29.04 | 2    | 42 | 0 | 28.6 | 22.94 | 57.16 | 25.20 | 9.0347 |
| 1201 | 65 | 2 | 0 | 0 | 86   | 25.43 | 1.5  | 27 | 0 | 37.7 | 23.59 | 38.93 | 16.71 | 6.9548 |
| 1202 | 51 | 2 | 0 | 0 | 72.5 | 21.62 | 1.5  | 27 | 0 | 29.1 | 15.15 | 36.87 | 15.65 | 6.2997 |
| 1203 | 51 | 1 | 0 | 1 | 79   | 25.89 | 2    | 47 | 0 | 26.6 | 19.07 | 52.73 | 23.89 | 8.4634 |
| 1204 | 54 | 2 | 0 | 0 | 88   | 27.30 | 2    | 21 | 0 | 37.4 | 22.83 | 38.58 | 15.22 | 6.8551 |
| 1205 | 52 | 2 | 0 | 0 | 87   | 28.88 | 2    | 21 | 0 | 42.8 | 28.59 | 38.13 | 15.90 | 6.7056 |
| 1206 | 77 | 2 | 0 | 0 | 94   | 30.67 | 1    | 16 | 2 | 38.9 | 31.37 | 49.27 | 21.33 | 8.116  |
| 1207 | 69 | 2 | 0 | 0 | 79   | 23.07 | 1.5  | 20 | 0 | 35.4 | 18.86 | 34.48 | 14.22 | 6.0989 |
| 1208 | 71 | 1 | 0 | 0 | 86   | 23.94 | 1.2  | 24 | 1 | 21.3 | 13.37 | 49.36 | 21.83 | 8.0785 |
| 1209 | 64 | 1 | 0 | 0 | 79   | 20.51 | 1.5  | 31 | 0 | 19.3 | 10.25 | 42.85 | 18.70 | 7.039  |
| 1210 | 59 | 2 | 0 | 0 | 87   | 25.23 | 1.2  | 23 | 0 | 37.4 | 17.91 | 29.95 | 11.63 | 5.9486 |
| 1211 | 62 | 2 | 0 | 0 | 86   | 25.66 | 1.2  | 20 | 0 | 36.6 | 21.10 | 36.59 | 15.38 | 6.8621 |
| 1212 | 51 | 1 | 1 | 1 | 71   | 22.03 | 1.2  | 34 | 1 | 11.5 | 6.79  | 52.33 | 24.51 | 8.8501 |
| 1213 | 61 | 1 | 3 | 0 | 85   | 26.45 | 2    | 35 | 1 | 30.7 | 20.26 | 45.66 | 20.38 | 8.0222 |
| 1214 | 53 | 2 | 0 | 0 | 74   | 23.46 | 1.5  | 33 | 0 | 32   | 19.41 | 41.22 | 19.62 | 7.2139 |
| 1215 | 54 | 1 | 1 | 0 | 82   | 23.73 | 2    | 40 | 0 | 20.3 | 12.18 | 47.75 | 20.87 | 8.1716 |
| 1216 | 50 | 1 | 3 | 1 | 85   | 23.89 | 2    | 41 | 0 | 20.6 | 13.17 | 50.62 | 22.73 | 8.3284 |
| 1217 | 66 | 1 | 1 | 1 | 91.5 | 25.35 | 2    | 31 | 0 | 37.6 | 27.59 | 45.75 | 18.29 | 6.1817 |
| 1218 | 57 | 2 | 0 | 0 | 98.5 | 27.69 | 2    | 26 | 0 | 48.7 | 37.36 | 39.38 | 15.55 | 6.1505 |
| 1219 | 53 | 1 | 0 | 0 | 89   | 24.64 | 2    | 45 | 0 | 27.5 | 18.51 | 48.83 | 21.93 | 7.7512 |
| 1220 | 55 | 1 | 0 | 0 | 82   | 22.15 | 2    | 24 | 1 | 20   | 12.99 | 51.87 | 22.92 | 7.6565 |
| 1221 | 50 | 2 | 0 | 0 | 60.5 | 20.25 | 3    | 29 | 0 | 28.6 | 12.24 | 30.55 | 12.60 | 5.797  |
| 1222 | 56 | 2 | 0 | 0 | 63   | 20.20 | 2    | 23 | 0 | 33.6 | 16.82 | 33.27 | 14.05 | 5.5836 |
| 1223 | 64 | 2 | 0 | 0 | 71   | 20.12 | 2    | 27 | 0 | 32.4 | 16.96 | 35.45 | 14.87 | 5.6448 |

|      |    |   |   |   |      |       |      |    |   |      |       |       |       |        |
|------|----|---|---|---|------|-------|------|----|---|------|-------|-------|-------|--------|
| 1224 | 71 | 1 | 0 | 0 | 97   | 27.35 | 1    | 19 | 2 | 28   | 19.45 | 50.00 | 22.89 | 8.9171 |
| 1225 | 62 | 2 | 0 | 0 | 78   | 26.48 | 1.5  | 28 | 0 | 31.7 | 18.50 | 39.95 | 16.64 | 7.4045 |
| 1226 | 67 | 1 | 1 | 1 | 85   | 27.17 | 2    | 34 | 1 | 25   | 16.55 | 49.75 | 21.89 | 8.9822 |
| 1227 | 66 | 2 | 0 | 1 | 60   | 20.16 | 1.5  | 26 | 0 | 29.4 | 13.45 | 32.35 | 12.89 | 5.1827 |
| 1228 | 70 | 1 | 0 | 0 | 86   | 23.97 | 2    | 32 | 0 | 32.7 | 21.12 | 43.47 | 18.05 | 6.607  |
| 1229 | 72 | 1 | 3 | 0 | 90   | 25.60 | 1.5  | 38 | 0 | 25.8 | 17.94 | 51.49 | 19.49 | 6.9288 |
| 1230 | 71 | 2 | 0 | 0 | 94   | 33.84 | 1.2  | 25 | 1 | 49.5 | 39.37 | 40.21 | 19.65 | 8.168  |
| 1231 | 61 | 1 | 1 | 1 | 84   | 25.40 | 3    | 36 | 0 | 24.8 | 17.96 | 54.55 | 26.09 | 9.4669 |
| 1232 | 65 | 2 | 0 | 0 | 83   | 22.03 | 1.2  | 13 | 1 | 37.5 | 17.60 | 29.38 | 12.82 | 5.8841 |
| 1233 | 53 | 1 | 3 | 1 | 74   | 22.51 | 2    | 38 | 0 | 15.4 | 9.66  | 53.03 | 25.20 | 8.7006 |
| 1234 | 52 | 2 | 0 | 0 | 72   | 21.51 | 1.5  | 21 | 0 | 25.6 | 13.84 | 40.25 | 18.35 | 7.2955 |
| 1235 | 82 | 1 | 3 | 1 | 89   | 25.51 | 1.5  | 24 | 1 | 23.2 | 15.10 | 50.04 | 21.24 | 8.2331 |
| 1236 | 50 | 2 | 0 | 1 | 80   | 23.61 | 2    | 25 | 1 | 39   | 23.97 | 37.41 | 16.23 | 6.1984 |
| 1237 | 65 | 2 | 0 | 1 | 76   | 18.90 | 2    | 23 | 0 | 25.2 | 11.18 | 33.16 | 13.33 | 5.6362 |
| 1238 | 57 | 2 | 0 | 0 | 78   | 20.40 | 2    | 20 | 0 | 27.8 | 13.32 | 34.58 | 13.76 | 5.8264 |
| 1239 | 53 | 2 | 0 | 0 | 73.5 | 24.19 | 1.5  | 34 | 0 | 39.5 | 22.59 | 34.61 | 15.21 | 6.454  |
| 1240 | 55 | 1 | 1 | 1 | 85   | 24.83 | 1.5  | 38 | 1 | 26.8 | 18.78 | 51.34 | 22.34 | 7.8687 |
| 1241 | 79 | 2 | 0 | 0 | 69   | 20.12 | 1.5  | 19 | 0 | 30.2 | 13.63 | 31.42 | 12.63 | 5.5905 |
| 1242 | 53 | 2 | 0 | 0 | 87   | 30.21 | 1.5  | 27 | 0 | 41.6 | 26.87 | 37.68 | 16.12 | 7.3802 |
| 1243 | 59 | 2 | 0 | 0 | 74   | 20.44 | 1.5  | 20 | 0 | 39.6 | 19.78 | 30.17 | 12.63 | 5.1617 |
| 1244 | 50 | 2 | 0 | 0 | 76.5 | 24.21 | 1.5  | 26 | 0 | 40.3 | 24.12 | 35.80 | 15.74 | 6.2268 |
| 1245 | 54 | 1 | 1 | 1 | 94   | 27.89 | 3    | 39 | 0 | 31.6 | 24.57 | 53.25 | 23.86 | 8.2762 |
| 1246 | 63 | 1 | 3 | 0 | 82   | 22.21 | 2    | 31 | 0 | 17.5 | 11.08 | 52.16 | 22.18 | 7.5672 |
| 1247 | 62 | 2 | 0 | 0 | 83   | 25.63 | 2    | 22 | 0 | 42   | 25.03 | 34.55 | 14.41 | 6.1144 |
| 1248 | 59 | 2 | 0 | 1 | 80   | 24.97 | 1.5  | 27 | 0 | 44.1 | 26.42 | 33.84 | 14.68 | 6.1116 |
| 1249 | 54 | 2 | 0 | 0 | 78   | 24.50 | 2    | 23 | 1 | 40.2 | 24.48 | 36.44 | 15.32 | 5.9773 |
| 1250 | 74 | 1 | 0 | 1 | 87   | 23.93 | 2    | 28 | 1 | 26.5 | 16.58 | 46.05 | 19.93 | 7.5112 |
| 1251 | 53 | 1 | 3 | 1 | 82   | 23.81 | 2    | 39 | 0 | 21.5 | 12.96 | 47.20 | 21.04 | 8.1084 |
| 1252 | 60 | 2 | 0 | 0 | 74.5 | 21.89 | 1.5  | 27 | 0 | 35.7 | 19.52 | 35.23 | 14.77 | 5.7336 |
| 1253 | 50 | 1 | 0 | 1 | 81   | 21.97 | 1.5  | 40 | 0 | 19   | 11.34 | 48.40 | 21.25 | 7.8705 |
| 1254 | 60 | 2 | 0 | 0 | 79   | 24.18 | 1.15 | 31 | 0 | 32.2 | 18.68 | 39.30 | 15.93 | 6.5606 |
| 1255 | 54 | 1 | 3 | 0 | 90   | 26.74 | 2    | 36 | 0 | 31.5 | 22.39 | 48.59 | 21.23 | 7.8085 |
| 1256 | 62 | 1 | 1 | 0 | 81   | 21.48 | 2    | 45 | 0 | 17.2 | 10.57 | 50.98 | 22.66 | 7.6757 |
| 1257 | 61 | 1 | 3 | 0 | 87   | 25.52 | 2    | 34 | 0 | 24.6 | 17.26 | 53.00 | 23.89 | 8.5867 |
| 1258 | 61 | 2 | 0 | 0 | 91   | 29.18 | 1.5  | 20 | 0 | 40.6 | 25.80 | 37.81 | 14.75 | 6.7244 |
| 1259 | 59 | 2 | 0 | 1 | 87   | 28.51 | 1.5  | 24 | 0 | 44.2 | 27.70 | 34.90 | 14.36 | 6.3572 |
| 1260 | 77 | 1 | 0 | 1 | 92   | 22.60 | 1.5  | 30 | 0 | 19.8 | 11.34 | 45.87 | 19.35 | 7.3994 |
| 1261 | 55 | 2 | 0 | 0 | 73   | 21.85 | 2    | 21 | 0 | 33   | 18.14 | 36.81 | 16.20 | 6.2665 |
| 1262 | 55 | 2 | 0 | 0 | 81   | 20.64 | 2    | 25 | 1 | 31.7 | 15.40 | 33.16 | 13.35 | 5.5006 |
| 1263 | 53 | 2 | 0 | 0 | 80   | 24.27 | 2    | 30 | 0 | 37.1 | 21.10 | 35.78 | 15.83 | 6.6909 |
| 1264 | 76 | 2 | 0 | 0 | 76   | 25.12 | 1.2  | 21 | 1 | 36   | 20.54 | 36.47 | 15.40 | 6.5795 |
| 1265 | 53 | 1 | 3 | 0 | 102  | 34.54 | 2    | 35 | 0 | 37.5 | 36.81 | 61.29 | 25.91 | 8.7973 |
| 1266 | 55 | 2 | 1 | 1 | 66   | 19.58 | 1.5  | 28 | 0 | 29.9 | 15.25 | 35.66 | 14.88 | 5.6154 |
| 1267 | 57 | 2 | 0 | 0 | 75   | 23.45 | 1.5  | 17 | 1 | 40.9 | 22.63 | 32.76 | 13.75 | 5.6565 |
| 1268 | 53 | 1 | 0 | 0 | 84   | 24.57 | 2    | 43 | 0 | 19.6 | 12.06 | 49.46 | 22.68 | 8.8574 |
| 1269 | 54 | 2 | 0 | 1 | 64   | 19.66 | 2    | 32 | 0 | 27.8 | 13.80 | 35.76 | 15.25 | 5.9122 |
| 1270 | 70 | 1 | 3 | 1 | 74   | 20.46 | 1.2  | 25 | 2 | 20.7 | 9.76  | 37.30 | 15.19 | 6.5738 |
| 1271 | 63 | 2 | 0 | 0 | 90   | 33.56 | 1.2  | 16 | 1 | 51.6 | 38.62 | 36.21 | 14.65 | 6.6063 |
| 1272 | 67 | 1 | 0 | 0 | 89   | 25.62 | 1.2  | 32 | 1 | 24.2 | 16.35 | 51.15 | 23.30 | 8.6521 |
| 1273 | 62 | 2 | 0 | 0 | 75   | 26.17 | 0.67 | 21 | 1 | 40.2 | 21.59 | 32.12 | 13.46 | 6.4266 |
| 1274 | 56 | 2 | 0 | 0 | 76   | 21.22 | 2    | 27 | 0 | 38.2 | 19.88 | 32.21 | 13.31 | 5.3576 |
| 1275 | 59 | 1 | 1 | 0 | 84   | 23.31 | 1.5  | 34 | 0 | 23.3 | 13.23 | 43.56 | 19.23 | 7.6345 |
| 1276 | 77 | 2 | 0 | 0 | 97   | 27.61 | 1.5  | 19 | 1 | 43.2 | 27.04 | 35.56 | 11.73 | 5.0417 |
| 1277 | 53 | 2 | 0 | 0 | 84   | 27.31 | 2    | 25 | 0 | 44.6 | 31.47 | 39.12 | 17.50 | 6.6102 |
| 1278 | 59 | 2 | 0 | 0 | 82   | 26.63 | 1.5  | 28 | 0 | 40.3 | 23.56 | 34.83 | 14.88 | 6.6479 |
| 1279 | 61 | 1 | 1 | 1 | 90   | 26.92 | 1.5  | 33 | 1 | 30.5 | 22.31 | 50.85 | 23.01 | 8.2498 |
| 1280 | 53 | 2 | 0 | 0 | 69   | 22.59 | 2    | 24 | 0 | 32.4 | 17.23 | 35.98 | 15.37 | 6.4045 |
| 1281 | 65 | 2 | 0 | 0 | 88   | 28.49 | 1.5  | 24 | 0 | 44.9 | 28.46 | 34.91 | 14.28 | 6.459  |
| 1282 | 71 | 1 | 0 | 0 | 92   | 26.06 | 2    | 24 | 1 | 27.6 | 19.17 | 50.20 | 11.98 | 4.3833 |
| 1283 | 71 | 1 | 0 | 0 | 89.5 | 25.51 | 2    | 41 | 0 | 28.3 | 23.84 | 60.50 | 27.23 | 8.2309 |
| 1284 | 58 | 2 | 0 | 0 | 80.5 | 27.67 | 2    | 32 | 0 | 41.8 | 28.27 | 39.37 | 16.11 | 6.3305 |
| 1285 | 58 | 2 | 0 | 0 | 95   | 32.80 | 1.2  | 22 | 0 | 46.9 | 36.41 | 41.25 | 18.43 | 7.6428 |
| 1286 | 52 | 1 | 3 | 0 | 99   | 26.38 | 2    | 39 | 0 | 31.3 | 22.84 | 50.12 | 21.87 | 7.7947 |
| 1287 | 70 | 1 | 0 | 0 | 97   | 29.75 | 2    | 38 | 0 | 31.9 | 25.85 | 55.10 | 24.48 | 8.9906 |
| 1288 | 61 | 2 | 0 | 0 | 69   | 22.67 | 1.2  | 27 | 0 | 38.3 | 20.66 | 33.24 | 13.88 | 6.168  |
| 1289 | 53 | 1 | 1 | 1 | 84   | 26.16 | 1.5  | 44 | 0 | 29   | 20.04 | 49.16 | 21.26 | 7.9253 |
| 1290 | 53 | 2 | 0 | 0 | 77.5 | 24.82 | 1.5  | 23 | 0 | 44.8 | 23.18 | 28.51 | 10.86 | 5.0962 |
| 1291 | 52 | 1 | 0 | 1 | 87   | 27.68 | 1.5  | 50 | 1 | 28.1 | 21.23 | 54.18 | 25.23 | 8.8876 |
| 1292 | 83 | 1 | 0 | 0 | 87   | 23.69 | 1.2  | 22 | 1 | 36.3 | 22.64 | 39.78 | 16.39 | 6.3234 |
| 1293 | 76 | 1 | 0 | 0 | 89   | 25.57 | 1.2  | 26 | 1 | 32.1 | 20.73 | 43.82 | 19.92 | 7.6381 |
| 1294 | 73 | 2 | 0 | 0 | 82   | 24.70 | 1.5  | 16 | 1 | 31.6 | 18.26 | 39.55 | 16.99 | 7.2115 |
| 1295 | 58 | 2 | 0 | 1 | 78.5 | 22.60 | 2    | 27 | 0 | 40.5 | 22.91 | 33.72 | 14.79 | 5.761  |

|      |    |   |   |   |      |       |      |    |   |      |       |       |       |        |
|------|----|---|---|---|------|-------|------|----|---|------|-------|-------|-------|--------|
| 1296 | 59 | 2 | 0 | 0 | 80   | 28.78 | 1.2  | 30 | 0 | 44.9 | 28.30 | 34.80 | 15.66 | 7.0528 |
| 1297 | 66 | 1 | 0 | 1 | 85   | 24.93 | 1.2  | 37 | 1 | 24.5 | 17.15 | 52.73 | 24.26 | 8.4235 |
| 1298 | 69 | 2 | 0 | 0 | 85   | 27.82 | 1.5  | 20 | 0 | 37.8 | 24.27 | 39.99 | 17.74 | 7.5774 |
| 1299 | 55 | 2 | 0 | 1 | 90   | 30.51 | 2    | 23 | 0 | 48.9 | 35.42 | 36.97 | 16.69 | 6.7785 |
| 1300 | 58 | 1 | 0 | 0 | 78   | 23.13 | 2    | 38 | 1 | 26.1 | 16.78 | 47.55 | 21.36 | 7.4979 |
| 1301 | 84 | 2 | 0 | 0 | 86.5 | 25.20 | 0.35 | 11 | 2 | 43.8 | 26.73 | 34.31 | 13.91 | 5.6058 |
| 1302 | 79 | 2 | 0 | 1 | 92.5 | 28.91 | 0.67 | 14 | 2 | 45.7 | 29.27 | 34.79 | 13.73 | 5.9431 |
| 1303 | 71 | 1 | 3 | 0 | 86   | 24.54 | 1.5  | 25 | 1 | 28.4 | 18.49 | 46.64 | 20.16 | 7.4497 |
| 1304 | 58 | 2 | 0 | 1 | 87   | 28.60 | 1.5  | 27 | 0 | 42.8 | 30.55 | 40.81 | 17.41 | 6.9732 |
| 1305 | 71 | 1 | 0 | 1 | 72   | 21.29 | 3    | 32 | 0 | 22.5 | 12.24 | 42.18 | 18.09 | 6.8764 |
| 1306 | 60 | 1 | 1 | 1 | 79   | 20.71 | 1.5  | 38 | 0 |      |       |       |       |        |
| 1307 | 50 | 2 | 0 | 0 | 72   | 22.30 | 1.5  | 33 | 0 | 28.3 | 15.47 | 39.11 | 17.10 | 6.7132 |
| 1308 | 59 | 1 | 1 | 1 | 90   | 25.51 | 2    | 40 | 0 | 27.2 | 18.99 | 50.80 | 24.13 | 8.5684 |
| 1309 | 57 | 1 | 1 | 1 | 78   | 22.51 | 1.2  | 26 | 2 | 8.7  | 4.73  | 49.33 | 21.84 | 8.6716 |
| 1310 | 57 | 1 | 3 | 1 | 84   | 26.49 | 2    | 40 | 0 | 22.1 | 15.73 | 55.58 | 25.12 | 9.2027 |
| 1311 | 54 | 2 | 0 | 0 | 95   | 24.93 | 2    | 26 | 0 | 34.4 | 21.63 | 41.19 | 18.44 | 7.2405 |
| 1312 | 52 | 2 | 0 | 0 | 72   | 23.77 | 1.5  | 34 | 0 | 36.7 | 21.28 | 36.68 | 15.99 | 6.4219 |
| 1313 | 72 | 2 | 3 | 0 | 89   | 29.11 | 0.86 | 19 | 1 | 43   | 27.71 | 36.77 | 13.78 | 6.2492 |
| 1314 | 54 | 2 | 3 | 0 | 80   | 22.06 | 1.5  | 19 | 0 | 33.6 | 16.39 | 32.37 | 12.10 | 5.41   |
| 1315 | 62 | 2 | 0 | 0 | 92   | 27.65 | 1.2  | 29 | 0 | 40.1 | 27.06 | 40.38 | 17.26 | 6.97   |
| 1316 | 73 | 1 | 3 | 1 | 96   | 26.53 | 1.5  | 31 | 1 | 23.5 | 16.87 | 54.81 | 24.40 | 8.75   |
| 1317 | 53 | 1 | 0 | 1 | 99   | 28.97 | 3    | 47 | 0 | 32.1 | 27.75 | 58.61 | 28.23 | 9.4    |
| 1318 | 75 | 2 | 0 | 0 | 72   | 24.17 | 1    | 29 | 1 | 42.4 | 25.00 | 33.92 | 14.52 | 5.84   |
| 1319 | 66 | 1 | 0 | 1 | 90   | 24.25 | 2    | 34 | 0 | 23.6 | 16.06 | 52.07 | 23.56 | 8.38   |
| 1320 | 62 | 1 | 1 | 1 | 96   | 26.51 | 1.5  | 31 | 0 | 35.7 | 24.84 | 44.68 | 19.75 | 7.41   |
| 1321 | 57 | 1 | 0 | 0 | 81   | 24.54 | 2    | 45 | 0 | 26.4 | 17.47 | 48.74 | 22.45 | 8.29   |
| 1322 | 52 | 2 | 0 | 0 | 73   | 26.27 | 1.5  | 29 | 0 | 37.9 | 22.09 | 36.14 | 15.41 | 6.85   |
| 1323 | 60 | 1 | 1 | 1 | 80   | 21.72 | 2    | 39 | 0 | 21.5 | 13.03 | 47.69 | 20.93 | 7.41   |
| 1324 | 63 | 2 | 0 | 0 | 90   | 31.00 | 1.5  | 31 | 0 | 42.4 | 29.88 | 40.63 | 17.99 | 7.5    |
| 1325 | 54 | 1 | 1 | 0 | 90   | 27.64 | 2    | 43 | 0 | 27   | 22.97 | 62.16 | 29.69 | 9.55   |
| 1326 | 85 | 1 | 0 | 1 | 87   | 23.00 | 1.5  | 23 | 1 | 15.9 | 10.73 | 56.94 | 24.34 | 8.39   |
| 1327 | 70 | 1 | 0 | 0 | 99   | 28.75 | 1.2  | 27 | 2 | 30.7 | 24.23 | 54.67 | 23.61 | 8.22   |
| 1328 | 67 | 2 | 0 | 1 | 79   | 23.80 | 2    | 11 | 1 | 39   | 22.25 | 34.81 | 15.27 | 6.3    |
| 1329 | 55 | 1 | 3 | 1 | 94   | 27.47 | 1.5  | 47 | 0 | 31.9 | 22.31 | 47.65 | 22.08 | 8.41   |
| 1330 | 60 | 1 | 0 | 1 | 88   | 27.95 | 1.5  | 39 | 0 | 32.8 | 23.02 | 47.14 | 22.17 | 8.49   |
| 1331 | 63 | 1 | 0 | 1 | 79   | 24.42 | 1.5  | 29 | 1 | 21.9 | 12.93 | 46.14 | 20.14 | 8.31   |
| 1332 | 55 | 2 | 0 | 0 | 82   | 26.56 | 2    | 18 | 0 | 41.8 | 26.80 | 37.32 | 16.40 | 6.77   |
| 1333 | 67 | 2 | 0 | 0 | 82   | 25.55 | 1.5  | 19 | 0 | 38.6 | 24.88 | 39.64 | 16.80 | 6.56   |
| 1334 | 53 | 1 | 0 | 1 | 121  | 43.54 | 2    | 51 | 0 | 41.8 | 48.91 | 68.02 | 28.44 | 9.99   |
| 1335 | 62 | 2 | 0 | 0 | 69   | 23.88 | 2    | 22 | 1 | 35.8 | 18.61 | 33.39 | 14.09 | 6.37   |
| 1336 | 69 | 2 | 0 | 0 | 85   | 24.89 | 1.2  | 32 | 0 | 36.9 | 22.93 | 39.25 | 17.39 | 6.91   |
| 1337 | 70 | 2 | 0 | 0 | 86   | 28.81 | 1.2  | 16 | 1 | 42.9 | 25.57 | 34.07 | 14.62 | 7.02   |
| 1338 | 56 | 1 | 0 | 0 | 80   | 25.16 | 2    | 48 | 0 | 24.7 | 18.81 | 57.34 | 25.62 | 8.23   |
| 1339 | 67 | 1 | 3 | 0 | 84   | 23.85 | 1    | 42 | 2 | 25.3 | 16.02 | 47.30 | 19.95 | 7.52   |
| 1340 | 55 | 2 | 0 | 0 | 95   | 26.51 | 2    | 18 | 0 | 35.7 | 21.89 | 39.41 | 16.55 | 6.99   |
| 1341 | 70 | 2 | 0 | 0 | 88   | 22.92 | 1.5  | 25 | 0 | 38.1 | 21.41 | 34.80 | 14.93 | 6.03   |
| 1342 | 60 | 2 | 0 | 0 | 67   | 17.51 | 1.5  | 26 | 0 | 23.4 | 10.83 | 35.45 | 14.97 | 5.6    |
| 1343 | 55 | 1 | 1 | 0 | 79   | 22.38 | 2    | 36 | 1 | 25.3 | 15.25 | 45.06 | 20.39 | 7.44   |
| 1344 | 55 | 1 | 3 | 0 | 87   | 25.27 | 1.5  | 28 | 1 | 27.8 | 19.30 | 50.05 | 22.53 | 8.04   |
| 1345 | 55 | 1 | 0 | 1 | 89   | 26.07 | 2    | 39 | 0 | 30.4 | 19.05 | 43.65 | 18.71 | 7.55   |
| 1346 | 62 | 2 | 0 | 1 | 64   | 19.40 | 1.2  | 16 | 1 | 33   | 15.61 | 31.69 | 12.88 | 5.17   |
| 1347 | 59 | 1 | 3 | 0 | 85   | 24.99 | 2    | 50 | 0 | 29.1 | 22.11 | 53.91 | 24.25 | 7.96   |
| 1348 | 52 | 2 | 0 | 0 | 75.5 | 22.02 | 2    | 23 | 0 | 38.6 | 20.53 | 32.70 | 14.48 | 5.98   |
| 1349 | 58 | 2 | 0 | 0 | 70   | 19.45 | 1.5  | 21 | 0 | 23.6 | 11.18 | 36.19 | 14.69 | 6.03   |
| 1350 | 61 | 2 | 0 | 0 | 89   | 30.07 | 1.5  | 23 | 0 | 43.7 | 31.57 | 40.68 | 17.87 | 7.53   |
| 1351 | 80 | 1 | 1 | 0 | 82.5 | 22.44 | 1.5  | 32 | 0 | 22.9 | 12.81 | 43.09 | 18.22 | 7.29   |
| 1352 | 72 | 2 | 0 | 0 | 76   | 21.44 | 1.5  | 22 | 0 | 34.4 | 17.69 | 33.69 | 14.08 | 5.81   |
| 1353 | 75 | 2 | 0 | 0 | 89   | 24.71 | 1.5  | 22 | 0 | 34.1 | 20.17 | 39.01 | 15.73 | 6.45   |
| 1354 | 59 | 1 | 0 | 1 | 85   | 24.00 | 2    | 55 | 0 | 20.1 | 14.68 | 58.34 | 25.73 | 8.52   |
| 1355 | 62 | 1 | 0 | 1 | 95.5 | 31.50 | 2    | 50 | 0 | 27.9 | 25.06 | 64.67 | 28.90 | 10.05  |
| 1356 | 66 | 2 | 0 | 1 | 70   | 22.61 | 2    | 23 | 0 | 39.9 | 22.05 | 33.15 | 15.14 | 6.19   |
| 1357 | 61 | 1 | 0 | 0 | 100  | 31.11 | 1.5  | 42 | 1 | 35.4 | 32.23 | 58.83 | 26.23 | 8.77   |
| 1358 | 54 | 2 | 0 | 1 | 75   | 23.40 | 1.5  | 29 | 0 | 43.6 | 25.37 | 32.75 | 13.33 | 5.29   |
| 1359 | 65 | 2 | 0 | 0 | 89   | 27.01 | 2    | 22 | 0 | 44.9 | 26.75 | 32.84 | 14.99 | 6.68   |
| 1360 | 70 | 1 | 0 | 1 | 86   | 25.91 | 1.5  | 42 | 0 | 28.3 | 17.14 | 43.44 | 19.81 | 8.26   |
| 1361 | 64 | 1 | 0 | 0 | 93   | 26.96 | 2    | 35 | 0 | 27.9 | 20.41 | 52.75 | 23.01 | 8.37   |
| 1362 | 62 | 2 | 0 | 1 | 93.5 | 27.23 | 1.2  | 20 | 0 | 40.6 | 25.98 | 38.02 | 14.99 | 6.38   |
| 1363 | 57 | 1 | 3 | 1 | 85   | 27.18 | 2    | 39 | 0 | 28.9 | 21.75 | 53.39 | 25.28 | 8.95   |
| 1364 | 56 | 1 | 0 | 0 | 90   | 29.28 | 3    | 40 | 0 | 39.1 | 28.87 | 45.05 | 20.38 | 7.71   |
| 1365 | 52 | 1 | 1 | 1 | 85   | 24.73 | 2    | 36 | 0 | 23.4 | 16.37 | 53.49 | 24.02 | 8.26   |
| 1366 | 52 | 2 | 0 | 0 | 78   | 23.06 | 2    | 24 | 0 | 30.8 | 16.37 | 36.84 | 15.02 | 6.42   |
| 1367 | 59 | 2 | 0 | 0 | 95   | 31.57 | 1.2  | 24 | 0 | 47.6 | 33.08 | 36.38 | 14.81 | 6.82   |

|      |    |   |   |   |      |       |      |    |   |      |       |       |       |      |
|------|----|---|---|---|------|-------|------|----|---|------|-------|-------|-------|------|
| 1368 | 75 | 2 | 0 | 0 | 78   | 24.00 | 0.86 | 13 | 2 | 42.9 | 24.58 | 32.68 | 13.67 | 5.7  |
| 1369 | 57 | 1 | 1 | 1 | 86.5 | 25.38 | 1.5  | 42 | 0 | 26.9 | 19.56 | 53.10 | 24.02 | 8.28 |
| 1370 | 54 | 2 | 0 | 1 | 79   | 24.79 | 1.5  | 30 | 0 | 32.5 | 18.23 | 37.89 | 17.08 | 7.48 |
| 1371 | 76 | 1 | 3 | 0 | 84   | 27.37 | 1.2  | 32 | 1 | 30.6 | 19.31 | 43.72 | 20.21 | 7.99 |
| 1372 | 72 | 1 | 0 | 0 | 87   | 24.24 | 0.6  | 24 | 2 | 27.9 | 17.33 | 44.81 | 18.97 | 7.38 |
| 1373 | 60 | 2 | 0 | 0 | 79   | 23.97 | 1.5  | 14 | 1 | 31.6 | 16.39 | 35.53 | 13.60 | 6.15 |
| 1374 | 57 | 2 | 0 | 0 | 75   | 22.07 | 2    | 21 | 0 | 32.6 | 18.24 | 37.65 | 16.79 | 6.64 |
| 1375 | 61 | 2 | 0 | 0 | 94   | 27.50 | 1.5  | 18 | 1 | 36.4 | 26.19 | 45.82 | 20.13 | 7.51 |
| 1376 | 73 | 1 | 0 | 1 | 83   | 22.96 | 2    | 34 | 0 | 21.7 | 12.65 | 45.70 | 19.76 | 7.61 |
| 1377 | 57 | 2 | 0 | 0 | 85   | 25.07 | 2    | 16 | 1 | 44.1 | 27.59 | 34.99 | 15.22 | 6.03 |
| 1378 | 58 | 1 | 0 | 0 | 85   | 22.44 | 2    | 42 | 0 | 24.3 | 15.09 | 46.93 | 21.75 | 7.66 |
| 1379 | 63 | 2 | 0 | 0 | 79   | 20.95 | 1.5  | 18 | 0 | 41.6 | 21.46 | 30.14 | 12.55 | 4.97 |
| 1380 | 58 | 2 | 0 | 0 | 89.5 | 27.47 | 2    | 27 | 0 | 37.1 | 28.01 | 47.47 | 21.05 | 7.43 |
| 1381 | 72 | 2 | 0 | 0 | 70.5 | 20.60 | 1.2  | 22 | 0 | 32.5 | 14.74 | 30.61 | 12.17 | 5.57 |
| 1382 | 58 | 2 | 0 | 0 | 74   | 22.16 | 1.5  | 16 | 1 | 33.3 | 16.68 | 33.38 | 14.50 | 6.3  |
| 1383 | 53 | 2 | 0 | 0 | 81   | 20.63 | 2    | 23 | 0 | 32.9 | 16.08 | 32.78 | 13.95 | 5.73 |
| 1384 | 52 | 1 | 0 | 1 | 78   | 21.22 | 2    | 33 | 0 | 20   | 10.76 | 42.96 | 18.91 | 7.29 |
| 1385 | 63 | 1 | 1 | 1 | 104  | 31.71 | 1.5  | 32 | 0 | 37.5 | 30.35 | 50.54 | 21.94 | 8.46 |
| 1386 | 54 | 1 | 0 | 1 | 82   | 24.26 | 2    | 43 | 0 | 24   | 14.88 | 47.00 | 21.12 | 8.11 |
| 1387 | 56 | 2 | 0 | 0 | 90   | 22.29 | 2    | 21 | 1 | 37.9 | 19.47 | 31.89 | 13.54 | 5.86 |
| 1388 | 60 | 2 | 0 | 0 | 83   | 23.18 | 2    | 18 | 1 | 38.8 | 21.08 | 33.18 | 13.57 | 5.68 |
| 1389 | 61 | 1 | 1 | 1 | 70   | 23.93 | 1.5  | 33 | 0 | 14   | 7.45  | 45.86 | 20.09 | 8.74 |
| 1390 | 59 | 2 | 0 | 1 | 110  | 33.10 | 2    | 30 | 0 | 52   | 37.22 | 34.33 | 14.31 | 6.48 |
| 1391 | 58 | 1 | 0 | 0 | 87   | 25.34 | 3    | 33 | 0 | 28   | 19.95 | 51.30 | 22.87 | 7.95 |
| 1392 | 53 | 1 | 0 | 0 | 82.5 | 26.85 | 1.5  | 39 | 0 | 26.1 | 19.06 | 53.88 | 24.60 | 8.95 |
| 1393 | 75 | 1 | 0 | 0 | 95   | 24.37 | 1.2  | 27 | 1 | 32.9 | 21.65 | 44.23 | 19.93 | 7.16 |
| 1394 | 65 | 2 | 0 | 0 | 68   | 20.73 | 1    | 12 | 1 | 37.7 | 17.53 | 28.94 | 11.70 | 5.19 |
| 1395 | 54 | 2 | 0 | 0 | 67   | 18.98 | 1.5  | 29 | 0 | 26.5 | 11.86 | 32.96 | 14.56 | 6.12 |
| 1396 | 58 | 1 | 0 | 0 | 91   | 26.58 | 2    | 41 | 0 | 23.4 | 16.94 | 55.39 | 25.40 | 9.26 |
| 1397 | 56 | 1 | 1 | 1 | 93   | 27.93 | 2    | 41 | 1 | 29.6 | 24.34 | 57.99 | 25.85 | 8.65 |
| 1398 | 55 | 2 | 0 | 0 | 88   | 24.06 | 2    | 23 | 0 | 38.4 | 20.31 | 32.54 | 12.52 | 5.71 |
| 1399 | 57 | 1 | 1 | 1 | 82   | 24.25 | 2    | 41 | 0 | 21.1 | 13.05 | 48.85 | 20.98 | 8.06 |
| 1400 | 79 | 1 | 0 | 1 | 92   | 23.86 | 0.75 | 25 | 2 | 33.2 | 21.56 | 43.43 | 18.40 | 6.65 |
| 1401 | 70 | 1 | 0 | 0 | 85   | 23.26 | 1.5  | 36 | 1 | 29.8 | 19.75 | 46.49 | 19.98 | 6.83 |
| 1402 | 59 | 2 | 1 | 0 | 77   | 24.79 | 1.5  | 25 | 0 | 43.5 | 27.58 | 35.83 | 15.84 | 6.17 |
| 1403 | 57 | 2 | 0 | 0 | 91   | 28.20 | 1.2  | 19 | 1 | 45.6 | 27.60 | 32.97 | 12.87 | 5.94 |
| 1404 | 54 | 1 | 0 | 1 | 79   | 22.18 | 2    | 38 | 0 | 24.8 | 14.96 | 45.28 | 20.78 | 7.47 |
| 1405 | 62 | 2 | 0 | 0 | 82   | 25.55 | 1.2  | 22 | 0 | 42.9 | 25.91 | 34.45 | 14.75 | 6.15 |
| 1406 | 76 | 1 | 0 | 0 | 78.5 | 21.65 | 2    | 29 | 0 | 18.4 | 10.47 | 46.28 | 20.11 | 7.75 |
| 1407 | 53 | 2 | 0 | 1 | 79   | 24.37 | 2    | 17 | 1 | 26.8 | 15.34 | 42.00 | 17.83 | 7.44 |
| 1408 | 72 | 2 | 0 | 0 | 80   | 21.60 | 0.86 | 8  | 1 | 23.6 | 11.41 | 36.85 | 16.37 | 7.38 |
| 1409 | 63 | 2 | 0 | 0 | 87   | 24.30 | 1.5  | 26 | 1 | 39.3 | 22.27 | 34.42 | 14.98 | 6.37 |
| 1410 | 56 | 1 | 1 | 0 | 75   | 21.36 | 2    | 32 | 0 | 11.1 | 6.82  | 54.48 | 23.77 | 8.25 |
| 1411 | 55 | 1 | 3 | 1 | 83   | 27.41 | 3    | 53 | 0 | 27.7 | 21.83 | 56.89 | 26.28 | 9.06 |
| 1412 | 53 | 1 | 1 | 0 | 72   | 18.79 | 1.5  | 40 | 0 | 13.6 | 6.81  | 43.19 | 18.51 | 6.88 |
| 1413 | 79 | 2 | 0 | 0 | 88   | 28.88 | 0.75 | 7  | 2 | 37   | 21.54 | 36.74 | 13.57 | 6.71 |
| 1414 | 79 | 1 | 0 | 0 | 77   | 22.74 | 1    | 18 | 2 | 20.4 | 10.18 | 39.83 | 16.78 | 7.66 |
| 1415 | 57 | 2 | 0 | 0 | 79   | 24.47 | 1.5  | 22 | 1 | 30.3 | 18.49 | 42.51 | 18.28 | 7.33 |
| 1416 | 54 | 2 | 0 | 0 | 71.5 | 23.23 | 3    | 28 | 1 | 37.7 | 20.55 | 34.02 | 15.17 | 6.4  |
| 1417 | 50 | 2 | 0 | 0 | 83   | 21.02 | 2    | 25 | 0 | 25   | 12.22 | 36.64 | 15.28 | 6.53 |
| 1418 | 55 | 1 | 3 | 1 | 68   | 19.54 | 2    | 44 | 0 | 8.3  | 4.72  | 52.24 | 23.48 | 7.99 |
| 1419 | 56 | 1 | 3 | 0 | 92   | 29.39 | 2    | 43 | 0 | 29.1 | 23.18 | 56.41 | 24.62 | 8.93 |
| 1420 | 54 | 2 | 0 | 1 | 74   | 20.95 | 2    | 14 | 1 | 42.1 | 21.31 | 29.29 | 12.45 | 5.06 |
| 1421 | 81 | 1 | 0 | 0 | 94   | 25.74 | 2    | 25 | 1 | 32.1 | 21.04 | 44.43 | 19.05 | 7.18 |
| 1422 | 80 | 2 | 0 | 0 | 74   | 20.38 | 1.5  | 14 | 1 | 30.6 | 13.30 | 30.11 | 11.57 | 5.2  |
| 1423 | 60 | 2 | 0 | 0 | 84   | 26.01 | 1.5  | 15 | 1 | 38.9 | 25.26 | 39.67 | 16.45 | 6.38 |
| 1424 | 57 | 1 | 3 | 0 | 86   | 24.80 | 2    | 47 | 1 | 21.1 | 14.62 | 54.69 | 24.71 | 8.51 |
| 1425 | 62 | 2 | 0 | 0 | 99   | 30.56 | 1.2  | 19 | 1 | 48.3 | 34.20 | 36.56 | 16.62 | 7.1  |
| 1426 | 63 | 1 | 0 | 0 | 103  | 29.69 | 2    | 28 | 1 | 36.5 | 29.82 | 51.97 | 21.98 | 7.92 |
| 1427 | 55 | 2 | 0 | 0 | 78   | 22.76 | 2    | 25 | 1 | 35.6 | 18.87 | 34.13 | 14.63 | 6.17 |
| 1428 | 64 | 2 | 0 | 0 | 86.5 | 28.57 | 1.5  | 24 | 1 | 44.6 | 28.51 | 35.35 | 14.02 | 6.07 |
| 1429 | 54 | 1 | 0 | 0 | 86   | 25.25 | 2    | 48 | 0 | 25.4 | 17.26 | 50.71 | 23.81 | 8.53 |
| 1430 | 56 | 1 | 3 | 0 | 83   | 25.84 | 2    | 51 | 0 | 24   | 16.38 | 52.01 | 23.34 | 8.6  |
| 1431 | 59 | 2 | 0 | 0 | 88   | 24.92 | 1.5  | 19 | 0 | 31.4 | 17.77 | 38.85 | 16.05 | 6.95 |
| 1432 | 64 | 1 | 0 | 0 | 83.5 | 23.43 | 1.5  | 43 | 1 | 31.4 | 20.69 | 45.18 | 18.16 | 6.21 |
| 1433 | 57 | 2 | 0 | 0 | 92   | 33.78 | 1.5  | 17 | 1 | 51.6 | 37.42 | 35.12 | 15.10 | 6.89 |
| 1434 | 79 | 1 | 0 | 0 | 94.5 | 26.56 | 1.5  | 26 | 1 | 27.8 | 21.98 | 57.19 | 25.10 | 8.37 |
| 1435 | 55 | 1 | 0 | 0 | 79   | 19.96 | 3    | 36 | 0 | 19.6 | 11.06 | 45.47 | 20.31 | 7.11 |
| 1436 | 55 | 2 | 0 | 0 | 60   | 14.85 | 2    | 17 | 1 | 23.2 | 8.57  | 28.41 | 11.38 | 4.5  |
| 1437 | 55 | 1 | 1 | 1 | 87   | 28.46 | 2    | 44 | 0 | 30   | 24.56 | 57.34 | 24.90 | 8.42 |
| 1438 | 50 | 2 | 0 | 0 | 72   | 22.76 | 2    | 22 | 1 | 31.8 | 17.71 | 37.92 | 16.85 | 6.77 |
| 1439 | 66 | 1 | 0 | 0 | 72   | 21.77 | 2    | 44 | 0 | 11.2 | 6.09  | 48.15 | 22.18 | 8.65 |

|      |    |   |   |   |      |       |      |    |   |      |       |       |       |      |
|------|----|---|---|---|------|-------|------|----|---|------|-------|-------|-------|------|
| 1440 | 74 | 2 | 0 | 0 | 70   | 19.63 | 1.5  | 22 | 1 | 20.9 | 9.11  | 34.48 | 13.14 | 6    |
| 1441 | 52 | 1 | 0 | 1 | 90   | 22.59 | 2    | 42 | 0 | 22.5 | 15.06 | 52.00 | 23.66 | 7.65 |
| 1442 | 54 | 2 | 0 | 0 | 92   | 28.21 | 1.5  | 15 | 1 | 47.9 | 30.02 | 32.60 | 13.62 | 5.97 |
| 1443 | 58 | 2 | 0 | 0 | 82   | 24.26 | 2    | 22 | 0 | 37.5 | 20.85 | 34.70 | 15.19 | 6.36 |
| 1444 | 61 | 1 | 0 | 0 | 81   | 25.64 | 2    | 30 | 0 | 26.8 | 16.06 | 43.87 | 20.16 | 8.23 |
| 1445 | 54 | 2 | 0 | 1 | 77   | 26.85 | 2    | 25 | 1 | 40.1 | 24.50 | 36.58 | 15.13 | 6.63 |
| 1446 | 58 | 2 | 0 | 0 | 67   | 20.09 | 1.39 | 20 | 1 | 35.7 | 16.54 | 29.81 | 12.69 | 5.44 |
| 1447 | 54 | 2 | 0 | 1 | 76   | 24.17 | 1.92 | 25 | 0 | 40.2 | 26.09 | 38.88 | 16.87 | 6.27 |
| 1448 | 68 | 2 | 0 | 0 | 75   | 18.86 | 1.7  | 20 | 1 | 28.8 | 13.12 | 32.52 | 13.55 | 5.65 |
| 1449 | 61 | 1 | 0 | 1 | 76   | 22.15 | 1.71 | 40 | 1 | 23.2 | 15.41 | 50.96 | 23.24 | 7.57 |
| 1450 | 73 | 1 | 3 | 1 | 82.5 | 19.01 | 1.27 | 35 | 0 | 11.7 | 5.61  | 42.50 | 18.29 | 6.97 |
| 1451 | 71 | 2 | 0 | 0 | 83   | 28.17 | 0.95 | 15 | 2 | 42.1 | 26.18 | 36.02 | 14.43 | 6.36 |
| 1452 | 54 | 1 | 1 | 1 | 75   | 22.72 | 2.13 | 47 | 0 | 14.4 | 8.92  | 53.09 | 24.74 | 9.07 |
| 1453 | 51 | 2 | 0 | 1 | 77   | 22.73 | 1.88 | 22 | 0 | 36.2 | 18.44 | 32.48 | 13.82 | 6.14 |
| 1454 | 53 | 2 | 0 | 0 | 78   | 21.93 | 1.4  | 18 | 0 | 34.7 | 20.59 | 38.79 | 17.06 | 6.24 |
| 1455 | 59 | 1 | 0 | 0 | 82   | 25.36 | 2    | 32 | 1 | 23.5 | 14.13 | 46.02 | 19.69 | 8.23 |
| 1456 | 65 | 1 | 1 | 0 | 89   | 27.58 | 0.93 | 34 | 1 | 25.6 | 17.88 | 51.84 | 23.21 | 8.96 |
| 1457 | 54 | 2 | 0 | 0 | 69   | 21.43 | 2.52 | 31 | 1 | 31.6 | 17.97 | 38.93 | 16.91 | 6.28 |
| 1458 | 56 | 2 | 0 | 0 | 68   | 20.90 | 1.5  | 28 | 0 | 37.7 | 19.28 | 31.83 | 13.76 | 5.48 |
| 1459 | 54 | 1 | 1 | 1 | 90   | 25.58 | 1.75 | 48 | 0 | 33.3 | 25.31 | 50.75 | 23.56 | 7.74 |
| 1460 | 54 | 2 | 0 | 0 | 82   | 24.17 | 1.83 | 28 | 1 | 38.9 | 24.64 | 38.66 | 14.02 | 5.21 |
| 1461 | 57 | 2 | 0 | 0 | 97.5 | 38.28 | 1.19 | 29 | 0 | 53.1 | 45.75 | 40.44 | 17.03 | 7.34 |
| 1462 | 58 | 2 | 0 | 0 | 68.5 | 19.38 | 1.72 | 23 | 0 | 24.7 | 12.17 | 37.07 | 17.41 | 6.84 |
| 1463 | 51 | 2 | 0 | 0 | 83   | 26.94 | 1.37 | 18 | 1 | 39.7 | 26.28 | 39.85 | 16.88 | 6.56 |
| 1464 | 71 | 2 | 0 | 0 | 70   | 21.33 | 1.12 | 18 | 0 | 31.1 | 16.16 | 35.83 | 14.58 | 6.02 |
| 1465 | 73 | 2 | 0 | 0 | 77   | 23.42 | 1.35 | 16 | 1 | 32.4 | 16.65 | 34.68 | 14.76 | 6.65 |
| 1466 | 58 | 1 | 3 | 0 | 78   | 22.07 | 2.04 | 36 | 0 | 17   | 11.24 | 55.02 | 25.49 | 8.37 |
| 1467 | 58 | 2 | 0 | 0 | 74   | 22.19 | 2.18 | 29 | 0 | 43   | 25.19 | 33.38 | 14.22 | 5.22 |
| 1468 | 57 | 2 | 0 | 0 | 70   | 19.76 | 1.74 | 25 | 0 | 24.5 | 11.62 | 35.80 | 15.18 | 6.24 |
| 1469 | 54 | 2 | 0 | 0 | 72   | 23.86 | 1.56 | 31 | 0 | 37.1 | 20.04 | 33.93 | 14.39 | 6.19 |
| 1470 | 63 | 1 | 0 | 0 | 92   | 25.12 | 1.35 | 40 | 1 |      |       |       |       |      |
| 1471 | 64 | 1 | 0 | 0 | 90   | 23.26 | 1.14 | 40 | 1 | 22.9 | 16.37 | 55.11 | 24.19 | 7.78 |
| 1472 | 56 | 1 | 1 | 0 | 79   | 26.21 | 1.1  | 34 | 1 | 26.1 | 16.35 | 46.32 | 20.10 | 8.39 |
| 1473 | 61 | 2 | 0 | 0 | 76   | 24.49 | 1.85 | 26 | 0 | 42.2 | 25.35 | 34.77 | 13.99 | 5.69 |
| 1474 | 54 | 1 | 0 | 0 | 80   | 21.36 | 1.4  | 38 | 0 | 22.3 | 12.41 | 43.26 | 17.96 | 6.91 |
| 1475 | 51 | 2 | 0 | 0 | 90   | 25.46 | 1.71 | 25 | 0 | 36.4 | 25.85 | 45.17 | 19.80 | 7.1  |
| 1476 | 79 | 2 | 0 | 0 | 73   | 18.85 | 1    | 13 | 1 | 18.7 | 7.23  | 31.40 | 12.71 | 5.93 |
| 1477 | 78 | 1 | 1 | 0 | 90   | 21.41 | 0.85 | 17 | 2 | 15   | 8.56  | 48.53 | 19.32 | 7.01 |
| 1478 | 80 | 2 | 0 | 1 | 78   | 20.41 | 1.2  | 11 | 1 | 32.5 | 17.01 | 35.27 | 13.40 | 5.17 |
| 1479 | 60 | 1 | 1 | 1 | 80   | 21.46 | 1.64 | 32 | 1 | 25   | 14.91 | 44.66 | 19.67 | 6.98 |
| 1480 | 52 | 2 | 0 | 0 | 87   | 24.65 | 1.54 | 28 | 1 | 31   | 17.95 | 39.87 | 17.41 | 7.32 |
| 1481 | 58 | 1 | 3 | 1 | 89   | 25.21 | 1.2  | 34 | 1 | 21.6 | 15.11 | 54.85 | 23.82 | 8.54 |
| 1482 | 57 | 2 | 0 | 0 | 85   | 21.53 | 1.53 | 17 | 1 | 34.4 | 16.83 | 32.16 | 13.23 | 5.72 |
| 1483 | 55 | 2 | 0 | 0 | 80   | 22.50 | 1.58 | 27 | 0 | 39.8 | 21.05 | 31.84 | 13.37 | 5.48 |
| 1484 | 60 | 2 | 0 | 0 | 78   | 21.46 | 1.49 | 15 | 1 | 34.8 | 15.39 | 28.79 | 12.10 | 5.71 |
| 1485 | 58 | 1 | 3 | 0 | 85.5 | 26.39 | 1.93 | 33 | 1 | 28.8 | 20.69 | 51.21 | 23.04 | 8.34 |
| 1486 | 85 | 1 | 0 | 0 | 100  | 28.36 | 1.45 | 25 | 1 | 29.7 | 22.69 | 53.59 | 21.67 | 7.8  |
| 1487 | 53 | 2 | 0 | 0 | 94   | 29.20 | 1.01 | 23 | 1 | 44.1 | 29.35 | 37.23 | 15.40 | 6.62 |
| 1488 | 59 | 2 | 0 | 0 | 70   | 25.20 | 1.38 | 22 | 1 | 37.7 | 19.20 | 31.67 | 13.57 | 6.56 |
| 1489 | 59 | 1 | 0 | 0 | 74   | 22.11 | 1.08 | 29 | 1 | 19   | 11.23 | 47.75 | 20.72 | 7.47 |
| 1490 | 72 | 1 | 3 | 0 | 103  | 29.13 | 1.69 | 36 | 0 | 34.4 | 26.50 | 50.64 | 22.48 | 8.23 |
| 1491 | 65 | 1 | 0 | 0 | 94   | 23.31 | 2    | 38 | 0 | 26.9 | 19.92 | 54.03 | 24.19 | 7.61 |
| 1492 | 56 | 2 | 0 | 0 | 67.5 | 19.03 | 1.32 | 13 | 1 | 24.8 | 11.21 | 34.03 | 14.30 | 6.06 |
| 1493 | 55 | 1 | 0 | 0 | 87   | 26.20 | 1.67 | 43 | 0 | 27.3 | 19.01 | 50.67 | 23.34 | 8.47 |
| 1494 | 54 | 2 | 0 | 0 | 67   | 20.73 | 2.43 | 23 | 0 | 28.6 | 13.32 | 33.27 | 13.95 | 6.23 |
| 1495 | 71 | 1 | 0 | 1 | 85   | 24.38 | 1.85 | 32 | 0 | 18   | 12.02 | 54.65 | 23.81 | 8.33 |
| 1496 | 55 | 2 | 0 | 0 | 80   | 23.28 | 2.34 | 21 | 1 | 35.7 | 19.60 | 35.27 | 14.42 | 5.88 |
| 1497 | 63 | 2 | 0 | 0 | 85.5 | 25.85 | 1.25 | 13 | 1 | 41.2 | 23.33 | 33.33 | 14.17 | 6.24 |
| 1498 | 59 | 2 | 0 | 0 | 77.5 | 24.43 | 1.19 | 23 | 0 | 34.2 | 18.11 | 34.80 | 14.99 | 6.7  |
| 1499 | 58 | 1 | 0 | 0 | 79   | 21.85 | 1.44 | 22 | 1 | 28.8 | 17.05 | 42.09 | 18.73 | 6.56 |
| 1500 | 54 | 2 | 0 | 1 | 67   | 20.13 | 2.75 | 24 | 1 | 31.5 | 14.36 | 31.17 | 13.19 | 5.42 |
| 1501 | 57 | 2 | 0 | 0 | 84   | 23.40 | 1.5  | 30 | 1 | 37.7 | 23.04 | 38.13 | 16.40 | 6.02 |
| 1502 | 72 | 2 | 0 | 0 | 79.5 | 25.31 | 0.95 | 9  | 2 | 39.4 | 20.55 | 31.59 | 12.72 | 6.17 |
| 1503 | 50 | 2 | 0 | 1 | 60   | 18.96 | 1.67 | 27 | 0 | 25.8 | 11.57 | 33.31 | 14.78 | 5.84 |
| 1504 | 66 | 2 | 0 | 0 | 76   | 21.66 | 1.09 | 16 | 2 | 39.7 | 21.09 | 32.01 | 13.66 | 5.48 |
| 1505 | 63 | 2 | 0 | 0 | 92   | 26.37 | 1.06 | 19 | 1 | 39.8 | 24.48 | 37.05 | 13.97 | 5.87 |
| 1506 | 72 | 1 | 3 | 1 | 91   | 28.29 | 1.45 | 32 | 0 | 25   | 78.58 | 55.81 | 25.07 | 9.18 |
| 1507 | 55 | 1 | 0 | 0 | 86   | 23.88 | 1.45 | 37 | 0 | 29.3 | 18.65 | 44.97 | 19.31 | 7.17 |
| 1508 | 50 | 2 | 0 | 0 | 72   | 23.59 | 1.75 | 23 | 1 | 39.4 | 23.45 | 36.03 | 15.80 | 6.23 |
| 1509 | 61 | 1 | 0 | 1 | 94   | 24.03 | 1.6  | 31 | 1 | 23.9 | 15.96 | 50.77 | 22.50 | 7.76 |
| 1510 | 60 | 2 | 0 | 0 | 76   | 20.34 | 1.33 | 29 | 0 | 32.2 | 17.28 | 36.39 | 15.55 | 5.76 |
| 1511 | 55 | 1 | 0 | 1 | 83   | 24.66 | 1.25 | 28 | 1 | 31.9 | 21.23 | 45.32 | 20.38 | 7.41 |

|      |    |   |   |   |      |       |      |    |   |      |       |       |       |       |
|------|----|---|---|---|------|-------|------|----|---|------|-------|-------|-------|-------|
| 1512 | 69 | 2 | 0 | 0 | 82   | 30.22 | 1.09 | 18 | 1 | 44.6 | 26.02 | 32.38 | 13.96 | 6.21  |
| 1513 | 69 | 1 | 3 | 1 | 75   | 21.72 | 1.26 | 17 | 1 | 9.3  | 5.10  | 49.63 | 22.15 | 8.44  |
| 1514 | 79 | 1 | 1 | 0 | 88   | 23.68 | 0.94 | 16 | 2 | 21.3 | 13.13 | 48.49 | 22.22 | 8.22  |
| 1515 | 70 | 2 | 0 | 0 | 74   | 24.91 | 1.02 | 16 | 1 | 34.6 | 18.29 | 34.61 | 12.67 | 5.56  |
| 1516 | 62 | 1 | 1 | 1 | 95.5 | 27.77 | 1.03 | 31 | 1 | 31   | 23.51 | 52.26 | 22.55 | 8.28  |
| 1517 | 55 | 2 | 0 | 0 | 82   | 27.49 | 1.49 | 21 | 0 | 38.1 | 23.65 | 38.47 | 16.27 | 6.86  |
| 1518 | 76 | 2 | 0 | 0 | 94   | 26.25 | 1.14 | 27 | 1 |      |       |       |       |       |
| 1519 | 63 | 1 | 1 | 0 | 83   | 22.30 | 1.51 | 35 | 0 | 20.3 | 12.85 | 50.53 | 22.57 | 7.72  |
| 1520 | 56 | 2 | 0 | 0 | 89   | 27.71 | 1.24 | 31 | 0 | 42.9 | 30.71 | 40.83 | 17.53 | 6.5   |
| 1521 | 50 | 2 | 0 | 0 | 93   | 26.96 | 1.48 | 26 | 1 | 32.8 | 19.18 | 39.36 | 16.61 | 7.25  |
| 1522 | 77 | 1 | 1 | 0 | 90.5 | 24.06 | 2    | 30 | 0 | 24.6 | 15.76 | 48.42 | 22.00 | 8.17  |
| 1523 | 55 | 1 | 3 | 1 | 90   | 26.88 | 2.06 | 35 | 0 | 28.4 | 22.31 | 56.26 | 24.32 | 8.21  |
| 1524 | 55 | 2 | 0 | 0 | 72   | 23.56 | 1.38 | 8  | 1 | 37.7 | 21.73 | 35.85 | 15.11 | 6.11  |
| 1525 | 59 | 2 | 0 | 0 | 80   | 22.41 | 1.29 | 24 | 0 | 32.5 | 18.39 | 38.11 | 16.51 | 6.46  |
| 1526 | 59 | 2 | 0 | 0 | 91   | 24.52 | 1.56 | 25 | 0 | 33.3 | 21.49 | 42.97 | 18.09 | 6.85  |
| 1527 | 60 | 2 | 0 | 0 | 62   | 21.23 | 1.22 | 21 | 0 | 32.1 | 14.54 | 30.73 | 12.39 | 5.66  |
| 1528 | 52 | 2 | 0 | 0 | 78   | 21.99 | 1.35 | 24 | 0 | 32.8 | 17.73 | 36.25 | 15.61 | 6.15  |
| 1529 | 66 | 2 | 0 | 0 | 96   | 25.28 | 0.94 | 14 | 2 | 36   | 18.55 | 32.94 | 14.18 | 6.97  |
| 1530 | 71 | 2 | 0 | 0 | 74   | 22.07 | 1.08 | 21 | 1 | 28.3 | 14.96 | 37.85 | 16.56 | 6.69  |
| 1531 | 68 | 2 | 0 | 0 | 71   | 20.83 | 1.48 | 24 | 0 | 31.1 | 15.86 | 35.11 | 14.84 | 5.94  |
| 1532 | 73 | 1 | 3 | 0 | 104  | 25.86 | 0.42 | 27 | 2 | 33.9 | 23.10 | 45.06 | 19.39 | 7.12  |
| 1533 | 63 | 2 | 0 | 0 | 74   | 22.59 | 1.63 | 21 | 0 | 36.8 | 19.14 | 32.85 | 14.16 | 6     |
| 1534 | 65 | 2 | 0 | 0 | 82   | 26.55 | 1.11 | 16 | 1 | 41.7 | 23.11 | 32.32 | 12.41 | 5.75  |
| 1535 | 70 | 2 | 0 | 0 | 69.5 | 20.87 | 1.55 | 18 | 0 | 28.6 | 14.29 | 35.74 | 14.20 | 5.88  |
| 1536 | 52 | 2 | 0 | 1 | 88   | 25.35 | 1.4  | 27 | 0 | 41.1 | 27.39 | 39.26 | 17.13 | 6.53  |
| 1537 | 52 | 2 | 0 | 0 | 91   | 25.94 | 1.26 | 17 | 1 | 39.7 | 21.55 | 32.78 | 13.67 | 6.45  |
| 1538 | 77 | 1 | 0 | 1 | 86   | 22.98 | 0.98 | 21 | 1 | 26.3 | 14.92 | 41.90 | 17.18 | 6.93  |
| 1539 | 52 | 2 | 0 | 0 | 79   | 22.29 | 1.57 | 25 | 0 | 35.4 | 17.07 | 31.16 | 12.71 | 5.54  |
| 1540 | 65 | 1 | 1 | 1 | 98   | 26.60 | 1.33 | 31 | 0 | 30   | 21.25 | 49.52 | 21.89 | 7.95  |
| 1541 | 77 | 1 | 3 | 0 | 84.5 | 22.91 | 1.55 | 30 | 0 | 25.2 | 14.64 | 43.45 | 19.17 | 7.33  |
| 1542 | 57 | 1 | 1 | 1 | 90   | 24.23 | 1.3  | 39 | 1 | 24.2 | 17.34 | 54.40 | 23.86 | 7.9   |
| 1543 | 54 | 2 | 0 | 0 | 94   | 30.05 | 1.3  | 21 | 0 | 43.2 | 31.49 | 41.45 | 17.95 | 7.15  |
| 1544 | 58 | 1 | 1 | 0 | 82   | 20.36 | 1.53 | 40 | 1 | 15.3 | 8.78  | 48.54 | 19.01 | 6.52  |
| 1545 | 71 | 2 | 0 | 0 | 76   | 21.34 | 1.24 | 20 | 0 | 29.9 | 15.90 | 37.21 | 16.11 | 6.24  |
| 1546 | 74 | 1 | 3 | 0 | 72.5 | 21.94 | 0.93 | 26 | 1 | 24.3 | 13.41 | 41.76 | 17.73 | 6.76  |
| 1547 | 61 | 2 | 0 | 0 | 98   | 29.93 | 1.04 | 12 | 2 | 40.1 | 24.92 | 37.20 | 12.91 | 6.03  |
| 1548 | 67 | 1 | 0 | 0 | 87   | 24.95 | 1.61 | 35 | 1 | 23.5 | 15.49 | 50.39 | 22.57 | 8.5   |
| 1549 | 75 | 2 | 0 | 1 | 96.5 | 26.76 | 0.72 | 16 | 1 | 36.4 | 20.24 | 35.41 | 14.28 | 6.72  |
| 1550 | 77 | 1 | 3 | 1 | 89   | 25.53 | 1.16 | 34 | 1 | 23.3 | 14.63 | 48.05 | 19.89 | 7.95  |
| 1551 | 50 | 2 | 0 | 0 | 98.5 | 34.71 | 1.16 | 16 | 2 | 53   | 40.90 | 36.31 | 16.00 | 6.9   |
| 1552 | 53 | 2 | 0 | 0 | 72   | 23.13 | 1.41 | 28 | 1 | 37   | 19.46 | 33.10 | 13.54 | 5.82  |
| 1553 | 61 | 1 | 3 | 1 | 78   | 21.76 | 2    | 34 | 0 | 16.5 | 9.15  | 46.30 | 20.11 | 8.04  |
| 1554 | 57 | 2 | 0 | 0 | 94.5 | 23.81 | 1.74 | 23 | 1 | 37.7 | 20.35 | 33.68 | 14.14 | 6.14  |
| 1555 | 53 | 2 | 0 | 0 | 76   | 25.77 | 1.38 | 23 | 0 | 37.6 | 21.30 | 35.34 | 14.70 | 6.53  |
| 1556 | 58 | 2 | 0 | 0 | 78   | 23.56 | 1.83 | 26 | 0 | 38.5 | 21.58 | 34.54 | 15.37 | 6.28  |
| 1557 | 57 | 1 | 1 | 0 | 88.5 | 25.62 | 1.6  | 43 | 0 | 29   | 22.10 | 54.13 | 24.09 | 7.99  |
| 1558 | 56 | 2 | 0 | 0 | 59.5 | 18.30 | 1.57 | 14 | 1 | 21.4 | 9.22  | 33.88 | 14.53 | 6.06  |
| 1559 | 71 | 1 | 0 | 1 | 93.5 | 26.17 | 1.81 | 34 | 0 | 33.2 | 22.96 | 46.19 | 19.31 | 7.31  |
| 1560 | 66 | 2 | 0 | 0 | 88   | 24.22 | 1.43 | 18 | 0 | 36.5 | 20.35 | 35.36 | 14.41 | 6.15  |
| 1561 | 61 | 2 | 0 | 0 | 82   | 25.86 | 1.52 | 22 | 0 | 41.6 | 24.64 | 34.62 | 14.23 | 5.99  |
| 1562 | 56 | 2 | 0 | 0 | 88   | 32.66 | 1.55 | 17 | 1 | 50.5 | 33.83 | 33.13 | 13.45 | 6.29  |
| 1563 | 55 | 1 | 3 | 0 | 103  | 32.57 | 1.52 | 42 | 0 | 34   | 31.99 | 62.23 | 27.48 | 9.44  |
| 1564 | 59 | 2 | 0 | 0 | 83.5 | 21.10 | 1.41 | 27 | 0 | 28.6 | 13.49 | 33.70 | 14.80 | 6.53  |
| 1565 | 77 | 2 | 0 | 0 | 79   | 25.00 | 1.48 | 29 | 0 | 31   | 19.33 | 42.98 | 18.97 | 7.08  |
| 1566 | 53 | 2 | 0 | 0 | 78   | 23.93 | 2.03 | 20 | 0 | 37.2 | 20.86 | 35.28 | 14.48 | 6.03  |
| 1567 | 62 | 2 | 0 | 0 | 79   | 23.77 | 1.18 | 23 | 0 | 34.2 | 17.51 | 33.67 | 14.24 | 6.51  |
| 1568 | 74 | 2 | 0 | 0 | 81   | 23.75 | 1.51 | 19 | 0 | 39   | 23.09 | 36.06 | 14.95 | 6.02  |
| 1569 | 64 | 1 | 1 | 1 | 78   | 20.68 | 1.5  | 28 | 1 | 15.5 | 8.33  | 45.28 | 18.91 | 6.97  |
| 1570 | 63 | 2 | 0 | 0 | 84   | 25.00 | 1.64 | 27 | 0 | 31.7 | 19.52 | 41.99 | 18.84 | 7.55  |
| 1571 | 69 | 2 | 0 | 0 | 81   | 24.62 | 1.53 | 25 | 0 | 41.8 | 25.92 | 36.11 | 13.44 | 5.24  |
| 1572 | 53 | 1 | 1 | 1 | 74   | 21.05 | 1.12 | 45 | 1 | 7.9  | 4.44  | 51.55 | 22.11 | 7.93  |
| 1573 | 75 | 2 | 0 | 0 | 84.5 | 17.31 | 0.9  | 14 | 1 | 30.2 | 11.90 | 27.49 | 10.73 | 4.62  |
| 1574 | 52 | 1 | 0 | 1 | 101  | 35.57 | 1.32 | 40 | 0 | 33.1 | 29.31 | 59.33 | 27.69 | 10.87 |
| 1575 | 70 | 1 | 3 | 0 | 72   | 18.81 | 1.23 | 22 | 1 | 13.6 | 6.97  | 44.18 | 18.96 | 6.74  |
| 1576 | 69 | 2 | 0 | 0 | 97   | 25.50 | 0.98 | 16 | 1 | 34.1 | 17.47 | 33.75 | 15.06 | 7.31  |
| 1577 | 52 | 1 | 1 | 1 | 101  | 31.78 | 1.86 | 45 | 0 | 34.3 | 31.28 | 59.81 | 25.78 | 8.91  |
| 1578 | 51 | 2 | 0 | 1 | 88.5 | 23.17 | 1.49 | 35 | 0 | 37.5 | 21.93 | 36.58 | 15.36 | 5.91  |
| 1579 | 55 | 1 | 0 | 1 | 67.5 | 21.79 | 1.65 | 42 | 0 | 16.3 | 9.17  | 47.21 | 21.07 | 8.07  |
| 1580 | 51 | 1 | 0 | 0 | 77.5 | 21.86 | 2.28 | 35 | 0 | 22.8 | 12.73 | 42.19 | 19.32 | 7.37  |
| 1581 | 73 | 1 | 0 | 1 | 85   | 24.06 | 1.44 | 31 | 0 | 23.5 | 14.06 | 45.83 | 19.85 | 7.58  |
| 1582 | 73 | 2 | 0 | 0 | 82   | 24.56 | 1.24 | 15 | 1 | 33.1 | 17.15 | 34.73 | 15.32 | 6.93  |
| 1583 | 59 | 1 | 3 | 0 | 75   | 21.17 | 1.21 | 34 | 0 | 15.5 | 8.38  | 45.65 | 19.92 | 7.84  |

|      |    |   |   |   |      |       |      |      |   |      |       |       |       |      |
|------|----|---|---|---|------|-------|------|------|---|------|-------|-------|-------|------|
| 1584 | 58 | 2 | 0 | 0 | 80   | 23.65 | 1.59 | 32   | 1 | 34.4 | 22.05 | 41.96 | 18.79 | 6.83 |
| 1585 | 86 | 1 | 0 | 0 | 97   | 25.64 | 0.7  | 19   | 2 | 35.3 | 22.08 | 40.48 | 15.01 | 5.88 |
| 1586 | 54 | 1 | 1 | 1 | 70   | 19.21 | 1.64 | 41   | 0 | 18   | 8.96  | 40.87 | 18.41 | 6.92 |
| 1587 | 63 | 1 | 0 | 1 | 88   | 25.72 | 1.85 | 40   | 0 | 25.9 | 16.22 | 46.35 | 20.87 | 8.13 |
| 1588 | 56 | 2 | 0 | 1 | 72   | 19.77 | 1.36 | 24   | 0 | 28.8 | 13.00 | 32.11 | 13.12 | 5.59 |
| 1589 | 53 | 2 | 0 | 1 | 67   | 21.78 | 1.69 | 30   | 0 | 28.5 | 16.02 | 40.19 | 18.46 | 7.04 |
| 1590 | 76 | 1 | 0 | 0 | 74   | 21.60 | 0.86 | 14   | 1 | 22.2 | 11.40 | 39.99 | 17.54 | 6.97 |
| 1591 | 70 | 2 | 0 | 0 | 78.5 | 27.88 | 0.91 | 15   | 1 | 44.5 | 24.06 | 29.96 | 12.12 | 6    |
| 1592 | 74 | 2 | 0 | 0 | 103  | 29.56 | 0.95 | 9    | 2 | 44.3 | 26.68 | 33.50 | 13.68 | 6.42 |
| 1593 | 58 | 2 | 0 | 0 | 79.5 | 26.14 | 1.39 | 26   | 1 | 48.3 | 32.84 | 35.08 | 15.08 | 5.75 |
| 1594 | 59 | 1 | 1 | 1 | 84   | 22.69 | 1.56 | 38   | 1 | 25   | 15.19 | 45.48 | 18.66 | 6.94 |
| 1595 | 51 | 1 | 1 | 0 | 84.5 | 27.48 | 2.02 | 55   | 0 | 28   | 20.22 | 51.89 | 25.47 | 9.47 |
| 1596 | 52 | 1 | 1 | 1 | 86.5 | 25.61 | 2.02 | 45   | 0 | 22.9 | 14.45 | 48.51 | 21.15 | 8.45 |
| 1597 | 51 | 1 | 0 | 0 | 75   | 34.59 | 1.5  | 38   | 0 | 16.2 | 7.72  | 40.05 | 15.97 | 6.35 |
| 1598 | 68 | 2 | 0 | 0 | 101  | 30.55 | 1.21 | 25   | 1 | 40   | 27.69 | 41.51 | 18.05 | 7.83 |
| 1599 | 60 | 2 | 0 | 0 | 64.5 | 22.31 | 1.27 | 22   | 0 | 33.6 | 15.17 | 29.93 | 12.76 | 6.26 |
| 1600 | 62 | 2 | 0 | 0 | 93   | 31.40 | 1.1  | 19   | 1 | 49.2 | 31.26 | 32.33 | 12.31 | 5.93 |
| 1601 | 73 | 2 | 0 | 0 | 78   | 23.29 | 1.36 | 20   | 1 | 38.4 | 20.61 | 33.08 | 12.03 | 5.09 |
| 1602 | 80 | 1 | 3 | 1 | 96   | 28.47 | 1.37 | 32   | 0 | 29.3 | 20.63 | 49.77 | 20.92 | 8.3  |
| 1603 | 76 | 2 | 0 | 0 | 70   | 17.39 | 1.17 | 15   | 1 | 21.3 | 8.43  | 31.12 | 12.72 | 5.78 |
| 1604 | 68 | 2 | 0 | 0 | 75   | 21.19 | 1.05 | 21   | 1 | 34.7 | 16.04 | 30.11 | 11.92 | 5.46 |
| 1605 | 66 | 2 | 0 | 0 | 90   | 22.64 | 1.12 | 23   | 0 | 36.1 | 19.31 | 34.20 | 14.42 | 6.16 |
| 1606 | 79 | 1 | 3 | 1 | 100  | 29.34 | 1.19 | 31   | 1 | 33.2 | 26.87 | 54.13 | 25.10 | 8.79 |
| 1607 | 52 | 1 | 1 | 0 | 80   | 20.45 | 1.38 | 37   | 0 | 18.7 | 9.75  | 42.50 | 18.31 | 6.61 |
| 1608 | 73 | 1 | 1 | 1 | 91   | 23.10 | 1.56 | 35   | 0 | 22.9 | 15.07 | 50.69 | 21.62 | 7.25 |
| 1609 | 56 | 1 | 1 | 1 | 98   | 28.01 | 1.57 | 42   | 0 | 34.4 | 28.63 | 54.52 | 25.97 | 8.57 |
| 1610 | 68 | 1 | 0 | 0 | 76   | 22.36 | 1.83 | 31   | 1 | 19.4 | 10.81 | 44.86 | 18.90 | 7.3  |
| 1611 | 52 | 2 | 0 | 1 | 68   | 22.28 | 1.83 | 27   | 0 | 37.7 | 21.25 | 35.10 | 15.51 | 6.02 |
| 1612 | 62 | 2 | 0 | 0 | 67   | 18.53 | 1.65 | 19   | 0 | 33.5 | 14.31 | 28.38 | 11.67 | 4.96 |
| 1613 | 62 | 2 | 0 | 0 | 87   | 26.96 | 1.08 | 30   | 1 | 39.7 | 23.22 | 35.25 | 15.46 | 6.98 |
| 1614 | 83 | 1 | 3 | 0 | 93   | 25.28 | 0.8  | 21   | 2 | 33.3 | 21.02 | 42.07 | 18.24 | 7.26 |
| 1615 | 59 | 1 | 3 | 1 | 67.5 | 25.59 | 1.71 | 41   | 0 | 29.5 | 21.48 | 51.34 | 21.88 | 7.47 |
| 1616 | 68 | 1 | 0 | 1 | 96   | 28.88 | 1.16 | 39   | 1 | 29.2 | 23.40 | 56.67 | 25.13 | 8.87 |
| 1617 | 64 | 2 | 0 | 0 | 65   | 19.70 | 2    | 24   | 0 | 25.1 | 12.01 | 35.92 | 14.82 | 6.08 |
| 1618 | 71 | 1 | 0 | 0 | 85   | 24.32 | 1.64 | 27   | 1 | 28.8 | 16.84 | 41.73 | 17.53 | 7.13 |
| 1619 | 72 | 1 | 0 | 1 | 98   | 26.92 | 1.35 | 31   | 0 | 27.6 | 21.46 | 56.26 | 26.77 | 8.88 |
| 1620 | 66 | 2 | 0 | 0 | 78   | 22.93 | 1.43 | 26   | 0 | 31.9 | 17.79 | 38.03 | 16.67 | 6.73 |
| 1621 | 62 | 1 | 1 | 0 | 87   | 21.44 | 1.19 | 37   | 1 |      |       |       |       |      |
| 1622 | 65 | 2 | 0 | 0 | 81   | 24.42 | 1.39 | 15   | 1 | 40.6 | 20.75 | 30.35 | 12.23 | 5.53 |
| 1623 | 53 | 1 | 0 | 0 | 82   | 22.96 | 2.21 | 39   | 0 | 17.3 | 10.75 | 51.32 | 22.80 | 8.16 |
| 1624 | 78 | 2 | 0 | 0 | 47.5 | 19.62 | 1.25 | 7    | 1 | 19.2 | 8.45  | 35.59 | 13.33 | 5.72 |
| 1625 | 85 | 1 | 1 | 1 | 72.5 | 20.46 | 1.42 | 26   | 1 | 16.9 | 7.86  | 38.57 | 15.63 | 6.75 |
| 1626 | 79 | 1 | 1 | 0 | 77   | 21.87 | 1.15 | 40   | 1 | 15   | 8.41  | 47.73 | 20.71 | 7.93 |
| 1627 | 61 | 2 | 0 | 0 | 81   | 23.91 | 1.44 | 23   | 0 | 30.5 | 15.74 | 35.89 | 15.23 | 7.03 |
| 1628 | 72 | 1 | 3 | 0 | 83   | 20.87 | 1.13 | 20   | 2 | 18.2 | 8.95  | 40.09 | 15.36 | 5.75 |
| 1629 | 64 | 2 | 0 | 0 | 74   | 22.85 | 1.64 | 12   | 1 | 28.4 | 13.91 | 35.12 | 14.61 | 6.85 |
| 1630 | 77 | 2 | 1 | 1 | 91   | 24.73 | 0.69 | 15   | 2 | 33.8 | 17.67 | 34.61 | 12.83 | 5.95 |
| 1631 | 70 | 2 | 0 | 0 | 77   | 23.03 | 1.46 | 22   | 0 | 37.2 | 18.94 | 32.04 | 13.32 | 5.84 |
| 1632 | 52 | 1 | 1 | 1 | 93.5 | 26.56 | 1.81 | 38   | 0 | 29.3 | 24.84 | 59.89 | 26.22 | 7.93 |
| 1633 | 63 | 2 | 0 | 0 | 76   | 23.75 | 1.42 | 20   | 0 | 36.1 | 18.35 | 32.46 | 13.32 | 6.13 |
| 1634 | 53 | 2 | 0 | 0 | 67   | 20.71 | 1.78 | 20   | 0 | 30.9 | 13.03 | 29.12 | 11.62 | 5.6  |
| 1635 | 51 | 1 | 0 | 0 | 82   | 24.76 | 1.67 | 29   | 0 | 26.6 | 18.02 | 49.81 | 23.23 | 8.41 |
| 1636 | 59 | 2 | 0 | 1 | 84   | 22.82 | 1.49 | 21   | 0 | 34.2 | 19.38 | 37.32 | 16.25 | 6.55 |
| 1637 | 52 | 2 | 0 | 1 | 74.5 | 21.74 | 1.63 | 28   | 0 | 33.8 | 17.51 | 34.27 | 13.30 | 5.49 |
| 1638 | 69 | 1 | 3 | 0 | 99   | 28.72 | 0.66 | 28   | 1 | 29.6 | 23.50 | 55.82 | 23.25 | 8.76 |
| 1639 | 62 | 2 | 0 | 0 | 86   | 20.31 | 1.31 | 23   | 0 | 33.4 | 18.11 | 36.06 | 14.92 | 5.67 |
| 1640 | 65 | 2 | 0 | 0 | 110  | 34.52 | 0.91 | 24   | 1 | 41.5 | 35.79 | 50.52 | 18.29 | 7.21 |
| 1641 | 69 | 2 | 0 | 0 | 92.5 | 27.78 | 0.91 | 21   | 1 | 44.2 | 31.33 | 39.48 | 15.26 | 5.89 |
| 1642 | 53 | 1 | 0 | 0 | 102  | 32.37 | 1.39 | 38   | 0 | 38.8 | 35.29 | 55.55 | 23.65 | 8.14 |
| 1643 | 52 | 2 | 0 | 0 | 62   | 19.67 | 1.69 | 16   | 1 | 33.9 | 15.27 | 29.73 | 12.81 | 5.43 |
| 1644 | 55 | 2 | 0 | 0 | 69   | 23.73 | 1.19 | 19   | 0 | 36   | 19.13 | 33.95 | 13.64 | 6.01 |
| 1645 | 50 | 2 | 0 | 0 | 77   | 24.87 | 1.64 | 25   | 0 | 38.1 | 21.96 | 35.63 | 11.07 | 4.7  |
| 1646 | 74 | 1 | 3 | 0 | 92   | 25.58 | 1.2  | 34   | 1 | 27.9 | 20.33 | 52.66 | 22.53 | 7.64 |
| 1647 | 63 | 2 | 0 | 0 | 85   | 25.45 | 1.26 | 22   | 0 | 37.7 | 24.95 | 41.25 | 16.70 | 6.32 |
| 1648 | 65 | 2 | 0 | 0 | 86   | 26.97 | 1.48 | 30   | 0 | 40.9 | 26.48 | 38.25 | 16.34 | 6.65 |
| 1649 | 70 | 1 | 0 | 0 | 90   | 26.93 | 2.02 | 26.6 | 1 |      |       |       |       |      |
| 1650 | 69 | 2 | 0 | 0 | 77   | 24.25 | 1.12 | 17   | 1 | 36.7 | 19.25 | 33.27 | 15.05 | 6.96 |
| 1651 | 54 | 2 | 0 | 0 | 73   | 24.46 | 1.51 | 20   | 0 | 42.9 | 22.33 | 29.73 | 12.37 | 5.79 |
| 1652 | 68 | 2 | 0 | 0 | 69.5 | 20.26 | 1.35 | 17   | 1 | 30.4 | 14.20 | 32.59 | 13.54 | 6.09 |
| 1653 | 72 | 1 | 1 | 1 | 90.5 | 25.70 | 1.36 | 31   | 0 | 36.3 | 22.50 | 39.48 | 17.77 | 7.18 |
| 1654 | 71 | 2 | 0 | 0 | 93   | 29.74 | 1.24 | 18   | 0 | 41.9 | 29.26 | 40.59 | 17.11 | 7.3  |
| 1655 | 69 | 2 | 0 | 0 | 87.5 | 30.03 | 1.27 | 17   | 1 | 43.3 | 29.15 | 38.20 | 15.33 | 6.74 |

|      |    |   |   |   |      |       |      |    |   |      |       |       |       |      |
|------|----|---|---|---|------|-------|------|----|---|------|-------|-------|-------|------|
| 1656 | 72 | 2 | 0 | 0 | 93   | 26.92 | 1.29 | 14 | 1 | 39.5 | 22.36 | 34.25 | 13.27 | 6.31 |
| 1657 | 55 | 2 | 0 | 0 | 69   | 20.34 | 1.57 | 16 | 1 | 29.5 | 11.77 | 28.16 | 11.99 | 6.2  |
| 1658 | 51 | 1 | 1 | 1 | 82   | 21.54 | 2.86 | 50 | 0 | 22   | 14.98 | 53.05 | 23.43 | 7.24 |
| 1659 | 52 | 2 | 0 | 0 | 72   | 21.31 | 1.45 | 18 | 0 | 39.7 | 20.62 | 31.32 | 12.33 | 4.96 |
| 1660 | 54 | 2 | 0 | 0 | 79   | 24.10 | 1.45 | 21 | 1 | 37.9 | 22.26 | 36.41 | 15.78 | 6.27 |
| 1661 | 65 | 1 | 3 | 1 | 90   | 25.50 | 1.71 | 30 | 0 | 26.3 | 18.26 | 51.26 | 23.57 | 8.43 |
| 1662 | 62 | 2 | 0 | 0 | 87   | 28.73 | 1.13 | 20 | 0 | 44.9 | 32.43 | 39.76 | 17.32 | 6.81 |
| 1663 | 51 | 2 | 0 | 0 | 83   | 24.48 | 1.4  | 12 | 1 | 36.5 | 21.74 | 37.81 | 16.62 | 6.8  |
| 1664 | 56 | 2 | 0 | 0 | 80   | 19.46 | 1.42 | 21 | 0 | 33.6 | 17.10 | 33.77 | 13.41 | 5.03 |
| 1665 | 74 | 1 | 1 | 1 | 91   | 26.27 | 1.25 | 33 | 0 | 26.4 | 16.82 | 47.00 | 20.29 | 8.02 |
| 1666 | 52 | 2 | 0 | 1 | 75   | 21.42 | 1.57 | 30 | 0 | 40.9 | 21.33 | 30.83 | 13.05 | 5.23 |
| 1667 | 59 | 1 | 1 | 0 | 70.5 | 18.17 | 1.86 | 38 | 0 | 18.7 | 9.42  | 40.94 | 17.83 | 6.3  |
| 1668 | 82 | 1 | 0 | 1 | 85   | 25.64 | 1.22 | 19 | 1 | 25.1 | 15.70 | 46.92 | 20.91 | 8.21 |
| 1669 | 58 | 1 | 0 | 0 | 76   | 23.43 | 1.96 | 36 | 0 | 28   | 16.98 | 43.68 | 18.89 | 7.24 |
| 1670 | 76 | 2 | 0 | 0 | 92   | 27.02 | 1.1  | 20 | 1 | 36.9 | 22.82 | 38.96 | 14.38 | 6.02 |
| 1671 | 60 | 2 | 0 | 0 | 85   | 22.07 | 1.64 | 24 | 0 | 36.9 | 20.99 | 35.87 | 15.57 | 6.01 |
| 1672 | 54 | 1 | 0 | 0 | 70   | 20.31 | 1.57 | 45 | 0 | 12.4 | 6.67  | 47.07 | 21.25 | 7.89 |
| 1673 | 56 | 2 | 0 | 1 | 75   | 23.23 | 1.5  | 26 | 0 | 34.3 | 17.55 | 33.68 | 13.41 | 6.07 |
| 1674 | 81 | 1 | 0 | 0 | 94   | 25.49 | 1.02 | 20 | 2 | 31.7 | 19.58 | 42.17 | 16.11 | 6.58 |
| 1675 | 60 | 2 | 0 | 0 | 84   | 26.59 | 1.74 | 20 | 0 | 42   | 29.38 | 40.52 | 18.35 | 6.88 |
| 1676 | 62 | 1 | 0 | 0 | 93   | 19.82 | 1.21 | 29 | 0 | 20.8 | 11.24 | 42.86 | 19.32 | 6.76 |
| 1677 | 68 | 1 | 0 | 0 | 75   | 19.29 | 1.07 | 29 | 1 | 23.8 | 11.19 | 35.74 | 14.88 | 5.78 |
| 1678 | 74 | 1 | 0 | 0 | 80   | 22.53 | 1.85 | 40 | 0 | 24   | 13.38 | 42.31 | 18.77 | 7.47 |
| 1679 | 64 | 2 | 0 | 0 | 70   | 22.32 | 1.03 | 14 | 1 | 37   | 18.20 | 30.98 | 13.00 | 6.06 |
| 1680 | 60 | 2 | 0 | 0 | 64   | 19.47 | 1.74 | 20 | 0 | 29.1 | 12.90 | 31.37 | 12.90 | 5.6  |
| 1681 | 79 | 1 | 0 | 0 | 79.5 | 22.62 | 1.5  | 32 | 0 | 24.1 | 13.39 | 42.13 | 18.99 | 7.59 |
| 1682 | 68 | 2 | 0 | 0 | 71   | 20.43 | 1.26 | 16 | 1 | 35.6 | 17.34 | 31.37 | 12.71 | 5.24 |
| 1683 | 73 | 1 | 1 | 1 | 78   | 20.32 | 1.69 | 25 | 1 | 19.7 | 10.00 | 40.74 | 17.62 | 6.78 |
| 1684 | 54 | 1 | 3 | 1 | 82   | 24.46 | 2.21 | 51 | 0 | 24.8 | 16.50 | 49.92 | 22.05 | 8.05 |
| 1685 | 52 | 2 | 0 | 0 | 82   | 22.54 | 1.56 | 24 | 0 | 35.4 | 21.03 | 38.33 | 17.29 | 6.39 |
| 1686 | 56 | 2 | 0 | 0 | 67   | 22.96 | 1.83 | 17 | 1 | 41.7 | 22.53 | 31.49 | 13.16 | 5.41 |
| 1687 | 58 | 2 | 0 | 0 | 65   | 20.16 | 1.2  | 20 | 1 | 33.6 | 14.07 | 27.78 | 11.60 | 5.5  |
| 1688 | 66 | 2 | 0 | 0 | 78.5 | 24.27 | 1.08 | 18 | 1 | 39   | 22.26 | 34.75 | 14.81 | 6.16 |
| 1689 | 79 | 2 | 0 | 0 | 74   | 20.09 | 1.46 | 19 | 0 | 25.5 | 10.15 | 29.63 | 11.31 | 5.37 |
| 1690 | 61 | 1 | 3 | 1 | 92   | 27.39 | 1.78 | 40 | 0 | 35.6 | 27.71 | 50.23 | 22.48 | 7.84 |
| 1691 | 50 | 2 | 0 | 0 | 70   | 22.29 | 1.73 | 20 | 0 | 37.8 | 17.59 | 28.96 | 12.19 | 5.62 |
| 1692 | 61 | 2 | 0 | 0 | 81   | 22.58 | 1.65 | 21 | 0 | 36.2 | 19.17 | 33.79 | 12.48 | 5.3  |
| 1693 | 71 | 1 | 3 | 1 | 89   | 26.09 | 1.59 | 29 | 1 | 18.4 | 11.18 | 49.47 | 19.28 | 8.14 |
| 1694 | 59 | 1 | 1 | 1 | 106  | 29.54 | 1.11 | 31 | 1 | 31.7 | 24.38 | 52.47 | 19.70 | 7.45 |
| 1695 | 62 | 1 | 0 | 0 | 75   | 22.03 | 1.57 | 37 | 0 | 19.1 | 10.86 | 46.06 | 20.24 | 7.61 |
| 1696 | 56 | 2 | 0 | 1 | 87   | 27.62 | 1.61 | 28 | 0 | 40.1 | 29.06 | 43.49 | 20.07 | 7.57 |
| 1697 | 58 | 1 | 1 | 0 | 91   | 24.34 | 1.64 | 33 | 1 | 33.4 | 24.74 | 49.34 | 20.96 | 6.48 |
| 1698 | 70 | 2 | 0 | 0 | 93   | 22.26 | 1.33 | 15 | 1 | 34   | 17.67 | 34.24 | 13.82 | 5.95 |
| 1699 | 74 | 1 | 0 | 1 | 90   | 24.89 | 1.82 | 26 | 1 | 28.9 | 20.22 | 49.69 | 21.75 | 7.56 |
| 1700 | 63 | 2 | 0 | 0 | 81   | 26.47 | 1.3  | 20 | 0 | 43.1 | 24.16 | 31.92 | 13.49 | 6.24 |
| 1701 | 69 | 2 | 0 | 0 | 104  | 30.49 | 1.13 | 16 | 1 | 45.4 | 37.16 | 44.72 | 18.51 | 6.77 |
| 1702 | 72 | 2 | 0 | 0 | 72.5 | 22.88 | 1.76 | 37 | 1 | 43   | 23.86 | 31.58 | 12.90 | 5.14 |
| 1703 | 82 | 2 | 0 | 0 | 83   | 21.70 | 0.28 | 11 | 2 | 23.8 | 10.62 | 33.96 | 12.41 | 5.77 |
| 1704 | 84 | 1 | 0 | 0 | 73   | 19.70 | 0.85 | 28 | 2 | 17.3 | 8.45  | 40.32 | 16.58 | 6.67 |
| 1705 | 60 | 1 | 1 | 1 | 74   | 21.03 | 1.33 | 19 | 1 | 20.7 | 8.92  | 34.25 | 14.74 | 6.81 |
| 1706 | 64 | 1 | 0 | 0 | 81   | 22.06 | 1.55 | 33 | 0 | 20.5 | 11.48 | 44.51 | 18.11 | 6.93 |
| 1707 | 85 | 1 | 3 | 0 | 93   | 24.12 | 1.02 | 26 | 1 | 31.5 | 18.42 | 40.13 | 16.12 | 6.38 |
| 1708 | 73 | 2 | 0 | 0 | 73   | 21.59 | 1.42 | 12 | 1 | 32.7 | 13.51 | 27.85 | 11.24 | 5.88 |
| 1709 | 69 | 2 | 3 | 1 | 68   | 19.26 | 1.59 | 22 | 1 | 34.1 | 15.33 | 29.57 | 11.94 | 5.02 |
| 1710 | 58 | 1 | 0 | 0 | 93   | 25.15 | 2.09 | 38 | 0 | 34.1 | 24.40 | 47.20 | 20.56 | 7.02 |
| 1711 | 51 | 2 | 0 | 0 | 85   | 28.75 | 2.11 | 24 | 1 | 40.1 | 29.15 | 43.51 | 17.55 | 6.96 |
| 1712 | 79 | 1 | 3 | 0 | 82   | 22.14 | 1.29 | 21 | 1 | 26.5 | 15.89 | 44.14 | 18.44 | 6.54 |
| 1713 | 76 | 1 | 1 | 1 | 91   | 24.05 | 1.21 | 26 | 1 | 30.8 | 19.84 | 44.60 | 18.79 | 6.87 |
| 1714 | 74 | 2 | 0 | 0 | 84   | 25.15 | 1.33 | 17 | 1 | 38.3 | 21.85 | 35.25 | 13.90 | 6.02 |
| 1715 | 70 | 2 | 0 | 0 | 102  | 29.76 | 1.75 | 21 | 0 | 45.6 | 32.84 | 39.18 | 14.60 | 5.99 |
| 1716 | 74 | 2 | 0 | 0 | 78.5 | 22.10 | 1.4  | 15 | 1 |      |       |       |       |      |
| 1717 | 64 | 2 | 0 | 0 | 83   | 22.04 | 0.86 | 14 | 2 | 33.3 | 17.24 | 34.49 | 13.89 | 5.82 |
| 1718 | 52 | 2 | 0 | 0 | 80   | 24.28 | 1.76 | 27 | 0 | 38.9 | 21.43 | 33.64 | 13.98 | 5.96 |
| 1719 | 56 | 2 | 0 | 0 | 76.5 | 24.95 | 1.59 | 26 | 0 | 37.6 | 21.57 | 35.78 | 13.97 | 6    |
| 1720 | 60 | 1 | 3 | 1 | 111  | 32.61 | 1.47 | 35 | 0 | 38.4 | 33.41 | 53.67 | 20.74 | 7.59 |
| 1721 | 59 | 1 | 1 | 0 | 78   | 21.56 | 1.22 | 34 | 0 | 7.2  | 3.46  | 44.61 | 18.36 | 7.79 |
| 1722 | 78 | 1 | 3 | 1 | 92   | 24.32 | 1.04 | 30 | 1 | 23.1 | 17.39 | 57.93 | 22.93 | 7.55 |
| 1723 | 80 | 2 | 0 | 0 | 102  | 26.87 | 1.12 | 23 | 1 | 34.2 | 18.64 | 35.83 | 14.41 | 6.82 |
| 1724 | 73 | 2 | 0 | 0 | 75   | 21.38 | 1.18 | 20 | 0 | 31.4 | 15.27 | 33.38 | 12.82 | 5.36 |
| 1725 | 60 | 2 | 0 | 0 | 88   | 28.73 | 1.48 | 23 | 0 | 38.6 | 25.49 | 40.59 | 16.88 | 7.32 |
| 1726 | 70 | 2 | 0 | 0 | 93   | 28.57 | 1.36 | 28 | 0 | 43.2 | 27.70 | 36.49 | 16.23 | 6.94 |
| 1727 | 66 | 1 | 0 | 0 | 93.5 | 26.81 | 1.53 | 46 | 0 | 28.4 | 23.27 | 58.75 | 27.89 | 8.94 |



|      |    |   |   |   |      |       |      |      |   |      |       |       |       |      |
|------|----|---|---|---|------|-------|------|------|---|------|-------|-------|-------|------|
| 1728 | 61 | 2 | 0 | 0 | 86   | 25.20 | 1.02 | 18   | 1 | 36   | 19.75 | 35.10 | 14.38 | 6.46 |
| 1729 | 67 | 2 | 1 | 1 | 90   | 26.36 | 1.38 | 20   | 0 | 32.5 | 17.57 | 36.51 | 15.90 | 7.5  |
| 1730 | 75 | 2 | 0 | 0 | 89   | 25.62 | 1.2  | 24   | 0 | 40.4 | 23.16 | 34.12 | 14.86 | 6.51 |
| 1731 | 68 | 1 | 0 | 0 | 94   | 25.73 | 1.73 | 35   | 1 | 32.5 | 24.46 | 50.77 | 22.11 | 7.31 |
| 1732 | 75 | 2 | 0 | 0 | 110  | 30.91 | 1.21 | 20   | 1 | 44.4 | 31.92 | 39.93 | 14.81 | 6.22 |
| 1733 | 83 | 1 | 1 | 0 | 98   | 25.12 | 1.03 | 17   | 1 | 35.8 | 25.15 | 45.17 | 19.16 | 6.73 |
| 1734 | 53 | 2 | 0 | 0 | 93   | 31.96 | 1.73 | 19   | 0 | 42.6 | 28.87 | 38.95 | 16.45 | 7.52 |
| 1735 | 58 | 2 | 0 | 0 | 76   | 23.91 | 1.42 | 25   | 1 | 39   | 22.04 | 34.55 | 14.93 | 6.26 |
| 1736 | 61 | 1 | 1 | 0 | 96   | 25.19 | 1.55 | 41   | 0 | 26.3 | 18.22 | 50.96 | 22.24 | 7.88 |
| 1737 | 68 | 2 | 0 | 1 | 94   | 25.68 | 1.33 | 26   | 0 | 33.7 | 20.65 | 40.63 | 17.43 | 7.21 |
| 1738 | 69 | 1 | 0 | 0 | 79.5 | 21.70 | 2.02 | 36   | 1 | 18   | 10.92 | 49.64 | 19.28 | 6.61 |
| 1739 | 70 | 2 | 0 | 0 | 75   | 24.22 | 1.7  | 20   | 0 | 32.6 | 17.65 | 36.50 | 15.51 | 6.83 |
| 1740 | 71 | 1 | 3 | 1 | 69   | 18.95 | 1.23 | 35   | 0 | 14.8 | 7.49  | 43.29 | 19.26 | 6.87 |
| 1741 | 70 | 1 | 1 | 1 | 87   | 22.27 | 1.02 | 17   | 1 | 17.4 | 9.52  | 45.13 | 17.98 | 7.02 |
| 1742 | 64 | 2 | 0 | 1 | 81   | 21.91 | 0.91 | 20   | 1 | 21.6 | 11.01 | 39.92 | 16.18 | 6.83 |
| 1743 | 72 | 1 | 1 | 0 | 88.5 | 22.68 | 1.17 | 29   | 1 | 28.2 | 16.28 | 41.43 | 17.75 | 6.57 |
| 1744 | 65 | 2 | 1 | 0 | 90   | 26.22 | 0.99 | 21   | 1 | 35.9 | 18.94 | 33.81 | 13.59 | 6.64 |
| 1745 | 65 | 2 | 0 | 0 | 92   | 30.72 | 1.28 | 24   | 0 | 38.7 | 25.61 | 40.64 | 15.90 | 6.79 |
| 1746 | 57 | 2 | 0 | 0 | 86   | 25.51 | 1.43 | 26   | 0 | 37.8 | 24.11 | 39.70 | 17.41 | 6.8  |
| 1747 | 62 | 1 | 0 | 0 | 94   | 29.31 | 2.26 | 39.5 | 1 | 28.3 | 23.58 | 59.66 | 25.20 | 8.69 |
| 1748 | 68 | 2 | 0 | 0 | 83   | 24.62 | 1.37 | 21   | 1 | 36.6 | 21.13 | 36.58 | 15.05 | 6.31 |
| 1749 | 68 | 2 | 0 | 0 | 83   | 27.67 | 1.64 | 22   | 0 | 38.9 | 25.13 | 39.51 | 16.34 | 6.88 |
| 1750 | 74 | 2 | 0 | 0 | 89   | 23.74 | 0.84 | 11   | 2 | 42   | 22.41 | 30.94 | 12.69 | 5.48 |
| 1751 | 82 | 1 | 0 | 0 | 100  | 29.48 | 1.17 | 23   | 2 | 31.9 | 23.04 | 49.25 | 18.52 | 7.14 |
| 1752 | 60 | 2 | 0 | 0 | 86   | 21.91 | 1.57 | 22   | 0 | 35.2 | 18.19 | 33.49 | 13.79 | 5.62 |
| 1753 | 82 | 2 | 0 | 0 | 90   | 25.80 | 1.05 | 16   | 2 | 36   | 21.19 | 37.63 | 15.94 | 6.9  |
| 1754 | 78 | 2 | 0 | 1 | 100  | 23.06 | 0.92 | 4    | 1 | 28.5 | 17.07 | 42.76 | 18.80 | 7.19 |
| 1755 | 56 | 2 | 0 | 0 | 68   | 22.00 | 1.39 | 27   | 0 | 37.6 | 19.30 | 31.98 | 14.14 | 5.83 |
| 1756 | 51 | 2 | 0 | 0 | 82   | 22.92 | 1.56 | 26   | 1 | 38.4 | 21.55 | 34.50 | 14.10 | 5.7  |
| 1757 | 54 | 2 | 0 | 1 | 76   | 18.83 | 0.96 | 17   | 2 | 39.1 | 16.89 | 26.27 | 8.86  | 3.74 |
| 1758 | 67 | 1 | 0 | 1 | 94   | 26.55 | 1.15 | 18   | 2 | 32.1 | 22.44 | 47.47 | 22.00 | 8.18 |
| 1759 | 56 | 1 | 1 | 1 | 80   | 21.89 | 1.67 | 42   | 1 | 21.6 | 13.40 | 48.54 | 21.43 | 7.33 |
| 1760 | 58 | 2 | 0 | 0 | 78   | 24.58 | 1.88 | 22   | 0 | 38.9 | 22.05 | 34.57 | 13.86 | 6    |
| 1761 | 55 | 1 | 1 | 1 | 83   | 24.55 | 1.96 | 42   | 0 | 25   | 15.45 | 46.46 | 20.02 | 7.61 |
| 1762 | 62 | 2 | 0 | 0 | 85   | 24.30 | 1.82 | 22   | 0 | 30.3 | 16.48 | 37.84 | 14.88 | 6.66 |
| 1763 | 67 | 2 | 0 | 0 | 85   | 24.93 | 1.6  | 20   | 0 | 43.4 | 27.55 | 35.93 | 15.85 | 5.99 |
| 1764 | 55 | 1 | 0 | 1 | 89.5 | 29.43 | 1.42 | 30   | 1 | 35.3 | 23.24 | 42.67 | 18.68 | 8.19 |
| 1765 | 66 | 1 | 3 | 1 | 88   | 24.68 | 1.55 | 41   | 0 | 28   | 18.64 | 47.91 | 20.78 | 7.54 |
| 1766 | 78 | 1 | 0 | 1 | 88   | 22.54 | 1.47 | 28   | 1 | 27   | 15.66 | 42.35 | 18.22 | 6.96 |
| 1767 | 74 | 2 | 0 | 0 | 77   | 23.29 | 1.63 | 21   | 1 | 33.8 | 18.78 | 36.74 | 14.69 | 5.96 |
| 1768 | 75 | 1 | 0 | 0 | 83   | 26.47 | 1.67 | 31   | 0 | 29.2 | 16.52 | 40.11 | 17.08 | 6.85 |
| 1769 | 57 | 1 | 1 | 0 | 77   | 23.75 | 1.35 | 28   | 1 | 24.4 | 13.59 | 42.15 | 18.09 | 7.51 |
| 1770 | 73 | 1 | 0 | 0 | 82   | 21.86 | 1.74 | 36   | 0 | 23.4 | 13.41 | 43.97 | 19.81 | 7.05 |
| 1771 | 55 | 1 | 1 | 0 | 96   | 25.96 | 1.85 | 47.5 | 1 | 32.9 | 21.75 | 44.33 | 18.72 | 6.89 |
| 1772 | 75 | 1 | 0 | 0 | 79.5 | 20.06 | 1.31 | 28   | 1 | 25.8 | 12.10 | 34.84 | 13.87 | 5.89 |
| 1773 | 72 | 1 | 0 | 1 | 90   | 25.83 | 1.11 | 21   | 2 | 38.2 | 23.56 | 38.12 | 16.35 | 6.61 |
| 1774 | 65 | 2 | 0 | 0 | 81   | 24.65 | 1.3  | 16   | 2 | 41.6 | 22.02 | 30.93 | 11.79 | 5.38 |
| 1775 | 74 | 2 | 0 | 0 | 85   | 24.96 | 0.93 | 21   | 1 | 39.1 | 24.30 | 37.81 | 16.80 | 6.56 |
| 1776 | 61 | 1 | 3 | 1 | 83   | 23.66 | 1.5  | 30   | 1 | 21   | 12.28 | 46.34 | 20.17 | 8.05 |
| 1777 | 55 | 2 | 0 | 0 | 85   | 26.47 | 1.61 | 23   | 0 | 42.2 | 27.90 | 38.22 | 15.95 | 6.25 |
| 1778 | 59 | 1 | 1 | 1 | 91.5 | 23.99 | 1.3  | 41   | 1 | 29.1 | 18.86 | 45.90 | 19.93 | 7.05 |
| 1779 | 67 | 2 | 0 | 0 | 95   | 31.70 | 1.14 | 30   | 0 | 42.2 | 30.87 | 42.24 | 17.84 | 7.59 |
| 1780 | 81 | 2 | 0 | 0 | 97   | 27.62 | 0.52 | 11   | 2 | 44.4 | 27.10 | 33.88 | 12.93 | 5.9  |
| 1781 | 78 | 1 | 1 | 0 | 80   | 18.90 | 1.44 | 34   | 1 | 7.4  | 3.88  | 48.83 | 19.05 | 6.61 |
| 1782 | 52 | 2 | 0 | 0 | 83   | 26.02 | 0.07 | 12   | 2 | 42.8 | 23.86 | 31.92 | 12.44 | 6.02 |
| 1783 | 64 | 1 | 3 | 0 | 88   | 26.48 | 1.01 | 31   | 1 | 27.5 | 19.01 | 50.22 | 22.28 | 8.11 |
| 1784 | 50 | 2 | 0 | 0 | 61.5 | 19.35 | 1.74 | 23   | 1 | 30.2 | 14.83 | 34.29 | 14.84 | 5.64 |
| 1785 | 52 | 2 | 0 | 1 | 69   | 24.28 | 1.36 | 20   | 0 | 40.9 | 22.01 | 31.77 | 12.84 | 5.84 |
| 1786 | 54 | 2 | 0 | 1 | 70   | 19.76 | 1.09 | 22   | 1 | 31.6 | 15.81 | 34.22 | 13.38 | 5.17 |
| 1787 | 53 | 2 | 0 | 1 | 75   | 22.92 | 1.4  | 22   | 1 | 35.6 | 17.87 | 32.31 | 12.56 | 5.49 |
| 1788 | 61 | 2 | 0 | 0 | 97.5 | 29.71 | 1.17 | 15   | 1 | 42.2 | 29.56 | 40.42 | 16.45 | 6.62 |
| 1789 | 52 | 2 | 0 | 0 | 83   | 27.21 | 1.43 | 32   | 0 | 47.5 | 31.12 | 34.43 | 14.51 | 5.58 |
| 1790 | 59 | 2 | 0 | 0 | 79   | 25.71 | 1.5  | 17   | 1 | 41.6 | 26.76 | 37.54 | 16.87 | 6.67 |
| 1791 | 53 | 1 | 1 | 1 | 82   | 26.91 | 1.36 | 43   | 1 | 27.8 | 18.45 | 47.94 | 20.74 | 8.1  |
| 1792 | 60 | 2 | 0 | 0 | 74   | 22.33 | 1.49 | 25   | 1 | 39   | 21.38 | 33.47 | 13.70 | 5.38 |
| 1793 | 50 | 2 | 0 | 0 | 70   | 20.33 | 1.67 | 22   | 0 | 28.4 | 13.11 | 33.11 | 13.99 | 5.98 |
| 1794 | 59 | 2 | 0 | 1 | 96   | 32.13 | 1.22 | 23   | 0 | 48.1 | 36.67 | 39.56 | 15.01 | 6.11 |
| 1795 | 63 | 1 | 3 | 1 | 95   | 26.45 | 1.49 | 39   | 1 | 24.3 | 17.66 | 55.11 | 24.02 | 8.47 |
| 1796 | 55 | 1 | 1 | 1 | 82   | 25.89 | 1.4  | 42   | 1 | 23.5 | 17.47 | 56.91 | 26.04 | 8.91 |
| 1797 | 60 | 2 | 0 | 0 | 66   | 20.72 | 1.47 | 20   | 1 | 29.7 | 13.01 | 30.84 | 12.11 | 5.63 |
| 1798 | 50 | 2 | 0 | 0 | 71   | 23.10 | 1.46 | 29   | 1 | 38.3 | 21.66 | 34.86 | 15.20 | 5.98 |
| 1799 | 70 | 1 | 1 | 0 | 74   | 21.84 | 1.33 | 32   | 1 | 13   | 6.86  | 46.09 | 19.48 | 7.67 |

|      |    |   |   |   |      |       |      |      |   |      |       |       |       |      |
|------|----|---|---|---|------|-------|------|------|---|------|-------|-------|-------|------|
| 1800 | 56 | 2 | 0 | 0 | 81   | 23.14 | 1.37 | 24.5 | 0 | 37.6 | 22.84 | 37.86 | 15.25 | 5.78 |
| 1801 | 51 | 1 | 3 | 0 | 97   | 26.88 | 1.6  | 38   | 0 | 25   | 23.05 | 69.17 | 31.94 | 8.96 |
| 1802 | 53 | 2 | 0 | 0 | 93   | 29.69 | 1.36 | 17   | 1 | 49.7 | 37.05 | 37.43 | 16.82 | 6.55 |
| 1803 | 59 | 2 | 3 | 0 | 96   | 26.99 | 1.43 | 28   | 1 | 40.2 | 27.96 | 41.57 | 16.07 | 6.28 |
| 1804 | 51 | 2 | 3 | 1 | 83   | 26.12 | 1.57 | 25   | 0 | 42.4 | 29.17 | 39.58 | 17.20 | 6.42 |
| 1805 | 56 | 2 | 0 | 1 | 92   | 37.05 | 0.32 | 22   | 1 | 58.7 | 45.31 | 31.87 | 11.50 | 5.22 |
| 1806 | 53 | 2 | 0 | 0 | 76   | 24.86 | 1.85 | 30   | 1 | 35.3 | 21.45 | 39.31 | 17.42 | 6.83 |
| 1807 | 52 | 1 | 0 | 0 | 96   | 26.60 | 1.78 | 45   | 1 | 28.8 | 23.31 | 57.60 | 26.73 | 8.47 |
| 1808 | 50 | 2 | 0 | 0 | 75   | 23.93 | 1.83 | 24   | 1 | 40.6 | 22.92 | 33.51 | 14.41 | 5.88 |
| 1809 | 60 | 1 | 3 | 1 | 91   | 21.99 | 1.97 | 39   | 0 | 27   | 20.75 | 56.22 | 25.28 | 8.15 |
| 1810 | 56 | 2 | 0 | 0 | 64.5 | 20.82 | 1.46 | 20   | 0 | 36.2 | 16.54 | 29.16 | 11.50 | 5.14 |
| 1811 | 53 | 2 | 0 | 0 | 99   | 29.50 | 1.6  | 18   | 0 | 38.8 | 28.60 | 45.10 | 18.11 | 7.06 |
| 1812 | 57 | 2 | 0 | 0 | 77   | 22.23 | 1.37 | 25   | 0 | 36.2 | 18.88 | 33.20 | 13.14 | 5.51 |
| 1813 | 63 | 2 | 0 | 0 | 75   | 21.92 | 1.88 | 22   | 0 | 32.6 | 19.02 | 39.38 | 16.92 | 6.22 |
| 1814 | 75 | 2 | 0 | 0 | 84   | 25.84 | 1.22 | 20   | 0 | 40.4 | 24.32 | 35.89 | 15.25 | 6.51 |
| 1815 | 53 | 1 | 1 | 0 | 74   | 22.39 | 2.35 | 39   | 1 | 17.4 | 10.10 | 48.04 | 21.51 | 8.17 |
| 1816 | 52 | 2 | 0 | 0 | 65.5 | 20.32 | 1.79 | 21   | 0 | 34.1 | 17.20 | 33.17 | 14.05 | 5.54 |
| 1817 | 50 | 1 | 0 | 0 | 81   | 24.48 | 1.9  | 41   | 0 | 20.1 | 13.25 | 52.75 | 24.10 | 8.94 |
| 1818 | 50 | 2 | 0 | 0 | 87   | 29.15 | 1.81 | 37   | 0 | 40.4 | 29.42 | 43.42 | 18.93 | 8.3  |
| 1819 | 66 | 2 | 0 | 0 | 79   | 24.21 | 1.44 | 18   | 0 | 36   | 19.90 | 35.37 | 13.07 | 5.73 |
| 1820 | 66 | 2 | 0 | 0 | 76   | 23.94 | 1.61 | 24   | 0 | 36.8 | 20.51 | 35.21 | 13.88 | 5.83 |
| 1821 | 52 | 1 | 0 | 1 | 80   | 21.93 | 2.06 | 41   | 0 | 15.7 | 10.31 | 55.27 | 24.43 | 7.96 |
| 1822 | 58 | 1 | 0 | 1 | 80   | 20.42 | 2.27 | 39   | 0 | 20.3 | 12.34 | 48.30 | 21.34 | 6.98 |
| 1823 | 52 | 1 | 0 | 1 | 81   | 23.41 | 1.76 | 48   | 0 | 23.2 | 14.82 | 49.13 | 22.28 | 7.99 |
| 1824 | 51 | 1 | 0 | 1 | 98   | 32.24 | 1.46 | 49   | 1 | 38.2 | 35.19 | 57.03 | 24.07 | 7.96 |
| 1825 | 57 | 1 | 0 | 1 | 86   | 25.90 | 1.7  | 37   | 1 | 30   | 21.12 | 49.26 | 21.81 | 7.66 |
| 1826 | 81 | 1 | 3 | 0 | 100  | 27.20 | 1.32 | 26   | 2 | 37.6 | 30.48 | 50.53 | 22.36 | 7.3  |
| 1827 | 83 | 2 | 0 | 0 | 106  | 33.80 | 0.46 | 12   | 2 | 53.9 | 41.12 | 35.23 | 15.01 | 6.5  |
| 1828 | 55 | 2 | 0 | 0 | 65   | 21.48 | 1.55 | 23.5 | 0 | 36.1 | 21.10 | 37.38 | 16.37 | 6.04 |
| 1829 | 60 | 2 | 0 | 0 | 65   | 18.26 | 1.26 | 20   | 1 | 30.6 | 13.81 | 31.39 | 11.78 | 4.78 |
| 1830 | 63 | 1 | 3 | 1 | 94   | 26.34 | 1.44 | 43   | 1 | 28.8 | 21.12 | 52.20 | 23.97 | 8.36 |
| 1831 | 54 | 2 | 0 | 0 | 69   | 20.84 | 1.49 | 25   | 1 | 38.8 | 22.17 | 34.90 | 15.78 | 5.65 |
| 1832 | 59 | 2 | 0 | 0 | 79   | 26.42 | 1.29 | 30   | 0 | 44.8 | 27.09 | 33.40 | 14.69 | 6.25 |
| 1833 | 74 | 1 | 0 | 0 | 89   | 23.96 | 1.55 | 38   | 0 | 26.4 | 18.43 | 51.37 | 23.54 | 7.97 |
| 1834 | 70 | 2 | 0 | 0 | 68   | 18.21 | 1.54 | 20   | 0 | 26.4 | 12.72 | 35.52 | 14.04 | 5.24 |
| 1835 | 60 | 1 | 1 | 0 | 95   | 27.74 | 1.24 | 31   | 1 | 34.1 | 27.14 | 52.50 | 20.69 | 6.87 |
| 1836 | 62 | 2 | 0 | 0 | 67   | 17.95 | 1.16 | 9    | 1 | 30.1 | 12.75 | 29.66 | 11.35 | 4.76 |
| 1837 | 54 | 1 | 1 | 1 | 84   | 26.55 | 1.17 | 35   | 1 | 26   | 20.05 | 57.09 | 25.74 | 8.75 |
| 1838 | 59 | 1 | 0 | 0 | 95   | 27.55 | 1.81 | 36   | 1 | 31.5 | 25.09 | 54.60 | 23.84 | 8.06 |
| 1839 | 59 | 2 | 0 | 0 | 76   | 21.89 | 1.44 | 25   | 1 | 36   | 21.13 | 37.58 | 14.95 | 5.49 |

| 3MDspin | BMDhip | SMAF  | MMSE | CESD | MNA  | CCI | TLC    | ALB | TC  | A1c  | hsCRP  | VitD3 | iPTH  |
|---------|--------|-------|------|------|------|-----|--------|-----|-----|------|--------|-------|-------|
| 1.01    | 0.79   | 0     | 29   | 2    | 28.5 | 2   | 1742.5 | 4.4 | 158 | 8.9  | 0.385  | 16.2  | 56    |
| 0.94    | 0.83   | 0     | 29   | 10   | 24   | 0   | 1422.4 | 4.6 | 175 | 5.8  | 0.055  | 11.7  | 28.6  |
| 0.88    | 0.54   | 0     | 20   | 8    | 27   | 0   | 2008.5 | 4.4 | 173 | 6.4  | 0.901  | 27.2  | 48    |
| 1.31    | 1.08   | 0     | 24   | 4    | 25.5 | 3   | 1866.5 | 3.4 | 239 | 6.3  | 0.06   | 17.9  | 25.4  |
| 0.82    | 0.84   | 0     | 26   | 5    | 23   | 0   | 2290.6 | 4.5 | 233 | 6.2  | 0.289  | 18.8  | 50    |
| 1.04    | 1.01   | 0     | 27   | 1    | 28   | 0   | 1888.5 | 4.7 | 244 | 5.7  | <0.012 | 25.7  | 23.1  |
| 1.08    | 0.52   | 0     | 29   | 16   | 19   | 3   | 1178   | 4.4 | 176 | 6.2  | 0.406  | 24.2  | 43.9  |
| 0.96    | 0.76   | 0     | 24   | 1    | 29   | 0   | 1021.2 | 4.7 | 242 | 5.3  | <0.012 | 22.5  | 30.2  |
| 1.27    | 0.98   | 0     | 28   | 1    | 27.5 | 2   | 2252.9 | 4.1 | 307 | 5.6  | 0.264  | 21.3  | 36.2  |
|         | 0.78   | 0     | 23   | 2    | 26.5 | 3   | 1430.6 | 4.7 | 181 | 5.1  | 0.05   | 24.2  | 19.5  |
| 1.18    | 0.97   | 0     | 27   | 8    | 29   | 0   | 1787.7 | 4.6 | 218 | 5.8  | 0.192  | 27.5  | 28.5  |
| 1.09    | 0.94   | 0     | 19   | 7    | 28   | 0   | 1080   | 4.5 | 215 | 5.2  | <0.012 | 18.9  | 34.6  |
| 0.79    | 0.70   | 0     | 28   | 0    | 27.5 | 0   | 2256.5 | 4.3 | 243 | 5.7  | 0.064  | 23.7  | 35.9  |
| 1.26    | 0.99   | 0     | 29   | 0    | 28   | 0   | 1938.4 | 4.5 | 175 | 5.4  | 0.132  | 20.5  | 53.6  |
| 1.21    | 0.85   | 0     | 27   | 0    | 28   | 2   | 2566.6 | 4.4 | 175 | 6    | 0.033  | 33.1  | 37.8  |
| 1.00    | 0.84   | 0     | 24   | 0    | 24   | 0   | 1561.3 | 4.6 | 235 | 5.6  | 0.037  | 20.9  | 30.4  |
| 1.30    | 0.80   | 0     | 21   | 4    | 28.5 | 4   | 1080.6 | 4.1 | 179 | 6    | 0.331  | 26.9  | 54.5  |
| 0.98    | 0.76   | 0     | 22   | 10   | 26.5 | 0   | 2077.3 | 4.8 | 210 | 5.6  | <0.012 | 21.6  | 30.5  |
| 1.00    | 0.67   | 0     | 25   | 11   | 25   | 3   | 1849.1 | 4.2 | 142 | 9.1  | 0.195  | 31.6  | 35.4  |
| 1.09    | 0.79   | 0     | 25   | 8    | 27.5 | 2   | 1401.4 | 4.3 | 161 | 6    | <0.012 | 28.7  | 99.7  |
| 0.99    | 0.82   | 0     | 18   | 16   | 26   | 2   | 970.08 | 4.3 | 187 | 5.3  | 0.015  | 36.1  | 47.8  |
| 0.70    | 0.63   | 0     | 16   | 5    | 27.5 | 4   | 2800   | 4.4 | 131 | 8.3  | 0.874  | 15.9  | 61.3  |
| 0.82    | 0.61   | -2    | 24   | 33   | 21.5 | 1   | 1826.8 | 4.2 | 193 | 5.7  | 0.093  | 18.8  | 60.2  |
| 1.00    | 0.81   | 0     | 29   | 1    | 28.5 | 0   | 2088   | 4.1 | 135 | 5.3  | 0.094  | 38.3  | 21.6  |
| 1.12    | 0.67   | 0     | 20   | 20   | 24.5 | 3   | 2020.3 | 4.3 | 182 | 8.4  | 0.481  | 31    | 12.1  |
| 0.79    | 0.53   | -14   | 5    | 16   | 24   | 6   | 1200   | 4.2 | 149 | 6.6  | 0.044  | 10.3  | 51.1  |
| 1.04    | 0.57   | -4    | 24   | 2    | 23.5 | 3   | 1020.8 | 4.4 | 155 | 5.5  | <0.012 | 23.1  | 64.2  |
| 0.89    | 0.71   | -1    | 21   | 11   | 25   | 2   | 1290.6 | 4.5 | 201 | 6.4  | 0.478  | 13.2  | 83.7  |
| 0.82    | 0.65   | 0     | 28   | 12   | 26   | 4   | 2392.8 | 4.4 | 196 | 7.8  | 0.221  | 22.5  | 47.4  |
| 1.45    | 0.84   | -35.5 | 13   | 27   | 23   | 4   | 1370   | 4.2 | 148 | 6.9  | 0.492  | 20.8  | 55.3  |
| 0.84    | 0.79   | 0     | 27   | 11   | 25   | 0   | 1622.1 | 4.1 | 148 | 6.7  | 0.407  | 18.1  | 75    |
| 0.79    | 0.69   | 0     | 25   | 10   | 27.5 | 2   | 2060.5 | 4.4 | 267 | 6.9  | 0.086  | 24.9  | 34    |
| 1.36    | 0.98   | 0     | 30   | 0    | 27   | 0   | 1621.8 | 4.5 | 186 | 5.2  | <0.012 | 26.6  | 32.9  |
| 0.79    | 0.63   | -3    | 21   | 5    | 27.5 | 0   | 1708.3 | 4.4 | 165 | 5.3  | 0.123  | 18.8  | 115.4 |
| 1.08    | 0.79   | 0     | 29   | 1    | 29.5 | 0   | 1449.2 | 4.5 | 187 | 5.4  | 0.017  | 30.6  | 27.4  |
| 0.87    | 0.57   | -9    | 16   | 27   | 22   | 3   | 1771.2 | 4.2 | 116 | 6.3  | 0.055  | 32.5  | 31.8  |
| 0.85    | 0.73   | 0     | 26   | 0    | 24.5 | 2   | 1681.7 | 4.2 | 209 | 12.8 | 0.056  | 19    | 44.8  |
| 1.11    | 1.05   | 0     | 28   | 3    | 28   | 2   | 2369   | 4.3 | 215 | 9.8  | 0.04   | 21.7  | 47.2  |
| 0.89    | 0.46   | -10   | 25   | 9    | 26   | 4   | 1009.1 | 4.1 | 179 | 6.2  | 0.036  | 18.9  | 62.4  |
| 1.15    | 0.80   | 0     | 27   | 14   | 29   | 1   | 1260.4 | 4.2 | 173 | 6.7  | 0.033  | 30    | 43.1  |
| 1.08    | 0.80   | -5    | 26   | 12   | 24   | 3   | 982.08 | 4.6 | 171 | 5.5  | <0.012 | 34.7  | 107   |
| 0.96    | 0.80   | 0     | 29   | 10   | 26.5 | 1   | 1771.8 | 4.4 | 194 | 5.9  | 0.447  | 14.8  | 44.5  |
| 1.03    | 1.09   | 0     | 24   | 18   | 26.5 | 4   | 1924   | 4.5 | 244 | 7    | 0.042  | 14.3  | 72.8  |
| 0.95    | 0.72   | 0     | 28   | 4    | 24.5 | 1   | 1790.5 | 4.2 | 165 | 6.6  | 0.022  | 25.9  | 29.7  |
| 0.93    | 0.83   | 0     | 29   | 14   | 27   | 2   | 1268.3 | 4.8 | 188 | 5.4  | 0.031  | 27.9  | 36    |
| 0.89    | 0.67   | 0     | 23   | 6    | 25.5 | 1   | 2281.7 | 4.4 | 175 | 6.3  | 0.14   | 23.4  | 48.7  |
| 0.89    | 0.73   | 0     | 30   | 3    | 28   | 1   | 2109.8 | 4.2 | 175 | 5.8  | 0.034  | 23.4  | 73    |
| 1.30    | 0.75   | -7    | 19   | 20   | 23.5 | 3   | 1950.4 | 4.8 | 186 | 7    | 0.356  | 18.1  | 42.4  |
| 1.22    | 0.89   | 0     | 30   | 7    | 27.5 | 0   | 2407.2 | 4.6 | 171 | 5.2  | 0.088  | 30.3  | 37.6  |
| 0.92    | 0.61   | 0     | 18   | 23   | 23.5 | 5   | 1548.1 | 4.2 | 177 | 6.4  | 0.436  | 37.1  | 49.8  |
| 0.84    | 0.82   | 0     | 28   | 0    | 25.5 | 1   | 2142.9 | 4.1 | 151 | 7.6  | 0.119  | 33.3  | 45.4  |
| 0.90    | 0.67   | 0     | 25   | 3    | 20.5 | 0   | 1169.4 | 4.7 | 166 | 4.5  | 0.026  | 37.1  | 40.4  |
| 1.05    | 0.77   | -5    | 15   | 12   | 26.5 | 3   | 780.88 | 4.3 | 169 | 5.3  | <0.012 | 28.6  | 40.8  |
| 1.12    | 0.86   | 0     | 27   | 0    | 28   | 2   | 1898.6 | 4.6 | 190 | 6.7  | 0.061  | 43.2  | 32.3  |
| 0.90    | 0.78   | 0     | 20   | 0    | 24.5 | 1   | 2138.9 | 4.4 | 192 | 7.1  | 0.452  | 28.3  | 72.7  |
|         | 0.75   | 0     | 22   | 0    | 25.5 | 3   | 1749.2 | 4.4 | 193 | 5.6  | 0.043  | 29.5  | 26    |
| 0.76    | 0.64   | 0     | 27   | 9    | 26.5 | 4   | 1407.3 | 4.4 | 199 | 6.2  | 0.036  | 33.2  | 32.4  |
| 1.17    | 0.72   | -8    | 16   | 3    | 28   | 3   | 2322.3 | 4.4 | 241 | 8.2  | 0.403  | 20.2  | 29    |
| 0.75    | 0.58   | 0     | 25   | 4    | 25   | 0   | 1691.9 | 4.2 | 205 | 5.6  | 0.034  | 27.1  | 12.8  |
| 0.75    | 0.73   | 0     | 20   | 0    | 28.5 | 4   | 2616.3 | 4.3 | 191 | 6    | 0.042  | 24.2  | 32.1  |
| 0.81    | 0.70   | 0     | 29   | 12   | 26   | 1   | 1848   | 4.3 | 215 | 5.9  | 0.055  | 28.6  | 57.6  |
| 1.17    | 0.84   | 0     | 25   | 6    | 22.5 | 3   | 1961.4 | 3.9 | 149 | 6.6  | 0.144  | 73.1  | 33.6  |
| 0.92    | 0.81   | 0     | 30   | 1    | 25.5 | 1   | 1280   | 4.6 | 167 | 5.3  | 0.094  | 42.4  | 54.7  |
| 1.04    | 0.71   | 0     | 28   | 37   | 25   | 3   | 1801.4 | 4   | 187 | 5.5  | <0.012 | 19    | 49.8  |
| 1.43    | 0.78   | 0     | 27   | 2    | 27.5 | 2   | 2868.8 | 4.4 | 192 | 5.7  | 0.207  | 14.9  | 81.7  |
| 0.91    | 0.74   | 0     | 12   | 39   | 17.5 | 0   | 2407.9 | 4.5 | 214 | 5.9  | <0.012 | 17.9  | 54.1  |
| 0.87    | 0.69   | 0     | 25   | 1    | 27   | 1   | 2257.6 | 3.7 | 99  | 5.5  | 0.853  | 31    | 26.1  |
| 0.72    | 0.74   | 0     | 19   | 7    | 20   | 2   | 2209   | 4   | 179 | 5.9  | 0.018  | 20.2  | 22.4  |
| 0.84    | 0.64   | 0     | 28   | 1    | 24.5 | 1   | 2824.7 | 4.2 | 193 | 5.8  | 0.024  | 18.1  | 38.2  |
| 0.76    | 0.71   | 0     | 24   | 4    | 27   | 0   | 1801.2 | 4.3 | 190 | 5.9  | 0.111  | 22.1  | 39.4  |
| 1.04    | 0.76   | -1    | 12   | 6    | 26   | 0   | 2578.5 | 4.7 | 221 | 5.9  | 0.066  | 16.5  | 47    |

|      |      |    |    |    |      |   |        |     |     |     |        |      |      |
|------|------|----|----|----|------|---|--------|-----|-----|-----|--------|------|------|
| 0.93 | 0.81 | 0  | 21 | 3  | 27.5 | 0 | 2351.4 | 4.5 | 160 | 6   | 0.263  | 15.7 | 18.4 |
| 1.25 | 1.08 | 0  | 28 | 8  | 27.5 | 0 | 1982   | 4.4 | 254 | 5.8 | 0.175  | 23.4 | 45.6 |
| 1.13 | 0.81 | 0  | 17 | 1  | 21.5 | 2 | 2171.6 | 4.4 | 156 | 6   | 0.079  | 39.9 | 44.5 |
|      |      | 0  | 17 | 4  | 28   | 2 | 2588   | 4.9 | 202 | 5.6 | 0.191  | 37.1 | 26   |
| 1.11 | 0.82 | 0  | 24 | 7  | 26   | 0 | 1948.8 | 4.3 | 197 | 5.7 | 0.628  | 22.2 | 26.1 |
| 0.93 | 0.86 | 0  | 28 | 0  | 27.5 | 3 | 1739.2 | 4.4 | 216 | 5.8 | 0.041  | 26.2 | 46.6 |
| 0.95 | 0.79 | 0  | 30 | 8  | 29   | 0 | 2681.6 | 4.5 | 232 | 6   | <0.012 | 42.5 | 13.9 |
| 1.37 | 0.92 | 0  | 23 | 0  | 29   | 3 | 1389   | 4.2 | 136 | 6.6 | 0.065  | 41.9 | 54.8 |
| 0.74 | 0.58 | 0  | 19 | 13 | 18   | 3 | 1800.2 | 4.4 | 262 | 6.1 | 0.035  | 38.6 | 33   |
| 1.12 | 0.80 | 0  | 28 | 0  | 26.5 | 0 | 1910.4 | 4.3 | 179 | 5.7 | 0.169  | 45.9 | 35.2 |
| 0.85 | 0.69 | 0  | 27 | 3  | 26   | 0 | 1719.6 | 3.9 | 182 | 5.8 | 0.036  | 31.8 | 64   |
| 0.92 | 0.74 | 0  | 25 | 2  | 20.5 | 1 | 1351.4 | 4   | 198 | 5.8 | 0.13   | 21.9 | 34.3 |
| 1.27 | 1.16 | 0  | 26 | 2  | 30   | 0 | 1469.1 | 4.6 | 233 | 5.6 | 0.015  | 17.7 | 24.5 |
| 1.13 | 0.98 | 0  | 30 | 1  | 25   | 1 | 1802.3 | 4.6 | 131 | 5.8 | <0.012 | 24.2 | 71.5 |
| 0.98 | 0.85 | 0  | 28 | 3  | 28.5 | 0 | 2547.8 | 4.8 | 172 | 6.4 | 0.028  | 35.7 | 28.5 |
| 1.19 | 1.00 | 0  | 28 | 3  | 28.5 | 0 | 1961.8 | 4   | 192 | 5.8 | 0.029  | 67   | 29.3 |
| 1.05 | 0.78 | 0  | 28 | 2  | 26.5 | 2 | 1278.4 | 4.2 | 188 | 8   | 0.018  | 44.4 | 36.6 |
| 0.99 | 0.81 | 0  | 27 | 0  | 26   | 0 | 1387.1 | 4.5 | 193 | 6   | 0.034  | 31.8 | 43.7 |
| 1.34 | 1.09 | 0  | 28 | 0  | 28   | 1 | 2511.3 | 4.3 | 183 | 6.5 | 0.16   | 35.3 | 24.4 |
| 1.13 | 0.63 | 0  | 29 | 0  | 26.5 | 0 | 1989   | 4.3 | 221 | 5.8 | 0.733  | 26.7 | 27.9 |
| 0.88 | 1.01 | 0  | 27 | 1  | 29   | 3 | 2050.1 | 4.6 | 217 | 6.4 | 0.152  | 38.2 | 21.8 |
| 0.97 | 0.69 | 0  | 22 | 0  | 26.5 | 0 | 1590.2 | 3.9 | 130 | 5.8 | 0.021  | 34.1 | 47.4 |
| 1.16 | 1.09 | 0  | 27 | 2  | 28.5 | 1 | 2419.1 | 4.3 | 148 | 5.8 | 0.023  | 31.8 | 30.5 |
| 0.92 | 0.71 | 0  | 26 | 17 | 26.5 | 2 | 3578.3 | 4.1 | 166 | 5.6 | 2.175  | 50.2 | 38.5 |
| 0.71 | 0.70 | 0  | 28 | 1  | 25.5 | 0 | 2777.2 | 4.5 | 169 | 5.7 | 0.015  | 18.5 | 96.8 |
| 1.30 | 1.00 | 0  | 28 | 0  | 28   | 0 | 1140.4 | 4.4 | 164 | 5.8 | <0.012 | 16   | 24.2 |
| 0.97 | 0.70 | 0  | 24 | 1  | 28.5 | 0 | 1997.2 | 4.6 | 265 | 6   | 0.067  | 22.1 | 48.3 |
| 1.10 | 0.85 | 0  | 28 | 4  | 27   | 0 | 2147.5 | 4.3 | 187 | 6   | 0.069  | 18.4 | 49.2 |
| 0.91 | 0.78 | 0  | 24 | 2  | 27.5 | 1 | 1309.7 | 4.1 | 215 | 6.1 | 0.046  | 24.2 | 79.5 |
| 1.07 | 0.88 | 0  | 20 | 6  | 25   | 2 | 2022.1 | 4.8 | 268 | 6.4 | 0.056  | 16.9 | 36.6 |
| 0.75 | 0.65 | 0  | 22 | 5  | 26.5 | 5 | 2642   | 4.4 | 201 | 9.1 | 0.217  | 24.7 | 28.4 |
| 0.92 | 0.76 | 0  | 29 | 0  | 29.5 | 1 | 1678.4 | 5   | 237 | 5.8 | 0.03   | 20.6 | 42.2 |
| 1.09 | 0.81 | 0  | 28 | 20 | 23   | 4 | 2886.8 | 4.7 | 189 | 7   | 1.056  | 13.5 | 27.2 |
| 1.09 | 0.76 | 0  | 24 | 2  | 25.5 | 1 | 1740.5 | 4.7 | 226 | 6   | <0.012 | 34.8 | 35.2 |
| 0.75 | 0.71 | 0  | 24 | 15 | 27   | 2 | 1781.6 | 4.3 | 216 | 5.9 | 0.022  | 17.8 | 37.6 |
| 1.34 | 1.16 | 0  | 25 | 2  | 22.5 | 1 | 2581   | 4.4 | 185 | 8.2 | 0.042  | 25.2 | 23.2 |
| 0.97 | 0.90 | 0  | 27 | 0  | 29   | 3 | 2321.4 | 4.4 | 193 | 5.9 | 0.028  | 39   | 33.1 |
| 0.97 | 0.91 | 0  | 25 | 0  | 27   | 0 | 2219.4 | 4.6 | 201 | 5.5 | 0.145  | 36.9 | 34.6 |
| 1.02 | 0.81 | 0  | 24 | 0  | 27.5 | 3 | 2200.4 | 4   | 146 | 5.9 | 0.543  | 31.7 | 64.3 |
| 1.04 | 0.74 | 0  | 23 | 28 | 21   | 2 | 3258.9 | 4.6 | 208 | 7.1 | 0.11   | 17.5 | 29.3 |
| 1.48 | 1.00 | 0  | 28 | 1  | 26   | 1 | 2261.3 | 4.1 | 186 | 5.7 | 0.062  | 31.7 | 13   |
| 0.95 | 0.82 | 0  | 26 | 5  | 28.5 | 1 | 1979.6 | 4.1 | 186 | 6.4 | 0.107  | 26.6 | 46.9 |
| 1.09 | 0.74 | 0  | 23 | 2  | 27   | 2 | 1328.4 | 4.3 | 149 | 5.4 | 0.456  | 32.9 | 20   |
| 0.89 | 0.71 | 0  | 28 | 4  | 28   | 0 | 1978.8 | 4.5 | 215 | 5.7 | 0.367  | 18.3 | 56.7 |
| 1.01 | 0.86 | 0  | 30 | 2  | 27.5 | 0 | 1717.8 | 4.3 | 257 | 5.6 | 0.237  | 17.9 | 24.5 |
| 0.97 | 0.71 | 0  | 26 | 0  | 24.5 | 0 | 1328   | 4.4 | 232 | 5.3 | <0.012 | 24.8 | 27.6 |
| 1.14 | 0.77 | 0  | 22 | 4  | 25.5 | 1 | 2326.3 | 4.2 | 170 | 8.2 | 0.068  | 26   | 31.9 |
| 1.18 | 0.94 | 0  | 28 | 13 | 28   | 2 | 1521.6 | 4.4 | 135 | 5.9 | 0.015  | 42.1 | 44   |
| 1.05 | 0.91 | 0  | 28 | 0  | 29.5 | 1 | 1909.4 | 4.2 | 207 | 5.3 | 0.044  | 20.7 | 24.5 |
| 1.38 | 0.91 | 0  | 27 | 1  | 27.5 | 2 | 2157.6 | 4.8 | 192 | 5.6 | 0.191  | 29   | 24   |
| 0.99 | 0.81 | 0  | 29 | 2  | 24.5 | 0 | 1519.2 | 4.2 | 199 | 4.8 | 0.049  | 30.1 | 26.1 |
| 1.10 | 0.80 | 0  | 27 | 5  | 25.5 | 1 | 3450.3 | 4.6 | 222 | 5.6 | 0.346  | 38.7 | 26.2 |
| 1.10 | 1.00 | 0  | 27 | 0  | 25   | 2 | 2920.2 | 4.2 | 211 | 6.3 | 0.413  | 31.8 | 27.6 |
| 1.29 | 0.98 | 0  | 29 | 0  | 26.5 | 0 | 1981.1 | 3.6 | 173 | 5.3 | 0.855  | 33.4 | 71.2 |
| 0.88 | 0.66 | 0  | 29 | 0  | 29.5 | 0 | 4268.9 | 4.7 | 248 | 6.1 | 0.098  | 11.7 | 39.4 |
| 1.19 | 0.92 | 0  | 29 | 0  | 28   | 0 | 1711.7 | 4.6 | 212 | 5.6 | 0.057  | 34.6 | 26.4 |
| 1.29 | 0.91 | 0  | 24 | 0  | 28   | 0 | 2470.4 | 4.4 | 170 | 6.9 | 0.173  | 22.6 | 43.2 |
| 1.00 | 0.88 | 0  | 25 | 4  | 28.5 | 1 | 2049.4 | 4.3 | 195 | 6.8 | 0.021  | 26.8 | 37.4 |
| 1.09 | 0.80 | 0  | 30 | 2  | 29   | 0 | 2298.9 | 4.5 | 187 | 5.9 | <0.012 | 39.1 | 32.1 |
| 1.09 | 0.99 | 0  | 25 | 4  | 27   | 0 | 2108.1 | 4.7 | 229 | 7.2 | 0.632  | 20.1 | 41.1 |
| 0.91 | 0.85 | -1 | 30 | 0  | 28   | 1 | 1467.8 | 4.6 | 149 | 6.1 | 0.015  | 42.1 | 50   |
| 1.02 | 0.80 | 0  | 30 | 0  | 27.5 | 0 | 1987.4 | 4.5 | 172 | 5.7 | 0.318  | 40   | 32.5 |
| 1.03 | 0.85 | 0  | 29 | 0  | 28   | 0 | 2061.9 | 4.4 | 176 | 5.7 | 0.041  | 17.4 | 49.3 |
| 1.19 | 0.95 | 0  | 30 | 0  | 27.5 | 0 | 1767.1 | 4.5 | 153 | 5.9 | 0.404  | 38.3 | 49.5 |
| 0.87 | 0.61 | 0  | 26 | 6  | 24   | 2 | 1751.4 | 4.2 | 155 | 6.2 | 0.031  | 21.5 | 47.4 |
| 0.78 | 0.67 | 0  | 26 | 2  | 26   | 0 | 2368.8 | 4.6 | 161 | 6   | 0.389  | 27.4 | 34.5 |
| 0.82 | 0.74 | -1 | 24 | 6  | 27   | 3 | 1578.1 | 4.1 | 196 | 5.9 | 0.05   | 23.3 | 41.7 |
| 1.17 | 0.91 | 0  | 29 | 0  | 27.5 | 0 | 1997   | 4.5 | 186 | 6.2 | 0.034  | 29.9 | 40.9 |
| 1.39 | 1.02 | 0  | 28 | 0  | 29.5 | 0 | 2311   | 4.4 | 174 | 5.1 | 0.081  | 21.9 | 34.4 |
| 1.19 | 0.97 | 0  | 26 | 1  | 26.5 | 3 | 3152.9 | 4.3 | 184 | 6   | 0.09   | 33.4 | 50.1 |
| 0.92 | 0.90 | 0  | 30 | 0  | 29.5 | 0 | 1551.1 | 4.3 | 205 | 5.6 | 0.014  | 32.3 | 16.9 |
| 0.80 | 0.68 | 0  | 16 | 3  | 25   | 4 | 1621.9 | 4.6 | 173 | 5.8 | 0.111  | 28.5 | 64.6 |

|      |      |    |    |    |      |   |        |     |     |      |        |      |      |
|------|------|----|----|----|------|---|--------|-----|-----|------|--------|------|------|
| 1.13 | 1.08 | 0  | 29 | 1  | 28.5 | 0 | 1269.4 | 4.8 | 242 | 5.7  | 0.014  | 38.9 | 29.7 |
| 0.90 | 0.78 | 0  | 23 | 0  | 26   | 1 | 2592.1 | 4.3 | 241 | 6.4  | 0.172  | 16.9 | 37.6 |
| 1.12 | 0.87 | 0  | 25 | 2  | 29.5 | 0 | 2801.4 | 4.7 | 247 | 6.5  | 0.133  | 14.8 | 23.8 |
| 1.03 | 0.84 | 0  | 25 | 42 | 24   | 0 | 3208.8 | 4.2 | 197 | 5.8  | 0.136  | 21.7 | 16.6 |
| 1.04 | 0.77 | 0  | 20 | 1  | 28   | 1 | 1768.6 | 4.6 | 192 | 5.5  | 0.039  | 31.8 | 29.1 |
| 0.96 | 0.68 | 0  | 26 | 0  | 29   | 0 | 2858.4 | 4.6 | 211 | 6    | 0.096  | 26.1 | 35.2 |
| 0.97 | 0.78 | 0  | 27 | 0  | 29   | 1 | 3198.5 | 4.7 | 258 | 6.4  | 1.335  | 18.3 | 55.5 |
|      |      | 0  | 29 | 0  | 28.5 | 2 | 1407.3 | 5.2 | 229 | 7.8  | 0.129  | 24.8 | 29.6 |
| 0.98 | 0.78 | 0  | 30 | 4  | 26.5 | 1 | 1909.2 | 4.6 | 199 | 5.6  | 0.344  | 32.4 | 36   |
| 0.98 | 0.72 | 0  | 30 | 6  | 28   | 0 | 1667.2 | 4.6 | 248 | 6.2  | 0.176  | 33.9 | 55.2 |
| 0.92 | 0.74 | 0  | 22 | 15 | 26.5 | 4 | 2593.5 | 5   | 129 | 6.9  | 0.443  | 23.6 | 33.9 |
| 0.66 | 0.65 | 0  | 23 | 2  | 21.5 | 4 | 1871.5 | 4   | 164 | 5.7  | 0.069  | 25.4 | 51.9 |
| 1.18 | 1.05 | 0  | 30 | 1  | 29.5 | 0 | 1599.3 | 4.5 | 191 | 5.6  | 0.019  | 30.6 | 34   |
| 1.22 | 0.99 | 0  | 29 | 18 | 25.5 | 4 | 2078.6 | 4.5 | 178 | 6.5  | <0.012 | 29.9 | 15.2 |
| 1.08 | 0.85 | 0  | 24 | 0  | 28.5 | 0 | 1840   | 4.4 | 169 | 5.5  | 0.268  | 26.6 | 68.3 |
| 1.10 | 0.81 | 0  | 30 | 0  | 27.5 | 3 | 1522.8 | 4.4 | 233 | 5.7  | 0.109  | 17.2 | 42.5 |
| 1.21 | 0.96 | 0  | 25 | 0  | 28.5 | 1 | 1271.7 | 4.6 | 159 | 7    | 0.039  | 19.7 | 61.2 |
| 0.92 | 0.80 | 0  | 30 | 1  | 29.5 | 0 | 1609.9 | 4.4 | 238 | 6.1  | 0.035  | 23.4 | 40.4 |
| 0.79 | 0.77 | 0  | 29 | 7  | 28   | 2 | 3113   | 4.7 | 176 | 6.4  | 0.12   | 22.5 | 51.8 |
| 0.87 | 0.62 | 0  | 26 | 3  | 25   | 1 | 2390.4 | 4.8 | 235 | 6.1  | 0.211  | 25   | 33.2 |
| 1.01 | 0.78 | 0  | 27 | 5  | 28.5 | 0 | 2089.5 | 4.7 | 237 | 5.8  | 0.043  | 23.1 | 10.1 |
| 1.16 | 0.67 | 0  | 29 | 13 | 28   | 2 | 2160   | 4.8 | 208 | 7.1  | 0.321  | 25.4 | 14.9 |
| 0.97 | 0.97 | 0  | 26 | 7  | 28.5 | 0 | 3041.5 | 4.5 | 220 | 6    | 0.075  | 27.4 | 46   |
| 1.10 | 0.91 | 0  | 30 | 0  | 28   | 0 | 1210.3 | 4   | 148 | 5.6  | <0.012 | 21   | 71.8 |
| 1.47 | 1.13 | 0  | 29 | 8  | 28   | 3 | 1039.9 | 4.2 | 205 | 6    | 1.088  | 31.6 | 74.9 |
| 0.93 | 0.73 | 0  | 24 | 0  | 28.5 | 1 | 1940.5 | 4.2 | 232 | 5.9  | 0.724  | 20.2 | 35.3 |
| 1.46 | 0.96 | 0  | 23 | 9  | 25.5 | 3 | 1598.3 | 4.3 | 182 | 6.8  | 0.131  | 26.4 | 21.3 |
| 0.91 | 0.60 | -3 | 17 | 4  | 27.5 | 2 | 1506.8 | 4.3 | 225 | 5.6  | 0.066  | 22.1 | 56.7 |
| 0.93 | 0.70 | 0  | 28 | 1  | 23.5 | 2 | 1642   | 4.5 | 240 | 5.7  | <0.012 | 29.9 | 24.5 |
| 0.83 | 0.64 | 0  | 23 | 0  | 28   | 0 | 2399.4 | 4.4 | 246 | 5.8  | 0.168  | 14.8 | 47.9 |
| 1.17 | 0.74 | 0  | 29 | 0  | 29   | 1 | 2213.7 | 4.6 | 183 | 7.2  | 0.057  | 18.9 | 79   |
|      | 0.78 | 0  | 27 | 17 | 26   | 0 | 1070.7 | 4.2 | 249 | 6    | 1.575  | 21.5 | 28.1 |
| 1.07 | 0.89 | 0  | 21 | 19 | 25.5 | 0 | 2022.5 | 4.7 | 208 | 6.3  | 0.252  | 29.7 | 35.2 |
| 0.85 | 0.70 | 0  | 30 | 7  | 28.5 | 0 | 2127.4 | 4.4 | 196 | 6    | 0.026  | 32.2 | 22.3 |
| 0.85 | 0.89 | 0  | 30 | 11 | 26.5 | 2 | 1972.8 | 4.3 | 176 | 6.2  | 0.735  | 21   | 38.8 |
| 1.14 | 1.15 | 0  | 29 | 6  | 23.5 | 1 | 5059.8 | 5   | 195 | 16.1 | 0.156  | 24.5 | 14.9 |
| 1.13 | 0.95 | 0  | 27 | 6  | 26   | 1 | 1382   | 3.8 | 131 | 6    | 0.104  | 44.1 | 41   |
| 1.11 | 1.05 | 0  | 29 | 0  | 30   | 0 | 1999.8 | 4.2 | 208 | 5.6  | 0.022  | 25   | 38.3 |
| 1.09 | 0.78 | 0  | 29 | 0  | 28.5 | 1 | 1978   | 4.6 | 134 | 7.5  | 0.07   | 26.5 | 46.9 |
| 1.13 | 0.89 | 0  | 25 | 8  | 26   | 1 | 2711.7 | 4.8 | 174 | 7.9  | 0.03   | 28   | 22.6 |
| 0.91 | 0.63 | 0  | 14 | 5  | 26   | 3 | 1141.1 | 4.6 | 168 | 5.7  | 0.075  | 35.9 | 36.3 |
| 1.10 | 0.87 | 0  | 27 | 6  | 28.5 | 1 | 1739.9 | 4.5 | 168 | 6    | 0.024  | 27   | 39.6 |
| 0.83 | 0.89 | 0  | 17 | 31 | 25   | 2 | 1769.8 | 4   | 169 | 6.2  | 0.05   | 28.8 | 47.6 |
| 1.10 | 0.92 | 0  | 27 | 0  | 28.5 | 0 | 2620   | 4.7 | 258 | 6.3  | 0.434  | 25.4 | 30.3 |
| 1.07 | 0.84 | 0  | 28 | 0  | 28.5 | 0 | 2130.4 | 4.3 | 157 | 5.6  | 0.101  | 22.5 | 22.7 |
| 0.97 | 0.85 | 0  | 26 | 0  | 28   | 0 | 2118.2 | 4.3 | 211 | 5.3  | 0.05   | 38.9 | 43.4 |
| 1.05 | 0.77 | 0  | 29 | 2  | 27.5 | 0 | 1149.9 | 4.6 | 179 | 5.8  | <0.012 | 21.3 | 21.5 |
| 1.15 | 0.79 | -1 | 26 | 0  | 28.5 | 1 | 1498.6 | 4.3 | 193 | 6.6  | 0.1    | 43.8 | 35.7 |
| 1.03 | 0.91 | 0  | 26 | 3  | 26.5 | 1 | 1168.5 | 4.3 | 165 | 5.9  | 0.034  | 35.6 | 38.8 |
| 0.76 | 0.60 | 0  | 16 | 4  | 21   | 1 | 2182.3 | 4.5 | 158 | 7.3  | 1.038  | 34.6 | 57.6 |
| 0.92 | 0.95 | 0  | 30 | 5  | 28.5 | 0 | 2019.3 | 4.2 | 152 | 5.8  | 0.013  | 31.2 | 14.5 |
| 1.29 | 0.84 | 0  | 24 | 3  | 28   | 0 | 2812   | 4.6 | 196 | 6.4  | 0.155  | 25.4 | 70.3 |
| 1.03 | 0.73 | 0  | 30 | 0  | 28.5 | 1 | 2779.9 | 4.5 | 255 | 6.1  | 0.063  | 19.5 | 58.7 |
| 1.16 | 0.83 | 0  | 30 | 14 | 27.5 | 0 | 1306.9 | 4.4 | 151 | 5.4  | 0.421  | 29.8 | 27.2 |
| 0.90 | 0.64 | 0  | 22 | 6  | 28.5 | 0 | 1542.3 | 4.5 | 190 | 5.7  | 0.534  | 22.9 | 41.4 |
| 0.73 | 0.69 | 0  | 23 | 3  | 26.5 | 0 | 2212   | 4.5 | 223 | 5.8  | 0.029  | 20   | 33.5 |
| 0.78 | 0.83 | 0  | 28 | 8  | 26.5 | 0 | 1162.2 | 4.7 | 201 | 5.3  | 0.096  | 28.3 | 32.7 |
| 0.73 | 0.53 | 0  | 24 | 6  | 29.5 | 0 | 1429.1 | 4.6 | 206 | 5.9  | 0.017  | 34.6 | 33.5 |
| 0.92 | 0.64 | 0  | 28 | 0  | 28   | 0 | 2621.4 | 4.3 | 228 | 5.4  | 0.024  | 15.1 | 98.3 |
| 1.27 | 1.03 | 0  | 26 | 11 | 26.5 | 1 | 2553.2 | 4.8 | 207 | 6.8  | 0.249  | 26.2 | 71.2 |
| 1.17 | 0.96 | 0  | 28 | 14 | 25.5 | 1 | 1551.6 | 4.8 | 217 | 5.4  | <0.012 | 37.4 | 15.6 |
| 1.00 | 1.01 | 0  | 30 | 0  | 27.5 | 0 | 1818.2 | 4.4 | 177 | 6.3  | 0.089  | 25.4 | 51.2 |
| 1.37 | 0.94 | 0  | 30 | 1  | 24.5 | 3 | 1441.4 | 5   | 140 | 9.1  | 0.052  | 33.2 | 26   |
| 1.25 | 0.99 | 0  | 30 | 0  | 29.5 | 2 | 2753.6 | 4.4 | 231 | 8.9  | 0.22   | 19.4 | 28   |
| 0.89 | 0.89 | 0  | 26 | 2  | 29   | 0 | 1448.9 | 4   | 169 | 5.7  | 0.09   | 30.3 | 39.8 |
| 1.15 | 0.90 | 0  | 30 | 4  | 28.5 | 0 | 2292.8 | 4.7 | 222 | 6    | 0.497  | 12.8 | 52.8 |
| 1.34 | 1.14 | 0  | 26 | 24 | 28   | 1 | 2272.7 | 5.1 | 248 | 12.6 | 0.262  | 7.4  | 17.2 |
| 1.10 | 0.82 | 0  | 18 | 5  | 27   | 0 | 1622.4 | 4.5 | 161 | 6.1  | 0.138  | 36.4 | 28.8 |
| 1.14 | 0.89 | 0  | 29 | 5  | 27.5 | 0 | 1241.5 | 4.3 | 216 | 5.8  | 0.036  | 19.9 | 46.2 |
| 1.10 | 0.84 | 0  | 29 | 1  | 28.5 | 0 | 2889.6 | 4.6 | 234 | 5.4  | 0.146  | 14.1 | 17.3 |
| 0.94 | 1.03 | 0  | 28 | 3  | 26   | 1 | 1983.4 | 4.8 | 155 | 8    | 0.707  | 20.1 | 34.9 |
| 1.19 | 0.89 | 0  | 24 | 0  | 26.5 | 5 | 1652   | 4.7 | 192 | 6.7  | <0.012 | 25   | 58.9 |

|      |      |      |    |    |      |   |        |     |     |      |        |      |      |
|------|------|------|----|----|------|---|--------|-----|-----|------|--------|------|------|
| 1.27 | 0.69 | 0    | 28 | 2  | 27   | 1 | 2857.1 | 4.5 | 207 | 6.5  | 0.09   | 19.3 | 38.8 |
| 1.03 | 0.89 | 0    | 30 | 3  | 27   | 0 | 1517.3 | 4.5 | 166 | 5.7  | <0.012 | 24.1 | 27.1 |
| 0.77 | 0.87 | 0    | 28 | 1  | 28   | 0 | 1842.5 | 4.3 | 265 | 5.6  | 0.016  | 29.4 | 48.2 |
| 0.79 | 0.69 | 0    | 20 | 1  | 27.5 | 0 | 1992.7 | 4.6 | 211 | 5.7  | <0.012 | 25.7 | 31.5 |
|      |      | 0    | 29 | 1  | 27   | 1 | 2218.4 | 4.5 | 179 | 7.1  | 0.269  | 19.4 | 70   |
| 0.70 | 0.70 | 0    | 21 | 6  | 27   | 8 | 979.17 | 3.7 | 157 | 5    | 0.241  | 21.9 | 32.7 |
| 1.06 | 0.89 | 0    | 29 | 1  | 29   | 1 | 2121.6 | 4.3 | 177 | 5.7  | 0.186  | 22.5 | 40.3 |
| 1.14 | 0.75 | 0    | 29 | 44 | 28.5 | 0 | 2882.8 | 4.6 | 240 | 6.1  | 0.411  | 18.7 | 39   |
| 1.25 | 0.72 | 0    | 26 | 4  | 27   | 0 | 1330.6 | 4.2 | 190 | 6.1  | 0.247  | 26.9 | 66   |
| 0.97 | 0.85 | 0    | 27 | 1  | 29   | 0 | 1500.9 | 4.7 | 185 | 6.2  | 0.047  | 19.9 | 22.7 |
| 0.70 | 0.57 | 0    | 24 | 21 | 27   | 0 | 1381.6 | 4.6 | 220 | 5.8  | 0.056  | 10.1 | 34.1 |
| 1.16 | 0.80 | 0    | 16 | 6  | 28.5 | 1 | 2051.3 | 4.5 | 172 | 8.2  | 1.162  | 21.6 | 18.2 |
| 1.15 | 0.81 | 0    | 29 | 2  | 28.5 | 1 | 1978   | 4.5 | 142 | 6.5  | <0.012 | 39.2 | 50.8 |
| 1.06 | 0.94 | 0    | 29 | 4  | 28.5 | 1 | 2831.4 | 4.4 | 207 | 9    | 0.728  | 14.5 | 45.1 |
| 0.71 | 0.64 | 0    | 25 | 1  | 29   | 0 | 1438.1 | 4.3 | 222 | 5.4  | 0.042  | 28.8 | 56.6 |
| 1.03 | 0.83 | 0    | 30 | 2  | 29.5 | 1 | 2497.9 | 4.6 | 247 | 12   | 0.704  | 15.5 | 24   |
| 0.94 | 0.65 | -2   | 20 | 2  | 25   | 4 | 2852.9 | 4.3 | 128 | 5.7  | 0.029  | 28.4 | 30.5 |
| 1.06 | 0.67 | 0    | 27 | 0  | 29   | 0 | 2542   | 4.3 | 187 | 5.6  | 0.201  | 25.3 | 34.2 |
|      |      | 0    | 19 | 2  | 23.5 | 2 | 2309.6 | 4.4 | 289 | 6.2  | 0.195  | 21.5 | 22.4 |
| 1.00 | 0.75 | 0    | 27 | 3  | 29   | 0 | 2530.4 | 4.6 | 236 | 6.7  | 0.016  | 25.4 | 46.5 |
| 1.06 | 0.96 | 0    | 29 | 0  | 30   | 2 | 3467   | 4.6 | 244 | 5.1  | 0.281  | 25.8 | 53.6 |
| 1.17 | 1.16 | 0    | 30 | 0  | 29.5 | 0 | 1058.6 | 4.6 | 189 | 6.1  | 0.06   | 21.5 | 30.4 |
| 1.31 | 1.05 | 0    | 28 | 0  | 29   | 0 | 2100.8 | 4.5 | 209 | 5.8  | 0.089  | 27.5 | 34.9 |
| 0.98 | 0.95 | -1   | 26 | 13 | 24   | 1 | 1909.5 | 4.4 | 152 | 5.4  | <0.012 | 22.4 | 42.8 |
| 0.96 | 0.76 | 0    | 28 | 0  | 29   | 0 | 1841.9 | 4.5 | 213 | 5.3  | <0.012 | 28   | 42.8 |
| 1.30 | 0.93 | 0    | 25 | 9  | 24   | 5 | 2299.4 | 4.6 | 110 | 7.3  | 0.161  | 41.6 | 52   |
| 0.91 | 0.92 | 0    | 30 | 4  | 29   | 1 | 2051.6 | 4.4 | 176 | 8    | 0.26   | 25.2 | 44   |
| 1.13 | 0.98 | 0    | 29 | 2  | 27   | 0 | 2087   | 4.4 | 157 | 5.8  | 0.124  | 20.6 | 20.2 |
| 0.84 | 0.73 | 0    | 23 | 4  | 28   | 0 | 1670.6 | 4.7 | 205 | 5.6  | 0.031  | 19.8 | 37.5 |
| 0.98 | 1.03 | 0    | 26 | 2  | 27.5 | 1 | 3079.9 | 4.6 | 215 | 5.8  | 0.027  | 24   | 45.1 |
| 0.89 | 0.78 | 0    | 24 | 2  | 27.5 | 1 | 1471.1 | 4.4 | 143 | 5.2  | <0.012 | 16.1 | 55.8 |
| 1.29 | 0.96 | 0    | 29 | 4  | 25.5 | 3 | 2891.4 | 4.6 | 180 | 6.5  | 0.196  | 26.2 | 23.8 |
| 0.91 | 0.85 | 0    | 29 | 6  | 29.5 | 0 | 1789.6 | 4.2 | 207 | 5.5  | 0.037  | 24.4 | 28.9 |
|      |      | 0    | 22 | 2  | 28.5 | 0 | 2537.1 | 4.2 | 227 | 5.7  | 0.018  | 19.9 | 39.3 |
|      |      | 0    | 26 | 8  | 27   | 0 | 1960.2 | 4.5 | 141 | 5.8  | 0.166  | 18.8 | 50.7 |
| 1.01 | 0.94 | 0    | 28 | 3  | 30   | 1 | 940    | 4.5 | 218 | 5.4  | 0.042  | 26.2 | 47.2 |
| 0.97 | 0.76 | 0    | 29 | 0  | 29   | 0 | 1531.7 | 4.4 | 218 | 5.6  | 0.192  | 32.9 | 25.4 |
|      |      | 0    | 30 | 1  | 28   | 0 | 1901.8 | 4.7 | 156 | 5.9  | 0.014  | 21.7 | 92.3 |
| 0.81 | 0.56 | 0    | 24 | 1  | 27.5 | 2 | 1906.8 | 4.3 | 196 | 6.1  | 0.58   | 19.4 | 46.1 |
| 1.71 | 1.02 | -5   | 30 | 15 | 25.5 | 7 | 1939.7 | 4.1 | 150 | 8.2  | 0.109  | 29.1 | 53.7 |
| 1.34 | 1.08 | 0    | 28 | 2  | 27.5 | 1 | 1622.3 | 4.7 | 186 | 6.6  | 0.176  | 28.5 | 41.7 |
| 1.18 | 1.15 | 0    | 28 | 5  | 28   | 0 | 1899.8 | 4.7 | 202 | 5.4  | 0.031  | 23.6 | 34.5 |
| 0.78 | 0.62 | 0    | 24 | 4  | 18   | 1 | 220.66 | 4.1 | 182 | 7.3  | 0.475  | 22.4 | 48.3 |
| 0.76 | 0.76 | 0    | 20 | 2  | 27.5 | 2 | 2390.3 | 4.4 | 160 | 6.5  | 0.036  | 26.4 | 45.1 |
| 1.06 | 0.74 | 0    | 29 | 1  | 26.5 | 4 | 1907.7 | 4.6 | 182 | 5.5  | <0.012 | 24.5 | 39   |
| 1.18 | 0.68 | 0    | 29 | 19 | 28   | 0 | 1947.7 | 4.7 | 179 | 5.2  | 0.205  | 22.1 | 40.3 |
| 1.27 | 0.93 | 0    | 30 | 0  | 27   | 0 | 3148.2 | 4.6 | 179 | 6.4  | 0.106  | 15.1 | 26   |
|      | 0.66 | 0    | 20 | 0  | 29.5 | 0 | 2950.7 | 4.7 | 175 | 5.5  | 0.395  | 26.7 | 55.2 |
| 1.04 | 0.78 | 0    | 26 | 2  | 27   | 1 | 1971.1 | 4.6 | 187 | 7.4  | 0.039  | 18.8 | 33.5 |
| 0.99 | 0.89 | 0    | 29 | 0  | 27.5 | 0 | 1641.9 | 4.6 | 214 | 5.7  | 0.048  | 25.1 | 29   |
| 1.08 | 0.80 | 0    | 28 | 8  | 27   | 4 | 1287.8 | 4.5 | 149 | 5.2  | 0.173  | 24.1 | 33.1 |
| 0.96 | 0.71 | 0    | 21 | 3  | 26.5 | 3 | 3933.5 | 4.5 | 215 | 13.3 | 0.131  | 27.3 | 39.6 |
| 1.11 | 0.96 | 0    | 27 | 2  | 26   | 2 | 1562.2 | 4.4 | 171 | 5.9  | <0.012 | 39.5 | 27   |
| 1.20 | 0.82 | -1   | 30 | 0  | 29   | 7 | 1401.7 | 4.6 | 188 | 6.5  | 0.033  | 29.7 | 36.4 |
|      |      | 0    | 23 | 4  | 28   | 0 | 1698   | 4.8 | 179 | 5.3  | 0.019  | 32   | 35.1 |
| 1.11 | 0.91 | 0    | 28 | 0  | 28.5 | 0 | 1179   | 4.5 | 139 | 5.3  | 0.017  | 28.1 | 35.6 |
| 1.20 | 0.93 | 0    | 28 | 0  | 28.5 | 1 | 1511.6 | 4.5 | 155 | 5.4  | 0.065  | 28.7 | 34.6 |
| 1.19 | 0.95 | 0    | 25 | 5  | 27.5 | 0 | 1639.4 | 4.4 | 209 | 5.8  | 0.066  | 23.3 | 33.9 |
| 0.83 | 0.70 | 0    | 22 | 1  | 30   | 0 | 1680.3 | 4.2 | 287 | 5.6  | 0.055  | 24.1 | 46.7 |
| 1.06 | 0.80 | 0    | 23 | 1  | 27   | 1 | 1771.6 | 4.5 | 164 | 6.6  | 0.015  | 24.8 | 32.9 |
| 0.81 | 0.76 | 0    | 29 | 1  | 28   | 0 | 2530   | 4.5 | 211 | 6    | 0.232  | 18.2 | 79.4 |
|      |      | 0    | 16 | 26 | 23   | 0 | 1421.3 | 4.3 | 217 | 6    | 0.044  | 30.8 | 36.5 |
| 1.22 | 0.95 | 0    | 28 | 1  | 28.5 | 0 | 2070.3 | 4.6 | 267 | 5.2  | 0.046  | 30.4 | 46.1 |
|      | 0.60 | -0.5 | 24 | 1  | 27   | 0 | 1300   | 4.4 | 186 | 5.8  | 0.02   | 24.3 | 41.2 |
| 1.24 | 0.84 | 0    | 29 | 3  | 27.5 | 1 | 2090.7 | 4.6 | 186 | 5.9  | 0.333  | 26.2 | 34.2 |
| 0.89 | 0.91 | 0    | 28 | 1  | 25.5 | 0 | 2122.3 | 4.5 | 190 | 4.8  | 0.325  | 35.4 | 24.7 |
| 0.93 | 0.65 | -2.5 | 25 | 9  | 26.5 | 0 | 2341.9 | 4.5 | 197 | 6.2  | 0.042  | 19.9 | 60.6 |
| 1.15 | 1.04 | 0    | 24 | 0  | 28   | 0 | 1748.5 | 4.2 | 174 | 5.7  | 0.287  | 27.4 | 53.8 |
| 0.89 | 0.60 | -2   | 23 | 13 | 25.5 | 2 | 1188.2 | 4   | 250 | 6.1  | 1.539  | 24.5 | 25.8 |
| 0.94 | 0.82 | 0    | 30 | 4  | 24   | 1 | 1480.1 | 4.7 | 175 | 6.5  | 0.042  | 8.1  | 84.5 |
| 1.15 | 0.79 | 0    | 21 | 0  | 28   | 3 | 1738.8 | 4.8 | 161 | 6    | 0.021  | 29.8 | 38.1 |
| 1.14 | 0.79 | 0    | 25 | 8  | 25   | 2 | 1430.6 | 4.5 | 177 | 7.1  | 0.028  | 26.1 | 9.7  |

|      |      |       |    |    |      |   |        |     |     |      |        |      |       |
|------|------|-------|----|----|------|---|--------|-----|-----|------|--------|------|-------|
| 0.85 | 0.68 | 0     | 23 | 2  | 23   | 2 | 889.44 | 4.6 | 220 | 5.1  | 0.023  | 30.9 | 34.5  |
| 0.77 | 0.70 | -1    | 26 | 1  | 30   | 2 | 1700.3 | 4.2 | 219 | 5.8  | 0.082  | 21.9 | 63.6  |
| 0.84 | 0.83 | 0     | 26 | 5  | 25.5 | 0 | 2201.5 | 4.6 | 224 | 5.6  | 0.04   | 18.7 | 50.4  |
|      | 1.08 | 0     | 26 | 0  | 29   | 1 | 858.88 | 4.6 | 114 | 8    | <0.012 | 31.9 | 16.4  |
| 0.91 | 0.94 | 0     | 27 | 23 | 29   | 0 | 1450.4 | 4.1 | 218 | 5.5  | 0.028  | 20.4 | 43.3  |
| 1.06 | 0.73 | 0     | 27 | 2  | 27.5 | 0 | 1769.6 | 4.9 | 215 | 5.6  | 0.143  | 27.9 | 40.5  |
| 0.94 | 0.82 | 0     | 25 | 20 | 28.5 | 0 | 1708   | 4.4 | 205 | 5.6  | 0.017  | 21.9 | 30.6  |
| 0.95 | 0.81 | 0     | 28 | 1  | 29   | 0 | 2170   | 5   | 216 | 6.1  | 0.481  | 19.7 | 15.1  |
|      | 0.58 | 0     | 14 | 9  | 28.5 | 2 | 1531.8 | 4.3 | 192 | 5.4  | 0.059  | 10.7 | 109.5 |
| 0.98 | 0.66 | 0     | 26 | 0  | 27.5 | 2 | 2067.1 | 4.2 | 234 | 6    | 0.245  | 24.3 | 35.7  |
| 0.65 | 0.38 | -34.5 | 11 | 22 | 15   | 3 | 1649.2 | 4.7 | 202 | 6.7  | 0.105  | 18.6 | 46.5  |
|      |      | 0     | 28 | 1  | 25.5 | 0 | 2620.8 | 4.2 | 128 | 5.6  | 0.178  | 30.3 | 118.5 |
| 0.86 | 0.75 | 0     | 21 | 4  | 27.5 | 1 | 2338.6 | 4.7 | 130 | 8.9  | 0.121  | 23.6 | 25.8  |
| 0.88 | 0.85 | 0     | 24 | 3  | 28.5 | 0 | 1699.5 | 4.6 | 292 | 4.6  | 0.063  | 28.2 | 40.2  |
| 1.10 | 0.78 | 0     | 27 | 3  | 28   | 2 | 3714.8 | 4.5 | 127 | 8.8  | 0.366  | 19.3 | 33    |
| 1.14 | 1.09 | 0     | 22 | 0  | 27.5 | 1 | 1890.2 | 4.3 | 251 | 4.9  | 0.151  | 34.8 | 53.8  |
| 0.89 | 0.88 | 0     | 18 | 19 | 28.5 | 0 | 1941.4 | 4.6 | 163 | 5.9  | <0.012 | 20.1 | 63.8  |
| 0.85 | 0.69 | 0     | 29 | 0  | 29   | 1 | 2071.7 | 4.6 | 245 | 8.4  | 0.715  | 25   | 32.4  |
| 0.88 | 0.71 | 0     | 28 | 0  | 26   | 0 | 1852.5 | 4.7 | 216 | 6    | 1.378  | 20.6 | 27.8  |
| 1.02 | 0.93 | 0     | 29 | 3  | 29   | 0 | 2798.2 | 4.5 | 175 | 6    | 0.067  | 30.4 | 36.8  |
| 1.10 | 0.87 | 0     | 29 | 1  | 28   | 0 | 1946.5 | 4.6 | 136 | 5.9  | 0.081  | 27.6 | 33.5  |
| 1.20 | 0.74 | -1    | 23 | 4  | 27   | 0 | 2090.8 | 4.1 | 140 | 5.3  | 0.087  | 34.8 | 36.8  |
| 1.07 | 0.87 | 0     | 25 | 9  | 27   | 1 | 1281.4 | 4.3 | 197 | 5.7  | 0.039  | 25.5 | 75    |
| 1.13 | 1.12 | 0     | 26 | 2  | 29.5 | 0 | 1916.8 | 4.7 | 189 | 6.6  | 0.025  | 24.2 | 54.7  |
| 1.04 | 0.75 | 0     | 30 | 0  | 28   | 1 | 1188.5 | 4.6 | 182 | 6.2  | 6.429  | 26.6 | 21.2  |
| 1.00 | 0.75 | 0     | 24 | 0  | 28.5 | 1 | 2452.1 | 4.5 | 149 | 7.5  | 0.064  | 39.2 | 35    |
| 0.95 | 0.76 | 0     | 23 | 4  | 27.5 | 2 | 1701.8 | 4.5 | 156 | 5.8  | 0.051  | 34.4 | 35.8  |
| 0.74 | 0.58 | 0     | 15 | 5  | 26   | 2 | 1449.4 | 4.4 | 255 | 6.6  | 0.028  | 23.3 | 21.6  |
| 0.78 | 0.64 | 0     | 24 | 3  | 28.5 | 3 | 1452   | 4.4 | 231 | 5.9  | 0.159  | 26.4 | 44.7  |
| 1.08 | 0.67 | 0     | 27 | 14 | 24.5 | 0 | 1642.3 | 4.6 | 135 | 5.6  | 0.097  | 20.8 | 31.2  |
| 0.81 | 0.85 | 0     | 23 | 2  | 26   | 0 | 1658   | 4.5 | 187 | 5    | 0.038  | 36.5 | 50.2  |
| 0.87 | 0.67 | -1    | 24 | 0  | 26.5 | 5 | 2651.3 | 3.7 | 206 | 5.3  | 0.013  | 19.5 | 43.1  |
| 0.88 | 0.67 | 0     | 30 | 1  | 28   | 2 | 2960.7 | 4.6 | 262 | 5.6  | 0.051  | 25.8 | 32    |
| 0.78 | 0.61 | 0     | 19 | 6  | 26.5 | 0 | 1548.8 | 4.8 | 238 | 4.9  | 0.151  | 29.7 | 53.2  |
| 1.28 | 0.82 | 0     | 25 | 1  | 28.5 | 1 | 1456.9 | 4.3 | 124 | 5.1  | 0.298  | 45   | 33.8  |
| 1.22 | 1.06 | 0     | 29 | 0  | 27.5 | 1 | 1848   | 4.7 | 185 | 6.5  | 0.046  | 33.2 | 32.7  |
| 0.99 | 0.82 | 0     | 27 | 0  | 28.5 | 1 | 1471.7 | 4.3 | 159 | 5.8  | 1.96   | 40.6 | 50.9  |
| 1.15 | 1.02 | 0     | 28 | 0  | 27.5 | 1 | 2471.6 | 4.7 | 228 | 6.8  | 0.046  | 28.5 | 60.6  |
| 0.88 | 0.57 | 0     | 25 | 18 | 22   | 2 | 1926   | 4.8 | 118 | 7.2  | 0.539  | 29.4 | 37.7  |
| 1.39 | 0.96 | 0     | 26 | 4  | 29.5 | 2 | 1647.8 | 4.1 | 159 | 5.6  | 0.409  | 36.5 | 33.4  |
| 1.10 | 0.97 | 0     | 29 | 0  | 27.5 | 0 | 1822.1 | 4.7 | 126 | 5.3  | <0.012 | 31.2 | 13.3  |
| 1.03 | 0.82 | 0     | 28 | 0  | 29.5 | 0 | 3638.1 | 4.3 | 216 | 6.6  | 0.113  | 21.7 | 23.4  |
| 0.89 | 0.69 | 0     | 16 | 30 | 24.5 | 2 | 2161   | 4.6 | 215 | 5.7  | 0.071  | 18.5 | 42.3  |
| 1.13 | 0.91 | 0     | 29 | 2  | 29   | 0 | 2612.4 | 4.3 | 221 | 5.7  | 0.037  | 30.6 | 46.6  |
| 1.17 | 0.81 | 0     | 29 | 0  | 27   | 2 | 1910.5 | 4.8 | 136 | 6.3  | <0.012 | 27   | 30.8  |
| 0.86 | 0.71 | 0     | 28 | 6  | 26.5 | 1 | 2740.2 | 4.6 | 164 | 8.1  | 0.223  | 26.7 | 28.5  |
| 1.07 | 0.95 | 0     | 24 | 0  | 23.5 | 1 | 1461.7 | 4.9 | 143 | 5.3  | 0.017  | 24   | 22.9  |
| 1.07 | 0.80 | 0     | 30 | 0  | 29   | 2 | 2001   | 4.4 | 193 | 5.9  | 0.069  | 27   | 60.3  |
|      |      | -12   | 15 | 17 | 20   | 2 | 2111.2 | 4.4 | 197 | 5.6  | 0.152  | 19.6 | 70.4  |
| 0.95 | 0.75 | 0     | 29 | 1  | 27   | 1 | 1937.1 | 4.6 | 248 | 5.5  | 0.075  | 37.7 | 22.8  |
| 1.03 | 0.76 | 0     | 26 | 6  | 23.5 | 3 | 1149.3 | 4.3 | 214 | 5.8  | <0.012 | 26.4 | 29.4  |
| 1.01 | 0.74 | 0     | 28 | 16 | 28   | 1 | 2661.7 | 3.9 | 213 | 6.2  | 0.255  | 25.2 | 72.4  |
| 1.16 | 0.72 | -0.5  | 29 | 0  | 28   | 5 | 1501.5 | 4.1 | 176 | 6.8  | 0.15   | 21.2 | 14.4  |
| 1.13 | 0.87 | 0     | 27 | 1  | 29.5 | 0 | 1620.1 | 4.4 | 191 | 5.7  | 0.128  | 25.6 | 54.9  |
| 1.34 | 0.91 | 0     | 23 | 3  | 27.5 | 0 | 1197.8 | 4.5 | 140 | 5.8  | 0.521  | 22.9 | 33.6  |
| 0.90 | 0.75 | 0     | 25 | 3  | 26.5 | 1 | 3318.2 | 4.3 | 247 | 9.7  | 0.032  | 21.2 | 26.4  |
| 1.16 | 0.92 | 0     | 25 | 12 | 29   | 0 | 2343.2 | 4.5 | 249 | 6.1  | 0.235  | 18.8 | 33.4  |
| 1.09 | 0.85 | 0     | 21 | 0  | 24.5 | 6 | 2667   | 4.6 | 143 | 6.8  | 0.022  | 23.6 | 25.3  |
| 1.13 | 0.95 | 0     | 28 | 0  | 30   | 0 | 2209.2 | 4.7 | 210 | 5.9  | <0.012 | 24.4 | 31.5  |
|      |      | 0     | 27 | 5  | 26   | 1 | 1408.7 | 4.5 | 165 | 7.6  | 0.089  | 18.2 | 26.9  |
|      |      | 0     | 18 | 1  | 25.5 | 4 | 2599.7 | 4.2 | 198 | 5.8  | 0.461  | 28.9 | 43.7  |
| 1.43 | 0.92 | 0     | 22 | 4  | 27.5 | 0 | 1808.5 | 4   | 168 | 5.9  | 0.792  | 21.8 | 48.8  |
| 1.18 | 0.89 | 0     | 30 | 1  | 28.5 | 1 | 1740.8 | 4.4 | 177 | 5.6  | 2.004  | 25.2 | 54.8  |
| 1.09 | 0.88 | 0     | 30 | 0  | 28   | 1 | 2218   | 4.1 | 166 | 11.2 | 0.829  | 21.4 | 44.3  |
| 1.04 | 0.74 | 0     | 26 | 0  | 28.5 | 1 | 2091.9 | 4.8 | 204 | 6.1  | 0.056  | 22.3 | 21.5  |
| 1.06 | 0.73 | 0     | 20 | 0  | 29   | 0 | 1870.3 | 4.5 | 186 | 5.5  | 0.202  | 14.4 | 62.9  |
| 0.94 | 0.84 | 0     | 19 | 0  | 29   | 0 | 1881.9 | 4.3 | 190 | 5.6  | 0.015  | 21.7 | 38.1  |
| 1.01 | 0.83 | 0     | 28 | 0  | 28.5 | 0 | 1610.2 | 4.5 | 198 | 5.7  | <0.012 | 30.8 | 36.3  |
|      |      | 0     | 29 | 1  | 30   | 0 | 1788.4 | 4.3 | 206 | 5.7  | 0.11   | 24.9 | 65.2  |
| 0.98 | 0.77 | -1    | 19 | 3  | 21   | 3 | 1622.3 | 4.3 | 186 | 5.8  | 0.136  | 23.4 | 46.8  |
| 1.19 | 0.60 | 0     | 20 | 0  | 23.5 | 3 | 1663.6 | 4.3 | 259 | 6    | 0.232  | 22.7 | 24    |
| 0.99 | 0.76 | 0     | 19 | 28 | 27   | 5 | 971.28 | 4.1 | 257 | 7.4  | 0.436  | 21.8 | 32.4  |

|      |      |      |    |    |      |   |        |     |     |      |        |      |       |
|------|------|------|----|----|------|---|--------|-----|-----|------|--------|------|-------|
| 0.98 | 0.79 | 0    | 30 | 0  | 27   | 0 | 2500.6 | 4.7 | 205 | 5.7  | 0.222  | 30   | 27.8  |
| 0.87 | 0.51 | -0.5 | 27 | 1  | 30   | 0 | 2273   | 4.2 | 171 | 6.4  | 1.128  | 18.4 | 19.6  |
| 1.05 | 0.90 | 0    | 19 | 4  | 28   | 1 | 1830.5 | 4.3 | 186 | 6.2  | 0.196  | 22   | 35.3  |
| 1.14 | 0.88 | 0    | 29 | 1  | 29.5 | 0 | 2587.4 | 4.7 | 254 | 5.9  | 0.735  | 30.7 | 31.7  |
| 0.92 |      | 0    | 26 | 1  | 22.5 | 3 | 1081.9 | 4.3 | 175 | 5.6  | 0.096  | 34   | 81.9  |
| 0.98 | 0.82 | 0    | 29 | 0  | 28.5 | 0 | 2561.1 | 4.4 | 190 | 6.5  | 0.131  | 18   | 76.1  |
| 1.08 | 0.80 | 0    | 30 | 0  | 27.5 | 0 | 2070.2 | 4.5 | 209 | 6    | 0.485  | 27   | 31.2  |
| 0.93 | 0.58 | 0    | 20 | 21 | 24   | 5 | 978.6  | 5   | 142 | 7.3  | 0.022  | 11.8 | 20    |
| 0.54 | 0.37 | 0    | 26 | 0  | 26.5 | 2 | 1701.4 | 4.5 | 141 | 5    | <0.012 | 23   | 76.9  |
| 1.01 | 0.98 | 0    | 30 | 0  | 29.5 | 0 | 1509.7 | 4.3 | 187 | 5.9  | <0.012 | 31.5 | 23.9  |
| 1.16 | 0.99 | 0    | 29 | 0  | 26.5 | 3 | 1929.3 | 4.8 | 225 | 8.1  | 0.493  | 33.8 | 19.2  |
| 0.94 | 0.81 | -1   | 18 | 1  | 29   | 3 | 2071   | 4.4 | 269 | 6.5  | 0.068  | 23.4 | 42.7  |
| 0.90 | 0.85 | 0    | 28 | 0  | 29.5 | 0 | 1810.4 | 5   | 245 | 6.2  | 0.121  | 31.2 | 23.1  |
| 0.96 | 0.72 | 0    | 30 | 1  | 26   | 0 | 1300.5 | 4.8 | 225 | 6    | <0.012 | 34.4 | 24.6  |
| 1.17 | 0.86 | 0    | 19 | 0  | 28   | 1 | 1757.1 | 4.3 | 158 | 7    | 0.095  | 21.6 | 63.2  |
| 1.06 | 0.83 | 0    | 20 | 2  | 26   | 0 | 1341.3 | 4.7 | 178 | 5.7  | <0.012 | 27.6 | 32.3  |
| 1.06 | 1.01 | 0    | 29 | 0  | 28   | 0 | 1928.6 | 4.5 | 184 | 5.5  | 0.226  | 36.8 | 63.2  |
| 1.20 | 0.90 | 0    | 30 | 1  | 27   | 3 | 2120   | 4.7 | 172 | 8    | 0.065  | 33.9 | 24.1  |
| 0.83 | 0.70 | 0    | 29 | 3  | 23   | 3 | 1848.1 | 4.6 | 238 | 5.6  | 0.024  | 23.5 | 60.1  |
| 0.89 | 0.65 | 0    | 22 | 3  | 29   | 0 | 1980.2 | 4.4 | 258 | 5.8  | 0.035  | 18.9 | 41.3  |
| 0.90 | 0.95 | -1   | 29 | 3  | 28.5 | 0 | 1230.8 | 4.5 | 240 | 6.3  | 0.219  | 24.7 | 19.2  |
| 0.83 | 0.81 | 0    | 27 | 0  | 28.5 | 0 | 1702   | 4.7 | 225 | 5.7  | 0.013  | 32.8 | 31.1  |
| 1.21 | 0.71 | 0    | 29 | 0  | 29.5 | 0 | 2806.7 | 4.5 | 193 | 6.3  | 0.02   | 21.6 | 40.1  |
| 1.46 | 1.06 | 0    | 28 | 0  | 28.5 | 1 | 1657.5 | 4.2 | 154 | 11.1 | 0.536  | 21.6 | 56.6  |
| 0.85 | 0.78 | 0    | 18 | 3  | 26.5 | 1 | 1947.7 | 4.7 | 191 | 5.6  | 0.454  | 44.2 | 28.3  |
| 0.92 | 0.66 | 0    | 29 | 0  | 29   | 0 | 3439.8 | 4.6 | 250 | 6.2  | 0.053  | 16.4 | 34.5  |
| 0.96 | 0.92 | 0    | 19 | 0  | 29.5 | 0 | 1329.9 | 4.5 | 262 | 5.7  | 0.077  | 12.5 | 47.6  |
| 0.87 | 0.80 | 0    | 23 | 7  | 24.5 | 0 | 1951.6 | 4.5 | 202 | 5.7  | 0.264  | 25.3 | 40.4  |
| 0.82 | 0.66 | 0    | 20 | 1  | 29   | 1 | 1627.2 | 4.5 | 221 | 6.2  | 0.286  | 21.1 | 33.4  |
| 0.98 | 0.77 | 0    | 26 | 7  | 27   | 4 | 2486.9 | 4.6 | 193 | 8.5  | <0.012 | 30.3 | 47.7  |
| 1.07 | 0.71 | 0    | 22 | 2  | 28   | 3 | 1071   | 4.2 | 173 | 6.2  | 0.082  | 36   | 45.5  |
| 1.12 | 0.92 | 0    | 30 | 2  | 26   | 0 | 2279.7 | 4.6 | 218 | 6.2  | 0.578  | 20.9 | 41.8  |
| 1.04 | 0.65 | -24  | 12 | 15 | 18.5 | 3 | 1531.2 | 4.6 | 250 | 5.8  | 0.027  | 22.4 | 35.8  |
| 0.71 | 0.63 | 0    | 16 | 0  | 27   | 2 | 1982.1 | 4.3 | 212 | 5.5  | 0.039  | 18.5 | 46.6  |
|      |      | 0    | 24 | 4  | 24.5 | 2 | 1352.4 | 4.6 | 175 | 6    | 0.196  | 18.8 | 121.7 |
| 0.96 | 0.70 | 0    | 16 | 1  | 25   | 2 | 2050.8 | 4.6 | 163 | 5.8  | 0.067  | 26.6 | 49.9  |
| 1.22 | 0.83 | 0    | 25 | 1  | 28.5 | 0 | 2970   | 4.6 | 192 | 6.1  | 0.244  | 22.6 | 22    |
|      |      | -1   | 19 | 16 | 25.5 | 3 | 1140.8 | 4.5 | 155 | 6.2  | 0.014  | 18.3 | 45.8  |
| 1.05 | 0.76 | -2   | 21 | 1  | 23.5 | 4 | 1689   | 4.4 | 189 | 6    | 0.075  | 17.9 | 52.9  |
| 0.89 | 0.66 | 0    | 22 | 3  | 28   | 0 | 740.88 | 4.3 | 131 | 5.8  | 0.162  | 10.5 | 76.4  |
|      |      | 0    | 28 | 6  | 28.5 | 0 | 1630.7 | 4.7 | 178 | 4.9  | 0.031  | 19.8 | 27.4  |
| 1.11 | 0.78 | 0    | 24 | 1  | 28   | 2 | 1222.6 | 4.6 | 159 | 5.6  | 0.878  | 27.7 | 111.8 |
| 1.03 | 0.82 | 0    | 29 | 5  | 28.5 | 1 | 2160.4 | 4.5 | 156 | 6.2  | 1.817  | 24.2 | 20.7  |
| 1.22 | 0.92 | 0    | 20 | 0  | 28   | 0 | 1828.2 | 4.4 | 166 | 5.7  | 0.488  | 25.5 | 40.4  |
| 1.24 | 0.98 | 0    | 28 | 3  | 28.5 | 0 | 1990   | 4.6 | 240 | 5.9  | 0.15   | 23.7 | 60.9  |
| 0.99 | 1.00 | 0    | 26 | 11 | 29   | 0 | 1948.5 | 4.4 | 192 | 6.6  | 0.581  | 21.3 | 17.2  |
| 0.74 | 0.73 | 0    | 23 | 0  | 29.5 | 0 | 2221.2 | 4.8 | 158 | 6.4  | 0.183  | 21.9 | 48    |
| 0.71 | 0.65 | 0    | 29 | 0  | 25.5 | 1 | 1830.2 | 4.8 | 161 | 5.5  | 0.335  | 23.4 | 43.1  |
| 0.86 | 0.73 | 0    | 28 | 4  | 28.5 | 0 | 1548.4 | 4.5 | 245 | 6.2  | <0.012 | 29.1 | 32.2  |
| 1.05 | 0.70 | 0    | 30 | 2  | 26.5 | 1 | 1540   | 4.8 | 200 | 5.4  | <0.012 | 23.9 | 21.3  |
|      |      | 0    | 29 | 0  | 29   | 1 | 1989.5 | 4.5 | 257 | 9.6  | 0.878  | 18.4 | 50.7  |
| 1.15 | 0.71 | 0    | 15 | 2  | 24   | 2 | 1517.9 | 4.1 | 183 | 5.8  | 0.074  | 28.1 | 36.6  |
| 1.09 | 0.80 | 0    | 29 | 14 | 28   | 0 | 2051.1 | 4.7 | 213 | 5.5  | 0.021  | 24   | 43.8  |
| 0.82 | 0.83 | -1   | 27 | 2  | 26   | 0 | 1740.8 | 4.4 | 189 | 6.4  | 1.53   | 24.3 | 43.2  |
|      |      | 0    | 27 | 10 | 28.5 | 0 | 2280.7 | 4.8 | 229 | 5.6  | 0.039  | 18.6 | 44.2  |
| 1.01 | 0.76 | 0    | 27 | 7  | 29.5 | 0 | 1661.3 | 4.5 | 167 | 5.2  | 0.229  | 19.2 | 48    |
| 1.08 | 0.66 | -2.5 | 21 | 1  | 27   | 4 | 2768   | 4.5 | 192 | 6.9  | 0.112  | 23.6 | 58.4  |
| 1.06 | 0.94 | 0    | 29 | 0  | 29.5 | 0 | 2262.6 | 5   | 174 | 5.2  | 0.13   | 28.4 | 41.8  |
| 0.92 | 0.85 | 0    | 26 | 2  | 28   | 0 | 2128.5 | 4.8 | 223 | 6.2  | 0.081  | 22.9 | 28.8  |
| 0.95 | 0.79 | 0    | 28 | 15 | 27.5 | 1 | 2306   | 4.7 | 188 | 6.8  | 0.2    | 28.3 | 33    |
| 0.95 | 0.75 | 0    | 25 | 2  | 27   | 3 | 1750.2 | 4.3 | 217 | 9    | 0.165  | 23.9 | 17.5  |
|      |      | 0    | 22 | 3  | 26.5 | 0 | 2068.3 | 4.3 | 223 | 5.4  | 0.073  | 17.3 | 34.3  |
| 1.05 | 0.74 | 0    | 30 | 4  | 23.5 | 0 | 1100.9 | 4.7 | 179 | 5.8  | <0.012 | 15.3 | 42.9  |
| 0.85 | 0.86 | 0    | 29 | 16 | 26.5 | 0 | 2477.9 | 4.7 | 296 | 5.8  | 0.085  | 12.8 | 51.4  |
| 1.14 | 0.75 | 0    | 22 | 2  | 27   | 0 | 1528.6 | 4.8 | 205 | 5.9  | 0.269  | 19.5 | 29.2  |
| 0.77 | 0.75 | 0    | 28 | 1  | 26.5 | 0 | 2370   | 4.8 | 306 | 5.8  | 0.043  | 15.3 | 25    |
| 1.56 | 1.09 | 0    | 25 | 0  | 29.5 | 2 | 1732.2 | 4.2 | 210 | 5.7  | 0.06   | 28.6 | 32.8  |
|      |      | 0    | 28 | 6  | 30   | 0 | 3339.3 | 4.6 | 230 | 5.5  | 0.161  | 22.4 | 40    |
| 1.10 | 0.73 | 0    | 29 | 5  | 27   | 0 | 1518.5 | 4.8 | 230 | 5    | 0.02   | 22.7 | 45.9  |
|      |      | 0    | 25 | 0  | 29   | 0 | 1900.1 | 4.6 | 184 | 5.5  | 0.06   | 20.7 | 46.8  |
|      |      | 0    | 12 | 16 | 25   | 3 | 2182.8 | 4.5 | 135 | 5.7  | 0.873  | 16.7 | 98.4  |
| 0.99 | 1.01 | 0    | 29 | 3  | 28.5 | 0 | 1892.2 | 4.4 | 223 | 5.6  | <0.012 | 21.8 | 53.9  |



|      |      |      |    |    |      |   |        |     |     |      |        |      |       |
|------|------|------|----|----|------|---|--------|-----|-----|------|--------|------|-------|
| 1.00 | 0.73 | 0    | 30 | 2  | 29   | 0 | 2340.2 | 4.8 | 225 | 6    | 0.051  | 21.1 | 49.9  |
| 1.10 | 0.84 | 0    | 30 | 1  | 29.5 | 0 | 2702.7 | 4.7 | 240 | 6.2  | 0.763  | 14.9 | 54.2  |
| 1.21 | 0.97 | -0.5 | 30 | 15 | 26.5 | 3 | 1832.3 | 4.6 | 219 | 5.6  | 0.094  | 21.4 | 68.3  |
| 1.14 | 0.89 | 0    | 29 | 5  | 28.5 | 0 | 1589.8 | 4.8 | 216 | 5.5  | 0.127  | 16.3 | 27.8  |
| 0.74 | 0.58 | 0    | 18 | 0  | 25   | 0 | 1869.2 | 4.6 | 245 | 5.8  | 0.025  | 21.7 | 31.5  |
| 1.39 | 0.84 | 0    | 25 | 0  | 28.5 | 2 | 2231   | 4.5 | 205 | 4.9  | 0.155  | 18.2 | 98.7  |
| 0.67 | 0.66 | 0    | 23 | 0  | 26.5 | 0 | 1230.6 | 4.1 | 224 | 5.9  | <0.012 | 21   | 25    |
| 1.22 | 0.92 | 0    | 20 | 2  | 26.5 | 0 | 2442   | 4.6 | 263 | 6.6  | 0.075  | 20.8 | 39.9  |
| 1.31 | 0.72 | 0    | 27 | 2  | 29.5 | 2 | 1267.6 | 4   | 216 | 5.6  | 0.246  | 29.8 | 63.2  |
| 1.05 | 0.79 | 0    | 29 | 0  | 28   | 0 | 2227.1 | 4.7 | 204 | 5.4  | 0.08   | 21.7 | 46.7  |
| 1.04 | 0.71 | 0    | 15 | 6  | 26.5 | 0 | 1211.5 | 4.4 | 206 | 6.1  | 0.205  | 17.2 | 85    |
| 1.07 | 0.93 | 0    | 30 | 2  | 28.5 | 0 | 2177.4 | 4.4 | 219 | 5.3  | 0.031  | 22.4 | 50.3  |
| 0.86 | 0.71 | 0    | 28 | 7  | 29   | 0 | 2082   | 4.8 | 179 | 5.7  | 0.053  | 19.8 | 33.8  |
|      |      | 0    | 21 | 2  | 25   | 2 | 1412   | 4.2 | 230 | 5.5  | 0.066  | 20.3 | 52.1  |
| 1.06 | 0.92 | -1   | 26 | 2  | 27   | 0 | 1199.7 | 4.5 | 193 | 6    | 0.019  | 18.1 | 35.9  |
| 1.10 | 0.74 | 0    | 21 | 11 | 25.5 | 2 | 1561.6 | 4.7 | 221 | 5.7  | 0.049  | 24.2 | 34.7  |
| 1.07 | 0.82 | 0    | 30 | 8  | 29   | 0 | 1931.4 | 4.4 | 237 | 5.2  | 0.148  | 21.1 | 16.9  |
| 0.73 | 0.61 | 0    | 19 | 1  | 27   | 0 | 2610   | 4.6 | 189 | 5.7  | 0.217  | 26.7 | 42.7  |
| 0.82 | 0.72 | 0    | 23 | 2  | 27.5 | 0 | 1872   | 4.3 | 192 | 6    | 0.022  | 22   | 47.1  |
| 0.97 | 0.77 | 0    | 26 | 4  | 18.5 | 0 | 1758.9 | 4.4 | 198 | 6.2  | 0.19   | 24.5 | 46.8  |
| 0.98 | 0.87 | 0    | 30 | 0  | 26   | 0 | 1940.1 | 4   | 227 | 5.5  | 0.026  | 35.3 | 40.6  |
| 1.28 | 0.97 | 0    | 28 | 5  | 27   | 0 | 1620.5 | 4.6 | 221 | 5.5  | 0.277  | 13   | 78    |
| 1.05 | 0.71 | -1   | 21 | 3  | 26.5 | 2 | 1468.8 | 4.3 | 218 | 6.2  | 1.906  | 15.3 | 66    |
| 1.10 | 0.85 | 0    | 28 | 12 | 27   | 1 | 2808.5 | 4.8 | 212 | 6.8  | 0.422  | 25.6 | 40.7  |
| 1.35 | 1.14 | 0    | 30 | 1  | 29   | 1 | 1933.1 | 4.4 | 177 | 6.8  | 0.054  | 26.3 | 26.1  |
| 1.12 | 0.80 | -0.5 | 28 | 5  | 27.5 | 1 | 3132.1 | 4.6 | 218 | 7.9  | 0.064  | 26.3 | 32.6  |
| 0.87 | 0.82 | 0    | 18 | 0  | 29   | 0 | 1662   | 4.2 | 233 | 6    | 0.165  | 24.2 | 41.5  |
| 0.81 | 0.68 | 0    | 28 | 5  | 26   | 0 | 1667.7 | 4.4 | 199 | 5.6  | 0.131  | 23.8 | 45.9  |
| 0.84 | 0.70 | 0    | 26 | 4  | 24.5 | 0 | 1911.8 | 4.5 | 173 | 5    | 0.103  | 16.5 | 66.9  |
| 1.10 | 0.93 | 0    | 27 | 3  | 28.5 | 0 | 1912.3 | 4.6 | 195 | 5.8  | 0.053  | 12.4 | 39.5  |
| 1.01 | 0.83 | 0    | 29 | 0  | 26.5 | 0 | 1838   | 4.5 | 212 | 4.9  | 0.016  | 20.8 | 42.1  |
|      | 0.67 | 0    | 24 | 5  | 27.5 | 1 | 2265.7 | 4.1 | 243 | 5.9  | 0.019  | 15.4 | 85.9  |
| 1.02 | 0.92 | 0    | 29 | 0  | 28.5 | 0 | 1551.8 | 4.4 | 216 | 5.6  | 0.157  | 25.6 | 35.6  |
| 1.18 | 0.74 | 0    | 29 | 3  | 27   | 0 | 1723.7 | 4.5 | 217 | 5.5  | 0.031  | 21.3 | 32.2  |
| 1.07 | 0.86 | 0    | 30 | 0  | 26   | 0 | 1700.3 | 4.5 | 215 | 5.8  | 0.034  | 25.8 | 34.8  |
| 1.01 | 0.81 | 0    | 30 | 2  | 28   | 0 | 2288   | 4.6 | 243 | 5.4  | 0.017  | 29.1 | 32.4  |
| 0.96 | 0.78 | 0    | 26 | 0  | 28.5 | 0 | 2157.9 | 4.3 | 228 | 4.9  | 0.262  | 20.8 | 35.9  |
| 1.21 | 1.02 | 0    | 26 | 2  | 28   | 0 | 1030.3 | 4.4 | 191 | 5.9  | 0.153  | 27.5 | 25.8  |
| 1.09 | 0.85 | 0    | 26 | 0  | 28.5 | 0 | 1567   | 4.2 | 150 | 6.2  | 0.657  | 23.8 | 60    |
| 1.26 | 0.90 | 0    | 30 | 0  | 28.5 | 0 | 3012.2 | 4.7 | 170 | 5.8  | 0.025  | 32.5 | 48.3  |
| 1.02 | 0.81 | 0    | 22 | 9  | 25.5 | 1 | 1512.5 | 4.5 | 192 | 7.1  | 0.036  | 21.5 | 38.7  |
| 1.16 | 0.91 | 0    | 29 | 3  | 27.5 | 0 | 2259.4 | 4.8 | 203 | 5.6  | 0.132  | 12.9 | 19.2  |
| 0.99 | 0.59 | 0    | 27 | 6  | 24   | 2 | 1520.3 | 4.9 | 160 | 6.6  | 0.046  | 18   | 36.8  |
| 1.05 | 1.03 | 0    | 28 | 2  | 29.5 | 1 | 1770.2 | 4.6 | 238 | 7.4  | 0.063  | 20.6 | 34.1  |
| 0.78 | 0.70 | 0    | 22 | 4  | 28   | 0 | 863.1  | 3.4 | 119 | 5.1  | 2.636  | 29.9 | 40.6  |
| 1.04 | 0.81 | 0    | 21 | 0  | 27.5 | 3 | 1397.6 | 4.5 | 169 | 6.5  | 1.563  | 37.2 | 28.5  |
| 1.16 | 1.05 | 0    | 27 | 2  | 29   | 0 | 1661.7 | 4.9 | 221 | 6.2  | 0.088  | 25   | 17.5  |
| 1.01 | 0.74 | 0    | 27 | 0  | 30   | 0 | 1940.6 | 4.6 | 244 | 6    | 0.672  | 16.2 | 23.9  |
| 1.02 | 0.96 | 0    | 28 | 1  | 28   | 0 | 2203.4 | 4.3 | 180 | 6.4  | 0.038  | 23.2 | 31.3  |
| 1.09 | 0.90 | 0    | 28 | 0  | 28   | 0 | 1629   | 4.6 | 236 | 5.7  | 0.016  | 16.4 | 31    |
| 0.85 | 0.67 | 0    | 28 | 5  | 25   | 2 | 520.2  | 4.4 | 220 | 6.2  | 0.213  | 21.1 | 39.8  |
| 0.70 | 0.76 | 0    | 15 | 28 | 22   | 2 | 1722.2 | 4.5 | 212 | 5.7  | 0.146  | 31.7 | 35.6  |
| 1.01 | 0.84 | 0    | 21 | 3  | 24.5 | 0 | 1939.1 | 4.5 | 148 | 6.5  | <0.012 | 25.4 | 36.4  |
| 1.05 | 0.72 | 0    | 28 | 0  | 26   | 3 | 1170.4 | 4.3 | 150 | 6.6  | 0.042  | 18.8 | 108.8 |
| 0.82 | 0.73 | 0    | 30 | 12 | 29   | 2 | 1868.8 | 4.2 | 246 | 5.8  | 0.055  | 31   | 41.9  |
| 0.87 | 0.47 | 0    | 26 | 6  | 25.5 | 0 | 1710.8 | 4.3 | 198 | 5.7  | <0.012 | 28.4 | 32.1  |
| 0.62 | 0.48 | 0    | 18 | 19 | 19.5 | 0 | 1799.2 | 4.2 | 163 | 5.9  | 0.034  | 30.5 | 32.4  |
| 1.35 | 1.05 | 0    | 30 | 0  | 29   | 0 | 927.2  | 5   | 213 | 5.2  | 0.04   | 25   | 28.1  |
| 1.21 | 0.96 | 0    | 30 | 3  | 26.5 | 0 | 1350.3 | 4.4 | 216 | 5.9  | 0.581  | 22.1 | 43.3  |
| 1.03 | 0.84 | 0    | 27 | 7  | 26   | 0 | 2132   | 4.5 | 282 | 6.3  | 0.065  | 26.3 | 39    |
| 1.04 | 0.90 | 0    | 28 | 1  | 28.5 | 0 | 2434.7 | 4   | 234 | 6.3  | <0.012 | 25.8 | 45.4  |
| 0.97 | 0.68 | 0    | 28 | 3  | 27   | 2 | 2277.9 | 4.4 | 221 | 5.6  | <0.012 | 24.3 | 42.6  |
| 1.18 | 1.02 | 0    | 25 | 1  | 29   | 0 | 2501.3 | 4.7 | 220 | 5.9  | 0.013  | 23.4 | 13.1  |
| 1.11 | 0.73 | 0    | 28 | 2  | 28.5 | 0 | 2268.5 | 4.4 | 174 | 5.5  | 0.03   | 24.9 | 36.8  |
| 0.98 | 0.84 | 0    | 26 | 5  | 27   | 1 | 948.6  | 4.3 | 165 | 5.3  | 0.633  | 18   | 74.1  |
| 0.94 | 0.89 | 0    | 21 | 0  | 26.5 | 0 | 1349.3 | 4.6 | 188 | 5.6  | 0.042  | 28.3 | 32.3  |
| 1.01 | 1.01 | 0    | 30 | 2  | 29.5 | 0 | 2133   | 4.5 | 202 | 5.3  | 0.022  | 29.2 | 56.2  |
| 1.15 | 0.91 | 0    | 28 | 5  | 24   | 0 | 1401.2 | 4.6 | 113 | 5.5  | 0.059  | 9.7  | 57.5  |
| 1.28 | 0.97 | 0    | 27 | 0  | 28.5 | 0 | 1489.9 | 4.7 | 199 | 5.9  | 0.02   | 35.2 | 39.9  |
| 0.97 | 0.78 | -2   | 30 | 1  | 27.5 | 0 | 2002.8 | 4.4 | 210 | 5.5  | 0.457  | 22.5 | 33    |
|      |      | -2   | 16 | 15 | 27.5 | 1 | 1487.6 | 4.4 | 191 | 10.7 | 0.873  | 19.8 | 20    |
| 0.99 | 0.72 | 0    | 25 | 3  | 27.5 | 2 | 2477.6 | 4.8 | 176 | 7    | 0.199  | 24.9 | 37.1  |

|      |      |    |    |    |      |   |        |     |     |      |        |      |      |
|------|------|----|----|----|------|---|--------|-----|-----|------|--------|------|------|
| 1.49 | 0.99 | 0  | 29 | 18 | 27   | 0 | 2436.5 | 4.4 | 196 | 5.6  | 0.315  | 23.9 | 15.3 |
| 0.96 | 0.75 | 0  | 29 | 4  | 28.5 | 2 | 3422.4 | 4.5 | 157 | 4.9  | 0.018  | 16.9 | 77   |
| 1.14 | 0.95 | 0  | 27 | 3  | 28   | 0 | 2498.2 | 4.6 | 209 | 5.6  | 0.013  | 25.8 | 16.4 |
| 0.99 | 0.83 | 0  | 24 | 0  | 28.5 | 0 | 1299.2 | 4.1 | 200 | 5.9  | <0.012 | 21   | 40.4 |
| 1.05 | 0.80 | 0  | 26 | 3  | 27   | 1 | 2193   | 4.8 | 164 | 6.3  | 0.026  | 27.3 | 32.6 |
| 0.89 | 0.69 | 0  | 26 | 6  | 28   | 0 | 1481.5 | 4.7 | 185 | 5.6  | 0.192  | 19.4 | 84.6 |
| 1.26 | 1.10 | 0  | 30 | 0  | 29.5 | 0 | 2397.7 | 4.6 | 211 | 6.2  | 0.211  | 31   | 28.1 |
| 1.16 | 0.94 | 0  | 29 | 8  | 27   | 1 | 2107   | 4.4 | 160 | 6.2  | 1.5    | 31.5 | 28.5 |
| 1.16 | 0.93 | 0  | 27 | 0  | 27   | 1 | 1989.7 | 4.4 | 177 | 7.9  | 0.056  | 18.4 | 27.1 |
| 0.93 | 0.64 | 0  | 25 | 0  | 29   | 2 | 1690.1 | 4.5 | 200 | 6.1  | 0.172  | 12.6 | 57.9 |
| 0.82 | 0.71 | 0  | 23 | 3  | 22.5 | 2 | 1348.5 | 4.2 | 281 | 6.3  | 0.042  | 26.8 | 56.1 |
| 0.87 | 0.78 | 0  | 24 | 1  | 29.5 | 1 | 1308.5 | 4.4 | 137 | 8.2  | 0.015  | 27.2 | 36.9 |
| 1.02 | 0.72 | 0  | 29 | 3  | 27   | 0 | 1892.2 | 4.4 | 208 | 5.6  | 0.027  | 12   | 30.4 |
| 0.83 | 0.88 | 0  | 24 | 2  | 27   | 0 | 1638.7 | 4.4 | 268 | 5.6  | 0.025  | 14.9 | 55.5 |
| 1.25 | 0.94 | 0  | 27 | 11 | 27   | 0 | 2208.1 | 4.6 | 164 | 6.1  | 0.013  | 14   | 31.3 |
|      |      | 0  | 26 | 4  | 26.5 | 0 | 1777.4 | 4.7 | 176 | 5.8  | 0.423  | 28.3 | 27.7 |
| 1.05 | 0.76 | 0  | 24 | 1  | 26.5 | 6 | 1869.6 | 4.4 | 193 | 6.4  | 0.032  | 23.9 | 60   |
| 1.46 | 1.05 | 0  | 28 | 2  | 21.5 | 0 | 1862.1 | 4.3 | 140 | 5    | 0.056  | 39.3 | 39.2 |
|      |      | 0  | 19 | 4  | 25.5 | 0 | 1320.2 | 4.6 | 150 | 5.5  | 0.052  | 26.3 | 42.9 |
| 0.77 | 0.58 | 0  | 28 | 0  | 23   | 0 | 1190.8 | 4.6 | 203 | 5.3  | <0.012 | 14.8 | 43.5 |
|      | 1.13 | 0  | 25 | 0  | 30   | 0 | 3013.1 | 4.4 | 190 | 5.1  | 0.105  | 22.2 | 35.3 |
| 1.22 | 0.89 | 0  | 26 | 0  | 28.5 | 1 | 1501.9 | 4.6 | 179 | 6.2  | 0.014  | 26.5 | 26.2 |
| 1.26 | 0.81 | 0  | 26 | 3  | 27   | 4 | 1168.4 | 4.5 | 147 | 7.5  | 0.102  | 26.7 | 36   |
| 1.41 | 1.09 | 0  | 29 | 0  | 27   | 1 | 2332.3 | 4.3 | 191 | 10.5 | 0.972  | 19.9 | 50.9 |
| 1.21 | 0.98 | 0  | 21 | 2  | 29   | 0 | 1337.6 | 4.5 | 187 | 6    | 0.198  | 23.6 | 47.6 |
| 0.92 | 0.80 | 0  | 27 | 0  | 27   | 1 | 1960   | 4.7 | 207 | 6.6  | 0.033  | 24.4 | 25.8 |
| 0.84 | 0.75 | 0  | 30 | 1  | 27   | 0 | 2723   | 4.8 | 297 | 5.4  | 0.091  | 22   | 20.4 |
| 1.11 | 0.78 | 0  | 23 | 1  | 27   | 2 | 1957.7 | 4.4 | 238 | 5.9  | <0.012 | 25.8 | 32.6 |
| 0.94 | 0.72 | 0  | 22 | 11 | 25.5 | 2 | 1607.6 | 3.4 | 113 | 8    | 0.795  | 33.9 | 63.7 |
| 1.16 | 0.87 | 0  | 29 | 6  | 26.5 | 0 | 2378.7 | 4.6 | 197 | 6.4  | 0.03   | 26.1 | 57.6 |
| 0.92 | 0.86 | 0  | 29 | 4  | 27   | 0 | 2027.7 | 4.3 | 203 | 6.5  | 0.127  | 26.5 | 44.6 |
| 0.95 | 0.77 | 0  | 27 | 0  | 28.5 | 0 | 1548.4 | 4.5 | 265 | 6.3  | 0.995  | 19.5 | 27.1 |
| 1.06 | 0.73 | 0  | 25 | 4  | 26   | 0 | 2029.4 | 4.5 | 176 | 5.5  | 0.022  | 25   | 62.6 |
| 1.14 | 0.88 | 0  | 29 | 6  | 25.5 | 0 | 2008.8 | 4.4 | 150 | 6.6  | 0.446  | 26.7 | 73.2 |
| 0.62 | 0.63 | 0  | 23 | 3  | 25.5 | 2 | 1682.1 | 4.5 | 229 | 6.5  | 0.095  | 19.5 | 37.3 |
| 1.02 | 0.89 | 0  | 23 | 6  | 27.5 | 2 | 2923.2 | 4.5 | 231 | 6.4  | 0.014  | 19.2 | 31.1 |
| 0.90 | 0.80 | 0  | 26 | 3  | 28   | 0 | 1678.3 | 4.5 | 169 | 5.5  | 0.017  | 27.2 | 37.5 |
| 0.84 | 0.70 | -1 | 17 | 1  | 24.5 | 3 | 1340.8 | 4.3 | 181 | 6.5  | 0.034  | 17.9 | 26.5 |
| 0.76 | 0.75 | 0  | 26 | 0  | 26.5 | 1 | 1458.6 | 4.3 | 242 | 5.9  | 0.248  | 28.1 | 20.1 |
| 1.00 | 0.90 | 0  | 19 | 2  | 27   | 1 | 2118.2 | 4   | 165 | 6.5  | 0.256  | 15.4 | 77.9 |
| 1.03 | 0.95 | 0  | 28 | 7  | 24.5 | 0 | 1608   | 4.6 | 179 | 5.5  | <0.012 | 35.6 | 43.9 |
| 0.82 | 0.63 | 0  | 27 | 0  | 25   | 0 | 1951   | 4.5 | 209 | 5.5  | 0.741  | 17.8 | 36.4 |
| 0.97 | 0.86 | 0  | 21 | 7  | 28   | 0 | 1329.7 | 4.3 | 195 | 6.2  | 0.179  | 24.8 | 23.3 |
| 1.11 | 0.81 | 0  | 26 | 2  | 26.5 | 0 | 2756.5 | 4.1 | 213 | 6.4  | 0.31   | 21.6 | 35.4 |
| 1.25 | 1.00 | 0  | 20 | 7  | 26.5 | 0 | 2582.3 | 4.7 | 235 | 6    | 0.033  | 22.2 | 37.3 |
| 1.17 | 0.92 | 0  | 29 | 0  | 23.5 | 0 | 1040.6 | 4.5 | 185 | 4.8  | 0.056  | 15.8 | 60.2 |
| 1.02 | 0.95 | 0  | 30 | 0  | 29   | 0 | 2497   | 4.2 | 216 | 6    | 0.386  | 18.8 | 31.2 |
| 1.19 | 0.96 | 0  | 29 | 0  | 25   | 0 | 1777.4 | 4.5 | 201 | 5.9  | 0.015  | 21.6 | 18   |
|      |      | 0  | 24 | 0  | 27   | 2 | 1368.8 | 4.3 | 174 | 5.4  | 0.077  | 18.5 | 36.8 |
| 0.96 | 0.92 | 0  | 18 | 5  | 28.5 | 1 | 1540.4 | 3.6 | 157 | 5.6  | 0.387  | 24.3 | 25.5 |
| 0.92 | 0.76 | 0  | 20 | 11 | 25   | 1 | 2381.4 | 4.4 | 197 | 6    | 0.201  | 19   | 51.2 |
| 0.83 | 0.79 | 0  | 30 | 0  | 27.5 | 2 | 1202.4 | 4.7 | 168 | 6    | 0.068  | 21.5 | 68.5 |
| 1.33 | 1.07 | 0  | 26 | 0  | 29   | 0 | 2669.4 | 4.1 | 156 | 5.9  | 0.022  | 32.8 | 41.2 |
| 0.68 | 0.63 | 0  | 22 | 5  | 27.5 | 1 | 2707.9 | 4.6 | 209 | 6    | 0.173  | 13.6 | 20.7 |
| 1.23 | 0.90 | 0  | 27 | 9  | 27.5 | 0 | 1728.3 | 4.6 | 228 | 5.9  | 0.032  | 15.9 | 40   |
| 1.19 | 0.93 | 0  | 26 | 1  | 30   | 0 | 2102.4 | 4.1 | 147 | 5.2  | 0.079  | 30.5 | 134  |
| 0.79 | 0.83 | 0  | 23 | 14 | 24.5 | 2 | 2688.6 | 4.5 | 160 | 7.1  | <0.012 | 12.4 | 30   |
| 1.52 | 0.94 | -1 | 25 | 1  | 28.5 | 3 | 2358.5 | 4.5 | 192 | 6.6  | 0.021  | 19.4 | 17   |
| 0.77 | 0.53 | 0  | 29 | 9  | 26.5 | 0 | 1738.6 | 4.4 | 205 | 5.2  | <0.012 | 18.5 | 26.1 |
| 0.76 | 0.80 | 0  | 20 | 1  | 26   | 2 | 1009.8 | 4.4 | 166 | 5.4  | <0.012 | 24.5 | 61.3 |
| 0.87 | 0.91 | 0  | 28 | 0  | 28.5 | 0 | 2539.1 | 4.6 | 176 | 5.8  | 0.031  | 25.6 | 45.7 |
| 0.96 | 0.91 | 0  | 15 | 3  | 27   | 2 | 1621.1 | 4.2 | 202 | 6.6  | 0.265  | 12.9 | 34.9 |
| 0.96 | 0.81 | 0  | 28 | 1  | 27.5 | 0 | 1227.7 | 4.5 | 194 | 5.9  | 0.65   | 23.4 | 26.6 |
| 0.76 | 0.50 | 0  | 14 | 1  | 27   | 2 |        | 4.1 | 175 | 6.1  | 0.039  | 27.2 | 57.3 |
| 1.11 | 0.95 | 0  | 24 | 5  | 28   | 0 | 1321   | 4.2 | 170 | 6.1  | 0.022  | 22.2 | 64.5 |
| 0.79 | 0.70 | 0  | 23 | 6  | 29   | 0 | 971.73 | 3.8 | 179 | 6    | <0.012 | 11.7 | 48.2 |
| 0.83 | 0.72 | 0  | 28 | 0  | 26   | 0 | 2417.9 | 4.8 | 197 | 6.3  | 0.074  | 23.8 | 47   |
| 0.90 | 0.92 | 0  | 22 | 1  | 26   | 2 | 3413.8 | 4   | 197 | 5.5  | 0.069  | 23.1 | 29   |
| 0.88 | 0.60 | 0  | 23 | 0  | 27   | 0 | 3499.7 | 4.1 | 163 | 5.9  | 0.172  | 15.1 | 60.8 |
| 1.29 | 1.00 | 0  | 25 | 0  | 28.5 | 0 | 2378.7 | 4.5 | 159 | 5.6  | 0.215  | 32.3 | 32.8 |
| 1.34 | 1.13 | 0  | 30 | 1  | 27.5 | 1 | 1240.8 | 4.1 | 161 | 6.5  | 0.53   | 31.4 | 22.7 |
| 0.99 | 0.73 | 0  | 22 | 2  | 27.5 | 1 | 1870.3 | 4.4 | 192 | 6.3  | 0.114  | 16.7 | 43.8 |

|      |      |       |    |    |      |   |        |     |     |     |        |      |       |
|------|------|-------|----|----|------|---|--------|-----|-----|-----|--------|------|-------|
| 1.10 | 0.99 | 0     | 24 | 1  | 27.5 | 1 | 1810.4 | 4.6 | 158 | 5.3 | 0.176  | 24.2 | 21.6  |
| 1.15 | 0.70 | 0     | 29 | 0  | 26.5 | 2 | 1141.9 | 4.4 | 151 | 5   | 0.039  | 19.5 | 41.2  |
| 0.95 | 0.80 | 0     | 30 | 3  | 27   | 0 | 1428.8 | 4.4 | 219 | 5.9 | 0.029  | 8.8  | 58.8  |
| 0.98 | 0.89 | 0     | 29 | 6  | 26.5 | 0 | 1572.8 | 4.1 | 167 | 5.7 | 2.013  | 28.3 | 67.2  |
| 1.25 | 1.11 | 0     | 28 | 2  | 29   | 0 | 1391.5 | 4.2 | 248 | 6.1 | 0.299  | 33.6 | 36.4  |
| 1.17 | 0.89 | 0     | 29 | 4  | 27.5 | 3 | 1989.2 | 4.4 | 189 | 5.3 | 0.047  | 21.1 | 16.4  |
| 0.87 | 0.63 | 0     | 27 | 3  | 25   | 2 | 858.39 | 3.8 | 139 | 5.9 | 0.016  | 35   | 23.9  |
| 1.32 | 1.01 | 0     | 22 | 0  | 29.5 | 1 | 1622   | 4.2 | 239 | 7.1 | 0.014  | 27   | 28.8  |
| 1.06 | 1.04 | 0     | 18 | 2  | 26   | 1 | 2080.5 | 4.3 | 198 | 5.5 | 0.048  | 20.9 | 47.7  |
| 0.79 | 0.71 | 0     | 30 | 2  | 29   | 0 | 1539.9 | 3.6 | 143 | 5.4 | 0.034  | 38.6 | 51.9  |
| 0.68 | 0.61 | 0     | 21 | 8  | 29   | 0 | 1610.2 | 4.5 | 215 | 6   | 0.067  | 25.5 | 45.3  |
| 1.09 | 0.88 | 0     | 29 | 2  | 27   | 1 | 1577.7 | 4.4 | 193 | 7.4 | <0.012 | 26.8 | 68.3  |
| 1.12 | 0.97 | 0     | 25 | 0  | 29.5 | 0 | 2149.7 | 4.7 | 233 | 5.8 | 0.026  | 22.8 | 87    |
| 0.90 | 0.77 | 0     | 21 | 12 | 28.5 | 3 | 1778   | 4.8 | 213 | 5.6 | 0.112  | 15.1 | 50.2  |
| 1.20 | 0.97 | 0     | 29 | 1  | 27.5 | 0 | 2232.9 | 4.1 | 207 | 5.9 | 0.061  | 31.4 | 55.1  |
| 0.99 | 0.85 | 0     | 24 | 0  | 27   | 1 | 1238.4 | 4.4 | 195 | 6.1 | 0.028  | 23.8 | 37.5  |
| 0.95 | 0.76 | 0     | 20 | 0  | 27   | 0 | 2330.7 | 4.7 | 242 | 6.1 | 0.032  | 18.2 | 46.5  |
| 1.12 | 0.92 | 0     | 28 | 0  | 27.5 | 1 | 1439.6 | 4.6 | 209 | 5.6 | 0.054  | 23.3 | 59.5  |
| 0.71 | 0.68 | 0     | 22 | 3  | 24   | 0 | 1288.4 | 4.3 | 252 | 5.8 | <0.012 | 17.9 | 85.6  |
| 0.96 | 0.79 | 0     | 29 | 0  | 28   | 2 | 1904.9 | 4.5 | 149 | 5.7 | 0.979  | 23.1 | 783.5 |
| 1.02 | 0.82 | 0     | 28 | 3  | 24.5 | 1 | 1530   | 4.6 | 252 | 7   | 0.074  | 13.8 | 25.5  |
| 1.26 | 0.73 | 0     | 30 | 0  | 28.5 | 0 | 1740.5 | 4.7 | 157 | 5.7 | 0.268  | 19.9 | 69.3  |
| 0.84 | 0.70 | 0     | 27 | 0  | 29   | 0 | 2088   | 4.4 | 175 | 5.7 | 0.057  | 20.9 | 43.7  |
| 1.14 | 1.02 | 0     | 30 | 0  | 28   | 0 | 1030.6 | 4.3 | 216 | 6   | 0.108  | 12.5 | 60.2  |
| 1.03 | 0.83 | 0     | 27 | 0  | 25   | 0 | 1649.3 | 4.4 | 256 | 6   | 0.139  | 26.6 | 13.7  |
| 1.02 | 0.92 | 0     | 27 | 1  | 29   | 0 | 1461.2 | 4.4 | 183 | 6   | 0.055  | 33.9 | 54.7  |
| 0.88 | 0.93 | 0     | 22 | 4  | 26.5 | 0 | 2208   | 4.7 | 201 | 6.1 | 0.067  | 16.9 | 53.5  |
| 0.96 | 0.82 | 0     | 27 | 3  | 27   | 0 | 1620   | 4.5 | 178 | 6.4 | 0.144  | 20.2 | 50.5  |
| 1.01 | 0.81 | 0     | 29 | 8  | 28   | 1 | 1780.8 | 4.4 | 203 | 5.7 | 0.125  | 22.1 | 57    |
| 0.86 | 0.90 | 0     | 28 | 2  | 24   | 0 | 2679   | 4.2 | 123 | 5.5 | <0.012 | 32.7 | 28.1  |
| 1.22 | 1.07 | 0     | 30 | 0  | 28.5 | 0 |        | 4.7 | 156 | 5.5 | 0.02   | 27.2 | 23.1  |
| 1.07 | 0.85 | 0     | 29 | 1  | 28   | 2 | 1832.1 | 4.1 | 234 | 5.5 | 0.039  | 25.2 | 29.4  |
| 1.01 | 0.80 | 0     | 24 | 13 | 27.5 | 0 | 2476.8 | 4.5 | 196 | 6.2 | 0.027  | 23.6 | 24.3  |
| 1.15 | 0.82 | 0     | 30 | 0  | 28   | 0 | 1019.2 | 4.8 | 191 | 5   | 0.253  | 21.3 | 81    |
| 1.12 | 0.87 | 0     | 29 | 0  | 28   | 0 | 2268   | 4.4 | 138 | 6.2 | 0.324  | 27   | 18.1  |
| 1.07 | 0.78 | 0     | 26 | 0  | 27   | 2 | 1079   | 4.1 | 266 | 6.1 | 0.085  | 19.4 | 31.1  |
| 1.38 | 1.06 | 0     | 28 | 13 | 27   | 0 | 797.56 | 4.7 | 200 | 5.9 | 0.054  | 29.5 | 23.8  |
| 1.01 | 0.79 | 0     | 23 | 1  | 28   | 2 | 1637.3 | 4.3 | 184 | 5.6 | 0.144  | 30   | 30.5  |
| 0.93 | 0.66 | 0     | 29 | 1  | 23   | 2 | 1368.3 | 4.8 | 201 | 5.7 | 0.023  | 24.6 | 26.2  |
| 1.10 | 0.98 | 0     | 24 | 0  | 27.5 | 1 | 1741.7 | 4.8 | 160 | 9   | 0.221  | 30.4 | 7.7   |
| 1.11 | 0.84 | 0     | 20 | 11 | 27.5 | 1 | 1261.7 | 4.4 | 181 | 7.8 | 0.078  | 21.6 | 50.9  |
| 0.97 | 0.91 | 0     | 29 | 0  | 27.5 | 2 | 621.32 | 4   | 205 | 5.8 | <0.012 | 24   | 32.5  |
| 0.87 | 0.88 | 0     | 29 | 0  | 27   | 0 | 2582.6 | 4.4 | 173 | 6.1 | 0.331  | 23   | 33.3  |
| 0.78 | 0.73 | 0     | 20 | 35 | 23.5 | 2 | 1319.5 | 4.3 | 168 | 5.5 | 0.224  | 15.2 | 100   |
| 1.32 | 1.26 | -12.5 | 24 | 3  | 27.5 | 1 | 981.18 | 4.4 | 170 | 5.5 | 0.063  | 35   | 31.9  |
| 0.79 | 0.73 | 0     | 27 | 17 | 27   | 1 | 2207.7 | 4.3 | 139 | 5.3 | 0.08   | 26.8 | 42.8  |
| 0.91 | 0.71 | 0     | 29 | 0  | 27   | 0 | 2360.8 | 4.3 | 211 | 5.9 | <0.012 | 16.2 | 41.6  |
| 0.86 | 0.67 | 0     | 25 | 0  | 26   | 0 | 2110.7 | 4.6 | 262 | 5.6 | 0.054  | 28.4 | 14.8  |
| 1.24 | 1.01 | 0     | 30 | 12 | 28   | 0 | 1552.5 | 4.4 | 206 | 5.5 | 0.283  | 14   | 46.9  |
| 1.05 | 0.82 | 0     | 29 | 2  | 27   | 3 | 2872.8 | 4.4 | 164 | 5.6 | 0.184  | 14.5 | 79.2  |
| 0.65 | 0.68 | 0     | 27 | 0  | 26   | 2 | 1740.6 | 4.2 | 219 | 5.8 | 0.152  | 22.6 | 46.1  |
| 0.84 | 0.83 | 0     | 30 | 1  | 27   | 0 | 1699.9 | 4.5 | 198 | 6.1 | 0.26   | 30.5 | 28.2  |
| 1.16 | 1.12 | 0     | 29 | 0  | 29   | 2 | 2561.5 | 4.3 | 243 | 6.1 | 0.02   | 30.7 | 44.8  |
| 0.94 | 0.73 | -1    | 13 | 6  | 25   | 3 | 3396.6 | 4.4 | 188 | 6.1 | 1.372  | 23   | 29.2  |
| 0.96 | 0.82 | 0     | 26 | 0  | 26.5 | 0 | 2201.5 | 4.6 | 181 | 5.5 | <0.012 | 25.6 | 24.1  |
| 1.05 | 1.08 | 0     | 29 | 8  | 27.5 | 0 | 1778.6 | 4.7 | 178 | 5.3 | <0.012 | 27.9 | 48.9  |
| 0.88 | 0.85 | 0     | 30 | 2  | 29   | 2 | 3431.2 | 4.2 | 171 | 5.7 | 0.179  | 25.3 | 43.6  |
| 1.23 | 0.95 | 0     | 22 | 0  | 26.5 | 2 | 1328   | 4.2 | 167 | 6.3 | 0.174  | 29.2 | 62.7  |
| 1.22 | 1.03 | 0     | 30 | 4  | 25   | 0 | 1520   | 4.5 | 197 | 5.2 | 0.029  | 26.7 | 35.7  |
| 1.10 | 0.80 | 0     | 30 | 0  | 27   | 0 | 1921.7 | 4.5 | 165 | 5.3 | <0.012 | 27.1 | 34.8  |
| 1.05 | 0.92 | 0     | 28 | 9  | 25   | 1 | 2490   | 4.6 | 227 | 6.2 | 0.154  | 24.1 | 61.5  |
| 0.87 | 0.99 | -0.5  | 26 | 1  | 26.5 | 1 | 2300.4 | 4.5 | 172 | 6.6 | 0.573  | 24.4 | 59.7  |
| 0.89 | 0.67 | 0     | 28 | 3  | 26.5 | 0 | 1258.5 | 4.4 | 159 | 5.9 | 0.026  | 23.3 | 42.8  |
| 0.99 | 0.82 | 0     | 27 | 0  | 27   | 0 | 1770.2 | 4.7 | 209 | 5.7 | 0.016  | 22.9 | 47.5  |
| 1.16 | 0.96 | 0     | 30 | 0  | 28.5 | 8 | 1978.7 | 4.3 | 216 | 5.6 | 0.066  | 24.9 | 28.3  |
|      |      | 0     | 25 | 0  | 28.5 | 0 | 1972.3 | 4.4 | 212 | 5.9 | 0.049  | 26   | 47.8  |
| 1.29 | 1.19 | 0     | 26 | 8  | 27.5 | 0 | 1640.8 | 4.2 | 152 | 6.8 | 0.028  | 28.7 | 22.4  |
| 1.28 | 1.00 | 0     | 30 | 1  | 28.5 | 1 | 1528.9 | 4.9 | 134 | 6.6 | 0.014  | 31.7 | 20.4  |
| 1.03 | 0.92 | 0     | 23 | 0  | 29   | 0 | 1269.5 | 3.6 | 125 | 5.4 | 0.051  | 21.1 | 19    |
| 1.47 | 1.15 | 0     | 28 | 0  | 29.5 | 0 | 2580.8 | 4.7 | 161 | 6   | <0.012 | 25.5 | 52.3  |
| 0.91 | 0.75 | 0     | 28 | 8  | 23   | 3 | 2161   | 4.3 | 175 | 5.6 | 0.1    | 27   | 34.6  |
| 1.23 | 1.14 | 0     | 30 | 2  | 28.5 | 0 | 2900.2 | 4.3 | 208 | 5.5 | 0.186  | 21.3 | 33.5  |

|      |      |      |    |    |      |   |        |     |     |     |        |      |      |
|------|------|------|----|----|------|---|--------|-----|-----|-----|--------|------|------|
| 1.09 | 0.88 | 0    | 28 | 6  | 26.5 | 0 | 1960.6 | 4.3 | 203 | 5.3 | 0.055  | 16.6 | 37.3 |
| 0.71 | 0.62 | 0    | 21 | 1  | 29.5 | 0 | 1271.1 | 4   | 170 | 5.8 | <0.012 | 17.3 | 54.7 |
| 1.02 | 0.77 | 0    | 29 | 0  | 28   | 0 | 1230.1 | 4.8 | 210 | 5.7 | 0.023  | 24   | 87.1 |
| 1.06 | 0.87 | 0    | 25 | 7  | 28   | 0 | 1611   | 4.4 | 172 | 6.4 | <0.012 | 25.5 | 18.1 |
| 1.03 | 0.84 | 0    | 21 | 3  | 27   | 0 | 2458.3 | 4.5 | 147 | 6.4 | 1.424  | 38.2 | 17.8 |
| 1.24 | 0.99 | 0    | 20 | 0  | 27.5 | 0 | 3647.2 | 4.5 | 172 | 5.9 | 1.236  | 31.5 | 30.4 |
| 1.37 | 0.61 | 0    | 28 | 0  | 28.5 | 1 | 1209   | 4   | 185 | 5.4 | 0.293  | 17.8 | 33.7 |
| 1.21 | 1.06 | 0    | 27 | 0  | 28   | 3 | 1446.9 | 4.3 | 170 | 5.9 | 0.387  | 27.5 | 65.7 |
| 1.28 | 1.01 | 0    | 29 | 4  | 28.5 | 2 | 2337   | 4.4 | 174 | 7.1 | 0.059  | 13   | 48.2 |
| 1.25 | 0.90 | 0    | 28 | 0  | 26.5 | 3 | 2439.5 | 4.8 | 146 | 5.7 | 0.898  | 33.9 | 15.1 |
| 0.93 | 0.77 | 0    | 30 | 5  | 25.5 | 0 | 1590.9 | 4.7 | 164 | 6.5 | 0.146  | 31   | 34.5 |
| 1.15 | 0.66 | -2   | 24 | 10 | 26.5 | 2 | 1051.5 | 4.4 | 195 | 6   | 0.151  | 23.7 | 21.7 |
| 1.14 | 0.77 | 0    | 29 | 0  | 25   | 0 | 1441.4 | 4.2 | 192 | 6.2 | 0.028  | 22.3 | 21.1 |
| 1.09 | 0.79 | 0    | 30 | 3  | 26.5 | 4 | 1200.4 | 4.6 | 174 | 6.7 | 0.055  | 25.1 | 53.8 |
| 1.09 | 0.96 | 0    | 30 | 0  | 30   | 0 | 1446.4 | 4.4 | 177 | 5.8 | 0.038  | 29.3 | 43.5 |
| 1.12 | 0.88 | 0    | 27 | 0  | 28.5 | 0 | 1938.8 | 4.5 | 172 | 7.2 | 0.035  | 32.9 | 22.6 |
| 0.98 | 0.69 | 0    | 26 | 0  | 29   | 0 | 3003.5 | 4.4 | 247 | 6.4 | 0.15   | 22.6 | 26.4 |
| 1.00 | 0.85 | 0    | 26 | 2  | 28   | 2 | 2482.2 | 4.6 | 171 | 7.4 | 0.034  | 18.8 | 63.6 |
| 1.00 | 0.84 | 0    | 30 | 12 | 28.5 | 3 | 1290.8 | 4.2 | 198 | 5.8 | 0.027  | 26.6 | 13.1 |
| 0.72 | 0.62 | 0    | 22 | 0  | 28.5 | 2 | 1440.4 | 4.3 | 217 | 5.7 | 0.04   | 38.7 | 98.8 |
| 0.91 | 0.75 | 0    | 25 | 6  | 27.5 | 2 | 1370.6 | 4.4 | 172 | 5.5 | 0.431  | 20.6 | 55.5 |
| 0.89 | 0.74 | 0    | 19 | 1  | 26   | 3 | 1011.4 | 4.5 | 213 | 4.8 | 0.052  | 16.3 | 55.5 |
| 1.34 | 1.08 | 0    | 22 | 3  | 28.5 | 3 | 1732.3 | 4.3 | 152 | 8.5 | 0.362  | 26.5 | 28.3 |
| 1.09 | 0.82 | 0    | 29 | 8  | 28   | 0 | 2852.4 | 4.1 | 213 | 5.8 | 0.106  | 22.7 | 45.2 |
| 0.93 | 0.90 | -0.5 | 21 | 0  | 28   | 0 | 1010.1 | 4.6 | 198 | 5.8 | 0.051  | 19.3 | 56.5 |
| 1.01 | 0.75 | 0    | 30 | 0  | 29.5 | 0 | 2613.3 | 4.4 | 204 | 5.9 | 0.102  | 19.6 | 68.8 |
| 0.83 | 0.81 | 0    | 20 | 1  | 28   | 0 | 2373.3 | 4.8 | 182 | 6.7 | 0.019  | 21.8 | 22.1 |
| 0.89 | 0.81 | 0    | 21 | 7  | 24.5 | 2 | 1856.9 | 4.1 | 167 | 6.8 | 0.014  | 20.5 | 48.2 |
| 1.28 | 0.99 | 0    | 29 | 0  | 29   | 1 | 2130.1 | 4.6 | 240 | 5.7 | 0.04   | 15.5 | 72.2 |
| 0.82 | 0.69 | 0    | 28 | 0  | 25   | 2 | 1741.5 | 4.6 | 204 | 6   | <0.012 | 30.4 | 38.5 |
| 1.31 | 1.06 | 0    | 25 | 0  | 27.5 | 0 | 2050.9 | 4.4 | 156 | 6.2 | 1.477  | 34.2 | 15.6 |
| 0.79 | 0.72 | 0    | 29 | 0  | 26   | 0 | 3810.6 | 4.8 | 181 | 5.4 | 0.128  | 23.7 | 53.5 |
| 1.16 | 0.96 | 0    | 30 | 0  | 28   | 0 | 2328.3 | 4.4 | 208 | 5.8 | 0.043  | 26.7 | 37.5 |
| 1.11 | 0.97 | 0    | 30 | 0  | 28.5 | 1 | 1799.7 | 4.7 | 150 | 7.4 | 0.207  | 21.5 | 16.7 |
| 1.36 | 0.78 | 0    | 14 | 19 | 26   | 4 | 1771.6 | 4.3 | 152 | 5.6 | 0.109  | 24.7 | 48.2 |
| 0.77 | 0.69 | 0    | 29 | 0  | 27   | 3 | 760.32 | 4.2 | 141 | 5.7 | 0.074  | 25.6 | 27.6 |
| 1.06 | 0.82 | 0    | 25 | 0  | 25.5 | 0 | 1631.3 | 4.4 | 193 | 5.8 | <0.012 | 22.3 | 28.4 |
| 0.88 | 0.73 | 0    | 26 | 10 | 30   | 0 | 2381.1 | 4.2 | 205 | 5.5 | <0.012 | 25.2 | 55   |
|      |      | 0    | 28 | 2  | 28.5 | 1 | 2775.5 | 4.4 | 165 | 4.3 | 0.015  | 47.8 | 22   |
| 1.25 | 0.85 | 0    | 27 | 0  | 29.5 | 0 | 1511.2 | 4.5 | 145 | 5.4 | 0.04   | 32.4 | 49.5 |
| 0.96 | 0.84 | 0    | 28 | 0  | 26.5 | 0 | 2849.1 | 4.4 | 177 | 5.9 | 0.053  | 40.2 | 45.8 |
| 1.26 | 1.05 | 0    | 26 | 0  | 29.5 | 2 | 2697   | 4.5 | 190 | 5.7 | 0.908  | 22.7 | 52.5 |
| 1.03 | 0.79 | 0    | 20 | 0  | 29   | 0 | 1781.5 | 4.4 | 183 | 5.2 | 0.053  | 29.5 | 56.3 |
| 1.18 | 0.83 | 0    | 30 | 0  | 29.5 | 0 | 2191.6 | 4.5 | 180 | 5.5 | 0.657  | 22.7 | 45.3 |
| 1.54 | 1.10 | 0    | 27 | 0  | 29   | 4 | 1311   | 4.1 | 175 | 5.5 | 0.019  | 29.9 | 65   |
|      |      | 0    | 22 | 0  | 27   | 0 | 2229.5 | 4.3 | 167 | 5.6 | <0.012 | 32.2 | 49.6 |
| 0.86 | 0.69 | 0    | 28 | 1  | 22.5 | 2 | 1870.3 | 4.3 | 159 | 5.6 | 0.022  | 19.5 | 45   |
| 0.99 | 0.78 | 0    | 28 | 0  | 25.5 | 1 | 2727.7 | 4.4 | 191 | 7.8 | 0.158  | 17.7 | 26.4 |
| 0.84 | 0.79 | 0    | 29 | 0  | 28.5 | 0 | 1780   | 4.4 | 200 | 5.7 | 0.084  | 28.2 | 41.2 |
| 0.77 | 0.70 | 0    | 28 | 8  | 26.5 | 2 | 4155.3 | 4.4 | 155 | 5.4 | 0.506  | 26.4 | 53   |
| 1.05 | 0.89 | 0    | 30 | 0  | 28   | 0 | 2120.6 | 4.5 | 169 | 6.2 | 0.133  | 25.6 | 19.2 |
| 0.88 | 0.83 | 0    | 27 | 5  | 28.5 | 7 | 1039   | 4.5 | 162 | 5.4 | 0.013  | 28.8 | 52.2 |
| 0.77 | 0.73 | 0    | 25 | 1  | 26   | 0 | 1550   | 4.2 | 188 | 5.9 | 0.198  | 19.2 | 58.4 |
| 1.00 | 0.87 | 0    | 27 | 0  | 29   | 0 | 2801   | 4.6 | 197 | 5.8 | 0.015  | 25.4 | 15   |
| 1.16 | 1.07 | 0    | 30 | 0  | 28   | 1 | 2681.8 | 4.3 | 168 | 5.9 | 0.161  | 27.1 | 29   |
|      |      | 0    | 25 | 8  | 27   | 0 | 1378.8 | 4.5 | 209 | 5.7 | 0.026  | 24.3 | 31.4 |
| 1.23 | 0.97 | 0    | 27 | 10 | 29.5 | 3 | 1960.5 | 4.7 | 190 | 5.7 | 0.014  | 16.1 | 36.9 |
| 0.68 | 0.54 | 0    | 19 | 0  | 25   | 3 | 2147.5 | 4.5 | 200 | 6   | 0.429  | 15   | 53.7 |
| 0.92 | 0.79 | 0    | 30 | 0  | 26.5 | 2 | 3102.4 | 5   | 192 | 9.4 | 0.107  | 19.5 | 29.9 |
| 0.97 | 1.00 | 0    | 28 | 0  | 27.5 | 0 | 1699.3 | 4.7 | 168 | 5.1 | 0.29   | 38.9 | 16.1 |
| 0.92 | 0.56 | 0    | 18 | 1  | 23.5 | 3 | 1658.8 | 4.2 | 195 | 5.9 | 1.669  | 24.7 | 28.3 |
| 1.10 | 0.97 | 0    | 27 | 1  | 27.5 | 2 | 1795.5 | 4.5 | 208 | 8.3 | 0.197  | 23.4 | 31.9 |
| 1.06 | 0.84 | 0    | 25 | 10 | 25.5 | 0 | 1128.1 | 4.7 | 172 | 5.7 | 0.079  | 22.5 | 38   |
| 0.73 | 0.56 | 0    | 9  | 0  | 28   | 2 | 2501.7 | 4.4 | 136 | 6.2 | 0.019  | 30.2 | 52.6 |
| 0.85 | 0.69 | -1   | 26 | 0  | 27.5 | 3 | 1608.8 | 4.2 | 176 | 6.8 | 0.013  | 25.2 | 50.2 |
| 0.81 | 0.67 | 0    | 23 | 2  | 26.5 | 4 | 2412.6 | 4.1 | 200 | 7.7 | 0.042  | 17.1 | 25.4 |
| 1.04 | 0.84 | 0    | 21 | 0  | 28.5 | 0 | 1818.5 | 4.2 | 164 | 5.5 | 1.51   | 34.9 | 39.9 |
| 0.88 | 0.80 | 0    | 23 | 0  | 30   | 2 | 2762.8 | 4.1 | 192 | 5.8 | 0.936  | 26.1 | 22.6 |
| 1.22 | 0.93 | 0    | 27 | 0  | 25   | 1 | 1803.4 | 4.3 | 172 | 6.8 | 0.108  | 35.4 | 61.1 |
| 1.16 | 0.87 | 0    | 28 | 0  | 29.5 | 3 | 2141.1 | 4.6 | 214 | 5.7 | 0.097  | 25.8 | 47.6 |
| 0.98 | 0.83 | 0    | 25 | 9  | 29   | 2 | 2099.3 | 4.5 | 181 | 5.2 | 0.016  | 23.4 | 34.6 |
| 0.80 | 0.67 | -1   | 27 | 5  | 29   | 2 | 1200.1 | 4.2 | 169 | 6.1 | 0.033  | 16.1 | 50.4 |

|      |      |      |    |    |      |   |        |     |     |      |        |      |       |
|------|------|------|----|----|------|---|--------|-----|-----|------|--------|------|-------|
| 0.82 | 0.78 | 0    | 22 | 0  | 24.5 | 0 | 1890   | 4.3 | 177 | 6.1  | 0.015  | 21.8 | 44.3  |
| 1.17 | 0.76 | 0    | 24 | 10 | 27   | 4 | 1378.4 | 4.2 | 130 | 8.1  | 0.046  | 27.3 | 216   |
| 0.97 | 0.63 | 0    | 23 | 1  | 29   | 2 | 1822.1 | 4.3 | 165 | 6    | 0.191  | 34.2 | 52.5  |
| 0.93 | 0.90 | 0    | 27 | 0  | 26.5 | 2 | 1813.8 | 4.3 | 216 | 4.9  | 0.296  | 26.5 | 32.1  |
| 0.93 | 0.71 | 0    | 28 | 0  | 28   | 3 | 3021.7 | 4.2 | 194 | 6.1  | 0.022  | 18.5 | 60.9  |
| 0.73 | 0.67 | -1   | 22 | 6  | 26   | 5 | 1386.4 | 4   | 209 | 6    | 1.43   | 21.1 | 28.7  |
| 0.96 | 0.65 | 0    | 25 | 1  | 26   | 3 | 2128   | 4.4 | 143 | 7.4  | 0.073  | 19.5 | 114.6 |
| 1.02 | 0.86 | 0    | 18 | 2  | 28   | 0 | 2271.8 | 4.6 | 194 | 5.6  | 0.014  | 34.3 | 46.8  |
|      | 0.83 | -1.5 | 23 | 1  | 24.5 | 3 | 1597.6 | 4.4 | 170 | 5.8  | <0.012 | 22.1 | 29.1  |
| 1.01 | 0.83 | 0    | 27 | 1  | 26.5 | 2 | 2322   | 4.6 | 259 | 5.7  | 0.073  | 21.5 | 48.4  |
| 1.39 | 0.91 | 0    | 17 | 7  | 25   | 3 | 1447.4 | 4.3 | 207 | 5.6  | 0.517  | 32.5 | 35    |
| 1.22 | 1.01 | 0    | 21 | 1  | 27.5 | 1 | 1020.4 | 3.8 | 123 | 5.6  | 0.045  | 40.7 | 50.7  |
| 0.78 | 0.64 | 0    | 23 | 4  | 24   | 3 | 1518.9 | 4.5 | 140 | 5.9  | <0.012 | 28.5 | 42.9  |
| 0.84 | 0.82 | 0    | 22 | 0  | 24.5 | 2 | 2107.4 | 4.3 | 115 | 7    | 0.031  | 35.6 | 44.6  |
| 0.78 | 0.73 | 0    | 29 | 0  | 28   | 3 | 1708.2 | 4.4 | 187 | 5.9  | 0.114  | 37.9 | 44.5  |
| 0.75 | 0.61 | 0    | 22 | 0  | 26   | 2 | 1495.5 | 4.5 | 184 | 5.3  | <0.012 | 18.3 | 53.2  |
| 1.14 | 0.82 | 0    | 26 | 1  | 29   | 1 | 1489.9 | 4.2 | 206 | 5.4  | 0.031  | 24   | 67    |
| 1.00 | 0.77 | 0    | 24 | 1  | 27   | 3 | 1489.6 | 4.6 | 234 | 5.6  | 0.168  | 24.6 | 36.1  |
| 1.36 | 0.92 | 0    | 25 | 2  | 28.5 | 2 | 1869.7 | 4.2 | 170 | 5.8  | 0.015  | 31.2 | 51.2  |
| 1.16 | 0.93 | 0    | 27 | 0  | 27.5 | 2 | 2069.7 | 4.2 | 142 | 5.3  | <0.012 | 30.4 | 26.3  |
| 0.94 | 0.62 | 0    | 19 | 0  | 29   | 3 | 2186.9 | 4.3 | 125 | 5.9  | 0.134  | 47.7 | 50.6  |
| 0.84 | 0.79 | 0    | 23 | 0  | 26   | 1 | 2122.2 | 4.2 | 252 | 7    | 0.113  | 25.3 | 31.4  |
| 1.26 | 0.94 | 0    | 23 | 2  | 25   | 3 | 1512.3 | 3.9 | 180 | 5.9  | 0.317  | 32.9 | 36    |
| 0.84 | 0.63 | 0    | 19 | 8  | 25.5 | 2 | 1940.4 | 4.3 | 153 | 5.6  | 0.853  | 31.6 | 14.1  |
| 1.42 | 0.94 | 0    | 27 | 0  | 28   | 2 | 1261.4 | 4.4 | 184 | 6.1  | 0.228  | 29.5 | 30.4  |
| 0.73 | 0.67 | 0    | 20 | 4  | 30   | 1 | 1792.5 | 4.1 | 202 | 6.1  | 0.276  | 19.6 | 38.3  |
| 1.12 | 0.87 | 0    | 26 | 1  | 29   | 0 | 2178.1 | 4.4 | 239 | 6.1  | 0.061  | 34.4 | 114.5 |
| 1.17 | 0.87 | 0    | 26 | 4  | 27.5 | 2 | 1502.2 | 4.6 | 192 | 5.6  | <0.012 | 42.7 | 31.5  |
| 1.03 | 0.77 | 0    | 27 | 0  | 27.5 | 0 | 1623.2 | 4   | 173 | 5.6  | 0.028  | 27.6 | 40.7  |
| 1.47 | 1.05 | 0    | 23 | 0  | 26.5 | 4 | 1548.5 | 4.6 | 160 | 7.3  | 0.582  | 23   | 108.2 |
| 0.99 | 0.84 | 0    | 19 | 1  | 26.5 | 1 | 1650.5 | 4.6 | 240 | 6.2  | 0.412  | 17   | 37.3  |
| 1.47 | 0.92 | 0    | 27 | 8  | 28.5 | 3 | 2102.5 | 4.4 | 222 | 5.8  | 0.149  | 33.1 | 64.1  |
| 1.05 | 1.15 | 0    | 13 | 0  | 25.5 | 4 | 2153   | 3.8 | 202 | 10.9 | 0.796  | 15.6 | 43.1  |
| 1.40 | 0.95 | 0    | 26 | 2  | 28.5 | 2 | 1840   | 4.4 | 173 | 6.3  | <0.012 | 19   | 33.7  |
| 0.63 | 0.69 | 0    | 21 | 2  | 27   | 2 | 1579.2 | 4.5 | 146 | 5.8  | <0.012 | 12.1 | 34.9  |
| 0.89 | 0.71 | 0    | 28 | 0  | 27.5 | 0 | 2911.7 | 4.3 | 210 | 5.5  | 0.112  | 18.2 | 52    |
| 1.46 | 1.25 | 0    | 28 | 0  | 29.5 | 3 | 2131.9 | 4.1 | 280 | 6.1  | 0.156  | 38.4 | 38    |
| 0.94 | 0.74 | 0    | 17 | 0  | 26.5 | 1 | 1150.7 | 4.1 | 155 | 6.1  | 0.1    | 22.2 | 45.2  |
| 1.10 | 0.94 | 0    | 27 | 1  | 25.5 | 3 | 2112   | 4.3 | 182 | 5.6  | <0.012 | 23.6 | 29.4  |
| 1.01 | 1.12 | 0    | 26 | 0  | 29.5 | 1 | 1509.6 | 4.7 | 198 | 5.4  | 0.018  | 26.4 | 22.1  |
| 1.13 | 0.81 | 0    | 20 | 0  | 26   | 4 | 1978.2 | 4.5 | 152 | 7.4  | 0.021  | 21.8 | 20.9  |
| 1.05 | 0.89 | 0    | 24 | 0  | 27   | 2 | 1971.2 | 4.4 | 150 | 5.5  | 0.091  | 33.7 | 40.1  |
| 1.34 | 1.05 | 0    | 26 | 0  | 27.5 | 1 | 2832.5 | 4.1 | 196 | 5.8  | 0.624  | 27.4 | 44    |
| 0.69 | 0.64 | 0    | 23 | 7  | 25   | 2 | 981.75 | 4.4 | 213 | 5.7  | <0.012 | 24.3 | 32.4  |
| 1.15 | 0.84 | 0    | 28 | 2  | 26.5 | 2 | 2711.5 | 4.8 | 190 | 6.7  | 0.089  | 18.3 | 5.8   |
| 0.86 | 0.78 | 0    | 20 | 0  | 29.5 | 1 | 1712.1 | 4.2 | 190 | 5.9  | 0.146  | 23.5 | 46.7  |
| 1.14 | 1.12 | 0    | 27 | 0  | 29.5 | 1 | 2371.6 | 4.6 | 216 | 6.2  | 0.035  | 19.4 | 49.2  |
| 0.86 | 0.65 | 0    | 22 | 0  | 24.5 | 4 | 2467.5 | 4.9 | 153 | 6    | 0.388  | 25.6 | 52.3  |
| 1.09 | 0.87 | 0    | 30 | 0  | 28.5 | 0 | 2756.6 | 4   | 179 | 6.9  | 0.076  | 17.1 | 58.1  |
| 1.34 | 0.97 | 0    | 26 | 10 | 26.5 | 3 | 942.48 | 4.3 | 188 | 6    | 0.095  | 19   | 54.2  |
| 0.89 | 0.72 | 0    | 26 | 0  | 25.5 | 3 | 1498.2 | 4.5 | 201 | 4.2  | <0.012 | 19.6 | 47.7  |
| 0.83 | 0.70 | 0    | 10 | 0  | 26.5 | 0 | 2376.3 | 4.5 | 205 | 6    | 0.033  | 15.7 | 72.6  |
| 0.74 | 0.64 | 0    | 26 | 0  | 27.5 | 0 | 1729.4 | 4.6 | 171 | 6.1  | 0.237  | 14.7 | 29    |
| 0.70 | 0.56 | 0    | 23 | 2  | 27.5 | 0 | 2999.5 | 4.5 | 159 | 6.3  | 0.04   | 23.1 | 48.8  |
| 1.83 | 0.88 | 0    | 29 | 0  | 28   | 1 | 1551.8 | 4.5 | 195 | 6.2  | 0.178  | 17.1 | 44.7  |
| 1.29 | 0.93 | 0    | 30 | 0  | 29.5 | 0 | 1918.9 | 4.5 | 191 | 5.9  | 0.156  | 25   | 37.2  |
| 1.69 | 0.91 | 0    | 28 | 1  | 28   | 4 | 1762.5 | 4.3 | 251 | 7.5  | 0.093  | 24.3 | 32.9  |
| 1.10 | 0.92 | 0    | 22 | 1  | 27   | 3 | 3328.4 | 4.4 | 152 | 6.8  | 0.459  | 31.9 | 36.1  |
| 1.13 | 0.91 | 0    | 19 | 0  | 28   | 2 | 1859.6 | 4.8 | 234 | 6    | 0.233  | 18.7 | 27.2  |
| 0.90 | 0.89 | 0    | 30 | 1  | 28.5 | 1 | 1988.5 | 4.7 | 174 | 5.9  | 2.005  | 16.3 | 46    |
| 0.92 | 0.87 | 0    | 20 | 0  | 28   | 0 | 1729.7 | 4.6 | 202 | 6.5  | <0.012 | 18.1 | 54    |
| 1.18 | 0.96 | 0    | 21 | 2  | 27.5 | 0 | 1862.5 | 4.9 | 209 | 5.6  | 0.916  | 23.1 | 30.8  |
| 1.33 | 0.81 | 0    | 12 | 1  | 26.5 | 2 | 1691.6 | 4.4 | 155 | 5.7  | 2.514  | 22.1 | 23.9  |
| 1.08 | 0.76 | 0    | 24 | 2  | 24   | 3 | 1030.4 | 4.7 | 180 | 6    | <0.012 | 25.8 | 44.6  |
| 0.83 | 0.77 | 0    | 26 | 0  | 28.5 | 3 | 2430.8 | 4.6 | 158 | 6.9  | 0.258  | 27.1 | 64.8  |
| 1.18 | 0.63 | 0    | 28 | 1  | 27   | 3 | 1642.5 | 4.2 | 174 | 6.2  | 0.131  | 27   | 61.1  |
| 1.13 | 0.77 | 0    | 25 | 4  | 28   | 1 | 2736.4 | 4.4 | 178 | 6.4  | 0.126  | 19   | 41.1  |
| 1.03 | 0.93 | 0    | 20 | 2  | 26   | 0 | 1132.2 | 4.1 | 171 | 6    | <0.012 | 19.5 | 59    |
| 0.84 | 0.78 | 0    | 20 | 0  | 27.5 | 2 | 1778.5 | 4.6 | 228 | 8.3  | 0.075  | 21.2 | 26.2  |
| 0.96 | 0.70 | 0    | 16 | 2  | 29   | 3 | 2395.4 | 4.7 | 314 | 6.1  | 0.592  | 20.2 | 32.9  |
| 1.20 | 0.92 | 0    | 28 | 0  | 29.5 | 0 | 1481   | 4.6 | 187 | 5.2  | 0.244  | 30.3 | 39.9  |
| 0.93 | 0.74 | 0    | 22 | 2  | 28   | 2 | 2647.4 | 4.5 | 200 | 6    | 0.028  | 26.2 | 28.2  |

|      |      |      |    |    |      |   |        |     |     |      |        |      |       |
|------|------|------|----|----|------|---|--------|-----|-----|------|--------|------|-------|
| 0.71 | 0.94 | 0    | 27 | 0  | 27.5 | 1 | 1539.8 | 4.4 | 202 | 5.7  | 0.025  | 25.4 | 30.2  |
| 0.68 | 0.56 | 0    | 22 | 4  | 24   | 4 | 1669.6 | 4.6 | 166 | 5.6  | 0.118  | 23.8 | 38.7  |
|      |      | -1.5 | 14 | 9  | 23.5 | 3 | 3659.8 | 4.3 | 162 | 8.1  | 1.16   | 17.3 | 23.9  |
| 0.85 | 0.55 | 0    | 26 | 1  | 24.5 | 0 | 2596.2 | 4.6 | 181 | 6.6  | 0.158  | 30.2 | 35.5  |
| 0.76 | 0.54 | 0    | 19 | 0  | 27.5 | 3 | 1722.3 | 4.3 | 166 | 5.9  | 0.033  | 20.7 | 147.7 |
| 1.13 | 0.93 | 0    | 28 | 0  | 26   | 4 | 1072.6 | 4.1 | 161 | 5.6  | 4.141  | 23.3 | 96.1  |
| 1.09 | 0.78 | 0    | 17 | 1  | 27   | 2 | 2790.9 | 4.3 | 216 | 5.5  | 0.298  | 24.4 | 34.1  |
| 0.74 | 0.63 | 0    | 26 | 0  | 24.5 | 2 | 2610   | 4.3 | 145 | 6.1  | 0.135  | 29.1 | 45.6  |
| 0.81 | 0.70 | 0    | 19 | 2  | 28   | 3 | 1519.4 | 4.5 | 221 | 6.1  | 0.034  | 15.7 | 51.2  |
| 0.92 | 0.81 | 0    | 23 | 0  | 26.5 | 4 | 1669.9 | 4.5 | 178 | 7.5  | 0.048  | 25   | 17    |
| 0.71 | 0.67 | 0    | 26 | 2  | 24   | 1 | 2032.3 | 4.5 | 217 | 5.8  | 0.136  | 17.4 | 36.5  |
| 0.92 | 0.70 | 0    | 25 | 0  | 27.5 | 0 | 1720.2 | 4.2 | 200 | 5.6  | 0.237  | 24.3 | 93.6  |
| 1.27 | 1.14 | 0    | 28 | 1  | 28   | 5 | 2660.7 | 4.2 | 185 | 11.5 | 0.24   | 23.5 | 57    |
| 0.92 | 0.74 | 0    | 27 | 0  | 28.5 | 3 | 1321.6 | 4.5 | 166 | 5.6  | 0.836  | 22.1 | 18.4  |
| 1.27 | 0.79 | 0    | 24 | 6  | 27.5 | 4 | 1701.9 | 4.4 | 247 | 6.1  | 0.106  | 20.4 | 59.2  |
| 1.01 | 0.81 | 0    | 24 | 1  | 26.5 | 3 | 3203.9 | 4.3 | 173 | 7.1  | 0.026  | 23.5 | 39.8  |
| 0.97 | 0.72 | 0    | 28 | 15 | 24.5 | 2 | 3340.5 | 4.6 | 163 | 5.1  | 0.018  | 24.4 | 16.8  |
| 1.34 | 1.11 | 0    | 26 | 0  | 29.5 | 2 | 1687.1 | 4.7 | 240 | 5.5  | 0.103  | 56.8 | 23.6  |
| 0.97 | 0.74 | 0    | 20 | 1  | 27   | 3 | 1217.2 | 4.5 | 223 | 6.6  | 0.076  | 27.5 | 49.9  |
| 0.86 | 0.73 | 0    | 28 | 0  | 27.5 | 1 | 2012.8 | 4.7 | 172 | 7.2  | 0.284  | 29.4 | 30    |
| 0.94 | 0.87 | 0    | 25 | 0  | 27.5 | 0 | 1549   | 4.8 | 206 | 5.7  | 0.019  | 26.9 | 70    |
| 1.16 | 0.72 | 0    | 28 | 0  | 29.5 | 3 | 2543.7 | 4.2 | 138 | 5.6  | 0.837  | 34.2 | 24.1  |
|      | 0.62 | -3.5 | 16 | 8  | 26.5 | 2 | 789.94 | 4.4 | 170 | 5.6  | 0.025  | 41.5 | 45.9  |
| 0.92 | 0.85 | 0    | 20 | 0  | 28.5 | 2 | 1837.5 | 4.5 | 232 | 6.1  | <0.012 | 23.6 | 51.7  |
| 0.80 | 0.57 | 0    | 24 | 1  | 25   | 2 | 1500.2 | 4.4 | 224 | 5.4  | <0.012 | 24.6 | 27.3  |
| 0.81 | 0.71 | 0    | 20 | 0  | 22   | 4 | 2543.8 | 4.5 | 224 | 8.7  | 0.114  | 29.9 | 28.3  |
| 0.73 | 0.65 | 0    | 20 | 1  | 27   | 4 | 2361.6 | 4.5 | 135 | 7.3  | <0.012 | 30.4 | 36.3  |
| 1.08 | 0.89 | -10  | 23 | 16 | 21.5 | 3 | 2002.2 | 4.5 | 193 | 6.9  | 0.507  | 15   | 31.8  |
| 1.20 | 0.90 | 0    | 19 | 3  | 26.5 | 4 | 1380.3 | 4.9 | 140 | 6    | <0.012 | 27.8 | 57.2  |
| 0.65 | 0.60 | 0    | 27 | 1  | 27.5 | 1 | 1550.1 | 4   | 197 | 5.7  | 0.096  | 13.6 | 54.9  |
| 1.02 | 0.97 | 0    | 22 | 1  | 25   | 1 | 1320.2 | 4.4 | 194 | 5.3  | 0.167  | 24.7 | 41    |
|      |      | 0    | 23 | 0  | 29.5 | 3 | 1640.8 | 4.6 | 189 | 5.7  | 0.065  | 21.5 | 34.8  |
| 1.03 | 0.63 | 0    | 19 | 1  | 27.5 | 3 | 1978   | 4.5 | 145 | 7.9  | 0.109  | 22.2 | 38.6  |
| 0.94 | 0.71 | 0    | 21 | 0  | 28   | 2 | 2167.6 | 4.3 | 215 | 5.6  | 0.04   | 14.3 | 83.6  |
| 0.78 | 0.66 | 0    | 20 | 1  | 28   | 2 | 981.55 | 4.5 | 218 | 4.9  | 0.054  | 25.5 | 47.3  |
| 1.01 | 0.91 | 0    | 25 | 0  | 27.5 | 2 | 3333.3 | 4.3 | 180 | 5.8  | 0.084  | 23.1 | 18.9  |
|      |      | 0    | 16 | 0  | 28.5 | 2 | 3261.9 | 4.3 | 184 | 6.4  | 0.333  | 27.3 | 30.8  |
|      | 0.64 | 0    | 29 | 1  | 28   | 0 | 1070.5 | 4.1 | 167 | 5.9  | 0.07   | 9.9  | 60.5  |
| 0.95 | 0.77 | 0    | 28 | 1  | 27   | 1 | 1641.5 | 4.6 | 210 | 6.1  | 0.072  | 33.5 | 19.9  |
| 0.90 | 0.74 | 0    | 27 | 1  | 28   | 0 | 1650.2 | 4.5 | 254 | 6.2  | 0.023  | 19.4 | 36.7  |
| 0.65 | 0.56 | 0    | 14 | 2  | 27.5 | 2 | 2218.6 | 4.7 | 172 | 6.1  | 0.595  | 21.6 | 40    |
| 0.78 | 0.46 | 0    | 23 | 2  | 29.5 | 2 | 2321.3 | 4.4 | 188 | 5.9  | 0.129  | 15.1 | 107.7 |
| 0.93 | 0.92 | 0    | 22 | 2  | 29.5 | 2 | 1439.2 | 4.3 | 188 | 6.2  | 0.07   | 32.9 | 34.1  |
| 1.08 | 0.86 | 0    | 28 | 0  | 29.5 | 2 | 1401.3 | 4.5 | 233 | 5.9  | 0.068  | 27.4 | 24.2  |
| 0.83 | 0.60 | 0    | 23 | 0  | 26.5 | 3 | 1462.9 | 4.1 | 175 | 7    | 0.033  | 17.9 | 49.6  |
| 0.94 | 0.80 | 0    | 29 | 0  | 25.5 | 1 | 2298.2 | 5.2 | 217 | 6.4  | 0.063  | 23   | 46.7  |
|      | 0.91 | 0    | 25 | 0  | 27.5 | 2 | 1189.6 | 4.7 | 239 | 5.9  | 0.585  | 44.5 | 48    |
| 0.87 | 0.68 | 0    | 23 | 2  | 29.5 | 0 | 2607.6 | 4.7 | 196 | 5.4  | 0.051  | 20.6 | 35.2  |
| 0.83 | 0.72 | 0    | 19 | 0  | 28   | 0 | 2030.4 | 4.5 | 257 | 5.8  | 0.13   | 23.7 | 72.8  |
| 1.44 | 1.13 | 0    | 25 | 0  | 27.5 | 2 | 1480   | 4.7 | 119 | 5.6  | 0.128  | 21.4 | 52.4  |
| 0.78 | 0.61 | 0    | 24 | 0  | 28   | 2 | 838.08 | 3.2 | 142 | 4.7  | 0.749  | 12.2 | 57.7  |
| 1.06 | 0.93 | 0    | 24 | 0  | 24.5 | 0 | 968.2  | 4.4 | 209 | 4.9  | 0.028  | 30.5 | 91.5  |
| 0.85 | 0.77 | 0    | 21 | 2  | 28   | 2 | 2447.8 | 4.6 | 204 | 6    | 1.335  | 16.3 | 32.8  |
| 1.23 | 0.90 | 0    | 29 | 0  | 26.5 | 2 | 1458.9 | 4.1 | 165 | 5    | 0.046  | 29.2 | 22.1  |
| 0.75 | 0.61 | 0    | 26 | 2  | 27   | 2 | 1762.5 | 4.4 | 181 | 6.1  | 0.441  | 20.2 | 90.3  |
| 1.01 | 0.75 | -1   | 17 | 9  | 25.5 | 2 | 3469.7 | 4.4 | 176 | 7    | 0.435  | 28.4 | 52.7  |
| 0.75 | 0.69 | 0    | 26 | 2  | 24.5 | 2 | 902    | 4.3 | 207 | 5.6  | 0.031  | 23.9 | 61.5  |
| 1.14 | 0.91 | 0    | 25 | 0  | 30   | 0 | 1332   | 4.7 | 246 | 5.7  | 0.251  | 45.6 | 53.8  |
| 1.28 | 0.73 | 0    | 25 | 0  | 28.5 | 2 | 1629.7 | 4.3 | 184 | 6    | 0.102  | 31.2 | 31.8  |
| 0.70 | 0.49 | 0    | 25 | 0  | 23   | 5 | 1351.1 | 4   | 145 | 6.5  | 0.027  | 21.9 | 47.6  |
| 0.81 | 0.69 | 0    | 30 | 0  | 28   | 0 | 2751.8 | 4.2 | 228 | 5.9  | 0.146  | 22.3 | 73.7  |
| 1.11 | 1.12 | 0    | 23 | 2  | 26.5 | 2 | 2257.4 | 4.5 | 209 | 5.9  | 0.262  | 34.9 | 22.2  |
| 1.02 | 0.59 | -0.5 | 11 | 3  | 27.5 | 2 | 1642.9 | 4.5 | 233 | 6.6  | 0.149  | 18.3 | 49.7  |
| 0.86 | 0.64 | 0    | 20 | 0  | 26.5 | 2 | 2140.4 | 4.8 | 179 | 6.7  | 0.038  | 17.1 | 49.6  |
| 0.95 | 0.80 | 0    | 22 | 2  | 27   | 3 | 2331   | 4.8 | 160 | 9.2  | 0.263  | 20.9 | 43.4  |
| 0.89 | 0.75 | 0    | 21 | 0  | 28   | 1 | 3250.4 | 4.2 | 197 | 5.8  | 0.597  | 24.2 | 42    |
| 1.06 | 0.88 | 0    | 29 | 2  | 28   | 4 | 1412.2 | 4.8 | 177 | 6.5  | 0.199  | 36.6 | 34.8  |
| 0.96 | 0.78 | 0    | 26 | 1  | 28.5 | 3 | 1698.3 | 4.3 | 221 | 5.7  | 0.574  | 22.3 | 51.7  |
| 0.89 | 0.90 | 0    | 27 | 7  | 26.5 | 0 | 2957.8 | 4.4 | 226 | 5.6  | 0.147  | 19.7 | 34.5  |
| 0.78 | 0.87 | 0    | 25 | 2  | 26.5 | 3 | 1409.8 | 4.7 | 141 | 5.9  | 0.083  | 30   | 31.4  |
| 1.22 | 0.98 | 0    | 28 | 0  | 28.5 | 1 | 3004.4 | 4.5 | 210 | 5.6  | 0.29   | 19.3 | 29.2  |
| 1.11 | 0.79 | 0    | 25 | 0  | 28.5 | 3 | 1375.8 | 4.5 | 185 | 11.3 | 0.251  | 28.9 | 39.4  |

|      |      |    |    |   |      |   |        |     |     |     |        |      |       |
|------|------|----|----|---|------|---|--------|-----|-----|-----|--------|------|-------|
| 1.06 | 0.80 | 0  | 26 | 0 | 28   | 0 | 2507.4 | 4.3 | 211 | 6.4 | 0.116  | 29.1 | 27    |
| 1.03 | 0.88 | 0  | 24 | 0 | 29.5 | 0 | 2012.9 | 4.7 | 240 | 6.5 | 0.097  | 19.9 | 35.2  |
| 0.87 | 0.73 | 0  | 17 | 2 | 25.5 | 2 | 2511.6 | 4.6 | 193 | 5.9 | 0.565  | 22.4 | 20.2  |
| 0.87 | 0.74 | 0  | 20 | 0 | 27   | 0 | 2118   | 4.4 | 231 | 6.3 | 0.118  | 26.8 | 33.5  |
| 0.82 | 0.69 | 0  | 27 | 0 | 26   | 0 | 2011.3 | 4.6 | 232 | 5.7 | 0.277  | 26.1 | 38.5  |
| 0.84 | 0.79 | 0  | 25 | 0 | 28.5 | 0 | 2018.5 | 4.4 | 182 | 6.9 | 0.099  | 20   | 35.9  |
| 1.04 | 1.00 | 0  | 29 | 0 | 28.5 | 0 | 1182.2 | 4.8 | 172 | 5.9 | 1.369  | 32.3 | 30    |
| 0.94 | 0.83 | 0  | 28 | 0 | 26.5 | 2 | 1589.5 | 4.5 | 180 | 5.7 | <0.012 | 25.9 | 66.7  |
| 1.24 | 0.86 | 0  | 28 | 0 | 28   | 0 | 2470.9 | 4.4 | 218 | 6   | 0.094  | 30.7 | 31.2  |
| 0.88 | 0.80 | 0  | 19 | 1 | 29   | 0 | 1599   | 4.3 | 208 | 6.5 | 0.261  | 23.3 | 23.9  |
| 0.92 | 0.84 | 0  | 27 | 0 | 25   | 3 | 2139.1 | 4.5 | 178 | 6   | 0.229  | 17.5 | 56.7  |
| 0.90 | 0.65 | 0  | 25 | 0 | 24   | 4 | 2207.7 | 4.7 | 179 | 6.6 | 0.155  | 19.6 | 41.5  |
| 1.23 | 0.99 | 0  | 26 | 1 | 28.5 | 0 | 2951.2 | 4.3 | 220 | 5.9 | 0.028  | 21.8 | 46.6  |
| 1.47 | 0.91 | 0  | 21 | 0 | 27.5 | 2 | 6012.4 | 4.6 | 118 | 12  | 0.195  | 22.2 | 11.6  |
| 1.17 | 0.90 | 0  | 28 | 1 | 25   | 3 | 1291.2 | 4.4 | 158 | 5.8 | 0.17   | 24.4 | 40.9  |
| 0.95 | 0.89 | 0  | 28 | 2 | 27.5 | 0 | 2038.2 | 4.1 | 143 | 5.7 | 0.061  | 20.8 | 32.6  |
| 1.01 | 0.89 | 0  | 26 | 0 | 28.5 | 1 | 1901.6 | 4.2 | 280 | 7.6 | 0.095  | 21.7 | 18.1  |
| 1.17 |      | 0  | 29 | 4 | 25.5 | 2 | 1868.2 | 4.6 | 144 | 5.9 | 0.351  | 22.9 | 52.2  |
| 0.75 | 0.59 | 0  | 22 | 3 | 23.5 | 2 | 1198.9 | 4.5 | 225 | 6   | 0.046  | 20.2 | 106.2 |
| 1.08 | 0.97 | 0  | 30 | 0 | 29   | 1 | 2381   | 4.7 | 193 | 5.8 | 0.035  | 23.2 | 30.3  |
| 1.00 | 0.91 | 0  | 28 | 1 | 27.5 | 0 | 2543.2 | 4.5 | 201 | 6   | 0.12   | 17   | 34.3  |
| 0.91 | 0.75 | 0  | 20 | 0 | 26.5 | 1 | 1238.9 | 4.9 | 175 | 7.5 | 0.308  | 21.5 | 57.8  |
| 1.29 | 0.86 | 0  | 30 | 0 | 28.5 | 2 | 1721.6 | 4.1 | 156 | 6.2 | 0.082  | 21.2 | 28.7  |
| 0.80 | 0.73 | 0  | 13 | 1 | 27.5 | 4 | 939.28 | 4.7 | 155 | 5.5 | 0.024  | 22.6 | 50.3  |
| 0.99 | 0.77 | 0  | 24 | 2 | 25.5 | 2 | 3136.1 | 4.2 | 130 | 6.1 | 0.17   | 25.9 | 64.9  |
| 0.67 | 0.68 | 0  | 21 | 0 | 27   | 0 | 1029   | 4.6 | 202 | 5.6 | 0.034  | 18   | 36.3  |
| 0.81 | 0.65 | 0  | 24 | 0 | 25   | 0 | 2271.4 | 4.4 | 196 | 5.9 | 0.024  | 17.5 | 18.7  |
| 0.76 | 0.80 | 0  | 24 | 1 | 28   | 2 | 2348.5 | 4.3 | 241 | 5.7 | 0.09   | 29   | 54.2  |
| 1.22 | 1.17 | 0  | 23 | 1 | 26.5 | 4 | 700.77 | 4.4 | 156 | 6.9 | 1.232  | 30.2 | 55.3  |
| 0.91 | 0.87 | 0  | 22 | 0 | 27.5 | 0 | 1151   | 3.9 | 163 | 5.8 | 0.139  | 18.8 | 25    |
| 1.37 | 1.11 | 0  | 28 | 0 | 27   | 0 | 2110.4 | 4.5 | 208 | 5.8 | 0.074  | 28.5 | 36.1  |
| 0.65 | 0.63 | 0  | 18 | 2 | 28.5 | 2 | 1312.4 | 4.4 | 187 | 6.4 | 0.021  | 15.5 | 19.4  |
| 0.97 | 0.94 | 0  | 23 | 4 | 27.5 | 0 | 2198.9 | 4.5 | 207 | 6.3 | 0.106  | 18   | 25.1  |
| 1.04 | 0.93 | 0  | 28 | 0 | 26.5 | 1 | 2312.6 | 4.5 | 215 | 6.9 | 0.134  | 16   | 70.3  |
| 0.93 | 0.90 | 0  | 22 | 1 | 28   | 0 | 1421.3 | 4.4 | 226 | 6   | 0.152  | 19   | 50.8  |
| 0.97 | 0.83 | 0  | 23 | 0 | 26   | 1 | 2846.6 | 4.4 | 243 | 5.9 | <0.012 | 19.9 | 49.7  |
| 0.96 | 0.87 | 0  | 16 | 0 | 25.5 | 2 | 1431   | 4.2 | 200 | 6   | 0.052  | 11.9 | 89.3  |
| 1.22 | 0.91 | 0  | 26 | 2 | 30   | 1 | 1811.2 | 4   | 238 | 5.6 | 0.074  | 18.1 | 28.2  |
| 0.99 | 0.96 | 0  | 22 | 1 | 26.5 | 1 | 1983.2 | 4.4 | 152 | 5.5 | 0.256  | 27.7 | 35    |
| 0.86 | 0.85 | 0  | 21 | 0 | 26   | 1 | 908.18 | 4.2 | 155 | 5.8 | <0.012 | 28.9 | 40.9  |
| 1.09 | 0.93 | 0  | 27 | 0 | 26.5 | 2 | 3937.2 | 4.3 | 167 | 6.1 | 0.082  | 18.6 | 99.4  |
| 1.25 | 1.11 | 0  | 27 | 0 | 28   | 0 | 2613.7 | 4.4 | 191 | 5.6 | 0.206  | 26.5 | 117.9 |
| 0.89 | 0.87 | 0  | 22 | 0 | 25.5 | 1 | 1918.1 | 4.6 | 190 | 6.5 | <0.012 | 27.3 | 43.7  |
| 0.79 | 0.69 | 0  | 18 | 0 | 24.5 | 3 | 1430.5 | 4.3 | 183 | 5.8 | 0.249  | 23.9 | 72.4  |
| 0.70 | 0.47 | 0  | 24 | 1 | 26   | 3 | 1630   | 4.4 | 174 | 5.9 | 0.717  | 13.9 | 73.6  |
| 0.76 | 0.52 | 0  | 23 | 0 | 28   | 3 | 1262.3 | 4.4 | 188 | 5.7 | 0.12   | 24.9 | 48.6  |
| 0.85 | 0.80 | 0  | 26 | 0 | 30   | 1 | 1708.5 | 4.6 | 237 | 5.6 | 0.242  | 28.5 | 21.9  |
| 0.87 | 0.83 | 0  | 23 | 0 | 28   | 0 | 2158   | 4.5 | 233 | 6.5 | 0.111  | 12.3 | 55.2  |
| 1.29 | 0.98 | 0  | 24 | 1 | 27.5 | 1 | 1421.2 | 4.5 | 192 | 6.1 | 0.982  | 34.7 | 47.7  |
| 1.15 | 0.86 | 0  | 28 | 2 | 27   | 0 | 2289.8 | 4.7 | 201 | 6.5 | 0.176  | 22.9 | 46.7  |
| 1.17 | 0.90 | 0  | 28 | 0 | 26.5 | 0 | 1982.4 | 4.4 | 202 | 6.3 | 0.699  | 17.9 | 26    |
| 1.05 | 0.78 | 0  | 28 | 0 | 28   | 0 | 1550.8 | 4.5 | 204 | 5.2 | 0.333  | 29.3 | 37.1  |
| 1.12 | 0.98 | 0  | 29 | 2 | 24.5 | 0 | 2913.4 | 5   | 204 | 5.6 | 0.117  | 33.7 | 35.6  |
| 0.89 | 0.72 | 0  | 29 | 3 | 27   | 0 | 1960.4 | 5.2 | 225 | 5.7 | <0.012 | 28.7 | 32.3  |
| 1.11 | 0.96 | 0  | 26 | 1 | 28.5 | 0 | 1741.9 | 4.6 | 195 | 5.7 | 0.132  | 30.5 | 39.6  |
| 0.92 | 0.88 | 0  | 25 | 0 | 24   | 4 | 1409.2 | 4.9 | 184 | 5.2 | 0.094  | 22.6 | 31.1  |
| 0.98 | 0.73 | 0  | 26 | 0 | 27   | 3 | 1877.8 | 4.8 | 255 | 6.1 | 0.076  | 16.1 | 29.6  |
| 1.17 | 1.00 | 0  | 28 | 1 | 27   | 0 | 2182.6 | 4.6 | 181 | 5.6 | 0.251  | 28.7 | 51.4  |
| 0.81 | 0.73 | 0  | 26 | 0 | 27.5 | 2 | 1809.4 | 4.7 | 250 | 5.8 | 0.271  | 24.8 | 34.2  |
| 1.16 | 1.10 | 0  | 26 | 0 | 28.5 | 2 | 1148.6 | 4.3 | 177 | 5   | 0.037  | 29.3 | 30.5  |
| 1.18 | 0.84 | 0  | 27 | 1 | 25.5 | 1 | 1449.2 | 4.5 | 185 | 4.9 | 0.084  | 25.8 | 34    |
| 1.06 | 0.92 | 0  | 28 | 1 | 28   | 0 | 1710.5 | 4.7 | 242 | 5.5 | 0.035  | 10.2 | 34    |
| 1.06 | 0.81 | -4 | 14 | 1 | 27   | 2 | 1891.2 | 4.8 | 181 | 6.8 | <0.012 | 26.1 | 25.2  |
| 1.33 | 1.17 | 0  | 28 | 1 | 28   | 1 | 1881.3 | 4.8 | 257 | 5.5 | 0.03   | 23.8 | 22.9  |
| 1.14 | 0.92 | 0  | 28 | 2 | 27   | 1 | 1521   | 4   | 189 | 7.9 | 0.274  | 17   | 29.1  |
| 0.96 | 0.82 | 0  | 25 | 0 | 28   | 1 | 1687   | 4.3 | 123 | 6.8 | <0.012 | 29.5 | 26.5  |
| 1.01 | 0.81 | 0  | 27 | 1 | 25.5 | 1 | 1318.6 | 4.5 | 166 | 5.1 | <0.012 | 25.6 | 46.1  |
| 1.08 | 1.02 | 0  | 27 | 2 | 28   | 0 | 1988.4 | 4.6 | 198 | 6.1 | 0.085  | 27.9 | 44.8  |
| 0.77 | 0.80 | 0  | 28 | 0 | 28   | 1 | 1466.9 | 4.6 | 195 | 5.8 | 0.245  | 20.2 | 41    |
| 0.78 | 0.57 | 0  | 26 | 1 | 28   | 0 | 1319.7 | 5   | 251 | 4.9 | 0.093  | 23.3 | 35.7  |
| 0.91 | 0.84 | 0  | 29 | 0 | 27.5 | 0 | 2009.1 | 4.9 | 231 | 5.9 | 0.111  | 24   | 22.8  |
| 0.80 | 0.72 | 0  | 25 | 1 | 26   | 3 | 996.66 | 4.2 | 217 | 6.5 | 0.214  | 16   | 126   |

|      |      |      |    |    |      |   |        |     |     |      |        |      |       |
|------|------|------|----|----|------|---|--------|-----|-----|------|--------|------|-------|
| 1.47 | 0.97 | 0    | 30 | 1  | 27.5 | 0 | 3546.3 | 4.5 | 234 | 5.4  | 0.505  | 18.8 | 63.9  |
| 1.04 | 0.92 | 0    | 28 | 1  | 28   | 1 | 1869.1 | 4.5 | 222 | 5.6  | 0.054  | 19.1 | 35.5  |
| 1.11 | 0.73 | 0    | 21 | 0  | 28.5 | 3 | 2201.8 | 4.4 | 210 | 5.6  | 0.307  | 25.1 | 32.5  |
| 0.79 | 0.66 | 0    | 19 | 1  | 27   | 4 | 1721   | 4.4 | 187 | 6    | 0.342  | 17   | 55.8  |
| 1.69 | 1.16 | 0    | 27 | 1  | 29   | 1 | 1698.9 | 4.6 | 187 | 5.6  | 0.078  | 22.7 | 27.7  |
| 0.87 | 0.79 | 0    | 26 | 1  | 26   | 4 | 1611   | 4.2 | 210 | 8.7  | 0.072  | 28.5 | 52    |
| 0.97 | 0.80 | 0    | 25 | 0  | 27.5 | 2 | 2057.6 | 4.7 | 231 | 5.8  | 0.134  | 19.2 | 28.9  |
| 1.32 | 0.89 | 0    | 29 | 2  | 28   | 3 | 2216.5 | 4.5 | 205 | 6.4  | 0.042  | 19.5 | 33.3  |
| 1.09 | 0.89 | 0    | 26 | 0  | 26.5 | 2 | 3337.2 | 4.7 | 186 | 6.5  | 0.798  | 22.1 | 41.1  |
| 0.80 | 0.75 | 0    | 27 | 1  | 24.5 | 1 | 1189.8 | 4.5 | 151 | 4.5  | <0.012 | 32   | 31.2  |
| 0.75 | 0.64 | 0    | 14 | 0  | 27   | 2 | 1799.5 | 4.2 | 202 | 6.1  | 0.172  | 34.3 | 101.9 |
| 0.92 | 0.76 | 0    | 20 | 2  | 25.5 | 3 | 1560   | 4.8 | 259 | 5.4  | 0.032  | 23.7 | 47    |
| 1.19 | 1.03 | 0    | 28 | 0  | 29.5 | 0 | 1689.3 | 4.6 | 238 | 6.5  | 0.115  | 20   | 57.4  |
| 0.90 | 0.87 | 0    | 14 | 0  | 30   | 2 | 1352.8 | 4.5 | 262 | 5.6  | 0.411  | 30.6 | 50    |
| 1.15 | 0.82 | 0    | 29 | 0  | 28.5 | 1 | 1461.2 | 4.5 | 186 | 6.3  | 0.774  | 23   | 44.1  |
| 0.94 | 0.79 | 0    | 26 | 0  | 26   | 2 | 911.25 | 4.4 | 143 | 6.2  | 1.704  | 19   | 57.4  |
| 1.23 | 0.91 | 0    | 27 | 0  | 28   | 0 | 1179.1 | 4.8 | 246 | 5.5  | 0.026  | 21.6 | 26.2  |
| 0.94 | 0.87 | 0    | 23 | 3  | 28   | 0 | 2087.5 | 4.6 | 216 | 5.6  | 0.157  | 18.3 | 31.2  |
| 0.98 | 0.75 | 0    | 27 | 4  | 26.5 | 0 | 2268.5 | 4.6 | 194 | 5.6  | 0.064  | 14   | 30.9  |
| 1.37 | 1.22 | 0    | 24 | 15 | 25   | 1 | 2578.5 | 4.6 | 204 | 5.6  | 0.062  | 21.6 | 46.2  |
| 1.04 | 0.87 | 0    | 21 | 0  | 25.5 | 2 | 1949.1 | 4.2 | 161 | 5.5  | 0.692  | 11.8 | 52.1  |
| 0.82 | 0.61 | 0    | 28 | 8  | 25.5 | 1 | 1658   | 4.5 | 201 | 5.9  | 0.377  | 16.2 | 49.7  |
| 1.04 | 0.76 | 0    | 29 | 1  | 25.5 | 0 | 1229.8 | 4.6 | 220 | 6    | 0.099  | 20.3 | 54.3  |
| 1.12 | 0.93 | 0    | 28 | 0  | 29   | 1 | 1850.5 | 4.8 | 170 | 6.4  | 0.149  | 18.3 | 45.7  |
| 1.15 | 0.82 | 0    | 29 | 2  | 28.5 | 0 | 1331.6 | 4.4 | 183 | 5.2  | <0.012 | 14.6 | 39.9  |
| 0.78 | 0.58 | 0    | 29 | 3  | 24.5 | 3 | 2099.2 | 5.1 | 177 | 15.4 | 0.359  | 31.6 | 22.9  |
| 1.08 | 0.95 | 0    | 25 | 0  | 27.5 | 0 | 1737.3 | 4.5 | 240 | 6.1  | 0.09   | 14.7 | 34.3  |
| 1.24 | 0.83 | 0    | 25 | 0  | 28.5 | 0 | 979.8  | 4.3 | 210 | 5.6  | 0.046  | 20.6 | 37.1  |
| 0.93 | 0.75 | 0    | 28 | 2  | 25.5 | 0 | 2660.8 | 4.7 | 260 | 5.4  | 0.042  | 20.6 | 23.1  |
| 0.98 | 0.67 | 0    | 28 | 1  | 23.5 | 2 | 570    | 5   | 232 | 5.9  | 2.464  | 11.9 | 91.3  |
| 1.07 | 0.84 | 0    | 29 | 1  | 27.5 | 1 | 2069.4 | 4.8 | 249 | 5.8  | 0.037  | 15.5 | 53.6  |
| 0.90 | 0.75 | 0    | 27 | 0  | 29   | 2 | 1361.6 | 4.9 | 166 | 5.7  | 0.2    | 17.3 | 32.8  |
| 1.09 | 0.99 | 0    | 28 | 0  | 27   | 3 | 2477.5 | 4.6 | 213 | 6.6  | 0.41   | 16.2 | 27.5  |
| 1.01 | 0.91 | 0    | 29 | 0  | 29.5 | 1 | 2661.7 | 4.2 | 199 | 5.5  | 0.103  | 19.8 | 38.3  |
| 1.25 | 0.98 | 0    | 27 | 0  | 28   | 0 | 1787   | 4.7 | 211 | 5.9  | 0.022  | 18.1 | 56    |
| 1.16 | 1.15 | 0    | 30 | 1  | 29   | 0 | 2272   | 4.8 | 194 | 5.9  | 0.282  | 23.7 | 33.4  |
| 1.15 | 0.82 | 0    | 27 | 0  | 27   | 0 | 1640   | 4.7 | 239 | 5.6  | <0.012 | 19.4 | 34.7  |
| 1.37 | 1.08 | 0    | 26 | 0  | 27.5 | 0 | 1330.3 | 4.9 | 228 | 5.6  | <0.012 | 12.7 | 23    |
| 1.39 | 1.09 | 0    | 27 | 0  | 28   | 0 | 1628.6 | 4.5 | 275 | 5.8  | 0.07   | 26.5 | 26    |
| 0.99 | 0.76 | 0    | 27 | 0  | 26.5 | 3 | 1437.5 | 4.3 | 119 | 7.8  | <0.012 | 21.2 | 56.1  |
| 1.31 | 1.05 | 0    | 30 | 0  | 25.5 | 1 | 1561.6 | 4.7 | 167 | 5.2  | 0.285  | 23.9 | 58.3  |
| 1.00 | 1.07 | 0    | 28 | 0  | 27   | 1 | 2252.9 | 4.7 | 164 | 5.1  | 0.057  | 18.6 | 46.2  |
| 1.11 | 1.06 | 0    | 25 | 1  | 28.5 | 0 | 2799.1 | 5.1 | 255 | 5.8  | 0.049  | 19.2 | 51.4  |
| 0.98 | 0.86 | 0    | 30 | 0  | 27.5 | 0 | 2267.3 | 4.7 | 224 | 5    | <0.012 | 26.6 | 30.1  |
| 0.90 | 0.77 | 0    | 28 | 1  | 26.5 | 0 | 1639.2 | 4.7 | 184 | 5.8  | 0.07   | 13.7 | 54.1  |
| 0.80 | 0.79 | 0    | 30 | 0  | 29   | 0 | 1478.9 | 4.5 | 186 | 5.7  | <0.012 | 21.2 | 50    |
| 0.89 | 0.71 | 0    | 22 | 2  | 28   | 0 | 3299   | 4.4 | 217 | 5.8  | 0.343  | 15.4 | 61.4  |
| 1.05 | 0.84 | 0    | 29 | 0  | 27   | 0 | 2338.9 | 4.9 | 292 | 5.7  | 0.052  | 25.1 | 30.5  |
| 0.96 | 0.80 | 0    | 28 | 3  | 26.5 | 0 | 2598.8 | 4.5 | 241 | 5.5  | 0.047  | 14.3 | 29.8  |
| 0.94 | 0.85 | 0    | 18 | 2  | 27   | 1 | 2220.7 | 4.6 | 158 | 7.1  | 0.144  | 21.4 | 32.9  |
| 0.98 | 0.90 | 0    | 29 | 0  | 27.5 | 1 | 1241.7 | 4.6 | 195 | 5.9  | 0.039  | 15.9 | 47.5  |
| 0.85 | 0.72 | 0    | 19 | 0  | 27   | 0 | 1698.2 | 4.8 | 255 | 5.5  | <0.012 | 13.3 | 46.9  |
| 0.92 | 0.87 | 0    | 26 | 0  | 27.5 | 1 | 1193.6 | 4.5 | 154 | 9.3  | 0.345  | 22.5 | 47.9  |
| 1.02 | 0.94 | 0    | 27 | 0  | 29.5 | 0 | 2501.9 | 4.7 | 303 | 6.2  | 0.118  | 19   | 43.6  |
| 0.89 | 0.95 | 0    | 26 | 0  | 27   | 0 | 2237   | 4.7 | 159 | 5.6  | 0.149  | 17.8 | 59.8  |
| 0.75 | 0.68 | 0    | 26 | 0  | 27.5 | 2 | 2378.5 | 5   | 194 | 6.1  | 0.288  | 25.2 | 19.9  |
| 1.14 | 0.83 | 0    | 27 | 0  | 25.5 | 0 | 1380   | 4.5 | 222 | 5.8  | 0.074  | 22.3 | 49.1  |
| 1.06 | 0.99 | 0    | 30 | 0  | 29.5 | 0 | 1652.4 | 4.2 | 172 | 6.6  | 0.124  | 22.5 | 78.3  |
| 1.02 | 0.86 | 0    | 30 | 0  | 27   | 1 | 1829.6 | 4.8 | 182 | 6    | <0.012 | 21.5 | 42.4  |
| 1.17 | 1.07 | 0    | 30 | 0  | 24   | 0 | 1492.7 | 4.5 | 182 | 5.5  | 0.089  | 21.1 | 40.6  |
| 1.07 | 0.87 | 0    | 27 | 4  | 26.5 | 0 | 1648   | 4.7 | 217 | 5.8  | 0.286  | 11.6 | 35.1  |
| 1.09 | 0.97 | 0    | 29 | 0  | 25   | 0 | 1469.2 | 4.5 | 234 | 5.3  | 0.013  | 31.4 | 39.1  |
| 1.47 | 0.87 | -0.5 | 24 | 3  | 27.5 | 2 | 1687.8 | 4.3 | 196 | 7.1  | 0.018  | 17.9 | 35.4  |
| 1.24 | 0.94 | 0    | 28 | 0  | 26.5 | 0 | 1587.9 | 4.9 | 203 | 5.8  | <0.012 | 20.3 | 47.7  |
| 1.02 | 0.98 | 0    | 28 | 0  | 27.5 | 0 | 2332.3 | 4.5 | 183 | 5.6  | 0.014  | 22.7 | 29    |
| 0.99 | 0.73 | 0    | 27 | 0  | 27.5 | 1 | 1768.8 | 4.7 | 161 | 5.1  | 0.169  | 15.7 | 40.1  |
| 0.95 | 0.90 | 0    | 29 | 8  | 26   | 5 | 969.54 | 3.4 | 105 | 6.7  | 0.058  | 16.6 | 24.4  |
| 0.96 | 0.71 | 0    | 28 | 1  | 26.5 | 2 | 2111.7 | 4.5 | 278 | 5.7  | 0.2    | 14.3 | 91.6  |
| 0.91 | 0.89 | 0    | 30 | 0  | 28   | 2 | 1571.8 | 4.8 | 255 | 9.5  | 0.191  | 23.8 | 27.3  |
| 0.93 | 0.61 | 0    | 29 | 1  | 25.5 | 2 | 940.8  | 4.5 | 171 | 5.8  | 0.325  | 17.9 | 53.2  |
| 1.03 | 0.99 | 0    | 30 | 1  | 29.5 | 0 | 2031.3 | 4.6 | 255 | 5.7  | 0.127  | 22.8 | 34.4  |
| 0.81 | 0.71 | 0    | 27 | 0  | 26.5 | 0 | 2151.4 | 5   | 207 | 5.8  | 0.054  | 26.3 | 24    |



|      |      |      |    |    |      |   |        |     |     |     |        |      |      |
|------|------|------|----|----|------|---|--------|-----|-----|-----|--------|------|------|
| 0.76 | 0.68 | 0    | 25 | 0  | 25.5 | 2 | 2191   | 4.6 | 200 | 6.1 | 0.203  | 19.2 | 33   |
| 0.93 | 0.79 | 0    | 30 | 0  | 29   | 0 | 2475.6 | 4.4 | 195 | 5.7 | 1.164  | 18.4 | 37.8 |
| 1.09 | 0.79 | 0    | 29 | 0  | 28.5 | 0 | 1529.3 | 4.5 | 198 | 5.6 | 0.17   | 17.3 | 31.4 |
| 0.83 | 0.78 | 0    | 25 | 0  | 26   | 1 | 1990.4 | 4.6 | 240 | 6.2 | 0.02   | 24.8 | 41.9 |
| 0.98 | 0.89 | 0    | 28 | 4  | 29   | 0 | 1531.1 | 4.5 | 173 | 5.2 | 0.159  | 18.1 | 41.2 |
| 1.52 | 0.95 | 0    | 27 | 0  | 28   | 1 | 1936.3 | 4.4 | 206 | 6.8 | 0.128  | 18.7 | 16.2 |
| 1.00 | 0.97 | 0    | 28 | 0  | 28.5 | 0 | 1482   | 4.7 | 201 | 4.9 | 0.106  | 19.5 | 25.1 |
| 0.83 | 0.81 | 0    | 29 | 1  | 25   | 1 | 1770.3 | 4.3 | 139 | 5.3 | 0.086  | 15.3 | 61.7 |
| 1.11 | 0.85 | 0    | 27 | 0  | 26.5 | 0 | 1541.3 | 4.6 | 155 | 5.4 | 1.842  | 26.1 | 36.9 |
| 0.88 | 0.71 | 0    | 17 | 1  | 26.5 | 0 | 2118.3 | 4.9 | 273 | 6.7 | 0.025  | 20.8 | 23.1 |
| 1.11 | 0.92 | 0    | 19 | 14 | 28.5 | 2 | 1668.6 | 4.7 | 320 | 5.4 | 0.054  | 23.3 | 26.1 |
|      |      | 0    | 27 | 0  | 27.5 | 0 | 2272.7 | 4.5 | 192 | 5.8 | 0.027  | 15.5 | 42.1 |
| 0.82 | 0.60 | 0    | 17 | 1  | 26.5 | 2 | 1619.8 | 4.7 | 234 | 5.3 | 0.272  | 19.8 | 37.4 |
| 1.07 | 0.93 | 0    | 30 | 0  | 29   | 2 | 1288   | 4.8 | 203 | 4.4 | 0.041  | 23.7 | 38.4 |
| 0.91 | 0.69 | 0    | 26 | 0  | 26   | 3 | 1470.6 | 4.9 | 177 | 9.4 | 0.029  | 28.5 | 60.2 |
|      |      | 0    | 17 | 0  | 28   | 0 | 1658.6 | 4.6 | 178 | 6.3 | 0.082  | 18.4 | 50.1 |
| 1.14 | 0.96 | 0    | 26 | 1  | 26.5 | 1 | 1858.5 | 4.9 | 217 | 6   | 0.138  | 20.8 | 36.4 |
| 0.87 | 0.73 | 0    | 28 | 1  | 25.5 | 2 | 1428.6 | 4.4 | 206 | 5.8 | 0.021  | 10.7 | 43.8 |
| 0.98 | 0.82 | 0    | 26 | 0  | 29   | 0 | 2357.6 | 4.6 | 235 | 5.9 | 0.013  | 14.6 | 49.7 |
| 0.75 | 0.49 | 0    | 15 | 0  | 24.5 | 2 | 1681.4 | 4.3 | 175 | 4.7 | 0.705  | 39.2 | 26.4 |
| 0.83 | 0.95 | 0    | 24 | 0  | 24   | 0 | 1358.5 | 4.5 | 178 | 5.2 | 0.028  | 22.2 | 34.3 |
| 1.07 | 0.70 | 0    | 20 | 0  | 25   | 0 | 1328.5 | 4.5 | 263 | 5.8 | 0.142  | 20.7 | 15.1 |
| 0.83 | 0.70 | 0    | 19 | 1  | 29   | 3 | 1471.7 | 4.4 | 181 | 6.9 | 0.064  | 17.4 | 71.5 |
| 0.76 | 0.66 | 0    | 17 | 2  | 26   | 2 | 2670.7 | 4.6 | 178 | 7.9 | 0.039  | 22.2 | 66.9 |
| 1.02 | 0.82 | 0    | 27 | 1  | 29   | 0 | 2937.6 | 4.3 | 166 | 6.3 | 0.091  | 17.1 | 34.9 |
| 0.76 | 0.64 | 0    | 23 | 1  | 26.5 | 4 | 1711   | 4.6 | 130 | 7.5 | 1.389  | 11.3 | 48.7 |
| 1.02 | 0.84 | 0    | 19 | 2  | 27   | 4 | 2277.2 | 4.6 | 217 | 8.2 | 0.335  | 12.8 | 68.6 |
| 1.24 | 0.88 | 0    | 28 | 0  | 26   | 2 | 1658.7 | 4.1 | 213 | 6.4 | 0.15   | 16.4 | 63.8 |
| 1.09 | 0.75 | 0    | 28 | 0  | 25.5 | 0 | 1681.7 | 4.9 | 235 | 5.7 | 0.161  | 10.9 | 66.8 |
| 1.29 | 0.95 | 0    | 24 | 0  | 27   | 3 | 1820.8 | 4.8 | 138 | 6.2 | 0.314  | 29.1 | 5.8  |
| 1.13 | 1.15 | 0    | 27 | 3  | 27.5 | 1 | 3639.7 | 4.9 | 196 | 5.7 | 0.073  | 20.9 | 11.8 |
| 0.97 | 0.98 | 0    | 19 | 8  | 28.5 | 0 | 2079   | 5.1 | 166 | 6   | <0.012 | 17.7 | 46.1 |
| 1.36 | 1.17 | 0    | 29 | 0  | 29.5 | 1 | 3060.5 | 4.7 | 169 | 6.9 | 0.33   | 19.3 | 93.7 |
| 0.89 | 0.81 | 0    | 25 | 1  | 27   | 1 | 2207.5 | 5.2 | 198 | 5.6 | 0.24   | 25.6 | 55.7 |
| 0.79 | 0.63 | 0    | 24 | 4  | 24.5 | 1 | 1787.9 | 5.1 | 159 | 6.5 | 0.056  | 11.9 | 25.4 |
| 1.25 | 0.94 | 0    | 28 | 0  | 28.5 | 0 | 1691.6 | 4.3 | 200 | 5.2 | 0.043  | 20.1 | 58.5 |
| 1.18 | 0.79 | 0    | 28 | 0  | 28.5 | 1 | 1919.8 | 4.5 | 184 | 6.2 | 0.056  | 33   | 37.5 |
| 1.20 | 0.82 | 0    | 21 | 0  | 24.5 | 2 | 2497   | 4.9 | 190 | 6.1 | 0.029  | 18.7 | 62.3 |
| 0.87 | 0.79 | 0    | 24 | 1  | 24.5 | 2 | 2646.8 | 4.9 | 182 | 5.8 | 0.393  | 15.1 | 46.9 |
| 1.08 | 0.84 | 0    | 29 | 1  | 25   | 0 | 2148.3 | 4.6 | 209 | 6.1 | 0.199  | 23.7 | 35   |
| 1.07 | 1.03 | 0    | 28 | 1  | 27   | 0 | 1390.6 | 4.6 | 203 | 6.3 | 0.017  | 33.1 | 54.7 |
| 1.14 | 0.92 | 0    | 28 | 1  | 26.5 | 0 | 1011   | 4.5 | 221 | 4.7 | <0.012 | 26.1 | 45.2 |
| 1.13 | 0.90 | 0    | 17 | 0  | 25.5 | 0 | 1155.8 | 4.7 | 163 | 5.7 | 4.004  | 27.1 | 24.3 |
| 1.08 | 0.90 | 0    | 29 | 0  | 27   | 1 | 2088.9 | 4.9 | 172 | 5.8 | 0.035  | 23.2 | 42.8 |
| 1.18 | 1.02 | 0    | 27 | 1  | 27   | 1 | 2731.4 | 4.7 | 188 | 6.1 | 0.016  | 24.2 | 34.7 |
| 1.03 | 0.87 | 0    | 27 | 0  | 28   | 1 | 2028.4 | 4.3 | 182 | 5.8 | 0.164  | 22.7 | 46.8 |
| 0.77 | 0.71 | 0    | 30 | 1  | 29.5 | 1 | 1870.4 | 4.4 | 187 | 5.6 | 0.028  | 20   | 50.8 |
| 1.07 | 0.86 | 0    | 30 | 0  | 28.5 | 0 | 1581.2 | 4.4 | 211 | 5.9 | 0.066  | 17.9 | 43.5 |
| 1.13 | 0.86 | 0    | 28 | 0  | 26.5 | 2 | 4765.2 | 4.7 | 227 | 5.5 | <0.012 | 18.8 | 14.5 |
| 1.21 | 0.97 | 0    | 26 | 0  | 27.5 | 0 | 2169.1 | 4.7 | 217 | 5.8 | 0.048  | 16.3 | 71   |
| 0.76 | 0.63 | 0    | 19 | 1  | 28.5 | 0 | 1387.6 | 4.6 | 194 | 5.5 | 0.013  | 25.3 | 37.1 |
| 1.01 | 0.83 | 0    | 28 | 1  | 27   | 0 | 2221.4 | 4.8 | 221 | 5.3 | 0.014  | 22   | 46.8 |
| 1.27 | 0.95 | 0    | 24 | 0  | 30   | 0 | 1800.8 | 4.4 | 200 | 5.7 | 1.237  | 41.3 | 43.6 |
| 1.26 | 0.89 | 0    | 24 | 1  | 27   | 0 | 1620.5 | 4.5 | 162 | 6   | 0.909  | 19.5 | 87.4 |
| 0.81 | 0.79 | 0    | 20 | 1  | 27.5 | 1 | 2088.6 | 4.9 | 183 | 5.9 | 0.026  | 21.9 | 36.2 |
| 0.71 | 0.67 | 0    | 18 | 7  | 28   | 2 | 1329.3 | 4.5 | 162 | 6.8 | 0.018  | 17.7 | 50.4 |
| 1.08 | 0.84 | 0    | 20 | 1  | 25   | 0 | 2380.5 | 4.2 | 184 | 5.6 | 0.051  | 22.7 | 66   |
| 0.93 | 0.75 | -1.5 | 25 | 15 | 30   | 1 | 1629.6 | 4.8 | 209 | 6   | 0.078  | 23   | 26.6 |
| 1.02 | 1.06 | 0    | 29 | 0  | 28.5 | 1 | 2441.7 | 4.6 | 184 | 5.5 | 0.019  | 25.9 | 31.4 |
| 1.42 | 1.05 | 0    | 27 | 2  | 27   | 0 | 2630.9 | 4.3 | 223 | 6   | 0.042  | 21.2 | 25.9 |
| 1.08 | 0.98 | 0    | 26 | 2  | 26   | 0 | 1818   | 5   | 179 | 5.6 | 0.085  | 35.1 | 41.4 |
| 1.18 | 0.94 | 0    | 27 | 1  | 29   | 0 | 2367.3 | 4.5 | 205 | 6.2 | 0.023  | 21   | 26.9 |
| 1.08 | 0.90 | 0    | 30 | 0  | 29.5 | 0 | 1280.6 | 4.6 | 310 | 6.2 | <0.012 | 18   | 46.3 |
| 1.13 | 0.92 | 0    | 26 | 0  | 28   | 0 | 1509.7 | 5   | 218 | 5.6 | 0.034  | 16.8 | 34.6 |
| 1.00 | 0.87 | 0    | 28 | 0  | 28.5 | 0 | 2301.4 | 4.7 | 181 | 6.4 | 0.03   | 19.8 | 38.6 |
| 0.87 | 0.73 | 0    | 29 | 1  | 27   | 2 | 1691   | 5.2 | 234 | 5.6 | 0.087  | 24.4 | 28.6 |
| 1.01 | 0.85 | 0    | 21 | 1  | 27.5 | 0 | 2268.9 | 4.8 | 252 | 5.5 | 0.036  | 19.2 | 35.1 |
| 1.14 | 0.96 | 0    | 27 | 0  | 29.5 | 0 | 2342.3 | 4.6 | 233 | 6.1 | 0.174  | 22.8 | 65   |
| 0.76 | 0.66 | 0    | 15 | 0  | 27.5 | 0 | 2369.4 | 4.9 | 230 | 5.8 | 0.075  | 15.9 | 52.6 |
| 1.00 | 0.93 | 0    | 26 | 1  | 26   | 1 | 2528.6 | 5.1 | 145 | 6.6 | 0.013  | 26.8 | 23.1 |
| 1.03 | 0.83 | 0    | 26 | 0  | 28   | 0 | 2137.4 | 4.7 | 188 | 5.6 | 0.031  | 25.3 | 18.8 |
| 0.86 | 0.74 | 0    | 25 | 4  | 26   | 0 | 2268   | 5   | 205 | 5.9 | 0.043  | 19.7 | 65.5 |

|      |      |    |    |   |      |   |        |     |     |      |        |      |       |
|------|------|----|----|---|------|---|--------|-----|-----|------|--------|------|-------|
| 0.91 | 0.79 | 0  | 18 | 2 | 29.5 | 0 | 2799.1 | 4.8 | 215 | 5.8  | 0.086  | 19.3 | 32    |
| 1.20 | 1.08 | 0  | 27 | 0 | 27.5 | 0 | 3768   | 4.9 | 242 | 6.2  | 0.04   | 21.4 | 34.2  |
| 1.14 | 0.90 | 0  | 30 | 1 | 30   | 0 | 2152.2 | 4.6 | 239 | 5.6  | <0.012 | 15.6 | 20.6  |
| 0.75 | 0.63 | 0  | 30 | 1 | 26   | 0 | 2409.8 | 4.5 | 151 | 5.6  | 0.127  | 24.1 | 200.6 |
| 1.00 | 1.00 | 0  | 29 | 1 | 27.5 | 1 | 1942.2 | 4.6 | 173 | 6.6  | 0.511  | 24.1 | 37.9  |
| 0.99 | 0.93 | 0  | 23 | 1 | 29.5 | 0 | 2600.5 | 4.7 | 242 | 5.4  | 0.094  | 28.6 | 34    |
| 1.05 | 0.94 | 0  | 30 | 0 | 27.5 | 0 | 2668.5 | 4.7 | 278 | 6.4  | 0.032  | 23.3 | 26.2  |
| 0.97 | 1.04 | 0  | 27 | 1 | 27   | 2 | 2177.1 | 4.8 | 212 | 5.7  | 0.106  | 43.9 | 32.7  |
| 1.05 | 0.95 | 0  | 30 | 0 | 28.5 | 1 | 1690.4 | 4.6 | 163 | 6.8  | 0.087  | 20.6 | 34.9  |
| 0.78 | 0.60 | 0  | 18 | 2 | 27   | 2 | 1469.6 | 4.2 | 245 | 6.4  | 0.038  | 15.9 | 117.4 |
| 1.07 | 0.92 | 0  | 26 | 0 | 28.5 | 0 | 1931.9 | 4.4 | 209 | 5.4  | 0.082  | 15.1 | 36.9  |
|      | 0.88 | 0  | 22 | 0 | 27   | 2 | 1998   | 4.4 | 231 | 6    | 0.033  | 23.1 | 45.6  |
| 0.78 | 0.72 | 0  | 14 | 0 | 27   | 3 | 1850.7 | 4.3 | 208 | 10.5 | 0.16   | 14.2 | 55.5  |
| 1.06 | 1.05 | 0  | 26 | 2 | 29.5 | 0 | 1830.6 | 4.9 | 292 | 6    | 0.083  | 16.4 | 48.6  |
| 0.77 | 0.65 | 0  | 28 | 1 | 27.5 | 0 | 1717.2 | 4.8 | 175 | 5.8  | 0.105  | 12.8 | 28.3  |
| 1.09 | 0.81 | 0  | 30 | 0 | 29.5 | 0 | 2248   | 4.8 | 196 | 6    | 0.107  | 23.5 | 30.8  |
| 1.07 | 0.97 | 0  | 29 | 0 | 28.5 | 0 | 2489.8 | 4.5 | 242 | 5.6  | 0.018  | 22.6 | 46.7  |
| 1.06 | 0.85 | -1 | 28 | 0 | 28.5 | 0 | 1541   | 4.8 | 226 | 5.5  | 0.046  | 15.9 | 71.3  |
| 1.19 | 1.13 | 0  | 28 | 0 | 29   | 0 | 1798.2 | 4.5 | 192 | 5.2  | <0.012 | 15   | 46.9  |
| 1.17 | 0.86 | 0  | 28 | 2 | 27   | 0 | 1159.6 | 4.6 | 203 | 5.9  | 0.063  | 16.2 | 23.7  |
| 0.94 | 0.73 | 0  | 27 | 0 | 27   | 0 | 1770.1 | 4.5 | 190 | 5.3  | 1.154  | 21.9 | 48.4  |
| 0.73 | 0.70 | 0  | 22 | 1 | 24   | 3 | 1708.6 | 4.4 | 197 | 7.6  | 0.405  | 25.7 | 45.6  |
| 1.11 | 1.15 | 0  | 26 | 0 | 28.5 | 1 | 1968.6 | 4.3 | 169 | 6.9  | 0.185  | 9.5  | 82    |
| 0.89 | 0.81 | 0  | 25 | 4 | 29   | 0 | 2030.8 | 4.6 | 214 | 6.2  | 0.044  | 19.3 | 41.5  |
| 0.89 | 0.81 | 0  | 20 | 0 | 26   | 2 | 1638.2 | 4.4 | 220 | 5.8  | 0.102  | 17.9 | 44.7  |
| 0.93 | 0.63 | 0  | 24 | 0 | 27   | 3 | 1550.9 | 4.7 | 167 | 7.1  | 0.029  | 27.2 | 25.1  |
| 0.99 | 0.75 | 0  | 25 | 1 | 27   | 0 | 2450.2 | 5   | 230 | 6.2  | 0.336  | 14.7 | 41.3  |
| 0.99 | 0.83 | 0  | 28 | 2 | 25   | 4 | 1631.5 | 4.5 | 269 | 5.8  | <0.012 | 17.4 | 25.8  |
| 1.03 | 0.87 | 0  | 30 | 6 | 27.5 | 0 | 1590.5 | 4.8 | 181 | 5.9  | 0.374  | 22.4 | 35.4  |
| 0.91 | 0.70 | 0  | 28 | 4 | 26   | 2 | 1598.3 | 4.8 | 240 | 5.7  | 0.04   | 21.8 | 28.9  |
|      |      | 0  | 30 | 0 | 27.5 | 0 | 2111.2 | 4.5 | 213 | 6    | 0.663  | 21.7 | 27.7  |
| 0.94 | 0.87 | 0  | 29 | 1 | 27   | 0 | 1969.5 | 4.8 | 226 | 5.7  | <0.012 | 21.2 | 39.3  |
| 1.27 | 0.85 | 0  | 16 | 0 | 28   | 2 | 1041.8 | 4.8 | 166 | 5.7  | 0.061  | 20.9 | 49.9  |
| 1.36 | 1.03 | 0  | 28 | 0 | 29   | 0 | 2378   | 4.6 | 142 | 6.1  | 1.139  | 24.4 | 44    |
| 1.06 | 0.91 | 0  | 28 | 0 | 27   | 0 | 1948.2 | 4.5 | 174 | 5.5  | 0.095  | 21.8 | 32.5  |
| 0.76 | 0.74 | 0  | 25 | 1 | 29.5 | 0 | 1421   | 4.5 | 152 | 5.7  | <0.012 | 28   | 64.9  |
| 0.94 | 0.83 | 0  | 27 | 0 | 28   | 0 | 2201.7 | 4.5 | 277 | 5.9  | 0.604  | 23.3 | 38.9  |
| 1.03 | 1.05 | 0  | 27 | 0 | 28   | 0 | 2542.9 | 4.8 | 252 | 6.1  | 0.383  | 11.9 | 43.3  |
| 1.12 | 1.09 | 0  | 24 | 0 | 27.5 | 0 | 2488.6 | 4.8 | 226 | 5.6  | 0.036  | 17.5 | 58.3  |
| 1.39 | 1.06 | 0  | 29 | 0 | 28.5 | 1 | 2556.4 | 4.4 | 243 | 6.9  | 0.11   | 17.1 | 25.5  |
| 0.98 | 0.78 | 0  | 19 | 1 | 27   | 1 | 1592.8 | 4.8 | 159 | 9.5  | 0.108  | 23.9 | 34.1  |
| 1.04 | 0.93 | 0  | 28 | 2 | 25   | 0 | 1360.2 | 4.4 | 129 | 5.9  | 0.278  | 15.9 | 66.8  |
| 0.96 | 0.84 | 0  | 29 | 0 | 28   | 0 | 1891.3 | 4.7 | 179 | 6.2  | <0.012 | 22.3 | 34.7  |
| 1.09 | 1.03 | 0  | 27 | 0 | 28.5 | 1 | 1971.2 | 4.7 | 197 | 5.5  | 0.287  | 39.4 | 44.4  |
| 0.87 | 0.79 | 0  | 30 | 0 | 30   | 0 | 1469.3 | 4.5 | 196 | 5.7  | 0.07   | 21.9 | 43.7  |
| 1.10 | 0.85 | 0  | 30 | 0 | 27.5 | 0 | 2341.2 | 4.8 | 195 | 6.4  | 0.112  | 31.1 | 40.3  |
| 1.08 | 0.67 | 0  | 29 | 0 | 28   | 0 | 1209.3 | 4.5 | 219 | 5.8  | 0.018  | 24.2 | 24.1  |
| 1.20 | 0.89 | 0  | 27 | 0 | 27.5 | 0 | 3710.4 | 4.9 | 181 | 5.6  | 0.303  | 24.1 | 36.2  |
| 1.22 | 0.99 | 0  | 29 | 1 | 29   | 0 | 1589.2 | 4.7 | 209 | 5.4  | 0.016  | 17.1 | 39.7  |
| 1.23 | 0.89 | 0  | 25 | 0 | 28   | 1 | 528.64 | 4.5 | 190 | 8.4  | 2.523  | 13.8 | 51.7  |
| 0.96 | 1.03 | 0  | 28 | 0 | 30   | 0 | 1962.1 | 4.6 | 180 | 5.8  | 0.015  | 19.9 | 60.9  |
| 1.24 | 1.05 | 0  | 27 | 0 | 28.5 | 0 | 2227.8 | 4.3 | 191 | 6.2  | 0.086  | 26.4 | 45.5  |
| 1.07 | 0.85 | 0  | 30 | 0 | 27.5 | 0 | 2102.6 | 4.3 | 159 | 5.4  | <0.012 | 22.3 | 21.9  |
| 1.11 | 0.91 | 0  | 30 | 2 | 29.5 | 0 | 1838.3 | 4.9 | 203 | 5.9  | 0.079  | 14.4 | 37.3  |
| 1.01 | 0.97 | 0  | 30 | 1 | 28   | 0 | 1988   | 4.4 | 214 | 5.4  | <0.012 | 19.9 | 46.1  |
| 1.09 | 0.96 | 0  | 29 | 9 | 26   | 0 | 1661.6 | 4.1 | 184 | 5.8  | 0.022  | 22.6 | 68.8  |
| 1.04 | 0.77 | 0  | 27 | 0 | 27   | 0 | 1610.5 | 4.6 | 209 | 5.7  | 0.317  | 20   | 53.4  |
| 0.77 | 0.57 | 0  | 26 | 0 | 25.5 | 2 | 2177.8 | 4.5 | 210 | 5.7  | 0.945  | 19.8 | 37.3  |
| 1.18 | 0.91 | -1 | 24 | 7 | 26   | 2 | 1818   | 4.4 | 146 | 6    | 0.708  | 27.1 | 31.4  |
| 1.18 | 0.93 | 0  | 22 | 0 | 28   | 0 | 1542.3 | 4.5 | 155 | 5.3  | 0.044  | 29.2 | 55.1  |
| 1.00 | 0.84 | 0  | 27 | 4 | 26.5 | 0 | 1588.7 | 4.7 | 164 | 4.1  | 0.189  | 22.2 | 11.1  |
| 1.53 | 1.12 | 0  | 25 | 0 | 28.5 | 2 | 1980.3 | 4.8 | 162 | 6.6  | 0.027  | 36.8 | 23.3  |
| 1.52 | 1.06 | 0  | 30 | 2 | 29.5 | 2 | 1371.9 | 4.8 | 136 | 7.6  | 0.096  | 28.3 | 30.7  |
| 1.12 | 0.92 | 0  | 30 | 2 | 25.5 | 0 | 1487.7 | 4.7 | 181 | 5.2  | 1.861  | 23.3 | 23.7  |
| 1.13 | 0.92 | 0  | 29 | 0 | 27.5 | 0 | 2870.4 | 4.7 | 138 | 6.2  | 0.851  | 37.4 | 31.3  |
| 1.01 | 0.88 | 0  | 25 | 1 | 30   | 0 | 1717   | 4.5 | 215 | 6    | 0.025  | 16   | 27.8  |
| 0.98 | 0.82 | 0  | 17 | 2 | 25   | 2 | 1499   | 4.3 | 218 | 5.9  | <0.012 | 19.6 | 35.5  |
| 0.70 | 0.63 | 0  | 26 | 2 | 28   | 3 | 2361.6 | 4.3 | 166 | 7.1  | 0.124  | 19.5 | 38.9  |
| 1.08 | 0.76 | 0  | 20 | 1 | 26.5 | 1 | 2271.2 | 5   | 179 | 6.3  | 0.157  | 19.5 | 26.2  |
| 1.09 | 0.97 | 0  | 28 | 0 | 27   | 1 | 1981.5 | 4.5 | 252 | 9.4  | 0.056  | 16.6 | 24.7  |
| 0.93 | 0.83 | 0  | 25 | 2 | 27   | 0 | 1441.8 | 4.7 | 195 | 5.6  | <0.012 | 23.8 | 20.8  |
| 0.83 | 0.83 | 0  | 25 | 0 | 28   | 0 | 3271.5 | 4.9 | 174 | 5.9  | 0.04   | 25.6 | 47.5  |

|      |      |    |    |    |      |   |        |     |     |     |        |      |      |
|------|------|----|----|----|------|---|--------|-----|-----|-----|--------|------|------|
| 1.03 | 0.87 | 0  | 30 | 0  | 28   | 1 | 1998.8 | 4.9 | 155 | 5.1 | 0.019  | 7.2  | 19.9 |
| 1.01 | 0.80 | 0  | 28 | 0  | 29.5 | 1 | 1589   | 4.7 | 216 | 5.4 | 0.044  | 14.2 | 37.2 |
| 0.92 | 0.93 | 0  | 29 | 4  | 28   | 0 | 1952.2 | 4.6 | 200 | 5.7 | 0.081  | 22.3 | 39.1 |
| 1.03 | 0.79 | 0  | 22 | 2  | 27   | 0 | 1828.5 | 4.5 | 164 | 6.3 | 0.214  | 21   | 25.5 |
| 0.91 | 0.95 | 0  | 29 | 2  | 27   | 0 | 1667.4 | 4.6 | 134 | 5.6 | 0.099  | 30.3 | 32.8 |
| 1.18 | 1.08 | 0  | 27 | 4  | 26.5 | 0 | 2178.8 | 4.4 | 160 | 5.4 | 0.45   | 39.5 | 42.2 |
| 1.10 | 0.93 | 0  | 27 | 0  | 27.5 | 0 | 2716.6 | 4.7 | 240 | 6.2 | 0.49   | 12.8 | 31.8 |
| 1.16 | 1.01 | 0  | 23 | 1  | 28.5 | 0 | 1692.1 | 4.7 | 212 | 5.7 | 0.188  | 22.6 | 31.2 |
| 0.86 | 1.00 | 0  | 28 | 4  | 25.5 | 2 | 2368.4 | 4.2 | 174 | 5.5 | 0.398  | 20.8 | 22.9 |
| 1.01 | 0.72 | 0  | 25 | 1  | 29.5 | 0 | 1640.1 | 4   | 202 | 5.8 | 2.566  | 27.5 | 36.9 |
| 1.32 | 0.92 | 0  | 23 | 0  | 28   | 0 | 1732   | 4.4 | 199 | 5.5 | 0.076  | 16.5 | 64.6 |
| 1.02 | 0.85 | 0  | 24 | 5  | 26.5 | 0 | 1840.5 | 4.3 | 218 | 6.1 | 0.093  | 21.2 | 41.2 |
| 0.85 | 0.76 | 0  | 26 | 14 | 24.5 | 0 | 1291.7 | 4.7 | 205 | 5.7 | <0.012 | 15   | 31.9 |
| 1.15 | 0.84 | 0  | 29 | 1  | 28   | 0 | 1491.1 | 4.8 | 257 | 5.6 | <0.012 | 20.4 | 22.6 |
| 1.10 | 0.99 | 0  | 23 | 3  | 24.5 | 1 | 1070   | 4.1 | 163 | 4.9 | <0.012 | 14.9 | 31.2 |
| 0.95 | 0.84 | 0  | 22 | 0  | 28.5 | 2 | 1749.2 | 4.3 | 211 | 7.8 | 0.04   | 27.7 | 33.5 |
| 0.89 | 1.05 | 0  | 29 | 1  | 28.5 | 1 | 2180.6 | 4.4 | 193 | 5.5 | 0.045  | 21.9 | 40   |
| 1.00 | 0.91 | 0  | 29 | 1  | 26.5 | 0 | 1730.4 | 4.3 | 160 | 5.7 | 0.024  | 29.3 | 39.8 |
| 0.94 | 0.70 | 0  | 27 | 11 | 20.5 | 2 | 419.52 | 4.4 | 113 | 5.7 | 0.078  | 19.5 | 39.7 |
| 0.97 | 0.91 | 0  | 27 | 0  | 28   | 0 | 1820.4 | 4.3 | 234 | 6.4 | 0.088  | 29.6 | 48.5 |
| 0.92 | 0.91 | 0  | 30 | 0  | 28   | 0 | 2051.9 | 4.5 | 198 | 5.4 | 0.034  | 21   | 42.5 |
| 1.08 | 0.85 | 0  | 30 | 0  | 29.5 | 0 | 1399.4 | 4.6 | 181 | 5.6 | <0.012 | 23.6 | 71.6 |
| 1.10 | 0.95 | 0  | 27 | 0  | 29   | 0 | 1891.1 | 4.6 | 260 | 5.5 | 0.813  | 23.6 | 46.8 |
| 1.26 | 0.83 | 0  | 23 | 1  | 29.5 | 2 | 1167.6 | 4.6 | 169 | 5.2 | 0.084  | 26.1 | 50.4 |
| 1.11 | 0.86 | 0  | 26 | 0  | 29   | 1 | 2980.5 | 4.9 | 230 | 6   | 0.044  | 23   | 23   |
| 0.87 | 0.61 | 0  | 20 | 1  | 27   | 0 | 2292   | 4.4 | 146 | 5.7 | 0.402  | 15.5 | 31.1 |
| 0.90 | 0.86 | 0  | 25 | 0  | 25.5 | 2 | 2722.1 | 4.5 | 162 | 6.4 | 0.086  | 13.5 | 31.4 |
| 0.82 | 0.69 | 0  | 30 | 0  | 25.5 | 0 | 1451.4 | 4.7 | 146 | 5.2 | 0.017  | 4.8  | 44.8 |
| 1.21 | 1.08 | 0  | 25 | 1  | 30   | 0 | 1230.1 | 4.3 | 174 | 5.4 | <0.012 | 23.6 | 26.6 |
| 0.98 | 0.90 | 0  | 24 | 0  | 27.5 | 0 | 1952   | 4.8 | 249 | 6.3 | 0.751  | 15.8 | 69.5 |
| 1.12 | 0.93 | 0  | 30 | 0  | 29.5 | 0 | 1891.3 | 4.8 | 286 | 5.9 | 0.116  | 21.1 | 80.1 |
| 1.24 | 1.07 | 0  | 29 | 0  | 29   | 0 | 1848.2 | 4.5 | 210 | 5.8 | <0.012 | 30.6 | 31.6 |
| 0.95 | 0.96 | 0  | 27 | 1  | 29   | 0 | 1920.3 | 4.5 | 223 | 5.6 | <0.012 | 21.1 | 29.9 |
| 1.11 | 0.77 | 0  | 28 | 0  | 29.5 | 0 | 1527.9 | 4.1 | 199 | 5.7 | 0.037  | 21.5 | 46.3 |
| 1.15 | 1.09 | 0  | 30 | 0  | 28.5 | 0 | 2432   | 4.7 | 163 | 5.9 | 0.063  | 15.3 | 64.3 |
| 1.11 | 0.93 | 0  | 27 | 2  | 27   | 0 | 2342.5 | 4.7 | 238 | 5.1 | 0.036  | 23.2 | 37.1 |
| 1.53 | 1.21 | 0  | 27 | 0  | 28.5 | 0 | 1458.2 | 5.2 | 241 | 5.1 | 0.196  | 27.3 | 40.7 |
| 1.01 | 0.64 | -7 | 10 | 1  | 25   | 3 | 1551   | 4.5 | 192 | 5.5 | 0.224  | 13.2 | 74.2 |
| 1.26 | 1.00 | 0  | 28 | 1  | 28   | 1 | 2326.3 | 4.4 | 235 | 5.3 | 0.031  | 14.1 | 50   |
| 1.14 | 1.14 | 0  | 30 | 0  | 28.5 | 0 | 1892.4 | 4.2 | 169 | 5.5 | 0.124  | 24.4 | 19.9 |
| 0.82 | 0.74 | 0  | 30 | 0  | 28.5 | 1 | 2870.4 | 5.5 | 288 | 6.4 | 0.336  | 10.5 | 60.1 |
| 1.15 | 0.97 | 0  | 30 | 0  | 30   | 0 | 2498.4 | 4.7 | 208 | 5.7 | 0.08   | 21.5 | 28.1 |
| 0.93 | 0.64 | 0  | 30 | 3  | 28.5 | 1 | 3121.6 | 4.6 | 205 | 5.8 | 0.416  | 21.5 | 38.2 |
| 0.93 | 0.79 | 0  | 26 | 1  | 29.5 | 0 | 2232   | 4.5 | 282 | 5.6 | 0.101  | 19.1 | 62.2 |
| 1.13 | 0.92 | 0  | 21 | 1  | 29   | 2 | 2462.5 | 4.8 | 254 | 5.7 | 0.093  | 18.7 | 43.4 |
| 1.11 | 0.80 | 0  | 13 | 1  | 28.5 | 0 | 4161.7 | 4.4 | 182 | 5.7 | 0.447  | 23   | 35.8 |
| 1.21 | 1.13 | 0  | 30 | 0  | 29   | 1 | 3290   | 4.7 | 262 | 6   | 0.356  | 23.7 | 27.8 |
| 1.00 | 0.83 | 0  | 29 | 2  | 25.5 | 3 | 1720.3 | 4.5 | 196 | 5.6 | <0.012 | 26.2 | 32.8 |
| 1.48 | 1.04 | 0  | 30 | 0  | 28   | 0 | 1730.4 | 5   | 198 | 5.5 | <0.012 | 18.7 | 41.4 |
| 1.04 | 0.70 | 0  | 30 | 2  | 28.5 | 1 | 1450.4 | 4.2 | 202 | 6.1 | 0.051  | 23.9 | 40.1 |
| 1.08 | 0.91 | 0  | 30 | 0  | 27   | 1 | 1801.2 | 4.7 | 177 | 5.3 | <0.012 | 28.2 | 19.1 |
| 1.32 | 0.99 | 0  | 30 | 2  | 29.5 | 1 | 1971   | 4.7 | 152 | 6.1 | 0.032  | 39.2 | 31.3 |
| 1.09 | 0.77 | 0  | 27 | 1  | 29   | 1 | 2386.8 | 4.6 | 219 | 6.6 | 0.139  | 21.6 | 43.7 |
| 1.13 | 0.99 | 0  | 29 | 1  | 27   | 0 | 1547.9 | 4.2 | 216 | 5.5 | 0.181  | 19.7 | 29.3 |
| 0.92 | 0.80 | 0  | 18 | 4  | 26   | 1 | 1728.1 | 4.7 | 139 | 6.5 | 0.212  | 19.4 | 47.7 |
| 0.82 | 0.83 | 0  | 20 | 8  | 26   | 2 | 1430.8 | 4.2 | 153 | 5.9 | 0.481  | 22.1 | 42.9 |
| 1.00 | 1.01 | 0  | 25 | 0  | 27.5 | 2 | 1368.4 | 4.3 | 193 | 9.6 | 0.283  | 27.8 | 18.1 |
| 1.01 | 0.89 | 0  | 21 | 0  | 26.5 | 3 | 1401.1 | 4.4 | 218 | 5.4 | 0.065  | 25.2 | 27.1 |
| 0.85 | 0.87 | 0  | 27 | 2  | 27   | 1 | 2646.6 | 4.5 | 234 | 9.5 | 0.019  | 17.4 | 30.3 |
| 1.27 | 1.04 | 0  | 26 | 1  | 29   | 0 | 3349.1 | 4.6 | 202 | 6.2 | 0.069  | 20.6 | 29.4 |
| 1.03 | 0.89 | 0  | 28 | 1  | 28.5 | 1 | 1427.5 | 4.4 | 179 | 5.8 | 0.074  | 30.1 | 46.2 |
| 1.28 | 1.05 | 0  | 29 | 0  | 29.5 | 0 | 2727.5 | 4.2 | 191 | 5.7 | 0.454  | 19.8 | 44.1 |
| 1.25 | 0.96 | 0  | 28 | 1  | 30   | 0 | 1462.2 | 4.2 | 201 | 5.9 | 0.152  | 23.3 | 33.3 |
| 1.05 | 1.03 | 0  | 28 | 0  | 28.5 | 0 | 2821.9 | 4.7 | 195 | 5.3 | 0.017  | 22.4 | 30.8 |
| 1.20 | 1.19 | 0  | 29 | 0  | 28.5 | 0 | 2069.8 | 4.6 | 191 | 5   | <0.012 | 21   | 21.7 |
| 1.18 | 0.90 | 0  | 27 | 1  | 29.5 | 0 | 2482.2 | 4.9 | 174 | 5.5 | 0.189  | 15.2 | 21   |
| 1.17 | 0.86 | 0  | 28 | 17 | 28   | 0 | 3220.6 | 4.6 | 201 | 5.3 | 0.202  | 21.7 | 45.7 |
| 1.26 | 0.96 | 0  | 28 | 1  | 28   | 1 | 3183.4 | 4.6 | 256 | 5.8 | 0.018  | 12.7 | 43.7 |
| 1.16 | 0.81 | 0  | 30 | 0  | 28   | 0 | 1258.6 | 4.3 | 192 | 5.4 | <0.012 | 25.3 | 49.2 |
| 1.34 | 0.87 | 0  | 30 | 0  | 25.5 | 2 | 2889.9 | 4.7 | 283 | 5.2 | 0.019  | 15.7 | 30.9 |
| 1.01 | 0.72 | 0  | 29 | 5  | 26   | 2 | 1740.6 | 4.6 | 213 | 4.5 | 0.024  | 10.8 | 33.7 |
| 0.99 | 0.84 | 0  | 28 | 0  | 24.5 | 0 | 1501.6 | 4.5 | 219 | 5.3 | 0.988  | 14.6 | 54.9 |

|      |      |    |    |    |      |   |        |     |     |      |        |      |      |
|------|------|----|----|----|------|---|--------|-----|-----|------|--------|------|------|
| 1.09 | 0.99 | 0  | 21 | 1  | 26.5 | 3 | 1208.1 | 4.6 | 131 | 5.4  | <0.012 | 17.5 | 56.2 |
| 1.26 | 1.02 | 0  | 28 | 0  | 28.5 | 3 | 2356.9 | 4.7 | 154 | 6.6  | <0.012 | 16.8 | 29.7 |
| 1.00 | 0.80 | 0  | 28 | 1  | 29.5 | 0 | 2247   | 4.5 | 159 | 5.7  | 0.066  | 24.3 | 31.4 |
| 1.14 | 0.87 | 0  | 27 | 0  | 27   | 2 | 2247.5 | 4.5 | 232 | 5.1  | 0.054  | 19.8 | 40.4 |
| 1.13 | 0.91 | 0  | 30 | 0  | 28.5 | 3 | 1857.6 | 4.6 | 214 | 6.1  | 4.463  | 14.8 | 64.5 |
| 1.07 | 0.76 | 0  | 24 | 1  | 29.5 | 2 | 2158.7 | 4.5 | 195 | 5.3  | 0.02   | 20.5 | 30.2 |
| 1.00 | 0.81 | 0  | 26 | 2  | 26.5 | 1 | 1840   | 4.8 | 168 | 6.2  | 0.013  | 17.6 | 98.4 |
| 0.98 | 0.95 | 0  | 29 | 6  | 28.5 | 0 | 1350.5 | 4.9 | 166 | 5.7  | 0.054  | 21.3 | 41.4 |
| 0.81 | 0.91 | 0  | 29 | 2  | 27   | 2 | 2140.7 | 4.5 | 209 | 5.3  | 0.283  | 12.5 | 57.6 |
| 1.09 | 0.96 | 0  | 28 | 0  | 29   | 0 | 1369.7 | 4.5 | 195 | 5.2  | 0.155  | 24.3 | 44.7 |
| 1.33 | 0.91 | 0  | 29 | 1  | 28   | 1 | 1598.5 | 4.7 | 168 | 5    | 0.076  | 10.9 | 39.4 |
| 0.98 | 0.84 | 0  | 20 | 0  | 27.5 | 3 | 1882.3 | 4.8 | 198 | 6.3  | 0.047  | 20.5 | 18.5 |
| 1.03 | 0.87 | 0  | 24 | 0  | 29   | 1 | 1832.9 | 4.7 | 213 | 6.1  | 0.179  | 10.4 | 53.4 |
| 1.02 | 0.71 | 0  | 30 | 3  | 25.5 | 2 | 2122.2 | 4.7 | 196 | 5.9  | <0.012 | 13   | 48.2 |
| 1.14 | 0.95 | 0  | 29 | 0  | 25.5 | 3 | 2539.5 | 4.7 | 132 | 7.4  | 0.131  | 15   | 23.3 |
| 0.95 | 0.72 | 0  | 27 | 2  | 29.5 | 0 | 1629.5 | 4.8 | 197 | 5.8  | 0.025  | 15.7 | 31.1 |
| 1.23 | 1.21 | 0  | 30 | 0  | 29   | 0 | 1853   | 4.6 | 174 | 4.6  | 0.018  | 17.8 | 52.1 |
| 0.78 | 0.66 | 0  | 16 | 1  | 24   | 4 | 1901.2 | 4.5 | 221 | 5.8  | 0.103  | 19.8 | 51.4 |
| 1.12 | 0.98 | 0  | 30 | 0  | 28.5 | 0 | 2012.4 | 4.9 | 233 | 5.5  | 0.154  | 12.3 | 38.7 |
| 0.82 | 0.59 | 0  | 30 | 0  | 25.5 | 2 | 2851.2 | 4.7 | 234 | 5.9  | <0.012 | 17.6 | 88.6 |
| 1.06 | 0.76 | 0  | 30 | 0  | 29.5 | 0 | 1391.6 | 4.5 | 191 | 5.7  | 0.096  | 10.3 | 49.7 |
| 1.13 | 0.98 | 0  | 29 | 0  | 28.5 | 1 | 2327.3 | 4.7 | 197 | 6.5  | 0.23   | 16.8 | 41.1 |
| 1.06 | 0.83 | 0  | 29 | 0  | 25.5 | 2 | 1959.3 | 4.6 | 210 | 5.3  | <0.012 | 20.9 | 35.4 |
| 0.84 | 0.82 | 0  | 29 | 0  | 29   | 0 | 1958.9 | 4.7 | 191 | 4.5  | 0.987  | 16.5 | 24.3 |
| 0.97 | 0.87 | 0  | 28 | 0  | 27   | 0 | 2072.6 | 4.4 | 139 | 5.7  | 0.191  | 24.4 | 47.2 |
| 1.00 | 0.92 | 0  | 29 | 0  | 28   | 0 | 1440.6 | 4.5 | 180 | 5.6  | 0.286  | 14.6 | 13.5 |
| 1.04 | 0.85 | 0  | 26 | 0  | 27.5 | 2 | 1681.4 | 4.6 | 170 | 5.5  | 0.192  | 28   | 47   |
| 0.96 | 0.84 | 0  | 28 | 0  | 27   | 0 | 1212.1 | 4.5 | 179 | 5.9  | 0.047  | 29.2 | 17   |
| 1.38 | 0.99 | 0  | 29 | 0  | 27   | 0 | 1867.6 | 4.4 | 214 | 5.6  | 0.096  | 19.9 | 87.6 |
| 0.88 | 0.86 | 0  | 29 | 1  | 27.5 | 0 | 3227.6 | 4.8 | 207 | 5.7  | 0.051  | 22.3 | 45.4 |
| 1.28 | 1.16 | 0  | 30 | 1  | 28   | 1 | 1901.5 | 5.1 | 232 | 7.2  | 0.046  | 16.6 | 20.8 |
| 1.18 | 1.14 | 0  | 28 | 0  | 28.5 | 0 | 3159.5 | 4.7 | 167 | 5    | 0.194  | 21.3 | 30.2 |
| 0.87 | 0.71 | 0  | 27 | 1  | 25   | 0 | 4219.6 | 4.7 | 218 | 6.2  | <0.012 | 23.5 | 46   |
| 0.99 | 0.84 | 0  | 29 | 0  | 29   | 1 | 1501.8 | 4.8 | 177 | 6.1  | 0.146  | 21.9 | 50.6 |
| 1.00 | 0.81 | 0  | 26 | 1  | 29   | 1 | 1819.8 | 4.5 | 212 | 5.9  | 0.176  | 13.5 | 44.1 |
| 0.84 | 0.77 | 0  | 28 | 0  | 27.5 | 2 | 2318.4 | 4.6 | 162 | 7.3  | 0.503  | 15.8 | 30.9 |
| 1.09 | 0.81 | 0  | 25 | 0  | 27.5 | 0 | 1417.5 | 4.4 | 176 | 4.2  | 0.097  | 19.9 | 65.3 |
| 1.04 | 0.83 | 0  | 30 | 0  | 27.5 | 0 | 1241.2 | 4.5 | 195 | 5.8  | 0.016  | 10.7 | 41.8 |
| 1.03 | 0.78 | 0  | 30 | 0  | 27.5 | 2 | 1240.3 | 4.8 | 231 | 5.4  | <0.012 | 18.1 | 20   |
| 0.93 | 0.81 | 0  | 29 | 0  | 29   | 1 | 2869.1 | 4.7 | 197 | 5.8  | 0.041  | 17.8 | 50.2 |
| 0.69 | 0.76 | 0  | 20 | 11 | 28.5 | 1 | 2369.7 | 4.5 | 271 | 11.5 | 0.311  | 12.6 | 34.1 |
| 1.20 | 1.16 | 0  | 30 | 0  | 28.5 | 0 | 2487.7 | 4.6 | 204 | 6.7  | 0.463  | 11.1 | 53.4 |
| 0.97 | 0.89 | 0  | 25 | 2  | 26.5 | 2 | 2052.5 | 4.5 | 231 | 5.7  | 0.037  | 25.1 | 32.8 |
| 0.96 | 0.88 | 0  | 27 | 0  | 29   | 0 | 869    | 4.3 | 246 | 5.4  | <0.012 | 19.3 | 39.1 |
| 1.01 | 0.96 | 0  | 27 | 3  | 28.5 | 0 | 1782.2 | 4.3 | 159 | 5.9  | 0.049  | 25.6 | 27.4 |
| 0.96 | 0.65 | 0  | 26 | 0  | 27.5 | 0 | 1700.9 | 4.6 | 291 | 5.5  | 0.013  | 13.6 | 61.5 |
| 0.89 | 0.74 | 0  | 20 | 1  | 25.5 | 1 | 2527.6 | 4.8 | 257 | 9.6  | 0.062  | 25.6 | 23   |
| 1.01 | 0.83 | 0  | 26 | 1  | 27.5 | 0 | 1161.2 | 4.5 | 153 | 5.4  | 2.919  | 15.1 | 66.2 |
| 1.17 | 0.87 | 0  | 27 | 0  | 28   | 0 | 1459.1 | 4.5 | 182 | 6    | 0.024  | 9.4  | 46.1 |
| 0.70 | 0.66 | 0  | 21 | 2  | 28   | 0 | 1882.7 | 4.4 | 170 | 5.3  | 0.055  | 9.4  | 45   |
| 0.84 | 0.70 | 0  | 28 | 0  | 27   | 0 | 1860.9 | 4.8 | 235 | 6    | 0.058  | 16.2 | 20.3 |
| 1.53 | 0.99 | 0  | 29 | 2  | 27.5 | 0 | 2583.4 | 4.6 | 182 | 5.5  | 0.066  | 19.5 | 56.5 |
| 0.90 | 0.78 | 0  | 21 | 1  | 29   | 2 | 2018.6 | 4.8 | 268 | 6    | 0.038  | 16.6 | 75.3 |
| 1.08 | 0.83 | 0  | 30 | 0  | 28   | 0 | 1370.2 | 4.3 | 169 | 5.6  | 0.082  | 15.5 | 40.2 |
| 1.21 | 0.94 | 0  | 27 | 0  | 28   | 0 | 2927.9 | 4.3 | 235 | 5.9  | 0.138  | 16.2 | 43.8 |
| 1.01 | 0.91 | 0  | 30 | 0  | 28   | 0 | 1647.3 | 4.5 | 170 | 5.4  | 0.121  | 14.9 | 41.9 |
| 1.10 | 0.90 | 0  | 30 | 1  | 25   | 1 | 1318.1 | 4.8 | 207 | 5.2  | 0.196  | 9.3  | 39.3 |
| 0.85 | 0.80 | 0  | 19 | 0  | 28   | 2 | 2549.6 | 4.7 | 200 | 6.3  | 0.352  | 16.3 | 34.6 |
| 1.25 | 0.95 | 0  | 29 | 0  | 29.5 | 1 | 1958.7 | 4.5 | 216 | 6.2  | 0.041  | 27.8 | 64.1 |
| 1.27 | 0.91 | -1 | 28 | 6  | 28.5 | 3 | 1290.8 | 4.4 | 152 | 7    | 0.16   | 19   | 36.8 |
| 1.62 | 1.06 | 0  | 28 | 1  | 29.5 | 0 | 1151.3 | 4.6 | 172 | 6.2  | 0.048  | 22.5 | 31.5 |
| 1.04 | 1.01 | 0  | 30 | 0  | 27.5 | 0 | 3256.8 | 4.5 | 370 | 6.4  | 1.224  | 17.7 | 63.3 |
| 0.99 | 0.79 | 0  | 29 | 0  | 28   | 1 | 3207.2 | 4.4 | 229 | 5.9  | 0.152  | 21.6 | 29.8 |
| 1.34 | 1.03 | 0  | 30 | 0  | 27.5 | 0 | 2337.9 | 4.7 | 185 | 5.5  | 0.141  | 29.5 | 39.9 |
| 0.93 | 0.78 | 0  | 24 | 1  | 26.5 | 0 | 1878.8 | 4.7 | 231 | 5.6  | 0.04   | 24.7 | 27.7 |
| 1.17 | 0.86 | 0  | 25 | 2  | 29.5 | 0 | 3081.3 | 4.8 | 101 | 5.6  | 0.112  | 19.6 | 20.2 |
| 1.17 | 0.93 | 0  | 24 | 2  | 27.5 | 0 | 1069.2 | 4.5 | 159 | 5.1  | <0.012 | 4.8  | 71.8 |
| 1.21 | 1.04 | 0  | 29 | 1  | 28   | 0 | 2211.3 | 4.8 | 245 | 5.5  | 0.083  | 16.7 | 32.5 |
| 0.98 | 0.80 | 0  | 29 | 1  | 28   | 2 | 2387.1 | 4.4 | 173 | 5.1  | 0.02   | 16.9 | 26.7 |
| 1.04 | 0.86 | 0  | 27 | 1  | 27.5 | 0 | 1891.4 | 4.3 | 180 | 6.1  | <0.012 | 18.2 | 60.2 |
| 0.82 | 0.67 | 0  | 26 | 1  | 29   | 2 | 1621.7 | 4.1 | 224 | 5.8  | 0.886  | 23.2 | 42.1 |
| 1.08 | 0.88 | 0  | 29 | 1  | 27   | 0 | 2157.8 | 4.5 | 131 | 5.5  | 0.092  | 15.8 | 59.2 |

|      |      |   |    |    |      |   |        |     |     |     |        |      |       |
|------|------|---|----|----|------|---|--------|-----|-----|-----|--------|------|-------|
| 0.87 | 0.87 | 0 | 24 | 2  | 25.5 | 0 | 2399.4 | 5   | 266 | 7.2 | 0.22   | 20.6 | 36.2  |
| 1.09 | 0.96 | 0 | 30 | 0  | 28   | 2 | 1647.2 | 4.2 | 205 | 6.1 | 0.206  | 27.8 | 38.3  |
| 1.10 | 0.92 | 0 | 29 | 1  | 29.5 | 0 | 3496.6 | 4.7 | 184 | 6.5 | 1.073  | 22.3 | 39.1  |
| 1.20 | 0.85 | 0 | 27 | 1  | 30   | 0 | 2391   | 4.4 | 231 | 6.2 | 0.019  | 16.8 | 65.9  |
| 0.94 | 0.79 | 0 | 30 | 1  | 28.5 | 0 | 2749.8 | 4.7 | 226 | 5.6 | 0.016  | 17.3 | 43.4  |
| 1.06 | 0.60 | 0 | 27 | 6  | 29.5 | 2 | 1289.6 | 4.3 | 181 | 5.7 | 7.462  | 9.4  | 61.8  |
| 1.10 | 0.71 | 0 | 16 | 0  | 26   | 3 | 1808.1 | 4.5 | 183 | 5.5 | <0.012 | 19.6 | 52.8  |
| 0.81 | 0.65 | 0 | 24 | 2  | 28   | 1 | 3850.9 | 4.5 | 142 | 5.5 | 0.097  | 20.6 | 24.3  |
| 1.18 | 0.72 | 0 | 24 | 1  | 27   | 1 | 2162.6 | 4.6 | 248 | 5.6 | 0.152  | 20.9 | 44.4  |
| 1.00 | 0.77 | 0 | 28 | 0  | 28   | 0 | 1540.2 | 4.5 | 213 | 6   | 0.023  | 15.2 | 33.5  |
|      |      | 0 | 29 | 0  | 26.5 | 0 | 1579   | 4.3 | 167 | 5.7 | 0.141  | 24.7 | 38.6  |
| 1.24 | 0.99 | 0 | 29 | 0  | 27.5 | 0 | 1508.9 | 4.4 | 172 | 5.6 | 0.02   | 21.4 | 33.4  |
| 1.56 | 1.24 | 0 | 29 | 0  | 30   | 0 | 2230.2 | 4.6 | 158 | 5.6 | 0.059  | 29.4 | 26.9  |
| 0.86 | 0.74 | 0 | 29 | 3  | 24.5 | 3 | 1328.6 | 4.2 | 222 | 5.7 | 0.042  | 22.5 | 82.2  |
| 1.10 | 1.14 | 0 | 28 | 0  | 29.5 | 0 | 1287.8 | 4.6 | 223 | 5.6 | 0.191  | 17.8 | 43.7  |
| 1.19 | 0.99 | 0 | 28 | 0  | 29.5 | 0 | 1548   | 4.5 | 182 | 5.9 | 0.025  | 16.8 | 27.7  |
| 0.96 | 0.81 | 0 | 25 | 2  | 27   | 0 | 1738.6 | 4.6 | 220 | 5.9 | 0.015  | 23.2 | 43.6  |
| 0.89 | 0.71 | 0 | 24 | 6  | 25   | 4 | 1499.1 | 4.6 | 187 | 6.3 | 0.197  | 16.6 | 58.4  |
| 0.99 | 0.70 | 0 | 28 | 2  | 26   | 1 | 1601.1 | 4.5 | 211 | 5.7 | 0.793  | 24.6 | 38.3  |
| 0.93 | 0.81 | 0 | 24 | 0  | 27.5 | 0 | 2402.6 | 4.5 | 213 | 6.2 | 0.064  | 17.5 | 32.2  |
| 1.10 | 1.19 | 0 | 28 | 0  | 29.5 | 0 | 2410.7 | 4.3 | 165 | 6   | 2.161  | 35.1 | 22.8  |
| 1.36 | 1.26 | 0 | 26 | 0  | 29.5 | 0 | 2032.4 | 4.6 | 226 | 6   | 0.105  | 21.3 | 40.8  |
| 0.92 | 0.73 | 0 | 21 | 1  | 28   | 3 | 2041.1 | 4.5 | 189 | 7.7 | 0.164  | 15.2 | 106.9 |
| 1.03 | 0.91 | 0 | 27 | 0  | 28   | 0 | 1309.7 | 4.5 | 213 | 5.3 | 0.033  | 37.6 | 31.2  |
| 1.38 | 1.04 | 0 | 28 | 1  | 29.5 | 0 | 1506.5 | 4.5 | 235 | 5.6 | 0.098  | 27.8 | 15.6  |
| 1.18 | 1.16 | 0 | 29 | 0  | 29   | 0 | 2740.8 | 4.9 | 156 | 4.8 | <0.012 | 20.1 | 39.4  |
| 1.12 | 0.91 | 0 | 27 | 0  | 29.5 | 0 | 1421.4 | 4.7 | 231 | 5.5 | 0.167  | 20.2 | 19.3  |
| 0.93 | 0.81 | 0 | 29 | 0  | 27.5 | 2 | 1803.5 | 4.5 | 217 | 5.4 | 0.02   | 37.6 | 45.3  |
| 1.16 | 0.81 | 0 | 30 | 0  | 28.5 | 0 | 1768.9 | 4.3 | 198 | 6.1 | 0.016  | 15.7 | 67.5  |
| 1.10 | 1.06 | 0 | 27 | 0  | 28.5 | 1 | 2181.6 | 4.5 | 205 | 5.6 | <0.012 | 26.7 | 76.8  |
| 1.24 | 0.69 | 0 | 28 | 0  | 27   | 0 | 1617.6 | 4.2 | 175 | 5.7 | <0.012 | 24.8 | 26.8  |
| 1.09 | 0.96 | 0 | 27 | 0  | 28   | 0 | 1629.9 | 4.5 | 217 | 6.2 | 0.284  | 19.3 | 50.4  |
| 0.97 | 0.63 | 0 | 22 | 1  | 27   | 2 | 1987.9 | 4.7 | 208 | 5.3 | 0.295  | 19.3 | 28.7  |
| 0.97 | 0.97 | 0 | 28 | 0  | 28   | 0 | 2092.5 | 4.3 | 223 | 4.5 | 0.021  | 27   | 43.5  |
| 1.03 | 0.88 | 0 | 24 | 1  | 27   | 1 | 1839.1 | 4.5 | 174 | 6.1 | 0.048  | 30.9 | 43    |
| 0.99 | 0.83 | 0 | 27 | 0  | 27.5 | 0 | 1499.5 | 4.3 | 232 | 5.7 | 0.049  | 26.4 | 59.9  |
| 1.03 | 0.96 | 0 | 28 | 0  | 28   | 0 | 1711.3 | 4.6 | 144 | 5.8 | 0.189  | 20   | 47.8  |
| 1.00 | 0.89 | 0 | 28 | 0  | 29   | 0 | 1781.8 | 4.8 | 171 | 5.2 | 0.052  | 13.3 | 75.7  |
| 1.08 | 0.99 | 0 | 29 | 0  | 28.5 | 0 | 2301   | 4.5 | 211 | 5.5 | 0.276  | 20.3 | 64.2  |
| 0.79 | 0.75 | 0 | 30 | 8  | 28.5 | 0 | 1697.9 | 4.8 | 122 | 5.4 | 0.074  | 12.9 | 39.9  |
| 1.18 | 0.75 | 0 | 19 | 1  | 27.5 | 2 | 3282.5 | 5   | 236 | 6.5 | 0.208  | 24.4 | 153.7 |
| 0.63 | 0.68 | 0 | 23 | 3  | 29.5 | 2 | 2359.8 | 4.3 | 251 | 6.4 | 0.06   | 20.3 | 37.3  |
| 1.16 | 0.87 | 0 | 27 | 0  | 28.5 | 0 | 2319.9 | 4.7 | 175 | 5   | 0.013  | 30.5 | 64.6  |
| 0.80 | 0.90 | 0 | 30 | 12 | 27   | 2 | 819.34 | 4.6 | 218 | 5.3 | 0.836  | 26.1 | 49.1  |
| 1.26 | 1.07 | 0 | 28 | 1  | 27   | 1 | 2431.3 | 4.6 | 161 | 6.3 | 0.134  | 18.8 | 37.4  |
| 0.91 | 0.77 | 0 | 27 | 2  | 26   | 2 | 1408.3 | 4.6 | 171 | 6.1 | 0.033  | 7.4  | 27.5  |
| 1.05 | 0.91 | 0 | 28 | 2  | 25.5 | 0 | 1741.5 | 4.5 | 217 | 6   | 0.045  | 23   | 24.8  |
| 1.03 | 1.03 | 0 | 26 | 1  | 28   | 0 | 1933.6 | 4.8 | 234 | 6.2 | 0.026  | 19.8 | 35.2  |
| 0.96 | 0.92 | 0 | 29 | 0  | 28.5 | 0 | 2141.2 | 4.5 | 164 | 5.8 | 0.117  | 21.7 | 47.9  |
| 1.31 | 1.07 | 0 | 30 | 0  | 27.5 | 0 | 1562.2 | 4.8 | 180 | 5.4 | 0.047  | 30   | 45.9  |
| 0.78 | 0.63 | 0 | 28 | 0  | 26   | 0 | 1820.4 | 4.5 | 221 | 5.3 | <0.012 | 17.7 | 19.2  |
| 1.02 | 0.98 | 0 | 30 | 0  | 28.5 | 0 | 1522.2 | 4.5 | 207 | 5.5 | 0.022  | 17.1 | 34.3  |
| 0.97 | 0.82 | 0 | 30 | 0  | 27   | 0 | 2378   | 4.7 | 200 | 6.3 | 0.065  | 18.5 | 24.3  |
| 1.18 | 1.13 | 0 | 29 | 0  | 28   | 2 | 1480.9 | 4.5 | 202 | 5.7 | <0.012 | 27.4 | 14.6  |
| 0.90 | 0.94 | 0 | 27 | 0  | 28.5 | 0 | 1570.4 | 4.8 | 187 | 5.4 | 0.159  | 12.4 | 69.9  |
| 0.86 | 0.70 | 0 | 28 | 0  | 26.5 | 2 | 1202.9 | 4.6 | 188 | 5.1 | 0.056  | 21.3 | 62    |
| 0.89 | 0.91 | 0 | 22 | 1  | 27   | 0 | 1222.2 | 4.6 | 147 | 5.5 | 0.032  | 19.8 | 64.4  |
| 0.87 | 0.69 | 0 | 26 | 6  | 27.5 | 1 | 1989.6 | 4.9 | 146 | 6.4 | <0.012 | 21   | 58.7  |
| 0.93 | 0.78 | 0 | 29 | 2  | 27.5 | 0 | 1308.5 | 4.8 | 175 | 5.1 | 0.093  | 24.1 | 48.8  |
| 1.14 | 1.09 | 0 | 29 | 0  | 29   | 1 | 1968.9 | 4.8 | 200 | 8.1 | 0.142  | 17.9 | 15.1  |
| 0.89 | 0.81 | 0 | 24 | 1  | 28   | 0 | 1608.9 | 4.5 | 239 | 5.9 | 0.028  | 13.6 | 152.5 |
| 0.86 | 0.80 | 0 | 29 | 9  | 27.5 | 1 | 1608.8 | 4.6 | 193 | 6.4 | 0.096  | 17.6 | 48.9  |
| 1.09 | 0.83 | 0 | 24 | 1  | 28.5 | 0 | 2239.4 | 4.5 | 198 | 5.6 | <0.012 | 12.9 | 22.7  |
| 1.04 | 0.82 | 0 | 29 | 0  | 27.5 | 0 | 1930.6 | 4.7 | 145 | 5.7 | 0.034  | 39.4 | 39.7  |
| 1.13 | 0.83 | 0 | 26 | 0  | 29.5 | 0 | 2280.2 | 4.4 | 149 | 6   | 0.03   | 23   | 26.5  |
| 1.02 | 0.98 | 0 | 30 | 1  | 28   | 0 | 1279.7 | 4.8 | 130 | 4.5 | <0.012 | 29   | 36.3  |
| 1.05 | 0.91 | 0 | 28 | 0  | 27.5 | 1 | 1440.5 | 4.3 | 187 | 6.2 | 0.169  | 24   | 19.1  |
| 1.31 | 1.01 | 0 | 27 | 0  | 28.5 | 1 | 2180   | 4.2 | 149 | 4.8 | 0.022  | 25.6 | 38.4  |
| 1.32 | 1.05 | 0 | 30 | 0  | 28   | 0 | 2272.9 | 4.5 | 173 | 5.9 | 0.268  | 14.5 | 83.6  |
| 1.30 | 1.13 | 0 | 30 | 0  | 28.5 | 0 | 1871.8 | 4.5 | 218 | 5.4 | 0.014  | 30.6 | 40.5  |
| 0.93 | 0.80 | 0 | 28 | 0  | 27.5 | 0 | 1527.8 | 4.7 | 119 | 4.7 | 0.022  | 21.5 | 26    |
| 0.81 | 0.64 | 0 | 29 | 7  | 26   | 0 | 3424.3 | 4.9 | 253 |     | 2.713  | 23.9 | 20.9  |

|      |      |    |    |   |      |   |        |     |     |      |        |      |      |
|------|------|----|----|---|------|---|--------|-----|-----|------|--------|------|------|
| 0.83 | 0.74 | -1 | 25 | 7 | 25.5 | 3 | 4179.6 | 4.6 | 152 | 8.7  | 2.008  | 28.3 | 18.5 |
| 1.02 | 0.85 | 0  | 21 | 0 | 28.5 | 0 | 2050.4 | 4.6 | 197 | 5.3  | 0.041  | 19.9 | 36.4 |
| 1.10 | 0.90 | 0  | 27 | 1 | 28   | 1 | 2579.7 | 4.6 | 245 | 5.6  | 0.043  | 21.6 | 12.6 |
| 1.54 | 0.92 | 0  | 20 | 8 | 26.5 | 2 | 1629.6 | 4.7 | 212 | 5.4  | 0.045  | 29   | 37.7 |
| 0.95 | 0.94 | 0  | 21 | 3 | 28   | 2 | 2031.9 | 4.6 | 151 | 5.2  | 0.068  | 26.5 | 49.5 |
| 0.77 | 0.63 | 0  | 22 | 0 | 28   | 0 | 2230.9 | 4.3 | 240 | 5.3  | 0.081  | 17.3 | 45.7 |
| 1.02 | 0.82 | 0  | 30 | 0 | 27   | 0 | 2910.4 | 4.8 | 186 | 5.5  | 0.038  | 16.4 | 18.1 |
| 0.77 | 0.83 | 0  | 30 | 0 | 27.5 | 0 | 2469.7 | 4.6 | 233 | 6.5  | 0.069  | 17.6 | 25.5 |
| 1.36 | 0.89 | 0  | 29 | 0 | 29   | 2 | 1658.3 | 4.4 | 225 | 5.6  | 0.03   | 23.6 | 41.3 |
| 1.01 | 0.89 | 0  | 29 | 0 | 27.5 | 0 | 2069.8 | 4.4 | 208 | 5.9  | 0.054  | 8.1  | 55.7 |
| 0.98 | 0.81 | 0  | 26 | 0 | 27.5 | 0 | 1119.5 | 4.6 | 176 | 5.6  | 0.045  | 21.2 | 36.2 |
| 0.83 | 0.69 | 0  | 27 | 5 | 25.5 | 0 | 1700.2 | 4.4 | 230 | 5.9  | 0.071  | 17.7 | 34.9 |
| 1.19 | 0.98 | 0  | 29 | 1 | 25   | 0 | 1658.3 | 4.4 | 273 | 5.9  | 0.022  | 25   | 31.7 |
| 0.79 | 0.73 | 0  | 20 | 2 | 25   | 2 | 1431.2 | 4.7 | 251 | 5.5  | 1.026  | 21.3 | 46.6 |
| 1.18 | 0.77 | 0  | 28 | 0 | 28.5 | 0 | 959    | 4.7 | 242 | 5.6  | 0.027  | 18.6 | 29.1 |
| 0.94 | 0.73 | 0  | 30 | 0 | 28   | 0 | 1611.6 | 4.9 | 260 | 5.7  | 0.164  | 16.4 | 44.4 |
| 1.18 | 1.02 | 0  | 28 | 0 | 28.5 | 2 | 1922.6 | 5   | 219 | 5.7  | 1.552  | 25.8 | 11.6 |
| 1.10 | 0.87 | 0  | 30 | 1 | 29.5 | 0 | 3052.7 | 4.5 | 218 | 5.5  | 0.047  | 15.3 | 36.2 |
| 1.14 | 1.04 | 0  | 26 | 1 | 28.5 | 0 | 2259.8 | 5   | 202 | 5.8  | 0.014  | 24.6 | 53.7 |
| 0.98 | 0.79 | 0  | 30 | 0 | 26   | 2 | 1160.3 | 4.8 | 206 | 5.9  | 0.032  | 9.7  | 40   |
| 0.95 | 0.99 | 0  | 25 | 0 | 28   | 0 | 1269.2 | 4.8 | 163 | 5.5  | 0.38   | 23.2 | 89.1 |
| 1.09 | 1.09 | 0  | 26 | 0 | 28.5 | 0 | 1168.1 | 4.2 | 208 | 5.6  | 0.246  | 28.5 | 46.9 |
| 1.10 | 0.83 | 0  | 27 | 1 | 28.5 | 0 | 1799.5 | 4.6 | 280 | 5.2  | 0.582  | 19   | 66.5 |
| 1.18 | 1.13 | 0  | 28 | 0 | 29   | 0 | 1782   | 4.5 | 175 | 5.7  | 0.028  | 23.7 | 39.7 |
| 0.96 | 0.93 | 0  | 30 | 0 | 29.5 | 0 | 3030   | 4.7 | 168 | 5.9  | 0.061  | 17.6 | 67.3 |
| 1.34 | 0.89 | 0  | 25 | 0 | 28   | 5 | 1187.5 | 4.5 | 176 | 8.6  | 0.077  | 28   | 33.6 |
| 0.89 | 0.73 | 0  | 22 | 0 | 25   | 3 | 2406.4 | 4.3 | 200 | 5.9  | 2.465  | 19.1 | 56   |
| 0.91 | 0.74 | 0  | 26 | 1 | 23   | 1 | 1659.7 | 4.5 | 212 | 6.1  | 0.026  | 16.9 | 28.9 |
| 1.24 | 0.92 | 0  | 30 | 0 | 28   | 1 | 1600.2 | 4.4 | 188 | 5.3  | 0.06   | 20.9 | 30.5 |
| 1.10 | 1.11 | 0  | 29 | 0 | 29.5 | 0 | 1827.4 | 5.3 | 185 | 5.9  | 0.184  | 10.6 | 27.6 |
| 0.87 | 0.73 | 0  | 29 | 1 | 27.5 | 1 | 2068.2 | 5   | 195 | 6.9  | 0.043  | 25.8 | 26.4 |
| 1.11 | 0.82 | 0  | 28 | 3 | 29.5 | 1 | 2432.9 | 4.7 | 255 | 7.2  | 0.026  | 18.7 | 52.4 |
| 1.14 | 0.75 | 0  | 28 | 5 | 27.5 | 1 | 1669.8 | 4.4 | 151 | 6.6  | 1.181  | 18   | 52.5 |
| 1.21 | 0.72 | 0  | 28 | 1 | 27   | 0 | 1299.6 | 4.5 | 226 | 5.5  | <0.012 | 21.5 | 32.4 |
| 0.88 | 0.70 | 0  | 29 | 0 | 28.5 | 1 | 2871.7 | 4.3 | 188 | 6    | 0.088  | 11.2 | 43.4 |
| 1.11 | 0.83 | 0  | 24 | 0 | 26   | 1 | 3717.6 | 4.7 | 141 | 6.4  | 0.388  | 17.9 | 17.2 |
| 1.33 | 1.04 | 0  | 30 | 0 | 27.5 | 0 | 2546.9 | 4.7 | 299 | 5.7  | 0.318  | 15.3 | 40.2 |
| 1.30 | 0.89 | 0  | 29 | 2 | 28   | 0 | 1858.6 | 4.5 | 206 | 5.9  | 0.227  | 13.5 | 28.6 |
| 1.01 | 0.81 | 0  | 22 | 6 | 26.5 | 2 | 1520.3 | 4.2 | 167 | 5.5  | 0.351  | 21.9 | 39.4 |
| 1.26 | 0.84 | 0  | 26 | 0 | 28   | 0 | 1158.8 | 4.8 | 173 | 5.3  | 0.025  | 15   | 18.5 |
| 0.74 | 0.56 | 0  | 18 | 0 | 26.5 | 2 | 1407.8 | 4.1 | 150 | 5.2  | 0.056  | 21.1 | 36.2 |
| 0.91 | 0.77 | 0  | 27 | 0 | 26.5 | 0 | 2310.9 | 4.6 | 149 | 5.8  | <0.012 | 16.3 | 37.3 |
| 0.96 | 0.85 | 0  | 30 | 1 | 26.5 | 1 | 770.57 | 4.1 | 167 | 4.6  | 0.039  | 18.8 | 39.2 |
| 1.01 | 0.86 | 0  | 29 | 8 | 27   | 1 | 1230   | 4.6 | 224 | 5.5  | 1.85   | 18.3 | 57.6 |
| 0.96 | 0.81 | 0  | 30 | 1 | 25.5 | 2 | 2828.9 | 4.2 | 219 | 5.7  | 0.06   | 24.5 | 36.9 |
| 0.79 | 0.62 | -2 | 13 | 1 | 27   | 2 | 2209.7 | 4.6 | 178 | 5.9  | 0.054  | 18.8 | 61.7 |
| 0.94 | 0.73 | 0  | 8  | 0 | 25   | 3 | 1328.4 | 4.5 | 143 | 6.2  | <0.012 | 30.3 | 53.9 |
| 1.26 | 0.89 | 0  | 29 | 0 | 28.5 | 0 | 2101.9 | 4.6 | 195 | 6    | 0.023  | 18.6 | 42.9 |
| 1.03 | 0.72 | 0  | 27 | 0 | 30   | 0 | 1820.3 | 4.7 | 228 | 5.8  | <0.012 | 23.5 | 31.6 |
| 1.06 | 0.88 | 0  | 30 | 0 | 28.5 | 2 | 851.15 | 4.8 | 179 | 5.5  | 0.012  | 18.9 | 42.9 |
| 0.92 | 0.88 | 0  | 27 | 0 | 27   | 0 | 2608.3 | 4.3 | 189 | 6    | 0.039  | 28.6 | 18.5 |
| 1.05 | 0.86 | 0  | 30 | 0 | 29.5 | 0 | 1440   | 4.8 | 171 | 5.5  | 0.113  | 20.4 | 52.2 |
| 0.97 | 0.91 | 0  | 30 | 0 | 25.5 | 0 | 2337.7 | 4.3 | 215 | 6.1  | 0.105  | 14.6 | 34.6 |
| 1.04 | 0.83 | 0  | 28 | 0 | 29   | 0 | 2362.4 | 4.9 | 192 | 5.9  | 0.145  | 20.7 | 28.9 |
| 0.88 | 0.78 | 0  | 27 | 1 | 24   | 2 | 1342   | 4.7 | 225 | 6.1  | 0.162  | 18.2 | 48.5 |
| 0.96 | 0.81 | 0  | 25 | 2 | 27.5 | 2 | 2430.4 | 4.5 | 189 | 7.1  | 0.176  | 27.3 | 24.8 |
| 1.04 | 0.90 | 0  | 28 | 0 | 29.5 | 0 | 2050.9 | 4.4 | 178 | 5.7  | 0.018  | 35.1 | 32.2 |
| 0.99 | 0.79 | 0  | 29 | 1 | 26.5 | 1 | 2328.5 | 4.7 | 156 | 7.6  | 0.077  | 12.6 | 11.6 |
| 1.41 | 0.68 | 0  | 25 | 0 | 27   | 0 | 2000.7 | 4.4 | 189 | 6.1  | 0.091  | 18.3 | 30.2 |
| 0.91 | 0.73 | 0  | 29 | 5 | 24.5 | 2 | 2400.1 | 4.7 | 128 | 6    | 0.067  | 25.8 | 22   |
| 0.91 | 0.80 | 0  | 27 | 2 | 26   | 1 | 1841   | 4.4 | 126 | 6.7  | 0.021  | 12.2 | 77.1 |
| 1.21 | 1.01 | 0  | 28 | 1 | 28   | 0 | 1951.6 | 4.7 | 214 | 5.5  | 0.03   | 21.7 | 47.3 |
| 0.95 | 0.86 | 0  | 29 | 0 | 27.5 | 0 | 2936.9 | 4.9 | 153 | 6.3  | 0.019  | 22.7 | 48.2 |
| 1.00 | 0.82 | 0  | 23 | 0 | 27.5 | 1 | 2527.5 | 4.6 | 155 | 10.3 | 0.028  | 18.4 | 46   |
| 1.07 | 0.87 | 0  | 30 | 0 | 28   | 1 | 1869.8 | 5.1 | 195 | 8.8  | 0.069  | 23.2 | 20.6 |
| 1.26 | 0.86 | 0  | 27 | 0 | 30   | 0 | 4380.3 | 4.6 | 210 | 6.3  | 0.567  | 22.9 | 31.1 |
| 0.96 | 0.91 | 0  | 19 | 5 | 28.5 | 1 | 1418.3 | 4.3 | 160 | 6    | 0.037  | 35.8 | 30   |
| 1.16 | 0.82 | 0  | 27 | 0 | 24.5 | 1 | 2201.1 | 4.5 | 165 | 5    | 0.457  | 20.4 | 52.8 |
| 1.11 | 0.86 | 0  | 30 | 0 | 24.5 | 2 | 1289.2 | 4.2 | 192 | 5.6  | <0.012 | 21.5 | 46.6 |
| 1.35 | 1.10 | 0  | 30 | 1 | 27.5 | 0 | 2557.8 | 4.7 | 224 | 5.8  | 0.045  | 22.8 | 45.5 |
| 1.16 | 1.06 | 0  | 30 | 1 | 27.5 | 0 | 1777.8 | 4.5 | 190 | 5.1  | 0.014  | 22   | 61.8 |
| 1.04 | 0.95 | 0  | 27 | 0 | 27.5 | 2 | 1557.9 | 4.4 | 223 | 5.9  | 0.014  | 22.7 | 37.1 |

|      |      |     |    |   |      |   |        |     |     |     |        |      |      |
|------|------|-----|----|---|------|---|--------|-----|-----|-----|--------|------|------|
| 1.02 | 0.66 | 0   | 27 | 0 | 28   | 3 | 2588.3 | 4.4 | 223 | 5.7 | 0.073  | 21.8 | 37.2 |
| 0.93 | 0.95 | 0   | 29 | 0 | 27.5 | 1 | 1762.2 | 4.9 | 160 | 5.3 | 0.1    | 22.8 | 39.5 |
| 1.14 | 0.89 | 0   | 27 | 0 | 28   | 0 | 1520.4 | 4.4 | 182 | 6   | 0.211  | 19.9 | 87.1 |
| 0.91 | 0.91 | 0   | 27 | 1 | 27   | 0 | 2308.9 | 4.6 | 164 | 5.5 | <0.012 | 21.7 | 18.5 |
| 0.93 | 0.77 | 0   | 27 | 0 | 28.5 | 0 | 2282.3 | 4.7 | 188 | 6.5 | 0.017  | 25.3 | 43.2 |
| 1.14 | 0.87 | 0   | 29 | 1 | 30   | 2 | 2160.1 | 4.5 | 245 | 7.8 | 0.221  | 17.3 | 40.5 |
| 0.90 | 0.71 | 0   | 29 | 5 | 26   | 0 | 1288.6 | 4.6 | 180 | 5.1 | 0.021  | 18   | 50.1 |
| 1.10 | 0.76 | 0   | 29 | 2 | 28.5 | 0 | 2530.8 | 4.4 | 195 | 6   | 0.479  | 20.7 | 37.8 |
| 0.81 | 0.67 | 0   | 30 | 0 | 24.5 | 2 | 1900.1 | 4.6 | 173 | 5.8 | 0.467  | 25.6 | 27.7 |
| 1.24 | 0.84 | 0   | 30 | 5 | 29   | 1 | 2298.7 | 4.4 | 145 | 5.5 | 0.053  | 17.7 | 44.7 |
| 0.85 | 0.76 | 0   | 24 | 0 | 25.5 | 0 | 998.4  | 4   | 159 | 4.8 | 0.102  | 32.9 | 50.6 |
| 0.86 | 0.72 | -15 | 18 | 7 | 26.5 | 0 | 1310.5 | 4.6 | 162 | 5.5 | 0.041  | 19.3 | 28.2 |
| 1.49 | 0.95 | 0   | 26 | 0 | 29   | 0 | 2579.9 | 5   | 200 | 5.8 | 0.067  | 26.1 | 44.5 |
| 1.02 | 0.78 | 0   | 29 | 0 | 28.5 | 0 | 2093.5 | 5.1 | 249 | 5.5 | 0.184  | 16.5 | 41.6 |
| 1.22 | 1.17 | 0   | 29 | 1 | 28   | 0 | 1538.7 | 4.5 | 202 | 5.3 | 0.02   | 22.9 | 15.1 |
| 1.10 | 1.13 | 0   | 29 | 0 | 25.5 | 3 | 1470.2 | 4.6 | 203 | 8   | 0.157  | 21.9 | 48.9 |
| 1.51 | 1.01 | -2  | 24 | 1 | 25   | 1 | 2429   | 4.4 | 112 | 9.1 | 0.015  | 25.5 | 36.7 |
| 1.16 | 0.82 | 0   | 27 | 0 | 24.5 | 0 | 1869   | 4.5 | 152 | 6   | <0.012 | 20.2 | 37.6 |
| 1.15 | 0.75 | 0   | 28 | 1 | 26   | 3 | 1571.3 | 4.7 | 236 | 6.3 | 0.051  | 19.9 | 45   |
| 1.12 | 0.79 | 0   | 29 | 1 | 28.5 | 0 | 2489.3 | 4.6 | 177 | 5.9 | 0.013  | 22.5 | 45.8 |
| 1.24 | 0.88 | 0   | 29 | 0 | 28.5 | 0 | 1758.2 | 4.5 | 264 | 5.7 | 0.019  | 20.2 | 45.9 |
| 1.13 | 1.15 | 0   | 23 | 1 | 27.5 | 0 | 1940.5 | 4.6 | 197 | 6.3 | 1.06   | 21.4 | 43.5 |
| 0.83 | 0.73 | 0   | 29 | 0 | 26   | 0 | 1819.8 | 4.6 | 141 | 5.4 | 0.059  | 14.6 | 71.9 |
| 1.37 | 1.03 | 0   | 30 | 2 | 28.5 | 1 | 1578   | 4.1 | 169 | 5.5 | 0.061  | 18.7 | 44.5 |
| 0.74 | 0.70 | 0   | 22 | 0 | 27   | 2 | 1687.7 | 4.7 | 213 | 5.7 | <0.012 | 19.4 | 52.6 |
| 0.92 | 0.75 | 0   | 22 | 0 | 29   | 2 | 1821.2 | 4.6 | 193 | 5.5 | 0.026  | 15.9 | 55   |
| 0.82 | 0.73 | 0   | 28 | 1 | 27.5 | 0 | 1482.2 | 4.6 | 160 | 4.8 | 0.386  | 41.3 | 30.5 |
| 1.07 | 0.70 | 0   | 26 | 0 | 28   | 0 | 1761.8 | 4.4 | 213 | 5.6 | 0.029  | 22.3 | 38.4 |
| 0.90 | 0.72 | 0   | 29 | 2 | 26   | 0 | 1809.6 | 4.7 | 153 | 5.3 | <0.012 | 29.9 | 24.7 |
| 1.06 | 1.02 | 0   | 27 | 3 | 28.5 | 0 | 2332.2 | 4.3 | 189 | 6   | 0.027  | 19.3 | 33.6 |
|      |      | 0   | 29 | 0 | 27   | 0 | 909.72 | 4.4 | 181 | 6   | <0.012 | 23.9 | 16.5 |
| 1.60 | 1.12 | 0   | 29 | 1 | 27   | 1 | 1767.3 | 4.5 | 200 | 6   | 0.092  | 28   | 31.1 |
| 1.08 | 0.80 | 0   | 25 | 2 | 28.5 | 0 | 2278.5 | 4.3 | 194 | 5.6 | 0.012  | 31.9 | 47.2 |
| 0.83 | 0.85 | 0   | 28 | 3 | 28   | 0 | 2692.2 | 4.5 | 271 | 6   | 0.027  | 18.8 | 48.7 |
| 0.95 | 0.90 | 0   | 27 | 0 | 27.5 | 0 | 1749.4 | 4.6 | 207 | 5   | 0.036  | 24   | 53.7 |
| 1.24 | 0.97 | 0   | 28 | 0 | 28.5 | 0 | 2207.4 | 4.9 | 228 | 5.1 | 0.089  | 19.4 | 68   |
| 0.71 | 0.62 | 0   | 18 | 1 | 24.5 | 3 | 1478.5 | 3.4 | 156 | 5.1 | 0.098  | 32.4 | 50.5 |
| 1.39 | 0.85 | 0   | 29 | 6 | 25.5 | 4 | 900.22 | 3.6 | 169 | 6.1 | 2.644  | 17.4 | 79.3 |
| 0.87 | 0.81 | 0   | 24 | 2 | 26.5 | 4 | 1742.6 | 4.5 | 168 | 5.7 | 0.091  | 31   | 28.6 |
| 0.95 | 0.90 | 0   | 28 | 0 | 27.5 | 0 | 1937.5 | 4.7 | 215 | 5.3 | <0.012 | 30.3 | 27.4 |
| 1.04 | 0.88 | 0   | 23 | 1 | 28   | 1 | 2748.6 | 4.5 | 215 | 9   | 0.386  | 16.7 | 43.2 |
| 1.18 | 0.99 | 0   | 28 | 0 | 29.5 | 1 | 1312.1 | 4.6 | 186 | 5.6 | 0.128  | 48.1 | 41.2 |
| 1.19 | 0.89 | 0   | 28 | 1 | 28.5 | 1 | 1248.6 | 4.5 | 204 | 5.4 | 0.028  | 21.4 | 39.7 |
| 1.05 | 0.80 | 0   | 30 | 0 | 27   | 0 | 2300.4 | 4.6 | 207 | 5.7 | 0.028  | 22.4 | 70.6 |
| 0.90 | 0.90 | 0   | 30 | 0 | 26   | 0 | 1869.6 | 4.3 | 172 | 5.8 | <0.012 | 11   | 49.7 |
| 0.98 | 1.01 | 0   | 28 | 0 | 27.5 | 0 | 1838.9 | 4.8 | 164 | 5.3 | 0.036  | 26.9 | 53.8 |
| 1.08 | 1.00 | 0   | 25 | 0 | 29   | 2 | 2720.3 | 4.2 | 121 | 5.5 | 0.225  | 21.8 | 22.8 |
| 1.21 | 1.03 | 0   | 28 | 1 | 28   | 1 | 1759.1 | 4.8 | 204 | 6.4 | 0.261  | 13.7 | 58.5 |
| 0.66 | 0.69 | 0   | 24 | 4 | 30   | 1 | 1770.3 | 5   | 213 | 5.7 | 0.114  | 21.9 | 90.1 |
| 0.89 | 0.79 | 0   | 27 | 1 | 27.5 | 0 | 1752.1 | 4.5 | 204 | 5.5 | <0.012 | 42.2 | 25.7 |
| 1.09 | 0.70 | 0   | 29 | 0 | 28.5 | 0 | 2327.1 | 4.2 | 194 | 6.6 | 0.102  | 22.1 | 29.9 |
| 1.16 | 0.81 | 0   | 27 | 0 | 28.5 | 0 | 1588   | 5.1 | 201 | 5.3 | 0.036  | 39.9 | 69.9 |
| 0.72 | 0.74 | 0   | 29 | 3 | 25.5 | 1 | 2082.3 | 4.2 | 157 | 5.9 | <0.012 | 32.4 | 26.8 |
| 1.05 | 0.85 | 0   | 29 | 0 | 30   | 0 | 3313.2 | 4.6 | 207 | 5.5 | 0.043  | 24.2 | 26.8 |
| 1.09 | 0.86 | 0   | 28 | 0 | 26   | 0 | 1970.9 | 4.7 | 177 | 5.5 | <0.012 | 31.8 | 34   |
| 1.03 | 0.98 | 0   | 24 | 0 | 27.5 | 1 | 1238.8 | 4.3 | 202 | 6.2 | 0.083  | 28   | 33.9 |
| 0.90 | 0.62 | 0   | 30 | 0 | 28   | 0 | 2157.8 | 4.5 | 228 | 6   | 0.057  | 13.2 | 21.4 |
| 0.72 | 0.71 | 0   | 28 | 1 | 30   | 0 | 3237.5 | 4.8 | 160 | 5.6 | 0.284  | 18.2 | 24.1 |
| 1.10 | 0.92 | 0   | 30 | 0 | 28.5 | 0 | 1170.9 | 4.6 | 208 | 5.8 | 0.163  | 18.4 | 61.2 |
| 1.30 | 0.89 | 0   | 24 | 1 | 27   | 1 | 2222.3 | 4.9 | 209 | 5.2 | <0.012 | 14.9 | 64.8 |
| 1.36 | 0.93 | 0   | 27 | 1 | 27   | 0 | 1888.3 | 4.2 | 199 | 5.7 | 0.038  | 25.5 | 42.1 |
| 1.17 | 0.81 | 0   | 29 | 0 | 27   | 1 | 1613.3 | 4.5 | 252 | 5.7 | 0.129  | 18.9 | 64.4 |
| 0.79 | 0.75 | 0   | 24 | 4 | 26.5 | 2 | 1540.4 | 4.4 | 223 | 5.7 | 0.318  | 15.5 | 53.8 |
| 1.06 | 0.85 | 0   | 28 | 0 | 27   | 2 | 2330.2 | 4.8 | 156 | 5.7 | <0.012 | 27   | 34.6 |
| 1.06 | 0.81 | 0   | 28 | 1 | 27   | 0 | 1611.6 | 4.7 | 203 | 5   | <0.012 | 13.8 | 56.1 |
| 0.93 | 0.76 | 0   | 14 | 3 | 27.5 | 0 | 2101.6 | 4.6 | 203 | 5.4 | 0.205  | 20.4 | 52.1 |
| 1.37 | 0.93 | 0   | 30 | 0 | 28.5 | 0 | 1687.8 | 4.5 | 217 | 5.4 | 0.159  | 18.7 | 38.1 |
| 1.23 | 0.85 | 0   | 24 | 0 | 29.5 | 0 | 2318.6 | 4.6 | 206 | 5.5 | 0.136  | 28.9 | 54.2 |
| 1.15 | 0.88 | 0   | 29 | 0 | 26.5 | 0 | 1452.1 | 4.6 | 132 | 4.7 | 0.123  | 19.8 | 54   |
| 1.20 | 0.94 | 0   | 18 | 0 | 27.5 | 1 | 2388.2 | 4.5 | 179 | 8.7 | 0.456  | 25.2 | 43.1 |
| 0.92 | 0.77 | 0   | 28 | 7 | 24.5 | 0 | 1692.6 | 4.8 | 255 | 5.8 | 0.042  | 24   | 49.3 |
| 1.23 | 0.96 | 0   | 29 | 2 | 29   | 0 | 1769.7 | 4.5 | 179 | 5.4 | 0.072  | 22.6 | 42.8 |

|      |      |       |    |    |      |   |        |     |     |      |        |      |       |
|------|------|-------|----|----|------|---|--------|-----|-----|------|--------|------|-------|
| 0.80 | 0.68 | 0     | 23 | 1  | 29   | 1 | 1249.3 | 4.6 | 164 | 5.7  | 0.118  | 33.2 | 35.4  |
| 0.90 | 0.88 | 0     | 29 | 1  | 26   | 0 | 1308.8 | 4.3 | 204 | 5.4  | 0.22   | 39.5 | 46.2  |
| 1.03 | 0.70 | 0     | 23 | 4  | 29   | 0 | 2249   | 4.2 | 171 | 6    | <0.012 | 26.1 | 42.9  |
| 0.82 | 0.68 | 0     | 20 | 1  | 27   | 0 | 2007.4 | 4.4 | 207 | 6.3  | 0.14   | 38.5 | 43.7  |
| 1.33 | 0.80 | 0     | 26 | 4  | 23   | 4 | 2670.8 | 4.6 | 175 | 10.6 | 0.172  | 27.3 | 58.3  |
| 1.29 | 1.00 | 0     | 25 | 4  | 27.5 | 1 | 2317.5 | 4.5 | 252 | 6.7  | 0.311  | 11.2 | 45.8  |
|      |      | 0     | 15 | 0  | 27.5 | 4 | 2549   | 4.5 | 213 | 5.6  | 0.046  | 31.7 | 33.3  |
| 1.30 | 0.97 | 0     | 28 | 0  | 29   | 0 | 2230.2 | 4.3 | 187 | 5.9  | 0.043  | 34.3 | 41    |
| 1.37 | 1.16 | 0     | 29 | 0  | 29.5 | 0 | 1469.4 | 4.5 | 227 | 6.7  | 0.147  | 20.3 | 8.8   |
| 1.20 | 1.00 | 0     | 29 | 1  | 28   | 0 | 1892.4 | 4.9 | 209 | 5.8  | 0.069  | 27.1 | 45.4  |
| 1.30 | 1.12 | 0     | 28 | 0  | 28.5 | 2 | 1508.7 | 4.5 | 201 | 6    | 0.132  | 35.1 | 37.8  |
| 1.24 | 0.95 | 0     | 29 | 0  | 27.5 | 1 | 1941.1 | 4.5 | 214 | 10.2 | 0.114  | 21.6 | 55.4  |
| 1.04 | 1.00 | 0     | 27 | 10 | 27.5 | 0 | 1930.2 | 4.5 | 220 | 5.9  | 0.023  | 22   | 26.3  |
| 0.90 | 0.78 | 0     | 29 | 1  | 27.5 | 0 | 2716.1 | 4.3 | 223 | 6.4  | 0.068  | 16   | 29.3  |
| 0.92 | 0.64 | 0     | 27 | 3  | 26   | 0 | 1812.4 | 4.5 | 206 | 6.5  | 0.507  | 20.9 | 68.5  |
| 1.04 | 0.76 | 0     | 29 | 3  | 27.5 | 0 | 2382.1 | 4.1 | 213 | 5.6  | 0.067  | 13.9 | 31.9  |
| 0.85 | 0.80 | 0     | 28 | 2  | 26.5 | 0 | 1578.8 | 4.6 | 183 | 6    | 0.046  | 16.5 | 41.2  |
| 0.93 | 0.77 | 0     | 18 | 1  | 26   | 3 | 2203.2 | 4.6 | 203 | 5.9  | 0.104  | 18.7 | 37.3  |
| 0.73 | 0.61 | 0     | 20 | 2  | 28   | 3 | 1292   | 4.5 | 152 | 5.6  | <0.012 | 20.6 | 48.8  |
| 1.00 | 0.79 | 0     | 25 | 1  | 27   | 2 | 2410.8 | 4.8 | 180 | 5.5  | 0.085  | 15.8 | 42.2  |
| 1.18 | 0.90 | -20.5 | 27 | 13 | 26   | 1 | 2159.7 | 4.5 | 205 | 6.1  | 0.064  | 19.3 | 31.4  |
| 0.80 | 0.73 | 0     | 29 | 1  | 26   | 4 | 1310.1 | 4.4 | 158 | 6.2  | 0.022  | 35.5 | 71.3  |
| 0.90 | 0.81 | 0     | 26 | 1  | 27.5 | 0 | 1730.4 | 4.1 | 194 | 6.5  | 0.843  | 23.7 | 64.2  |
| 0.86 | 0.72 | 0     | 21 | 2  | 27   | 0 | 1559.5 | 4.5 | 235 | 5.8  | 0.117  | 16.1 | 43.2  |
| 1.06 | 0.85 | 0     | 29 | 0  | 28.5 | 0 | 2257.9 | 4.6 | 238 | 6.3  | 0.066  | 19.8 | 80.5  |
| 1.02 | 0.89 | 0     | 25 | 0  | 29.5 | 1 | 4321.3 | 4.5 | 287 | 6    | 0.081  | 14.8 | 43    |
| 1.04 | 0.64 | 0     | 22 | 3  | 27   | 2 | 1139.5 | 4.5 | 169 | 5    | 0.261  | 30.1 | 53.7  |
| 1.08 | 0.73 | 0     | 29 | 1  | 25.5 | 0 | 1988.3 | 4.1 | 194 | 5.8  | 0.013  | 17.9 | 51.3  |
| 1.34 | 0.87 | 0     | 24 | 1  | 29.5 | 0 | 2552.5 | 4.4 | 163 | 6.2  | 0.23   | 27.3 | 26.1  |
| 1.05 | 0.91 | 0     | 29 | 1  | 29   | 3 | 1711.3 | 4.5 | 131 | 7.4  | 0.107  | 35.4 | 37.8  |
| 0.95 | 0.70 | 0     | 25 | 1  | 28.5 | 1 | 2080.4 | 4.4 | 287 | 9.3  | 0.144  | 20.6 | 13.8  |
| 1.16 | 0.89 | 0     | 28 | 2  | 29.5 | 1 | 2731.3 | 4.8 | 187 | 6.8  | 0.245  | 18.8 | 20    |
| 0.96 | 0.77 | 0     | 22 | 2  | 21.5 | 1 | 2770.6 | 4.6 | 175 | 7.9  | <0.012 | 21.5 | 29.2  |
| 0.87 | 0.76 | 0     | 22 | 2  | 27.5 | 2 | 1582.6 | 4.2 | 194 | 6.4  | 0.024  | 25   | 45.7  |
| 0.88 | 0.74 | 0     | 22 | 0  | 25.5 | 0 | 2111   | 4.5 | 167 | 5.6  | 0.196  | 36.3 | 33.3  |
| 0.83 | 0.67 | 0     | 20 | 1  | 27   | 0 | 2579.1 | 4.6 | 164 | 6.1  | 0.056  | 26.4 | 39.5  |
| 0.96 | 0.86 | 0     | 20 | 0  | 29   | 0 | 1957.8 | 4.5 | 181 | 5.4  | 0.016  | 24.2 | 35.4  |
| 0.83 | 0.75 | 0     | 19 | 0  | 29   | 3 | 3500.1 | 4.3 | 209 | 9.1  | 0.157  | 17.5 | 48.9  |
| 1.05 | 0.82 | 0     | 24 | 1  | 27.5 | 2 | 928.68 | 4.5 | 130 | 5.6  | 0.399  | 37.6 | 26.9  |
| 1.08 | 0.83 | 0     | 19 | 17 | 27   | 1 | 1931.7 | 4.8 | 188 | 5.9  | 0.81   | 23   | 106.1 |
| 1.11 | 0.93 | 0     | 28 | 0  | 27.5 | 0 | 1214.5 | 4.7 | 216 | 5.5  | <0.012 | 20   | 36.3  |
| 1.03 | 0.86 | 0     | 30 | 0  | 28.5 | 0 | 1918.1 | 4.6 | 190 | 5.3  | 0.038  | 36.6 | 43.5  |
| 1.05 | 0.81 | 0     | 30 | 0  | 29   | 0 | 1519.9 | 4.4 | 221 | 5.6  | 0.135  | 13.4 | 57.9  |
| 1.09 | 1.02 | 0     | 27 | 2  | 28   | 1 | 2167.1 | 5   | 133 | 8.9  | 0.07   | 20.2 | 24    |
| 0.86 | 0.70 | 0     | 27 | 1  | 28   | 0 | 1059.8 | 4.7 | 181 | 5.5  | 0.017  | 20.3 | 52.9  |
| 1.06 | 0.78 | 0     | 28 | 0  | 28.5 | 0 | 3642.8 | 4.7 | 209 | 5.7  | 0.021  | 15.1 | 56.7  |
| 1.30 | 0.94 | 0     | 24 | 8  | 23.5 | 0 | 2052.2 | 4.8 | 214 | 5.8  | 0.021  | 19.3 | 48.6  |
| 1.09 | 0.86 | 0     | 28 | 0  | 29.5 | 0 | 2630.6 | 4.9 | 210 | 5.8  | 0.624  | 41   | 34    |
| 0.99 | 0.78 | 0     | 26 | 1  | 29   | 1 | 1831.4 | 4.2 | 178 | 8.4  | 0.116  | 25.3 | 34.2  |
| 0.87 | 0.86 | 0     | 28 | 9  | 26.5 | 2 | 2743.5 | 4.7 | 209 | 6.5  | 0.443  | 25.7 | 23.4  |
| 1.08 | 0.96 | 0     | 30 | 1  | 26.5 | 1 | 1576.8 | 4.9 | 181 | 9.8  | 0.377  | 17.7 | 49.1  |
| 1.25 | 0.85 | 0     | 28 | 1  | 27.5 | 0 | 2671.1 | 4.7 | 218 | 6.9  | 0.458  | 29.3 | 36.4  |
| 1.06 | 0.78 | 0     | 28 | 1  | 26.5 | 0 | 2409.2 | 4.7 | 238 | 5.5  | <0.012 | 28.6 | 34.2  |
| 0.96 | 0.86 | 0     | 25 | 0  | 28.5 | 3 | 1911.4 | 4.3 | 148 | 6.7  | <0.012 | 24.1 | 31.5  |
| 1.12 | 0.82 | 0     | 29 | 1  | 28.5 | 1 | 1462.8 | 4.7 | 159 | 5.5  | 0.096  | 17.2 | 90.1  |
| 0.80 | 0.65 | 0     | 18 | 5  | 28   | 0 | 1561.4 | 4.6 | 186 | 5.8  | <0.012 | 30.9 | 40.9  |
| 0.79 | 0.77 | 0     | 23 | 0  | 29.5 | 2 | 2019.6 | 4.5 | 208 | 5.8  | 0.032  | 21.7 | 37.6  |
| 0.96 | 0.82 | 0     | 28 | 0  | 26.5 | 0 | 2261.8 | 4.4 | 188 | 5.8  | 0.818  | 24.9 | 64.4  |
| 0.93 | 0.74 | 0     | 26 | 1  | 27.5 | 0 | 3060   | 4.6 | 190 | 6.3  | 0.157  | 22.6 | 47.6  |
| 1.25 | 0.82 | 0     | 27 | 1  | 29   | 0 | 1500.2 | 4.4 | 208 | 6.5  | 0.161  | 13.9 | 59.1  |
| 1.08 | 0.93 | 0     | 28 | 9  | 26.5 | 0 | 3646.5 | 5   | 161 | 5.7  | 0.043  | 44.8 | 34.6  |
| 0.67 | 0.68 | 0     | 19 | 2  | 24   | 3 | 1848.8 | 4.5 | 256 | 5.7  | <0.012 | 19.3 | 60.5  |
| 1.33 | 1.10 | 0     | 28 | 0  | 28   | 1 | 1352.1 | 4.5 | 161 | 5    | 0.044  | 27.6 | 44.5  |
| 0.92 | 0.77 | -1    | 22 | 0  | 24.5 | 4 | 1156.2 | 4.6 | 104 | 6.9  | <0.012 | 21.2 | 35.1  |
| 1.08 | 0.89 | 0     | 23 | 0  | 27   | 3 | 1429.1 | 4.3 | 241 | 6    | 0.033  | 23.6 | 56.6  |
| 1.12 | 1.08 | 0     | 30 | 0  | 28.5 | 0 | 2483.5 | 5   | 189 | 5.8  | 0.308  | 31.8 | 23.4  |
| 1.15 | 0.88 | 0     | 25 | 1  | 30   | 0 | 2548.8 | 4.6 | 227 | 6.4  | 0.015  | 31.1 | 28.7  |
| 1.26 | 1.08 | 0     | 27 | 2  | 26.5 | 0 | 2140.8 | 4.5 | 187 | 5.8  | 0.095  | 32.9 | 25.4  |
| 1.07 | 0.89 | 0     | 29 | 1  | 24   | 0 | 2690.3 | 4.7 | 183 | 6    | 0.042  | 25.3 | 54    |
| 1.01 | 0.73 | 0     | 30 | 0  | 27   | 2 | 3061.5 | 4.8 | 181 | 7.2  | 0.015  | 30.2 | 62.9  |
| 0.93 | 0.78 | 0     | 19 | 1  | 27   | 1 | 2672.2 | 4.2 | 199 | 7    | 0.916  | 28.8 | 37.5  |
| 1.00 | 0.76 | 0     | 22 | 2  | 23.5 | 1 | 2122.5 | 4.6 | 191 | 4.9  | 0.024  | 31   | 32.5  |



|      |      |   |    |    |      |   |        |     |     |     |        |      |       |
|------|------|---|----|----|------|---|--------|-----|-----|-----|--------|------|-------|
| 1.20 | 1.02 | 0 | 27 | 0  | 27   | 1 | 2537.9 | 4.4 | 202 | 6.7 | 0.075  | 24.5 | 70.6  |
| 0.92 | 0.67 | 0 | 18 | 1  | 25   | 2 | 2208.1 | 5   | 171 | 5.5 | 0.131  | 19.9 | 18.9  |
| 1.04 | 0.84 | 0 | 29 | 0  | 25.5 | 0 | 3050.7 | 4.3 | 223 | 4.6 | 0.1    | 26.6 | 65.2  |
| 0.85 | 0.80 | 0 | 29 | 0  | 28   | 0 | 1750.8 | 4.9 | 280 | 5.9 | 0.041  | 27   | 34    |
| 0.91 | 0.69 | 0 | 29 | 0  | 25   | 2 | 2402.1 | 4.8 | 220 | 5.6 | 0.018  | 30.6 | 22    |
| 1.14 | 0.91 | 0 | 29 | 5  | 29   | 1 | 1582.2 | 4.7 | 153 | 5.5 | <0.012 | 30.9 | 56    |
| 1.17 | 0.80 | 0 | 20 | 1  | 27   | 0 | 1659.7 | 4.4 | 182 | 6   | <0.012 | 27.7 | 34    |
| 0.71 | 0.66 | 0 | 22 | 1  | 28.5 | 0 | 3138.8 | 4.6 | 204 | 6   | 0.305  | 21.6 | 39.7  |
| 1.00 | 0.71 | 0 | 11 | 0  | 28.5 | 0 | 2302   | 4.6 | 239 | 6.4 | <0.012 | 17.6 | 56.5  |
| 1.11 | 0.76 | 0 | 30 | 0  | 29   | 0 | 2729.6 | 4.8 | 231 | 5.8 | 0.075  | 21.2 | 42    |
| 1.27 | 1.19 | 0 | 24 | 3  | 25.5 | 1 | 889.35 | 4.7 | 218 | 5.3 | 3.303  | 42.9 | 22.9  |
| 0.97 | 0.93 | 0 | 26 | 0  | 29   | 1 | 1498   | 5.1 | 180 | 5.8 | 0.017  | 43.8 | 22.5  |
| 0.86 | 1.03 | 0 | 29 | 0  | 27   | 1 | 1799.7 | 4.6 | 178 | 5.7 | 0.018  | 29.4 | 25.2  |
|      | 0.79 | 0 | 26 | 0  | 25.5 | 0 | 1891.5 | 4.6 | 235 | 5.8 | <0.012 | 18.2 | 37.5  |
| 0.87 | 0.72 | 0 | 15 | 0  | 30   | 0 | 2540.3 | 4.7 | 204 | 5.8 | 0.042  | 17.5 | 52.3  |
| 0.85 | 0.76 | 0 | 27 | 2  | 26.5 | 0 | 1480.5 | 4.6 | 209 | 6.3 | <0.012 | 18.9 | 47.4  |
| 0.84 | 0.78 | 0 | 28 | 5  | 26.5 | 0 | 1898.6 | 4.4 | 197 | 5.9 | 0.252  | 26.5 | 30.6  |
| 0.80 | 0.72 | 0 | 21 | 0  | 28   | 2 | 1889.3 | 4.7 | 180 | 5.6 | 0.016  | 25   | 56.3  |
| 0.96 | 0.87 | 0 | 23 | 0  | 27.5 | 2 | 2282.9 | 4.4 | 190 | 6.1 | 0.114  | 22.5 | 67.8  |
| 0.72 | 0.69 | 0 | 26 | 1  | 19   | 2 | 1258.4 | 4.5 | 151 | 5.6 | <0.012 | 15.9 | 44.3  |
| 0.75 | 0.66 | 0 | 14 | 1  | 27.5 | 2 | 1558.6 | 4.2 | 199 | 5.6 | <0.012 | 14.2 | 37    |
| 0.85 | 0.73 | 0 | 27 | 2  | 26   | 2 | 1438.1 | 4.3 | 211 | 5.8 | 0.569  | 24.4 | 25.6  |
| 1.13 | 0.94 | 0 | 21 | 0  | 28.5 | 0 | 1068.2 | 4.5 | 161 | 6   | 1.232  | 28.4 | 61.2  |
| 1.17 | 0.81 | 0 | 28 | 2  | 25.5 | 2 | 1892.2 | 4.2 | 120 | 6.4 | 0.561  | 41.6 | 13.2  |
| 0.99 | 0.87 | 0 | 20 | 0  | 27.5 | 1 | 2339.3 | 4.9 | 158 | 5.9 | <0.012 | 43.8 | 42    |
| 1.07 | 1.06 | 0 | 28 | 0  | 25.5 | 0 | 1532.1 | 4.4 | 191 | 5.3 | 0.283  | 25.9 | 75.8  |
| 1.15 | 0.97 | 0 | 29 | 12 | 27   | 0 | 1310.4 | 3.6 | 162 | 4.5 | 0.055  | 38.1 | 35.8  |
| 0.85 | 0.74 | 0 | 28 | 0  | 28.5 | 0 | 1468.6 | 4.7 | 231 | 5.7 | <0.012 | 19.4 | 61.8  |
| 0.71 | 0.73 | 0 | 25 | 6  | 23.5 | 2 | 1751.7 | 4.5 | 200 | 5.7 | <0.012 | 26.5 | 54.2  |
| 0.83 | 0.82 | 0 | 21 | 1  | 25   | 0 | 1887.7 | 5   | 136 | 6   | 0.029  | 36.6 | 23.6  |
| 1.11 | 0.91 | 0 | 21 | 3  | 27.5 | 3 | 1633.6 | 4.5 | 154 | 6.8 | 2.21   | 34.2 | 32.1  |
| 0.98 | 0.85 | 0 | 29 | 0  | 28.5 | 1 | 2241.1 | 5   | 144 | 7.3 | 0.069  | 34.4 | 24.9  |
| 1.30 | 0.87 | 0 | 22 | 0  | 26.5 | 0 | 2157.5 | 4.7 | 227 | 5.8 | 0.265  | 31.8 | 30.9  |
| 1.20 | 0.83 | 0 | 28 | 6  | 23.5 | 0 | 2008   | 4.8 | 220 | 5.9 | <0.012 | 31.6 | 33.8  |
| 1.30 | 0.93 | 0 | 29 | 0  | 27   | 2 | 1799.5 | 4.3 | 120 | 6   | 0.042  | 30.5 | 73.7  |
| 0.91 | 0.84 | 0 | 19 | 2  | 28.5 | 0 | 3032.8 | 4.5 | 206 | 6   | 0.076  | 34.3 | 30.7  |
| 0.98 | 0.76 | 0 | 20 | 1  | 27   | 0 | 1389.5 | 4.2 | 184 | 6   | 0.306  | 25.1 | 57.3  |
|      |      | 0 | 27 | 0  | 25.5 | 0 | 2927.5 | 5   | 349 | 5.9 | 0.122  | 18.1 | 20.4  |
| 0.98 | 0.71 | 0 | 26 | 2  | 29   | 0 | 2249.5 | 4.6 | 219 | 7   | 0.042  | 17.3 | 37.7  |
| 0.82 | 0.78 | 0 | 26 | 1  | 23.5 | 3 | 1581.7 | 5   | 184 | 5.9 | 0.481  | 22.7 | 21.9  |
| 0.77 | 0.71 | 0 | 18 | 1  | 22   | 3 | 1732.4 | 4.4 | 158 | 6.8 | 0.386  | 18.3 | 19.3  |
| 1.24 | 0.94 | 0 | 19 | 3  | 26   | 2 | 1729.3 | 4.5 | 210 | 6.3 | 0.246  | 29.1 | 26.8  |
| 0.92 | 0.79 | 0 | 23 | 1  | 28   | 2 | 1738.9 | 4.5 | 190 | 5.9 | <0.012 | 31.1 | 30.4  |
| 1.16 | 0.73 | 0 | 24 | 0  | 28.5 | 0 | 2528.4 | 4.7 | 254 | 6.6 | 0.074  | 24.1 | 35.5  |
| 1.07 | 0.61 | 0 | 21 | 1  | 24   | 0 | 1368.6 | 4.7 | 168 | 6   | <0.012 | 18.4 | 51.4  |
| 1.00 | 0.68 | 0 | 25 | 3  | 26.5 | 2 | 2169.4 | 4.7 | 198 | 5.9 | 0.04   | 17.4 | 40.7  |
| 0.98 | 0.76 | 0 | 11 | 2  | 25.5 | 3 | 1699.2 | 4.5 | 151 | 6.3 | 0.029  | 27.8 | 35.7  |
| 0.91 | 0.63 | 0 | 20 | 2  | 28.5 | 2 | 1512   | 4.7 | 182 | 5.3 | 0.012  | 20   | 39.1  |
| 1.15 | 1.10 | 0 | 29 | 1  | 28   | 1 | 2077.6 | 4.9 | 227 | 6.9 | 0.041  | 33.2 | 18    |
| 1.36 | 1.18 | 0 | 22 | 1  | 27.5 | 1 | 2840.2 | 4.5 | 190 | 8.3 | 0.205  | 23.2 | 43.9  |
| 1.30 | 1.04 | 0 | 22 | 2  | 23.5 | 3 | 1701   | 5   | 148 | 9.6 | 0.026  | 31.7 | 183.5 |
| 1.10 | 0.98 | 0 | 30 | 0  | 27   | 1 | 3526.9 | 5   | 172 | 8.3 | 0.023  | 31.2 | 24.3  |
| 1.01 | 0.85 | 0 | 28 | 1  | 25   | 0 | 2401.9 | 4.6 | 235 | 6.2 | 0.097  | 21.5 | 39.4  |
| 1.09 | 0.86 | 0 | 27 | 0  | 23   | 0 | 1642.1 | 4.6 | 256 | 5.8 | 0.059  | 23.8 | 40.7  |
| 1.10 | 0.82 | 0 | 27 | 1  | 29   | 1 | 1928.1 | 4.9 | 107 | 6.1 | 0.032  | 17.1 | 29.5  |
| 0.77 | 0.77 | 0 | 22 | 0  | 24.5 | 0 | 1887.4 | 4.3 | 247 | 5.8 | 0.635  | 22.2 | 56.2  |
| 1.43 | 1.34 | 0 | 21 | 0  | 27.5 | 1 | 1659   | 4.9 | 162 | 8.2 | <0.012 | 33.1 | 34.4  |
| 0.95 | 0.73 | 0 | 27 | 0  | 28   | 1 | 2088.9 | 4.8 | 209 | 9.6 | 0.1    | 22.8 | 27.4  |
| 1.03 | 1.04 | 0 | 28 | 2  | 28   | 0 | 3075.3 | 4.4 | 209 | 6.1 | 0.383  | 27.9 | 44.4  |
| 1.04 | 0.91 | 0 | 30 | 0  | 26.5 | 0 | 1860.2 | 4.8 | 165 | 5.7 | 0.05   | 27.6 | 29.3  |
| 1.03 | 0.84 | 0 | 25 | 0  | 28   | 0 | 2329.8 | 4.6 | 146 | 5   | 0.012  | 24.3 | 59.3  |
| 1.12 | 0.62 | 0 | 29 | 1  | 29.5 | 0 | 2137.3 | 4.4 | 213 | 5.3 | 0.046  | 19.4 | 32.9  |
| 1.23 | 0.86 | 0 | 26 | 1  | 28   | 0 | 819.55 | 4.4 | 179 | 6.4 | 0.207  | 17.2 | 41.6  |
| 1.38 | 0.81 | 0 | 16 | 0  | 28   | 3 | 2397.1 | 5   | 156 | 6.8 | 0.406  | 29.1 | 40.6  |
| 0.86 | 0.70 | 0 | 25 | 1  | 27   | 1 | 1691.6 | 4.5 | 144 | 5.7 | 0.045  | 21.2 | 33.8  |
|      |      | 0 | 29 | 1  | 29.5 | 0 | 3030.7 | 4.4 | 209 | 6.1 | 0.022  | 24.6 | 42.2  |
| 0.80 | 0.71 | 0 | 16 | 4  | 27.5 | 2 | 2421.9 | 4.2 | 216 | 6.2 | 0.066  | 28.3 | 51.4  |
| 0.94 | 0.83 | 0 | 27 | 1  | 26.5 | 1 | 2481.5 | 4.6 | 221 | 5.6 | 0.113  | 20.9 | 19.2  |
| 0.76 | 0.76 | 0 | 28 | 5  | 25   | 2 | 1500.9 | 4.6 | 218 | 5.3 | 0.602  | 15.7 | 52.3  |
|      | 0.70 | 0 | 28 | 0  | 28.5 | 2 | 1669.7 | 4.3 | 162 | 5.5 | 0.044  | 31.8 | 90.6  |
| 0.97 | 0.95 | 0 | 21 | 1  | 26.5 | 0 | 1361.4 | 4.5 | 167 | 6.8 | 0.109  | 17.5 | 42.9  |
| 1.10 | 0.94 | 0 | 24 | 14 | 24   | 0 | 3472   | 4.4 | 141 | 6.4 | 0.015  | 39.3 | 24    |

|      |      |      |    |    |      |   |        |     |     |     |        |      |       |
|------|------|------|----|----|------|---|--------|-----|-----|-----|--------|------|-------|
| 1.06 | 0.71 | 0    | 26 | 11 | 24.5 | 3 | 2179.3 | 4.4 | 170 | 5.8 | 0.041  | 16.8 | 77    |
| 1.00 | 0.73 | 0    | 27 | 0  | 26   | 0 | 2217.1 | 4.4 | 191 | 5.9 | 0.03   | 37   | 35.2  |
| 1.04 | 0.89 | 0    | 28 | 3  | 25   | 0 | 2447.8 | 4.5 | 198 | 5.8 | 0.046  | 13.6 | 40.2  |
| 1.07 | 0.72 | 0    | 27 | 2  | 22.5 | 0 | 2206.6 | 4.4 | 171 | 6.1 | 0.012  | 23.5 | 38.1  |
| 0.96 |      | 0    | 30 | 2  | 26   | 1 | 842.24 | 4.4 | 185 | 5   | 1.373  | 18.8 | 51.7  |
| 1.34 | 1.03 | 0    | 28 | 5  | 25   | 1 | 1652.5 | 4.6 | 194 | 5.9 | 0.026  | 30.6 | 40.6  |
| 1.36 | 0.88 | 0    | 29 | 0  | 29   | 0 | 2058.4 | 4.7 | 175 | 6.2 | 0.453  | 20   | 32.9  |
| 1.26 | 0.78 | 0    | 30 | 0  | 29   | 0 | 1498.1 | 4.9 | 179 | 5.8 | 0.085  | 21.2 | 60.9  |
| 1.09 | 0.79 | 0    | 27 | 0  | 27   | 0 | 1470.6 | 4.7 | 172 | 5.8 | 0.016  | 12.4 | 46.3  |
| 1.29 | 0.93 | 0    | 25 | 0  | 28   | 1 | 3421.7 | 4.2 | 195 | 5.8 | 0.074  | 23   | 21.3  |
| 1.08 | 0.84 | 0    | 30 | 1  | 26.5 | 1 | 2702.7 | 4.5 | 161 | 5.4 | 0.095  | 20.8 | 49.3  |
| 0.91 | 0.67 | 0    | 27 | 0  | 22   | 2 | 2636.7 | 4.5 | 180 | 6.3 | 0.042  | 18.1 | 32.9  |
| 1.55 | 1.33 | 0    | 18 | 0  | 26   | 2 | 1639.3 | 4.4 | 179 | 5.7 | 0.033  | 49.8 | 26.7  |
| 0.95 | 0.95 | 0    | 29 | 0  | 27   | 0 | 2002.8 | 4.9 | 236 | 6.1 | 0.11   | 26.1 | 37.4  |
| 0.84 | 0.75 | 0    | 20 | 0  | 26.5 | 1 | 2396.8 | 4.8 | 173 | 7.2 | 0.089  | 27.7 | 40.1  |
| 1.01 | 0.76 | 0    | 28 | 0  | 28   | 0 | 2609.7 | 4.7 | 204 | 5.8 | 0.194  | 19.2 | 25.6  |
| 0.88 | 0.89 | 0    | 24 | 0  | 27   | 0 | 1339   | 4.8 | 202 | 6   | 0.024  | 38.5 | 13.8  |
| 1.08 | 0.78 | 0    | 27 | 6  | 26   | 0 | 1687.8 | 5.1 | 170 | 6.1 | 0.024  | 22.2 | 29.7  |
| 1.22 | 0.88 | 0    | 17 | 0  | 28.5 | 2 | 1401.6 | 4.4 | 183 | 5.7 | 0.022  | 26.9 | 31.9  |
| 0.88 | 0.67 | 0    | 27 | 0  | 27   | 0 | 1601.1 | 4.5 | 207 | 5.9 | 0.013  | 20   | 39.8  |
| 0.93 | 0.73 | 0    | 29 | 0  | 25.5 | 2 | 1719.8 | 4.6 | 210 | 6.2 | 0.014  | 28.3 | 41.3  |
| 0.98 | 0.82 | 0    | 26 | 7  | 24.5 | 2 | 1971   | 4.6 | 235 | 6.1 | 0.25   | 23.4 | 60.9  |
| 1.02 | 0.86 | 0    | 27 | 1  | 26.5 | 2 | 1307.8 | 4.6 | 189 | 5.4 | 0.032  | 32.9 | 37.5  |
| 0.78 | 0.66 | 0    | 21 | 7  | 23   | 3 | 1408.8 | 4.5 | 197 | 5.6 | 0.131  | 23.3 | 79.5  |
| 0.80 | 0.64 | 0    | 26 | 0  | 25   | 0 | 2178   | 4.7 | 223 | 5.7 | 0.869  | 19.9 | 27    |
| 1.19 | 1.00 | 0    | 21 | 4  | 27   | 2 | 1549.1 | 4.6 | 181 | 5.8 | 2.148  | 26.3 | 25.9  |
| 0.86 | 0.94 | 0    | 25 | 0  | 25   | 2 | 2119.5 | 4.2 | 218 | 6.3 | <0.012 | 16.2 | 44.3  |
| 1.02 | 0.75 | 0    | 25 | 0  | 26   | 0 | 2491.9 | 4.6 | 234 | 5.9 | 0.204  | 27.9 | 37.9  |
| 1.36 | 1.00 | 0    | 29 | 0  | 28   | 0 | 1841.6 | 4.7 | 195 | 5.8 | 0.055  | 37.3 | 30.8  |
| 0.89 | 0.75 | 0    | 30 | 0  | 27   | 0 | 1752.2 | 4.5 | 146 | 6.1 | 0.099  | 24.7 | 35.7  |
| 1.34 | 1.09 | 0    | 29 | 0  | 27   | 0 | 1909.9 | 4.6 | 180 | 5.7 | 0.044  | 30.6 | 19.2  |
| 1.22 | 0.99 | 0    | 26 | 1  | 24.5 | 0 | 959.37 | 4.4 | 166 | 5.3 | 0.194  | 26.4 | 52.3  |
| 1.01 | 0.92 | 0    | 30 | 0  | 26   | 1 | 2260.1 | 4.5 | 219 | 6.7 | 0.202  | 20.4 | 47.8  |
| 0.91 | 0.63 | 0    | 19 | 1  | 23   | 2 | 1679.6 | 4.5 | 165 | 5.7 | 0.818  | 21.8 | 44    |
| 1.18 | 0.95 | 0    | 28 | 0  | 29   | 0 | 1597.2 | 4.5 | 200 | 6   | 0.199  | 32.4 | 29.3  |
| 1.23 | 0.98 | 0    | 30 | 0  | 27   | 0 | 2140.7 | 4.6 | 209 | 5.7 | 0.038  | 20.6 | 29.2  |
| 0.84 | 0.74 | 0    | 16 | 0  | 26   | 0 | 3489.4 | 4.9 | 182 | 6.4 | 0.024  | 21.6 | 43.3  |
| 1.08 | 1.06 | 0    | 25 | 0  | 29   | 1 | 1382.1 | 4.7 | 204 | 6.7 | 0.027  | 14.5 | 46.2  |
| 1.03 | 0.80 | 0    | 26 | 0  | 25   | 1 | 3483   | 4.7 | 128 | 6   | 0.16   | 23.6 | 79.2  |
| 1.19 | 0.89 | 0    | 29 | 3  | 24   | 0 | 2221   | 4.7 | 169 | 5   | 0.08   | 22   | 121.4 |
| 0.95 | 0.84 | 0    | 27 | 0  | 29   | 0 | 2200   | 4.7 | 189 | 6.1 | 0.038  | 25   | 49.9  |
| 1.01 | 0.81 | 0    | 26 | 0  | 28.5 | 1 | 3490.6 | 4.5 | 198 | 5.9 | 0.084  | 19.5 | 37.8  |
| 0.65 | 0.66 | 0    | 28 | 0  | 27   | 0 | 1868.4 | 4.3 | 223 | 6.1 | <0.012 | 26   | 50.9  |
| 1.31 | 0.99 | 0    | 22 | 0  | 29   | 2 | 1868.4 | 4.6 | 152 | 7.3 | 0.031  | 44   | 29.8  |
| 1.09 | 0.76 | 0    | 26 | 0  | 28.5 | 1 | 2089.8 | 4.5 | 217 | 5.9 | 0.08   | 19.5 | 73.4  |
| 1.28 | 1.07 | 0    | 23 | 2  | 28   | 1 | 1409.9 | 4.6 | 212 | 7.1 | 0.351  | 17.2 | 52.4  |
| 0.84 | 0.74 | 0    | 30 | 4  | 27   | 2 | 1697.8 | 4.3 | 233 | 5.9 | 1.013  | 25.4 | 32.8  |
| 0.62 | 0.53 | -2.5 | 6  | 4  | 25   | 3 | 1038.6 | 4.3 | 156 | 6.9 | <0.012 | 21.1 | 38.8  |
| 0.76 | 0.54 | -1   | 16 | 0  | 24   | 0 | 1161.3 | 4.7 | 176 | 5.4 | 0.078  | 26.9 | 23.4  |
| 0.89 | 0.83 | 0    | 24 | 0  | 26.5 | 0 | 1570   | 4.3 | 166 | 5.6 | 1.156  | 55.2 | 27.1  |
| 0.92 | 0.74 | 0    | 25 | 2  | 27   | 0 | 2349.5 | 4.3 | 156 | 5.4 | <0.012 | 35   | 27.7  |
| 0.97 | 0.83 | 0    | 26 | 1  | 28   | 3 | 1861   | 4.5 | 182 | 7.3 | 0.467  | 22.7 | 21.6  |
| 0.71 | 0.62 | 0    | 29 | 0  | 25.5 | 3 | 1478.5 | 4.4 | 197 | 6.4 | 0.034  | 17.6 | 29.3  |
| 0.74 | 0.63 | 0    | 29 | 1  | 25   | 3 | 2672.4 | 5   | 230 | 6   | 0.048  | 21.4 | 22.7  |
| 1.11 | 0.86 | 0    | 28 | 0  | 29   | 0 | 1438.2 | 4.6 | 194 | 5.7 | 0.018  | 17.2 | 59.2  |
| 1.06 | 1.13 | 0    | 29 | 0  | 29   | 0 | 1989   | 4.5 | 204 | 5.9 | 0.183  | 21   | 42.9  |
| 1.12 | 0.98 | 0    | 27 | 0  | 26   | 4 | 1863.8 | 4.2 | 118 | 7.3 | 0.266  | 23   | 34.8  |
| 1.08 | 0.95 | 0    | 19 | 1  | 28   | 2 | 3033.1 | 4.2 | 207 | 6   | 0.245  | 30.2 | 20.5  |
| 1.13 | 0.84 | 0    | 27 | 2  | 25.5 | 0 | 2037.4 | 4.9 | 185 | 6.2 | 0.99   | 15.4 | 42.9  |
| 0.75 | 0.79 | 0    | 29 | 0  | 26.5 | 0 | 2032.2 | 4.7 | 144 | 6.3 | 0.312  | 9.9  | 47.1  |
|      |      | 0    | 22 | 14 | 25   | 2 | 2552.7 | 4.3 | 186 | 5.7 | 0.263  | 21.3 | 27.1  |
|      | 0.77 | 0    | 25 | 0  | 25.5 | 3 | 1862.9 | 4.3 | 184 | 5.8 | 0.07   | 21.9 | 42.7  |
| 1.20 | 0.93 | 0    | 25 | 0  | 27.5 | 0 | 2349.9 | 5.2 | 213 | 5.3 | 0.058  | 27.4 | 34.5  |
| 0.90 | 0.73 | 0    | 28 | 1  | 25.5 | 1 | 2803   | 4.5 | 247 | 5.6 | 0.084  | 26.2 | 26.6  |
| 1.27 | 1.13 | 0    | 30 | 0  | 28   | 0 | 2070.3 | 4.4 | 192 | 5.8 | 0.834  | 21.3 | 33.3  |
| 0.90 | 0.70 | 0    | 25 | 1  | 23.5 | 0 | 1250.8 | 4.7 | 155 | 6   | 0.569  | 27.7 | 14.8  |
| 1.32 | 0.90 | 0    | 25 | 1  | 27   | 1 | 2088.5 | 4.8 | 194 | 6.3 | 0.091  | 22.4 | 27.5  |
| 0.88 | 0.67 | 0    | 26 | 0  | 27   | 2 | 1667.8 | 4.6 | 181 | 5.9 | 0.12   | 23.5 | 42    |
| 0.85 | 0.66 | 0    | 22 | 0  | 26   | 2 | 1882.4 | 4.5 | 225 | 5.9 | <0.012 | 13.7 | 33.7  |
| 0.99 | 0.75 | 0    | 27 | 0  | 28.5 | 0 | 1331.8 | 4.7 | 135 | 6.2 | 0.162  | 22.6 | 35.4  |
| 1.00 | 0.84 | 0    | 22 | 0  | 27.5 | 0 | 2599.1 | 4.7 | 256 | 5.8 | 0.179  | 19.3 | 21    |
| 1.33 | 1.26 | 0    | 29 | 0  | 27   | 3 | 1339.8 | 4.5 | 161 | 4.7 | 0.038  | 33.1 | 45.7  |

|      |      |    |    |    |      |   |        |     |     |      |        |      |      |
|------|------|----|----|----|------|---|--------|-----|-----|------|--------|------|------|
| 1.02 | 0.80 | 0  | 21 | 1  | 28   | 0 | 4747.6 | 4.8 | 221 | 5.7  | 0.07   | 23.2 | 33   |
| 0.94 | 0.74 | 0  | 16 | 5  | 28.5 | 3 | 2317.3 | 4.4 | 209 | 7.6  | 0.036  | 14.8 | 40.2 |
|      | 0.69 | 0  | 17 | 0  | 28   | 2 | 2663.1 | 4.7 | 217 | 6.4  | 1.173  | 22.3 | 28.3 |
| 1.24 | 0.91 | 0  | 25 | 0  | 29   | 1 | 2067.9 | 4.7 | 195 | 8.2  | 0.028  | 17.9 | 16.2 |
| 0.83 | 0.83 | 0  | 19 | 0  | 25.5 | 0 | 2023.5 | 4.5 | 177 | 5.6  | 0.428  | 30   | 77.1 |
| 1.12 | 0.95 | 0  | 21 | 1  | 29.5 | 3 | 1550.3 | 4.9 | 162 | 6.1  | 0.406  | 22.3 | 51.2 |
| 0.96 | 0.88 | 0  | 27 | 1  | 29.5 | 0 | 4020.5 | 4.7 | 170 | 6.7  | 0.712  | 17.5 | 44.6 |
| 0.84 | 0.74 | 0  | 29 | 7  | 26.5 | 0 | 601.44 | 4.6 | 177 | 4.9  | 0.569  | 31.1 | 35.1 |
| 0.97 | 1.02 | 0  | 27 | 1  | 26.5 | 0 | 3197.5 | 4.9 | 208 | 6.4  | <0.012 | 22.8 | 17.2 |
| 0.82 | 0.63 | 0  | 29 | 0  | 27.5 | 0 | 3318.9 | 4.5 | 202 | 5.8  | <0.012 | 14.6 | 39.2 |
| 1.55 | 1.16 | 0  | 22 | 0  | 28.5 | 1 | 2441.1 | 4.5 | 162 | 14.6 | <0.012 | 29   | 48.3 |
| 0.83 | 0.67 | 0  | 23 | 5  | 25.5 | 2 | 1759.9 | 4.5 | 190 | 5.5  | 0.015  | 22.4 | 35   |
| 0.88 | 0.76 | 0  | 27 | 0  | 26.5 | 2 | 869.4  | 4.5 | 197 | 5.8  | 0.052  | 26.8 | 78.3 |
| 1.02 | 0.77 | 0  | 27 | 2  | 26.5 | 1 | 1596.6 | 4.5 | 199 | 6    | 0.025  | 25.8 | 38.4 |
| 1.05 | 0.90 | 0  | 20 | 3  | 26   | 2 | 2328.5 | 4.5 | 225 | 9.7  | 0.226  | 17.5 | 37.5 |
| 1.08 | 0.95 | 0  | 25 | 0  | 28   | 0 | 3403.8 | 5   | 301 | 5.7  | 0.368  | 27.3 | 20.2 |
| 1.16 | 0.81 | 0  | 26 | 1  | 28   | 0 | 1380   | 4.5 | 220 | 6.1  | 0.058  | 20.4 | 54.6 |
| 1.75 | 1.13 | 0  | 25 | 0  | 29   | 1 | 2208.3 | 4.8 | 167 | 6.3  | 0.131  | 30   | 30   |
| 1.10 | 0.94 | 0  | 25 | 1  | 27   | 0 | 2312.5 | 4.7 | 249 | 5.8  | 0.542  | 22.5 | 39.3 |
| 1.10 | 0.98 | 0  | 27 | 0  | 27.5 | 1 | 2221.3 | 5   | 172 | 6.1  | 0.1    | 29.3 | 21.1 |
| 0.93 | 0.72 | 0  | 19 | 7  | 27.5 | 1 | 2898.8 | 4.9 | 202 | 5.9  | 0.159  | 23.5 | 41.3 |
| 0.84 | 0.92 | 0  | 21 | 2  | 28   | 0 | 2208.1 | 4.3 | 146 | 6.2  | 0.037  | 20.6 | 47.9 |
| 0.89 | 0.64 | 0  | 25 | 3  | 27.5 | 2 | 1630.6 | 4.6 | 212 | 6.1  | 0.061  | 14.3 | 31.4 |
| 0.91 | 0.83 | 0  | 19 | 2  | 29.5 | 3 | 2669.3 | 4.9 | 235 | 7.1  | 0.101  | 17.1 | 34.3 |
| 0.73 | 0.73 | 0  | 24 | 1  | 25.5 | 0 | 2068   | 4.5 | 152 | 5.9  | 0.04   | 13.2 | 58.4 |
| 0.79 | 0.60 | 0  | 14 | 1  | 29   | 2 | 2877   | 4.5 | 155 | 6.2  | 0.377  | 19.4 | 57.5 |
| 0.86 | 0.89 | 0  | 23 | 2  | 28.5 | 2 | 1300.5 | 4.5 | 218 | 5.7  | 0.38   | 15.1 | 16.7 |
| 1.02 | 0.74 | 0  | 24 | 2  | 24   | 2 | 2703.1 | 4.9 | 223 | 5.8  | 0.088  | 28.6 | 43   |
| 0.88 | 0.86 | 0  | 29 | 6  | 26   | 1 | 1662.4 | 4.8 | 222 | 5.2  | 0.229  | 28.2 | 27.3 |
| 0.86 | 0.84 | 0  | 30 | 4  | 22   | 0 | 1639.7 | 4.6 | 256 | 5.6  | 0.393  | 17.8 | 17.9 |
| 1.17 | 0.91 | 0  | 27 | 1  | 27.5 | 2 | 1601.4 | 4.7 | 348 | 5.3  | 0.512  | 24.1 | 40.6 |
| 1.25 | 0.99 | 0  | 28 | 2  | 28.5 | 0 | 2278.2 | 4.8 | 164 | 6    | 0.085  | 30.1 | 24.8 |
| 1.12 | 0.94 | 0  | 29 | 0  | 28   | 0 | 1840.2 | 4.4 | 182 | 5.4  | 0.049  | 25.6 | 33   |
| 0.94 | 0.87 | 0  | 28 | 0  | 25.5 | 1 | 1602.3 | 4.5 | 178 | 5.7  | <0.012 | 22.5 | 53.2 |
| 0.77 | 0.82 | 0  | 28 | 1  | 27.5 | 0 | 3338.6 | 4.7 | 261 | 6.2  | 0.102  | 17.8 | 32.7 |
| 0.82 | 0.74 | 0  | 26 | 0  | 28.5 | 1 | 1568.5 | 4.6 | 197 | 5.7  | 0.026  | 15.8 | 52.6 |
| 0.95 | 0.81 | 0  | 27 | 0  | 27.5 | 3 | 1431.1 | 5   | 214 | 5.7  | 0.984  | 34.2 | 35.4 |
| 1.01 | 0.80 | 0  | 24 | 0  | 26.5 | 0 | 1862.6 | 4.8 | 165 | 5.5  | 0.584  | 24.1 | 22.7 |
| 0.91 | 0.74 | 0  | 29 | 2  | 27   | 3 | 1761.7 | 4.7 | 205 | 7.4  | <0.012 | 26.6 | 35.6 |
| 0.89 | 0.80 | 0  | 20 | 0  | 26.5 | 3 | 1238   | 4.3 | 211 | 5.3  | 0.084  | 22.8 | 42.5 |
| 1.19 | 0.82 | 0  | 20 | 1  | 28.5 | 0 | 2422.7 | 4.4 | 226 | 5.3  | 0.518  | 22.2 | 26.4 |
| 0.84 | 0.73 | 0  | 29 | 0  | 29.5 | 0 | 2320.7 | 4.5 | 235 | 6.4  | 0.108  | 26.2 | 20.9 |
| 1.19 | 0.95 | 0  | 26 | 0  | 29   | 0 | 841.5  | 4.8 | 188 | 4.9  | 0.034  | 19.9 | 37.5 |
| 1.10 | 0.88 | 0  | 28 | 0  | 27.5 | 0 | 2580.5 | 4.8 | 281 | 5.8  | 0.019  | 16   | 37.2 |
| 0.80 | 0.62 | 0  | 28 | 1  | 26.5 | 3 | 910.14 | 4.6 | 143 | 5.9  | 0.091  | 17.5 | 57.5 |
| 1.73 | 0.80 | 0  | 26 | 0  | 27.5 | 2 | 1550.3 | 4.5 | 186 | 5.8  | 0.419  | 14.4 | 61.4 |
| 0.87 | 0.60 | 0  | 25 | 4  | 26.5 | 0 | 3283.1 | 4.4 | 228 | 5.3  | 0.052  | 6.9  | 23.7 |
| 1.01 | 0.71 | 0  | 17 | 9  | 27.5 | 1 | 1221.1 | 4.5 | 188 | 5.9  | <0.012 | 20.8 | 42.6 |
| 0.94 | 1.02 | 0  | 28 | 0  | 29   | 0 | 2032   | 4.6 | 238 | 5.4  | 0.217  | 26.3 | 27.8 |
| 0.93 | 0.89 | 0  | 27 | 1  | 29   | 0 | 2258   | 4.6 | 159 | 5.8  | 0.029  | 16.7 | 53.7 |
| 1.12 | 1.03 | 0  | 28 | 0  | 28   | 3 | 1619.1 | 4.7 | 155 | 6.9  | 1.294  | 23.1 | 25.4 |
| 0.86 | 0.73 | 0  | 25 | 1  | 27.5 | 0 | 3012.9 | 4.5 | 253 | 6.1  | 0.166  | 20.7 | 29.8 |
| 0.85 | 0.68 | 0  | 20 | 0  | 27.5 | 3 | 2606.4 | 4.4 | 140 | 8.8  | 0.094  | 20.3 | 38.9 |
| 1.12 | 0.96 | 0  | 24 | 0  | 19.5 | 4 | 1338.5 | 4.3 | 172 | 4.3  | 0.026  | 17.2 | 22.3 |
| 1.16 | 0.89 | -9 | 28 | 5  | 26   | 1 | 2327.5 | 4.6 | 184 | 8.9  | 0.199  | 6.7  | 46.5 |
| 1.23 | 0.96 | 0  | 25 | 7  | 29   | 0 | 880.77 | 4.5 | 144 | 5    | <0.012 | 16.1 | 41   |
| 1.33 | 1.02 | 0  | 30 | 4  | 25.5 | 0 | 1038.9 | 4.9 | 198 | 4.8  | <0.012 | 16.8 | 36.3 |
| 1.09 | 0.78 | 0  | 30 | 0  | 28.5 | 0 | 1931.2 | 4.7 | 247 | 5.8  | 0.014  | 19   | 22.7 |
| 0.87 | 0.79 | 0  | 27 | 5  | 26   | 1 | 2741.2 | 5   | 184 | 6.3  | <0.012 | 16.5 | 20.5 |
| 0.91 | 0.69 | 0  | 30 | 4  | 28   | 0 | 1499.4 | 5   | 192 | 5.6  | <0.012 | 7.2  | 25.9 |
| 1.10 | 0.91 | 0  | 26 | 5  | 26.5 | 0 | 2099.9 | 4.9 | 162 | 5.5  | 0.018  | 22.4 | 51.3 |
| 1.30 | 0.84 | 0  | 29 | 0  | 28.5 | 0 | 1838.3 | 4.5 | 199 | 5.7  | 0.014  | 16.9 | 45.1 |
| 1.05 | 0.86 | 0  | 30 | 2  | 27   | 0 | 2800.2 | 4.8 | 250 | 6.6  | 0.182  | 24.7 | 31.6 |
| 1.01 | 0.96 | 0  | 26 | 0  | 29   | 0 | 3232   | 4.4 | 225 | 5.7  | 0.295  | 24   | 35.7 |
| 1.13 | 0.88 | 0  | 28 | 0  | 27   | 0 | 1958   | 5   | 193 | 5.2  | 0.137  | 26.3 | 20.6 |
| 0.96 | 0.81 | 0  | 30 | 0  | 27   | 0 | 1598.2 | 4.5 | 200 | 5.7  | <0.012 | 13.6 | 35.8 |
| 1.19 | 1.02 | 0  | 25 | 2  | 28   | 2 | 3830   | 4.7 | 185 | 6.3  | 0.236  | 15.4 | 55.4 |
| 1.24 | 0.96 | 0  | 28 | 2  | 28   | 0 | 1870.2 | 4.7 | 143 | 6.3  | 0.022  | 14.6 | 28.9 |
| 1.08 | 1.00 | 0  | 28 | 0  | 27   | 0 | 1591.4 | 4.6 | 200 | 5.3  | 0.049  | 22   | 22.4 |
| 0.78 | 0.67 | 0  | 28 | 0  | 25.5 | 1 | 1200.4 | 4.7 | 181 | 5.4  | <0.012 | 13.4 | 48.3 |
| 1.29 | 0.92 | 0  | 28 | 1  | 28.5 | 0 | 1877.6 | 4.6 | 194 | 5.5  | 0.016  | 16.2 | 19   |
| 1.08 | 0.92 | 0  | 19 | 25 | 23   | 1 | 1930   | 4.4 | 176 | 5.8  | 0.985  | 14.3 | 35.1 |

|      |      |      |    |   |      |   |        |     |     |      |        |      |        |
|------|------|------|----|---|------|---|--------|-----|-----|------|--------|------|--------|
| 0.89 | 0.81 | 0    | 22 | 2 | 29.5 | 0 | 1540   | 4.7 | 163 | 5.2  | 0.108  | 14.2 | 60.6   |
| 1.23 | 1.07 | 0    | 28 | 0 | 29   | 0 | 2349.5 | 4.4 | 221 | 5.7  | 0.077  | 20.1 | 56.8   |
| 1.31 | 0.99 | 0    | 29 | 1 | 25.5 | 0 | 3454.3 | 3.9 | 146 | 5.8  | 0.17   | 5.7  | 123.3  |
| 0.96 | 0.87 | 0    | 20 | 1 | 29   | 1 | 3261.9 | 4.4 | 259 | 11.2 | 1.78   | 13.1 | 29.8   |
| 0.96 | 0.83 | 0    | 28 | 2 | 27   | 0 | 1071.5 | 4.6 | 239 | 5.4  | 0.034  | 18   | 51.1   |
| 1.12 | 0.83 | -1.5 | 23 | 0 | 28   | 1 | 2131.6 | 4.3 | 156 | 5.9  | 0.18   | 23.2 | 59.4   |
| 1.42 | 0.95 | 0    | 30 | 0 | 29   | 0 | 1570.8 | 4.8 | 222 | 6    | 0.089  | 18.2 | 50.3   |
| 1.12 | 0.98 | 0    | 29 | 0 | 27.5 | 1 | 1767.6 | 5   | 127 | 5.5  | 0.566  | 20.9 | 22.2   |
| 1.24 | 0.98 | 0    | 29 | 0 | 30   | 0 | 1868.1 | 4.7 | 183 | 5.4  | 0.027  | 25.4 | 30.7   |
| 1.17 | 0.87 | 0    | 29 | 0 | 28   | 0 | 1389.2 | 4.7 | 181 | 4.9  | <0.012 | 13.2 | 61.2   |
| 1.11 | 0.82 | 0    | 29 | 1 | 25   | 0 | 1400.4 | 4.5 | 227 | 5.5  | 0.017  | 19.4 | 61.9   |
| 0.92 | 0.95 | 0    | 29 | 0 | 28.5 | 0 | 1689.8 | 4.4 | 240 | 5.4  | 0.102  | 19.6 | 52.7   |
| 1.16 | 0.83 | 0    | 29 | 2 | 27.5 | 0 | 1863   | 4.4 | 266 | 6.5  | 0.38   | 14.7 | 29.7   |
| 0.84 | 0.84 | 0    | 29 | 3 | 26.5 | 4 | 1610.3 | 4.5 | 235 | 5.5  | <0.012 | 17.7 | 54.6   |
| 0.95 | 0.64 | 0    | 27 | 1 | 27   | 3 | 1878.8 | 4.5 | 139 | 7.1  | 0.145  | 14.4 | 72.6   |
| 1.11 | 0.79 | 0    | 26 | 0 | 30   | 0 | 2619.8 | 4.4 | 209 | 5.7  | 0.25   | 15.4 | 16.2   |
| 0.90 | 0.90 | 0    | 28 | 0 | 25.5 | 0 | 1449.3 | 4.5 | 216 | 5.6  | <0.012 | 25.9 | 30.7   |
| 0.98 | 0.93 | 0    | 30 | 0 | 28.5 | 0 | 2741   | 4.8 | 158 | 5.5  | <0.012 | 27.3 | 36.7   |
| 1.29 | 1.11 | 0    | 28 | 0 | 28   | 0 | 1930.5 | 4.3 | 204 | 6.2  | 0.04   | 19.2 | 110.2  |
| 0.93 | 0.69 | 0    | 29 | 0 | 30   | 0 | 1979.8 | 4.5 | 202 | 5.4  | 0.166  | 22.6 | 39.9   |
| 0.96 | 0.81 | 0    | 28 | 0 | 29   | 0 | 1468.2 | 4.2 | 184 | 5.7  | 0.076  | 19   | 57.9   |
| 1.19 | 1.10 | 0    | 29 | 2 | 27.5 | 0 | 1539.5 | 4.7 | 247 | 5.7  | 1.024  | 13.5 | 47.6   |
| 1.07 | 1.11 | 0    | 28 | 1 | 26   | 0 | 1088.2 | 4.4 | 231 | 5.8  | <0.012 | 19.8 | 59.6   |
| 0.89 | 0.82 | 0    | 29 | 0 | 29   | 0 | 2813.1 | 5   | 211 | 4.9  | 0.044  | 18.9 | 32.7   |
| 1.18 | 1.09 | 0    | 26 | 0 | 28.5 | 0 | 2629.4 | 4.7 | 150 | 6    | 0.018  | 16.5 | 67.2   |
| 1.27 | 0.98 | 0    | 29 | 0 | 28.5 | 0 | 2341.4 | 4.3 | 185 | 5.2  | 0.041  | 24   | 21.6   |
| 1.37 | 1.02 | 0    | 28 | 3 | 24.5 | 2 | 1261.5 | 4.2 | 199 | 5.6  | 0.023  | 20.5 | 50.9   |
| 1.00 | 0.67 | -3   | 27 | 3 | 28   | 4 | 1331.7 | 4.7 | 232 | 5.8  | 0.471  | 19.4 | 306.7  |
| 0.91 | 0.70 | 0    | 29 | 0 | 27.5 | 0 | 1678.7 | 4.5 | 166 | 5.8  | 0.089  | 16.5 | 22.5   |
| 0.82 | 0.60 | 0    | 29 | 0 | 22   | 2 | 1149.3 | 4.3 | 147 | 5.1  | <0.012 | 4.2  | 1534.8 |
| 1.05 | 0.87 | 0    | 29 | 2 | 28.5 | 0 | 3020.7 | 4.9 | 248 | 5.9  | 0.077  | 18.7 | 47.9   |
| 1.05 | 0.91 | 0    | 30 | 0 | 27   | 0 | 1510.3 | 4.6 | 180 | 5.3  | <0.012 | 27.6 | 32     |
| 1.10 | 0.93 | 0    | 25 | 1 | 26.5 | 2 | 2102.6 | 4.5 | 167 | 5.3  | 2.411  | 32.7 | 2.5    |
| 1.23 | 1.03 | 0    | 28 | 0 | 27.5 | 2 | 2180   | 4.6 | 172 | 5.3  | 0.052  | 17   | 58.1   |
| 0.83 | 0.74 | 0    | 25 | 0 | 21.5 | 0 | 2158.2 | 4.5 | 222 | 6.6  | 0.142  | 17.1 | 99.8   |
| 1.21 | 0.95 | 0    | 27 | 0 | 28.5 | 0 | 1940.5 | 4.6 | 151 | 5.4  | 0.071  | 22.2 | 50.4   |
| 0.78 | 0.63 | 0    | 30 | 1 | 22.5 | 0 | 1330.6 | 4.5 | 215 | 5.1  | <0.012 | 20   | 24.8   |
| 1.06 | 0.89 | 0    | 29 | 1 | 28   | 0 | 1668.6 | 4.6 | 201 | 5.3  | 0.096  | 19.3 | 31.9   |
| 1.13 | 1.01 | 0    | 30 | 1 | 28   | 1 | 1398.7 | 4.4 | 170 | 5.9  | 0.03   | 17.5 | 59.3   |
| 0.95 | 0.92 | 0    | 30 | 1 | 26.5 | 0 | 1489.2 | 4.6 | 173 | 5.8  | 0.145  | 13.9 | 18.6   |
